# Supplementary material for: ASB3 ablation has no detectable effects on spermatogenesis and fertility in male mice
Source: PeerJ journal article supplement (doi:10.7717/peerj.19738), 2025-07-31
Supplement: MIQEChecklist.xls [file MIQEChecklist.xls]

## Sheet: Sheet1
ITEM TO CHECK	IMPORTANCE	CHECKLIST
EXPERIMENTAL DESIGN
Definition of experimental and control groups	E	line140,lin210-213
Number within each group	E	line431-434,line211-213
Assay carried out by core lab or investigator's lab?	D	Not Applicable
Acknowledgement of authors' contributions	D	Not Applicable
SAMPLE
Description	E	line133-140
Volume/mass of sample processed	D	Not Applicable
Microdissection or macrodissection	E	line133-140
Processing procedure	E	line133-140
If frozen - how and how quickly?	E	line133-140
If fixed - with what, how quickly?	E	line133-140
Sample storage conditions and duration (especially for FFPE samples)	E	line133-140
NUCLEIC ACID EXTRACTION
Procedure and/or instrumentation	E	line133-140
Name of kit and details of any modifications	E	line136-137
Source of additional reagents used	D	Not Applicable
Details of DNase or RNAse treatment	E	line133-140
Contamination assessment (DNA or RNA)	E	line133-140
Nucleic acid quantification	E	line133-140
Instrument and method	E	line133-140
Purity (A260/A280)	D	Not Applicable
Yield	D	Not Applicable
RNA integrity method/instrument	E	line133-140
RIN/RQI or Cq of 3' and 5' transcripts	E	line133-140
Electrophoresis traces	D	Not Applicable
Inhibition testing (Cq dilutions, spike or other)	E	line133-140
REVERSE TRANSCRIPTION
Complete reaction conditions	E	line133-140
Amount of RNA and reaction volume	E	line133-140
Priming oligonucleotide (if using GSP) and concentration	E	line133-140
Reverse transcriptase and concentration	E	line133-140
Temperature and time	E	line133-140
Manufacturer of reagents and catalogue numbers	D	Not Applicable
Cqs with and without RT	D*	Not Applicable
Storage conditions of cDNA	D	Not Applicable
qPCR TARGET INFORMATION
If multiplex, efficiency and LOD of each assay.	E	line133-140
Sequence accession number	E	line133-140
Location of amplicon	D	Not Applicable
Amplicon length	E	line133-140
In silico specificity screen (BLAST, etc)	E	line133-140
Pseudogenes, retropseudogenes or other homologs?	D	Not Applicable
Sequence alignment	D	Not Applicable
Secondary structure analysis of amplicon	D	Not Applicable
Location of each primer by exon or intron (if applicable)	E	line133-140
What splice variants are targeted?	E	line133-140
qPCR OLIGONUCLEOTIDES
Primer sequences	E	line133-140
RTPrimerDB Identification Number	D	Not Applicable
Probe sequences	D**	Not Applicable
Location and identity of any modifications	E	line133-140
Manufacturer of oligonucleotides	D	Not Applicable
Purification method	D	Not Applicable
qPCR PROTOCOL
Complete reaction conditions	E	line133-140
Reaction volume and amount of cDNA/DNA	E	line133-140
Primer, (probe), Mg++ and dNTP concentrations	E	line133-140
Polymerase identity and concentration	E	line133-140
Buffer/kit identity and manufacturer	E	line133-140
Exact chemical constitution of the buffer	D	Not Applicable
Additives (SYBR Green I, DMSO, etc.)	E	line133-140
Manufacturer of plates/tubes and catalog number	D	Not Applicable
Complete thermocycling parameters	E	line133-140
Reaction setup (manual/robotic)	D	Not Applicable
Manufacturer of qPCR instrument	E	line133-140
qPCR VALIDATION
Evidence of optimisation (from gradients)	D	Not Applicable
Specificity (gel, sequence, melt, or digest)	E	line133-140
For SYBR Green I, Cq of the NTC	E	line133-140
Standard curves with slope and y-intercept	E	line133-140
PCR efficiency calculated from slope	E	line133-140
Confidence interval for PCR efficiency or standard error	D	Not Applicable
r2 of standard curve	E	line133-140
Linear dynamic range	E	line133-140
Cq variation at lower limit	E	line133-140
Confidence intervals throughout range	D	Not Applicable
Evidence for limit of detection	E	line133-140
If multiplex, efficiency and LOD of each assay.	E	line133-140
DATA ANALYSIS
qPCR analysis program (source, version)	E	line133-140
Cq method determination	E	line133-140
Outlier identification and disposition	E	line133-140
Results of NTCs	E	line133-140
Justification of number and choice of reference genes	E	line133-140
Description of normalisation method	E	line133-140
Number and concordance of biological replicates	D	Not Applicable
Number and stage (RT or qPCR) of technical replicates	E	line133-140
Repeatability (intra-assay variation)	E	line133-140
Reproducibility (inter-assay variation, %CV)	D	Not Applicable
Power analysis	D	Not Applicable
Statistical methods for result significance	E	line194-199
Software (source, version)	E	line194-199
Cq or raw data submission using RDML	D	Not Applicable
Table 1. MIQE checklist for authors, reviewers and editors. All essential information (E) must be submitted with the manuscript. Desirable
information (D) should be submitted if available. If using primers obtained from RTPrimerDB, information on qPCR target, oligonucleotides,
protocols and validation is available from that source.
*: Assessing the absence of DNA using a no RT assay is essential when first extracting RNA. Once the sample has been validated as
RDNA-free, inclusion of a no-RT control is desirable, but no longer essential.
**: Disclosure of the probe sequence is highly desirable and strongly encouraged. However, since not all commercial pre-designed assay
vendors provide this information, it cannot be an essential requirement. Use of such assays is advised against.
