# Supplementary material for: ASB3 ablation has no detectable effects on spermatogenesis and fertility in male mice
Source: PeerJ journal article supplement (doi:10.7717/peerj.19738), 2025-07-31
Supplement: RawData3AF.zip [file parameters for hemocytometer of semen.xlsx]

## Sheet: Sheet1
type	parameters
	sperm counts（M/ml）	pups/Litters	motile sperms（% count）	progressive sperms（% count）	testis/body weight ratio
Heter	55.47	7	73.1	20.4	0.0072
	58.83	8	70.8	19.7	0.007
	53.32	8	71.4	22.5	0.0071
	sperm counts（M/ml）	pups	motile sperms（% count）	progressive sperms（% count）	testis/body weight ratio
KO	53.74	9	72.9	21.7	0.0071
	60.43	7	72	21.3	0.0071
	54.74	7	70.6	21.5	0.0069
