# Supplementary material for: ASB3 ablation has no detectable effects on spermatogenesis and fertility in male mice
Source: PeerJ journal article supplement (doi:10.7717/peerj.19738), 2025-07-31
Supplement: RawDataFig1.zip [file 2021-07-10_000241.xls]

## Sheet: Sample Setup
Block Type	96-Well 0.2-mL Block
Calibration Background is expired	No
Calibration Background performed on	04-12-2018
Calibration Pure Dye ABY is expired	No
Calibration Pure Dye ABY performed on	04-12-2018
Calibration Pure Dye CY5 is expired	No
Calibration Pure Dye CY5 performed on	04-12-2018
Calibration Pure Dye FAM is expired	No
Calibration Pure Dye FAM performed on	04-12-2018
Calibration Pure Dye JUN is expired	No
Calibration Pure Dye JUN performed on	04-12-2018
Calibration Pure Dye MUSTANG PURPLE is expired	No
Calibration Pure Dye MUSTANG PURPLE performed on	04-12-2018
Calibration Pure Dye NED is expired	No
Calibration Pure Dye NED performed on	04-12-2018
Calibration Pure Dye ROX is expired	No
Calibration Pure Dye ROX performed on	04-12-2018
Calibration Pure Dye SYBR is expired	No
Calibration Pure Dye SYBR performed on	04-12-2018
Calibration Pure Dye TAMRA is expired	No
Calibration Pure Dye TAMRA performed on	04-12-2018
Calibration Pure Dye VIC is expired	No
Calibration Pure Dye VIC performed on	04-12-2018
Calibration ROI is expired	No
Calibration ROI performed on	04-12-2018
Calibration Uniformity is expired	No
Calibration Uniformity performed on	04-12-2018
Chemistry	SYBR_GREEN
Date Created	2021-07-10 01:26:38 AM PDT
Experiment Barcode
Experiment Comment
Experiment File Name	D:\datas\zhu lab\wdy\2021-07-10_000241.eds
Experiment Name	2021-07-10_000241
Experiment Run End Time	Not Started
Experiment Type	Standard Curve
Instrument Name
Instrument Serial Number
Instrument Type	QuantStudio™ 5 System
Passive Reference	ROX
Post-read Stage/Step
Pre-read Stage/Step
Quantification Cycle Method	Ct
Signal Smoothing On	true
Stage where Melt Analysis is performed	Stage3
Stage/ Cycle where Ct Analysis is performed	Stage2, Step2
User Name
Well	Well Position	Sample Name	Sample Color	Biogroup Name	Biogroup Color	Target Name	Target Color	Task	Reporter	Quencher	Quantity	Comments
1	A1	wt	RGB(176,23,31)			Target 1	RGB(176,23,31)	UNKNOWN	SYBR	None
2	A2	wt	RGB(176,23,31)			Target 1	RGB(176,23,31)	UNKNOWN	SYBR	None
3	A3	wt	RGB(176,23,31)			Target 1	RGB(176,23,31)	UNKNOWN	SYBR	None
4	A4	ko	RGB(0,0,255)			Target 1	RGB(176,23,31)	UNKNOWN	SYBR	None
5	A5	ko	RGB(0,0,255)			Target 1	RGB(176,23,31)	UNKNOWN	SYBR	None
6	A6	ko	RGB(0,0,255)			Target 1	RGB(176,23,31)	UNKNOWN	SYBR	None
7	A7	wt	RGB(176,23,31)			Target 2	RGB(0,0,255)	UNKNOWN	SYBR	None
8	A8	wt	RGB(176,23,31)			Target 2	RGB(0,0,255)	UNKNOWN	SYBR	None
9	A9	wt	RGB(176,23,31)			Target 2	RGB(0,0,255)	UNKNOWN	SYBR	None
10	A10	ko	RGB(0,0,255)			Target 2	RGB(0,0,255)	UNKNOWN	SYBR	None
11	A11	ko	RGB(0,0,255)			Target 2	RGB(0,0,255)	UNKNOWN	SYBR	None
12	A12	ko	RGB(0,0,255)			Target 2	RGB(0,0,255)	UNKNOWN	SYBR	None
13	B1	wt	RGB(176,23,31)			Target 3	RGB(0,139,69)	UNKNOWN	SYBR	None
14	B2	wt	RGB(176,23,31)			Target 3	RGB(0,139,69)	UNKNOWN	SYBR	None
15	B3	wt	RGB(176,23,31)			Target 3	RGB(0,139,69)	UNKNOWN	SYBR	None
16	B4	ko	RGB(0,0,255)			Target 3	RGB(0,139,69)	UNKNOWN	SYBR	None
17	B5	ko	RGB(0,0,255)			Target 3	RGB(0,139,69)	UNKNOWN	SYBR	None
18	B6	ko	RGB(0,0,255)			Target 3	RGB(0,139,69)	UNKNOWN	SYBR	None
19	B7	wt	RGB(176,23,31)			Target 4	RGB(238,238,0)	UNKNOWN	SYBR	None
20	B8	wt	RGB(176,23,31)			Target 4	RGB(238,238,0)	UNKNOWN	SYBR	None
21	B9	wt	RGB(176,23,31)			Target 4	RGB(238,238,0)	UNKNOWN	SYBR	None
22	B10	ko	RGB(0,0,255)			Target 4	RGB(238,238,0)	UNKNOWN	SYBR	None
23	B11	ko	RGB(0,0,255)			Target 4	RGB(238,238,0)	UNKNOWN	SYBR	None
24	B12	ko	RGB(0,0,255)			Target 4	RGB(238,238,0)	UNKNOWN	SYBR	None
25	C1	wt	RGB(176,23,31)			Target 5	RGB(139,137,112)	UNKNOWN	SYBR	None
26	C2	wt	RGB(176,23,31)			Target 5	RGB(139,137,112)	UNKNOWN	SYBR	None
27	C3	wt	RGB(176,23,31)			Target 5	RGB(139,137,112)	UNKNOWN	SYBR	None
28	C4	ko	RGB(0,0,255)			Target 5	RGB(139,137,112)	UNKNOWN	SYBR	None
29	C5	ko	RGB(0,0,255)			Target 5	RGB(139,137,112)	UNKNOWN	SYBR	None
30	C6	ko	RGB(0,0,255)			Target 5	RGB(139,137,112)	UNKNOWN	SYBR	None
31	C7	wt	RGB(176,23,31)			Target 6	RGB(238,121,66)	UNKNOWN	SYBR	None
32	C8	wt	RGB(176,23,31)			Target 6	RGB(238,121,66)	UNKNOWN	SYBR	None
33	C9	wt	RGB(176,23,31)			Target 6	RGB(238,121,66)	UNKNOWN	SYBR	None
34	C10	ko	RGB(0,0,255)			Target 6	RGB(238,121,66)	UNKNOWN	SYBR	None
35	C11	ko	RGB(0,0,255)			Target 6	RGB(238,121,66)	UNKNOWN	SYBR	None
36	C12	ko	RGB(0,0,255)			Target 6	RGB(238,121,66)	UNKNOWN	SYBR	None
37	D1	wt	RGB(176,23,31)			Target 7	RGB(142,56,142)	UNKNOWN	SYBR	None
38	D2	wt	RGB(176,23,31)			Target 7	RGB(142,56,142)	UNKNOWN	SYBR	None
39	D3	wt	RGB(176,23,31)			Target 7	RGB(142,56,142)	UNKNOWN	SYBR	None
40	D4	ko	RGB(0,0,255)			Target 7	RGB(142,56,142)	UNKNOWN	SYBR	None
41	D5	ko	RGB(0,0,255)			Target 7	RGB(142,56,142)	UNKNOWN	SYBR	None
42	D6	ko	RGB(0,0,255)			Target 7	RGB(142,56,142)	UNKNOWN	SYBR	None
43	D7	wt	RGB(176,23,31)			Target 8	RGB(198,113,113)	UNKNOWN	SYBR	None
44	D8	wt	RGB(176,23,31)			Target 8	RGB(198,113,113)	UNKNOWN	SYBR	None
45	D9	wt	RGB(176,23,31)			Target 8	RGB(198,113,113)	UNKNOWN	SYBR	None
46	D10	ko	RGB(0,0,255)			Target 8	RGB(198,113,113)	UNKNOWN	SYBR	None
47	D11	ko	RGB(0,0,255)			Target 8	RGB(198,113,113)	UNKNOWN	SYBR	None
48	D12	ko	RGB(0,0,255)			Target 8	RGB(198,113,113)	UNKNOWN	SYBR	None
49	E1	wt	RGB(176,23,31)			Target 9	RGB(0,245,255)	UNKNOWN	SYBR	None
50	E2	wt	RGB(176,23,31)			Target 9	RGB(0,245,255)	UNKNOWN	SYBR	None
51	E3	wt	RGB(176,23,31)			Target 9	RGB(0,245,255)	UNKNOWN	SYBR	None
52	E4	ko	RGB(0,0,255)			Target 9	RGB(0,245,255)	UNKNOWN	SYBR	None
53	E5	ko	RGB(0,0,255)			Target 9	RGB(0,245,255)	UNKNOWN	SYBR	None
54	E6	ko	RGB(0,0,255)			Target 9	RGB(0,245,255)	UNKNOWN	SYBR	None
55	E7	wt	RGB(176,23,31)			Target 10	RGB(238,220,130)	UNKNOWN	SYBR	None
56	E8	wt	RGB(176,23,31)			Target 10	RGB(238,220,130)	UNKNOWN	SYBR	None
57	E9	wt	RGB(176,23,31)			Target 10	RGB(238,220,130)	UNKNOWN	SYBR	None
58	E10	ko	RGB(0,0,255)			Target 10	RGB(238,220,130)	UNKNOWN	SYBR	None
59	E11	ko	RGB(0,0,255)			Target 10	RGB(238,220,130)	UNKNOWN	SYBR	None
60	E12	ko	RGB(0,0,255)			Target 10	RGB(238,220,130)	UNKNOWN	SYBR	None
61	F1	wt	RGB(176,23,31)			Target 11	RGB(255,127,0)	UNKNOWN	SYBR	None
62	F2	wt	RGB(176,23,31)			Target 11	RGB(255,127,0)	UNKNOWN	SYBR	None
63	F3	wt	RGB(176,23,31)			Target 11	RGB(255,127,0)	UNKNOWN	SYBR	None
64	F4	ko	RGB(0,0,255)			Target 11	RGB(255,127,0)	UNKNOWN	SYBR	None
65	F5	ko	RGB(0,0,255)			Target 11	RGB(255,127,0)	UNKNOWN	SYBR	None
66	F6	ko	RGB(0,0,255)			Target 11	RGB(255,127,0)	UNKNOWN	SYBR	None
67	F7	wt	RGB(176,23,31)			Target 13	RGB(142,142,56)	UNKNOWN	SYBR	None
68	F8	wt	RGB(176,23,31)			Target 13	RGB(142,142,56)	UNKNOWN	SYBR	None
69	F9	wt	RGB(176,23,31)			Target 13	RGB(142,142,56)	UNKNOWN	SYBR	None
70	F10	ko	RGB(0,0,255)			Target 13	RGB(142,142,56)	UNKNOWN	SYBR	None
71	F11	ko	RGB(0,0,255)			Target 13	RGB(142,142,56)	UNKNOWN	SYBR	None
72	F12	ko	RGB(0,0,255)			Target 13	RGB(142,142,56)	UNKNOWN	SYBR	None
73	G1	wt	RGB(176,23,31)			Target 14	RGB(238,44,44)	UNKNOWN	SYBR	None
74	G2	wt	RGB(176,23,31)			Target 14	RGB(238,44,44)	UNKNOWN	SYBR	None
75	G3	wt	RGB(176,23,31)			Target 14	RGB(238,44,44)	UNKNOWN	SYBR	None
76	G4	ko	RGB(0,0,255)			Target 14	RGB(238,44,44)	UNKNOWN	SYBR	None
77	G5	ko	RGB(0,0,255)			Target 14	RGB(238,44,44)	UNKNOWN	SYBR	None
78	G6	ko	RGB(0,0,255)			Target 14	RGB(238,44,44)	UNKNOWN	SYBR	None
79	G7	wt	RGB(176,23,31)			Target 15	RGB(51,161,201)	UNKNOWN	SYBR	None
80	G8	wt	RGB(176,23,31)			Target 15	RGB(51,161,201)	UNKNOWN	SYBR	None
81	G9	wt	RGB(176,23,31)			Target 15	RGB(51,161,201)	UNKNOWN	SYBR	None
82	G10	ko	RGB(0,0,255)			Target 15	RGB(51,161,201)	UNKNOWN	SYBR	None
83	G11	ko	RGB(0,0,255)			Target 15	RGB(51,161,201)	UNKNOWN	SYBR	None
84	G12	ko	RGB(0,0,255)			Target 15	RGB(51,161,201)	UNKNOWN	SYBR	None
85	H1	wt	RGB(176,23,31)			Target 16	RGB(238,18,137)	UNKNOWN	SYBR	None
86	H2	wt	RGB(176,23,31)			Target 16	RGB(238,18,137)	UNKNOWN	SYBR	None
87	H3	wt	RGB(176,23,31)			Target 16	RGB(238,18,137)	UNKNOWN	SYBR	None
88	H4	ko	RGB(0,0,255)			Target 16	RGB(238,18,137)	UNKNOWN	SYBR	None
89	H5	ko	RGB(0,0,255)			Target 16	RGB(238,18,137)	UNKNOWN	SYBR	None
90	H6	ko	RGB(0,0,255)			Target 16	RGB(238,18,137)	UNKNOWN	SYBR	None
91	H7	wt	RGB(176,23,31)			18s	RGB(176,23,31)	UNKNOWN	SYBR	None
92	H8	wt	RGB(176,23,31)			18s	RGB(176,23,31)	UNKNOWN	SYBR	None
93	H9	wt	RGB(176,23,31)			18s	RGB(176,23,31)	UNKNOWN	SYBR	None
94	H10	ko	RGB(0,0,255)			18s	RGB(176,23,31)	UNKNOWN	SYBR	None
95	H11	ko	RGB(0,0,255)			18s	RGB(176,23,31)	UNKNOWN	SYBR	None
96	H12	ko	RGB(0,0,255)			18s	RGB(176,23,31)	UNKNOWN	SYBR	None

## Sheet: Amplification Data
Block Type	96-Well 0.2-mL Block
Calibration Background is expired	No
Calibration Background performed on	04-12-2018
Calibration Pure Dye ABY is expired	No
Calibration Pure Dye ABY performed on	04-12-2018
Calibration Pure Dye CY5 is expired	No
Calibration Pure Dye CY5 performed on	04-12-2018
Calibration Pure Dye FAM is expired	No
Calibration Pure Dye FAM performed on	04-12-2018
Calibration Pure Dye JUN is expired	No
Calibration Pure Dye JUN performed on	04-12-2018
Calibration Pure Dye MUSTANG PURPLE is expired	No
Calibration Pure Dye MUSTANG PURPLE performed on	04-12-2018
Calibration Pure Dye NED is expired	No
Calibration Pure Dye NED performed on	04-12-2018
Calibration Pure Dye ROX is expired	No
Calibration Pure Dye ROX performed on	04-12-2018
Calibration Pure Dye SYBR is expired	No
Calibration Pure Dye SYBR performed on	04-12-2018
Calibration Pure Dye TAMRA is expired	No
Calibration Pure Dye TAMRA performed on	04-12-2018
Calibration Pure Dye VIC is expired	No
Calibration Pure Dye VIC performed on	04-12-2018
Calibration ROI is expired	No
Calibration ROI performed on	04-12-2018
Calibration Uniformity is expired	No
Calibration Uniformity performed on	04-12-2018
Chemistry	SYBR_GREEN
Date Created	2021-07-10 01:26:38 AM PDT
Experiment Barcode
Experiment Comment
Experiment File Name	D:\datas\zhu lab\wdy\2021-07-10_000241.eds
Experiment Name	2021-07-10_000241
Experiment Run End Time	Not Started
Experiment Type	Standard Curve
Instrument Name
Instrument Serial Number
Instrument Type	QuantStudio™ 5 System
Passive Reference	ROX
Post-read Stage/Step
Pre-read Stage/Step
Quantification Cycle Method	Ct
Signal Smoothing On	true
Stage where Melt Analysis is performed	Stage3
Stage/ Cycle where Ct Analysis is performed	Stage2, Step2
User Name
Well	Well Position	Cycle	Target Name	Rn	Delta Rn
1	A1	1	Target 1	0.340721	-0.035203
1	A1	2	Target 1	0.366158	-0.0136687
1	A1	3	Target 1	0.372386	-0.011344
1	A1	4	Target 1	0.381008	-0.00662453
1	A1	5	Target 1	0.389434	-0.00210107
1	A1	6	Target 1	0.401029	0.00559145
1	A1	7	Target 1	0.397751	-0.00158959
1	A1	8	Target 1	0.403572	0.000329232
1	A1	9	Target 1	0.412514	0.00536833
1	A1	10	Target 1	0.415579	0.00453012
1	A1	11	Target 1	0.418189	0.00323798
1	A1	12	Target 1	0.420543	0.00168919
1	A1	13	Target 1	0.425245	0.00248783
1	A1	14	Target 1	0.443027	0.0163681
1	A1	15	Target 1	0.436373	0.00581062
1	A1	16	Target 1	0.432382	-0.0020824
1	A1	17	Target 1	0.441137	0.0027696
1	A1	18	Target 1	0.432979	-0.0092913
1	A1	19	Target 1	0.441882	-0.00429083
1	A1	20	Target 1	0.439217	-0.0108587
1	A1	21	Target 1	0.445076	-0.0089027
1	A1	22	Target 1	0.472918	0.0150365
1	A1	23	Target 1	0.47661	0.014826
1	A1	24	Target 1	0.522346	0.0566601
1	A1	25	Target 1	0.580994	0.111404
1	A1	26	Target 1	0.722575	0.249083
1	A1	27	Target 1	0.943601	0.466207
1	A1	28	Target 1	1.253	0.771707
1	A1	29	Target 1	1.68534	1.20014
1	A1	30	Target 1	2.08883	1.59973
1	A1	31	Target 1	2.3728	1.8798
1	A1	32	Target 1	2.51557	2.01866
1	A1	33	Target 1	2.64645	2.14564
1	A1	34	Target 1	2.71699	2.21228
1	A1	35	Target 1	2.74933	2.24071
1	A1	36	Target 1	2.83549	2.32297
1	A1	37	Target 1	2.83415	2.31773
1	A1	38	Target 1	2.87206	2.35174
1	A1	39	Target 1	2.90344	2.37921
1	A1	40	Target 1	2.90041	2.37228
2	A2	1	Target 1	0.229345	-0.0319208
2	A2	2	Target 1	0.246691	-0.016422
2	A2	3	Target 1	0.253629	-0.0113314
2	A2	4	Target 1	0.259318	-0.00748933
2	A2	5	Target 1	0.272483	0.00382823
2	A2	6	Target 1	0.282737	0.0122354
2	A2	7	Target 1	0.267898	-0.00445119
2	A2	8	Target 1	0.281276	0.00707949
2	A2	9	Target 1	0.28198	0.00593652
2	A2	10	Target 1	0.284255	0.0063641
2	A2	11	Target 1	0.27263	-0.00710796
2	A2	12	Target 1	0.283243	0.00165753
2	A2	13	Target 1	0.283598	0.00016582
2	A2	14	Target 1	0.29407	0.00879077
2	A2	15	Target 1	0.282288	-0.00483898
2	A2	16	Target 1	0.283121	-0.00585323
2	A2	17	Target 1	0.288948	-0.00187348
2	A2	18	Target 1	0.284859	-0.00780947
2	A2	19	Target 1	0.287293	-0.00722301
2	A2	20	Target 1	0.308873	0.0125098
2	A2	21	Target 1	0.29762	-0.000589585
2	A2	22	Target 1	0.319054	0.0189972
2	A2	23	Target 1	0.340837	0.0389324
2	A2	24	Target 1	0.379564	0.0758124
2	A2	25	Target 1	0.466076	0.160478
2	A2	26	Target 1	0.6046	0.297154
2	A2	27	Target 1	0.846802	0.537509
2	A2	28	Target 1	1.22329	0.912155
2	A2	29	Target 1	1.69371	1.38072
2	A2	30	Target 1	2.17905	1.86422
2	A2	31	Target 1	2.52086	2.20418
2	A2	32	Target 1	2.705	2.38647
2	A2	33	Target 1	2.81367	2.49329
2	A2	34	Target 1	2.91687	2.59464
2	A2	35	Target 1	2.97911	2.65504
2	A2	36	Target 1	3.03463	2.70871
2	A2	37	Target 1	3.07259	2.74482
2	A2	38	Target 1	3.10596	2.77635
2	A2	39	Target 1	3.11165	2.78019
2	A2	40	Target 1	3.09488	2.76157
3	A3	1	Target 1	0.0629724	-0.0259799
3	A3	2	Target 1	0.0715506	-0.0189379
3	A3	3	Target 1	0.0909287	-0.00109605
3	A3	4	Target 1	0.0882537	-0.00530728
3	A3	5	Target 1	0.093493	-0.0016042
3	A3	6	Target 1	0.0985624	0.00192894
3	A3	7	Target 1	0.0988456	0.000675888
3	A3	8	Target 1	0.0935716	-0.00613431
3	A3	9	Target 1	0.106585	0.00534238
3	A3	10	Target 1	0.103699	0.000920893
3	A3	11	Target 1	0.104948	0.000633154
3	A3	12	Target 1	0.110866	0.00501534
3	A3	13	Target 1	0.114567	0.00717994
3	A3	14	Target 1	0.116623	0.00769971
3	A3	15	Target 1	0.108196	-0.00226361
3	A3	16	Target 1	0.10584	-0.00615553
3	A3	17	Target 1	0.113039	-0.00049292
3	A3	18	Target 1	0.110277	-0.00479151
3	A3	19	Target 1	0.118785	0.00218035
3	A3	20	Target 1	0.11441	-0.00373117
3	A3	21	Target 1	0.120807	0.00112967
3	A3	22	Target 1	0.138949	0.017736
3	A3	23	Target 1	0.163827	0.041077
3	A3	24	Target 1	0.210488	0.0862018
3	A3	25	Target 1	0.296853	0.171031
3	A3	26	Target 1	0.448978	0.321619
3	A3	27	Target 1	0.704333	0.575438
3	A3	28	Target 1	1.1102	0.979766
3	A3	29	Target 1	1.61917	1.48721
3	A3	30	Target 1	2.14077	2.00727
3	A3	31	Target 1	2.51131	2.37627
3	A3	32	Target 1	2.71068	2.5741
3	A3	33	Target 1	2.82233	2.68422
3	A3	34	Target 1	2.93156	2.79191
3	A3	35	Target 1	2.98593	2.84474
3	A3	36	Target 1	3.05623	2.91351
3	A3	37	Target 1	3.0999	2.95564
3	A3	38	Target 1	3.13541	2.98962
3	A3	39	Target 1	3.11113	2.9638
3	A3	40	Target 1	3.14511	2.99625
4	A4	1	Target 1	-1.11636	-0.067734
4	A4	2	Target 1	-1.07358	-0.030135
4	A4	3	Target 1	-1.05565	-0.0173853
4	A4	4	Target 1	-1.03267	0.000413796
4	A4	5	Target 1	-1.01903	0.00886815
4	A4	6	Target 1	-1.02388	-0.00115375
4	A4	7	Target 1	-1.01524	0.00230419
4	A4	8	Target 1	-1.01472	-0.00236283
4	A4	9	Target 1	-0.997549	0.00963097
4	A4	10	Target 1	-0.991011	0.0109884
4	A4	11	Target 1	-0.988209	0.00861083
4	A4	12	Target 1	-1.00466	-0.0130189
4	A4	13	Target 1	-0.983105	0.00335317
4	A4	14	Target 1	-0.980073	0.00120504
4	A4	15	Target 1	-0.979697	-0.00359983
4	A4	16	Target 1	-0.978771	-0.00785397
4	A4	17	Target 1	-0.972589	-0.0068527
4	A4	18	Target 1	-0.958597	0.00195934
4	A4	19	Target 1	-0.945198	0.0101775
4	A4	20	Target 1	-0.925678	0.0245171
4	A4	21	Target 1	-0.877219	0.0677958
4	A4	22	Target 1	-0.789451	0.150383
4	A4	23	Target 1	-0.63501	0.299644
4	A4	24	Target 1	-0.362383	0.567091
4	A4	25	Target 1	0.0527129	0.977006
4	A4	26	Target 1	0.580039	1.49915
4	A4	27	Target 1	1.1395	2.05343
4	A4	28	Target 1	1.57334	2.48209
4	A4	29	Target 1	1.81604	2.71961
4	A4	30	Target 1	1.95235	2.85074
4	A4	31	Target 1	2.06562	2.95883
4	A4	32	Target 1	2.14596	3.03399
4	A4	33	Target 1	2.23102	3.11387
4	A4	34	Target 1	2.27673	3.1544
4	A4	35	Target 1	2.32488	3.19737
4	A4	36	Target 1	2.33164	3.19895
4	A4	37	Target 1	2.34998	3.21211
4	A4	38	Target 1	2.35635	3.2133
4	A4	39	Target 1	2.38452	3.23629
4	A4	40	Target 1	2.38063	3.22722
5	A5	1	Target 1	-0.383926	-0.0634671
5	A5	2	Target 1	-0.336712	-0.0218848
5	A5	3	Target 1	-0.332814	-0.0236185
5	A5	4	Target 1	-0.310378	-0.00681356
5	A5	5	Target 1	-0.29755	0.000382149
5	A5	6	Target 1	-0.279685	0.0126156
5	A5	7	Target 1	-0.281525	0.00514367
5	A5	8	Target 1	-0.271675	0.00936162
5	A5	9	Target 1	-0.263465	0.0119402
5	A5	10	Target 1	-0.260948	0.00882569
5	A5	11	Target 1	-0.261776	0.00236601
5	A5	12	Target 1	-0.254269	0.00424031
5	A5	13	Target 1	-0.260772	-0.00789436
5	A5	14	Target 1	-0.253609	-0.00636261
5	A5	15	Target 1	-0.242529	-0.000914904
5	A5	16	Target 1	-0.237477	-0.00149447
5	A5	17	Target 1	-0.23665	-0.00629942
5	A5	18	Target 1	-0.226197	-0.0014774
5	A5	19	Target 1	-0.227363	-0.00827547
5	A5	20	Target 1	-0.2009	0.012556
5	A5	21	Target 1	-0.149532	0.0582918
5	A5	22	Target 1	-0.0681939	0.133998
5	A5	23	Target 1	0.0696803	0.266241
5	A5	24	Target 1	0.320596	0.511524
5	A5	25	Target 1	0.690039	0.875335
5	A5	26	Target 1	1.18864	1.3683
5	A5	27	Target 1	1.72986	1.90389
5	A5	28	Target 1	2.15218	2.32058
5	A5	29	Target 1	2.37806	2.54083
5	A5	30	Target 1	2.48236	2.6395
5	A5	31	Target 1	2.60641	2.75791
5	A5	32	Target 1	2.70053	2.8464
5	A5	33	Target 1	2.77023	2.91048
5	A5	34	Target 1	2.81285	2.94746
5	A5	35	Target 1	2.83446	2.96344
5	A5	36	Target 1	2.85859	2.98194
5	A5	37	Target 1	2.87382	2.99154
5	A5	38	Target 1	2.87801	2.99009
5	A5	39	Target 1	2.86139	2.96784
5	A5	40	Target 1	2.87461	2.97543
6	A6	1	Target 1	0.278819	-0.0355746
6	A6	2	Target 1	0.295264	-0.0222608
6	A6	3	Target 1	0.308589	-0.0120662
6	A6	4	Target 1	0.32298	-0.0008057
6	A6	5	Target 1	0.326368	-0.000547653
6	A6	6	Target 1	0.332348	0.00230236
6	A6	7	Target 1	0.340589	0.00741273
6	A6	8	Target 1	0.336862	0.000554791
6	A6	9	Target 1	0.344605	0.0051683
6	A6	10	Target 1	0.344586	0.00201809
6	A6	11	Target 1	0.35187	0.00617241
6	A6	12	Target 1	0.347814	-0.00101461
6	A6	13	Target 1	0.34691	-0.00504858
6	A6	14	Target 1	0.355475	0.000385566
6	A6	15	Target 1	0.360788	0.00256878
6	A6	16	Target 1	0.364128	0.00277798
6	A6	17	Target 1	0.359816	-0.00466474
6	A6	18	Target 1	0.362397	-0.00521356
6	A6	19	Target 1	0.376905	0.00616439
6	A6	20	Target 1	0.405693	0.031822
6	A6	21	Target 1	0.441408	0.0644065
6	A6	22	Target 1	0.502565	0.122433
6	A6	23	Target 1	0.625981	0.242719
6	A6	24	Target 1	0.853231	0.466838
6	A6	25	Target 1	1.17639	0.786866
6	A6	26	Target 1	1.60856	1.2159
6	A6	27	Target 1	2.06893	1.67315
6	A6	28	Target 1	2.42197	2.02306
6	A6	29	Target 1	2.62386	2.22182
6	A6	30	Target 1	2.73611	2.33093
6	A6	31	Target 1	2.85056	2.44226
6	A6	32	Target 1	2.89252	2.48108
6	A6	33	Target 1	2.95416	2.53959
6	A6	34	Target 1	3.00223	2.58453
6	A6	35	Target 1	3.01869	2.59787
6	A6	36	Target 1	3.05641	2.63245
6	A6	37	Target 1	3.04389	2.61681
6	A6	38	Target 1	3.05779	2.62757
6	A6	39	Target 1	3.06748	2.63413
6	A6	40	Target 1	3.06857	2.63209
7	A7	1	Target 2	0.202922	-0.00509128
7	A7	2	Target 2	0.203962	-0.00513621
7	A7	3	Target 2	0.205362	-0.00482247
7	A7	4	Target 2	0.211807	0.000536919
7	A7	5	Target 2	0.212211	-0.000144099
7	A7	6	Target 2	0.214785	0.00134403
7	A7	7	Target 2	0.21435	-0.000176147
7	A7	8	Target 2	0.215538	-7.35573e-05
7	A7	9	Target 2	0.222371	0.00567396
7	A7	10	Target 2	0.218111	0.000328183
7	A7	11	Target 2	0.21541	-0.00345852
7	A7	12	Target 2	0.221129	0.00117548
7	A7	13	Target 2	0.222743	0.00170401
7	A7	14	Target 2	0.221195	-0.000930137
7	A7	15	Target 2	0.221266	-0.00194442
7	A7	16	Target 2	0.228275	0.00397895
7	A7	17	Target 2	0.230199	0.00481758
7	A7	18	Target 2	0.226662	0.000194627
7	A7	19	Target 2	0.215265	-0.0122872
7	A7	20	Target 2	0.233562	0.00492347
7	A7	21	Target 2	0.228883	-0.000840647
7	A7	22	Target 2	0.246174	0.0153652
7	A7	23	Target 2	0.252052	0.0201572
7	A7	24	Target 2	0.274275	0.0412952
7	A7	25	Target 2	0.315639	0.0815734
7	A7	26	Target 2	0.394937	0.159786
7	A7	27	Target 2	0.537022	0.300785
7	A7	28	Target 2	0.775385	0.538063
7	A7	29	Target 2	1.12361	0.885202
7	A7	30	Target 2	1.57622	1.33673
7	A7	31	Target 2	2.05417	1.81359
7	A7	32	Target 2	2.44036	2.1987
7	A7	33	Target 2	2.67667	2.43392
7	A7	34	Target 2	2.82095	2.57712
7	A7	35	Target 2	2.92514	2.68022
7	A7	36	Target 2	3.03443	2.78842
7	A7	37	Target 2	3.08093	2.83384
7	A7	38	Target 2	3.15511	2.90693
7	A7	39	Target 2	3.19713	2.94786
7	A7	40	Target 2	3.20369	2.95334
8	A8	1	Target 2	0.318662	-0.0377836
8	A8	2	Target 2	0.333436	-0.0240562
8	A8	3	Target 2	0.350643	-0.00789591
8	A8	4	Target 2	0.357925	-0.00166079
8	A8	5	Target 2	0.360701	6.91683e-05
8	A8	6	Target 2	0.365299	0.00362053
8	A8	7	Target 2	0.371339	0.00861328
8	A8	8	Target 2	0.366869	0.00309639
8	A8	9	Target 2	0.366131	0.00131203
8	A8	10	Target 2	0.37314	0.00727475
8	A8	11	Target 2	0.360823	-0.00608987
8	A8	12	Target 2	0.363512	-0.0044472
8	A8	13	Target 2	0.365401	-0.00360516
8	A8	14	Target 2	0.369734	-0.000318628
8	A8	15	Target 2	0.371801	0.000702037
8	A8	16	Target 2	0.371509	-0.000636658
8	A8	17	Target 2	0.370363	-0.00283026
8	A8	18	Target 2	0.374511	0.000271649
8	A8	19	Target 2	0.375671	0.000384923
8	A8	20	Target 2	0.375375	-0.000957795
8	A8	21	Target 2	0.380477	0.00309752
8	A8	22	Target 2	0.389777	0.011351
8	A8	23	Target 2	0.399486	0.0200129
8	A8	24	Target 2	0.42844	0.0479201
8	A8	25	Target 2	0.475122	0.0935555
8	A8	26	Target 2	0.53956	0.156947
8	A8	27	Target 2	0.670354	0.286694
8	A8	28	Target 2	0.895013	0.510306
8	A8	29	Target 2	1.22663	0.840882
8	A8	30	Target 2	1.65906	1.27226
8	A8	31	Target 2	2.12335	1.7355
8	A8	32	Target 2	2.49059	2.1017
8	A8	33	Target 2	2.69042	2.30048
8	A8	34	Target 2	2.82346	2.43248
8	A8	35	Target 2	2.93231	2.54028
8	A8	36	Target 2	3.03411	2.64103
8	A8	37	Target 2	3.08776	2.69364
8	A8	38	Target 2	3.13701	2.74184
8	A8	39	Target 2	3.17145	2.77523
8	A8	40	Target 2	3.19349	2.79623
9	A9	1	Target 2	0.220671	-0.0234247
9	A9	2	Target 2	0.228688	-0.016636
9	A9	3	Target 2	0.236929	-0.00962291
9	A9	4	Target 2	0.246434	-0.0013452
9	A9	5	Target 2	0.252166	0.00315901
9	A9	6	Target 2	0.249179	-0.00105619
9	A9	7	Target 2	0.255437	0.00397414
9	A9	8	Target 2	0.249579	-0.00311162
9	A9	9	Target 2	0.255274	0.00135495
9	A9	10	Target 2	0.260947	0.00579992
9	A9	11	Target 2	0.253592	-0.0027825
9	A9	12	Target 2	0.265532	0.00792972
9	A9	13	Target 2	0.262104	0.00327378
9	A9	14	Target 2	0.264464	0.00440632
9	A9	15	Target 2	0.257194	-0.00409221
9	A9	16	Target 2	0.262962	0.000448284
9	A9	17	Target 2	0.265938	0.00219621
9	A9	18	Target 2	0.263632	-0.00133728
9	A9	19	Target 2	0.258487	-0.00770966
9	A9	20	Target 2	0.26594	-0.00148477
9	A9	21	Target 2	0.269243	0.000590059
9	A9	22	Target 2	0.283423	0.0135428
9	A9	23	Target 2	0.297884	0.0267754
9	A9	24	Target 2	0.325841	0.0535043
9	A9	25	Target 2	0.360964	0.0873995
9	A9	26	Target 2	0.437383	0.162591
9	A9	27	Target 2	0.578474	0.302454
9	A9	28	Target 2	0.816002	0.538754
9	A9	29	Target 2	1.17151	0.893038
9	A9	30	Target 2	1.63101	1.35131
9	A9	31	Target 2	2.10522	1.82429
9	A9	32	Target 2	2.47387	2.19172
9	A9	33	Target 2	2.70372	2.42033
9	A9	34	Target 2	2.84663	2.56202
9	A9	35	Target 2	2.95738	2.67154
9	A9	36	Target 2	3.05347	2.7664
9	A9	37	Target 2	3.11134	2.82304
9	A9	38	Target 2	3.16644	2.87691
9	A9	39	Target 2	3.19373	2.90297
9	A9	40	Target 2	3.2239	2.93192
10	A10	1	Target 2	0.0553709	-0.0361455
10	A10	2	Target 2	0.0670367	-0.027295
10	A10	3	Target 2	0.0849259	-0.0122211
10	A10	4	Target 2	0.0945432	-0.00541905
10	A10	5	Target 2	0.0969054	-0.00587213
10	A10	6	Target 2	0.113138	0.00754556
10	A10	7	Target 2	0.111604	0.00319587
10	A10	8	Target 2	0.114422	0.00319856
10	A10	9	Target 2	0.126621	0.0125827
10	A10	10	Target 2	0.120179	0.00332518
10	A10	11	Target 2	0.120165	0.000495513
10	A10	12	Target 2	0.128032	0.00554723
10	A10	13	Target 2	0.127019	0.00171894
10	A10	14	Target 2	0.128229	0.000114322
10	A10	15	Target 2	0.127822	-0.00310791
10	A10	16	Target 2	0.131533	-0.00221275
10	A10	17	Target 2	0.135646	-0.000914487
10	A10	18	Target 2	0.138247	-0.00112901
10	A10	19	Target 2	0.135344	-0.00684748
10	A10	20	Target 2	0.143194	-0.00181211
10	A10	21	Target 2	0.158835	0.0110132
10	A10	22	Target 2	0.178233	0.0275962
10	A10	23	Target 2	0.218402	0.06495
10	A10	24	Target 2	0.290951	0.134684
10	A10	25	Target 2	0.398912	0.239829
10	A10	26	Target 2	0.597483	0.435585
10	A10	27	Target 2	0.906261	0.741547
10	A10	28	Target 2	1.31809	1.15056
10	A10	29	Target 2	1.78766	1.61732
10	A10	30	Target 2	2.17663	2.00347
10	A10	31	Target 2	2.41557	2.23959
10	A10	32	Target 2	2.57227	2.39348
10	A10	33	Target 2	2.69119	2.50959
10	A10	34	Target 2	2.79212	2.6077
10	A10	35	Target 2	2.86406	2.67682
10	A10	36	Target 2	2.89939	2.70934
10	A10	37	Target 2	2.95569	2.76282
10	A10	38	Target 2	2.98349	2.78781
10	A10	39	Target 2	3.02112	2.82262
10	A10	40	Target 2	3.02533	2.82401
11	A11	1	Target 2	0.195056	-0.0528711
11	A11	2	Target 2	0.216828	-0.0339979
11	A11	3	Target 2	0.236781	-0.0169437
11	A11	4	Target 2	0.252555	-0.00406757
11	A11	5	Target 2	0.258439	-0.00108237
11	A11	6	Target 2	0.262401	-1.93258e-05
11	A11	7	Target 2	0.268671	0.00335203
11	A11	8	Target 2	0.275697	0.00747967
11	A11	9	Target 2	0.276475	0.00535881
11	A11	10	Target 2	0.288799	0.0147836
11	A11	11	Target 2	0.281743	0.00482969
11	A11	12	Target 2	0.281394	0.00158192
11	A11	13	Target 2	0.280259	-0.00245177
11	A11	14	Target 2	0.287632	0.00202253
11	A11	15	Target 2	0.297704	0.00919609
11	A11	16	Target 2	0.284239	-0.00716762
11	A11	17	Target 2	0.284753	-0.00955253
11	A11	18	Target 2	0.294291	-0.00291371
11	A11	19	Target 2	0.295697	-0.00440574
11	A11	20	Target 2	0.299317	-0.00368521
11	A11	21	Target 2	0.316134	0.0102333
11	A11	22	Target 2	0.334653	0.0258536
11	A11	23	Target 2	0.357555	0.0458575
11	A11	24	Target 2	0.426354	0.111758
11	A11	25	Target 2	0.52946	0.211965
11	A11	26	Target 2	0.720787	0.400393
11	A11	27	Target 2	1.00532	0.682029
11	A11	28	Target 2	1.4202	1.09401
11	A11	29	Target 2	1.87126	1.54217
11	A11	30	Target 2	2.24494	1.91296
11	A11	31	Target 2	2.48671	2.15182
11	A11	32	Target 2	2.63478	2.297
11	A11	33	Target 2	2.77483	2.43415
11	A11	34	Target 2	2.84308	2.49949
11	A11	35	Target 2	2.91787	2.57139
11	A11	36	Target 2	2.97251	2.62313
11	A11	37	Target 2	3.00858	2.6563
11	A11	38	Target 2	3.04072	2.68554
11	A11	39	Target 2	3.05831	2.70023
11	A11	40	Target 2	3.06354	2.70256
12	A12	1	Target 2	-0.19427	-0.0648296
12	A12	2	Target 2	-0.169205	-0.0453627
12	A12	3	Target 2	-0.134014	-0.0157693
12	A12	4	Target 2	-0.123546	-0.0109003
12	A12	5	Target 2	-0.106634	0.000414242
12	A12	6	Target 2	-0.108753	-0.00730355
12	A12	7	Target 2	-0.0898701	0.00598128
12	A12	8	Target 2	-0.0783903	0.0118629
12	A12	9	Target 2	-0.0785641	0.00609086
12	A12	10	Target 2	-0.0699866	0.00907013
12	A12	11	Target 2	-0.0642819	0.00917654
12	A12	12	Target 2	-0.0511355	0.0167247
12	A12	13	Target 2	-0.0636467	-0.00138477
12	A12	14	Target 2	-0.053611	0.00305273
12	A12	15	Target 2	-0.0413448	0.00972064
12	A12	16	Target 2	-0.058179	-0.0127118
12	A12	17	Target 2	-0.0482405	-0.00837147
12	A12	18	Target 2	-0.0525749	-0.0183042
12	A12	19	Target 2	-0.0279463	0.00072622
12	A12	20	Target 2	-0.0222102	0.000864097
12	A12	21	Target 2	-0.0164149	0.00106109
12	A12	22	Target 2	-0.00636279	0.005515
12	A12	23	Target 2	0.030745	0.0370245
12	A12	24	Target 2	0.108753	0.109434
12	A12	25	Target 2	0.216704	0.211787
12	A12	26	Target 2	0.377079	0.366564
12	A12	27	Target 2	0.700779	0.684666
12	A12	28	Target 2	1.11399	1.09228
12	A12	29	Target 2	1.54238	1.51507
12	A12	30	Target 2	1.94658	1.91367
12	A12	31	Target 2	2.17534	2.13684
12	A12	32	Target 2	2.33615	2.29205
12	A12	33	Target 2	2.454	2.4043
12	A12	34	Target 2	2.54554	2.49023
12	A12	35	Target 2	2.63368	2.57278
12	A12	36	Target 2	2.68644	2.61994
12	A12	37	Target 2	2.72438	2.65228
12	A12	38	Target 2	2.76004	2.68235
12	A12	39	Target 2	2.76472	2.68142
12	A12	40	Target 2	2.79136	2.70247
13	B1	1	Target 3	0.127468	-0.0285883
13	B1	2	Target 3	0.146974	-0.0111116
13	B1	3	Target 3	0.148989	-0.0111263
13	B1	4	Target 3	0.16253	0.000385056
13	B1	5	Target 3	0.162869	-0.00130526
13	B1	6	Target 3	0.160004	-0.00619997
13	B1	7	Target 3	0.176601	0.00836798
13	B1	8	Target 3	0.17358	0.00331757
13	B1	9	Target 3	0.175931	0.0036388
13	B1	10	Target 3	0.182729	0.00840764
13	B1	11	Target 3	0.182175	0.00582376
13	B1	12	Target 3	0.188066	0.00968533
13	B1	13	Target 3	0.176139	-0.00427122
13	B1	14	Target 3	0.185384	0.00294436
13	B1	15	Target 3	0.170463	-0.0140062
13	B1	16	Target 3	0.178792	-0.00770681
13	B1	17	Target 3	0.188503	-2.458e-05
13	B1	18	Target 3	0.188913	-0.00164416
13	B1	19	Target 3	0.195811	0.00322359
13	B1	20	Target 3	0.195107	0.000490431
13	B1	21	Target 3	0.200352	0.00370621
13	B1	22	Target 3	0.225296	0.0266204
13	B1	23	Target 3	0.271496	0.0707913
13	B1	24	Target 3	0.349611	0.146876
13	B1	25	Target 3	0.510918	0.306154
13	B1	26	Target 3	0.75501	0.548217
13	B1	27	Target 3	1.14556	0.936734
13	B1	28	Target 3	1.65957	1.44872
13	B1	29	Target 3	2.15241	1.93953
13	B1	30	Target 3	2.54443	2.32952
13	B1	31	Target 3	2.77159	2.55464
13	B1	32	Target 3	2.89831	2.67934
13	B1	33	Target 3	2.97493	2.75393
13	B1	34	Target 3	3.04214	2.81911
13	B1	35	Target 3	3.07751	2.85245
13	B1	36	Target 3	3.1045	2.87741
13	B1	37	Target 3	3.12134	2.89222
13	B1	38	Target 3	3.13626	2.90511
13	B1	39	Target 3	3.15648	2.9233
13	B1	40	Target 3	3.14941	2.91421
14	B2	1	Target 3	0.094017	-0.0217481
14	B2	2	Target 3	0.106898	-0.0101055
14	B2	3	Target 3	0.117613	-0.000628018
14	B2	4	Target 3	0.119818	0.000338815
14	B2	5	Target 3	0.112554	-0.00816294
14	B2	6	Target 3	0.120347	-0.00160823
14	B2	7	Target 3	0.128041	0.00484812
14	B2	8	Target 3	0.124641	0.000209815
14	B2	9	Target 3	0.13564	0.00997058
14	B2	10	Target 3	0.123487	-0.00342032
14	B2	11	Target 3	0.131034	0.0028888
14	B2	12	Target 3	0.131102	0.0017189
14	B2	13	Target 3	0.126154	-0.00446706
14	B2	14	Target 3	0.134739	0.0028796
14	B2	15	Target 3	0.127048	-0.00604913
14	B2	16	Target 3	0.139398	0.00506261
14	B2	17	Target 3	0.136171	0.000597923
14	B2	18	Target 3	0.132632	-0.00417945
14	B2	19	Target 3	0.137832	-0.000217436
14	B2	20	Target 3	0.147493	0.00820586
14	B2	21	Target 3	0.16236	0.0218341
14	B2	22	Target 3	0.185632	0.0438681
14	B2	23	Target 3	0.224355	0.0813533
14	B2	24	Target 3	0.312666	0.168427
14	B2	25	Target 3	0.464585	0.319107
14	B2	26	Target 3	0.731903	0.585187
14	B2	27	Target 3	1.14216	0.994202
14	B2	28	Target 3	1.6683	1.51911
14	B2	29	Target 3	2.19456	2.04413
14	B2	30	Target 3	2.60704	2.45537
14	B2	31	Target 3	2.86052	2.70761
14	B2	32	Target 3	2.99501	2.84086
14	B2	33	Target 3	3.09146	2.93608
14	B2	34	Target 3	3.13771	2.98109
14	B2	35	Target 3	3.18502	3.02716
14	B2	36	Target 3	3.22213	3.06304
14	B2	37	Target 3	3.23887	3.07854
14	B2	38	Target 3	3.24313	3.08156
14	B2	39	Target 3	3.26981	3.107
14	B2	40	Target 3	3.25681	3.09276
15	B3	1	Target 3	0.10191	-0.0245828
15	B3	2	Target 3	0.123984	-0.00444844
15	B3	3	Target 3	0.122332	-0.00803948
15	B3	4	Target 3	0.130253	-0.00205673
15	B3	5	Target 3	0.133929	-0.000320333
15	B3	6	Target 3	0.140547	0.00435919
15	B3	7	Target 3	0.14372	0.00559221
15	B3	8	Target 3	0.141756	0.00168957
15	B3	9	Target 3	0.146683	0.00467737
15	B3	10	Target 3	0.146511	0.00256615
15	B3	11	Target 3	0.145575	-0.00030843
15	B3	12	Target 3	0.151416	0.00359316
15	B3	13	Target 3	0.144765	-0.00499683
15	B3	14	Target 3	0.162074	0.0103734
15	B3	15	Target 3	0.145494	-0.00814565
15	B3	16	Target 3	0.148495	-0.00708363
15	B3	17	Target 3	0.15183	-0.00568784
15	B3	18	Target 3	0.145039	-0.0144184
15	B3	19	Target 3	0.166396	0.00500001
15	B3	20	Target 3	0.176541	0.0132063
15	B3	21	Target 3	0.181792	0.0165178
15	B3	22	Target 3	0.20938	0.0421673
15	B3	23	Target 3	0.248643	0.0794912
15	B3	24	Target 3	0.349552	0.17846
15	B3	25	Target 3	0.509442	0.336411
15	B3	26	Target 3	0.778518	0.603549
15	B3	27	Target 3	1.22462	1.04771
15	B3	28	Target 3	1.75634	1.57749
15	B3	29	Target 3	2.29663	2.11584
15	B3	30	Target 3	2.69976	2.51703
15	B3	31	Target 3	2.95526	2.77059
15	B3	32	Target 3	3.1056	2.919
15	B3	33	Target 3	3.17751	2.98896
15	B3	34	Target 3	3.25018	3.05969
15	B3	35	Target 3	3.29377	3.10134
15	B3	36	Target 3	3.30433	3.10998
15	B3	37	Target 3	3.33097	3.13467
15	B3	38	Target 3	3.35667	3.15843
15	B3	39	Target 3	3.36517	3.165
15	B3	40	Target 3	3.35407	3.15196
16	B4	1	Target 3	0.254337	-0.0372401
16	B4	2	Target 3	0.28564	-0.00940566
16	B4	3	Target 3	0.287081	-0.0114329
16	B4	4	Target 3	0.292731	-0.00925074
16	B4	5	Target 3	0.313324	0.0078731
16	B4	6	Target 3	0.318626	0.00970695
16	B4	7	Target 3	0.323547	0.0111595
16	B4	8	Target 3	0.317628	0.00177218
16	B4	9	Target 3	0.326329	0.00700486
16	B4	10	Target 3	0.319776	-0.0030166
16	B4	11	Target 3	0.319493	-0.00676801
16	B4	12	Target 3	0.325983	-0.00374687
16	B4	13	Target 3	0.335589	0.00239106
16	B4	14	Target 3	0.329997	-0.00666981
16	B4	15	Target 3	0.332593	-0.00754222
16	B4	16	Target 3	0.345075	0.00147133
16	B4	17	Target 3	0.35412	0.00704817
16	B4	18	Target 3	0.360144	0.0096035
16	B4	19	Target 3	0.395516	0.041507
16	B4	20	Target 3	0.447694	0.0902167
16	B4	21	Target 3	0.536181	0.175236
16	B4	22	Target 3	0.710853	0.346439
16	B4	23	Target 3	0.993288	0.625405
16	B4	24	Target 3	1.41548	1.04413
16	B4	25	Target 3	1.90327	1.52845
16	B4	26	Target 3	2.3728	1.99451
16	B4	27	Target 3	2.70677	2.32502
16	B4	28	Target 3	2.91893	2.5337
16	B4	29	Target 3	3.0141	2.6254
16	B4	30	Target 3	3.0941	2.70194
16	B4	31	Target 3	3.18244	2.78681
16	B4	32	Target 3	3.21056	2.81146
16	B4	33	Target 3	3.21584	2.81327
16	B4	34	Target 3	3.25661	2.85058
16	B4	35	Target 3	3.27065	2.86115
16	B4	36	Target 3	3.27546	2.86249
16	B4	37	Target 3	3.29338	2.87694
16	B4	38	Target 3	3.29519	2.87528
16	B4	39	Target 3	3.28321	2.85983
16	B4	40	Target 3	3.29618	2.86934
17	B5	1	Target 3	0.2031	-0.036195
17	B5	2	Target 3	0.231459	-0.0111643
17	B5	3	Target 3	0.24082	-0.00513183
17	B5	4	Target 3	0.246574	-0.00270652
17	B5	5	Target 3	0.25477	0.00216082
17	B5	6	Target 3	0.26025	0.00431247
17	B5	7	Target 3	0.259009	-0.000257359
17	B5	8	Target 3	0.265714	0.00311898
17	B5	9	Target 3	0.267809	0.0018855
17	B5	10	Target 3	0.270447	0.00119462
17	B5	11	Target 3	0.269558	-0.0030236
17	B5	12	Target 3	0.275864	-4.54453e-05
17	B5	13	Target 3	0.282017	0.00277854
17	B5	14	Target 3	0.283114	0.000546824
17	B5	15	Target 3	0.281063	-0.004833
17	B5	16	Target 3	0.287293	-0.00193096
17	B5	17	Target 3	0.301682	0.00912925
17	B5	18	Target 3	0.317131	0.021249
17	B5	19	Target 3	0.344982	0.0457718
17	B5	20	Target 3	0.400244	0.0977049
17	B5	21	Target 3	0.49448	0.188613
17	B5	22	Target 3	0.68398	0.374784
17	B5	23	Target 3	0.976281	0.663756
17	B5	24	Target 3	1.41613	1.10028
17	B5	25	Target 3	1.93984	1.62066
17	B5	26	Target 3	2.4333	2.11079
17	B5	27	Target 3	2.80531	2.47947
17	B5	28	Target 3	3.02094	2.69177
17	B5	29	Target 3	3.14741	2.81492
17	B5	30	Target 3	3.23665	2.90082
17	B5	31	Target 3	3.29563	2.95648
17	B5	32	Target 3	3.35674	3.01426
17	B5	33	Target 3	3.38777	3.04196
17	B5	34	Target 3	3.38369	3.03455
17	B5	35	Target 3	3.40282	3.05035
17	B5	36	Target 3	3.41895	3.06315
17	B5	37	Target 3	3.40791	3.04878
17	B5	38	Target 3	3.42969	3.06723
17	B5	39	Target 3	3.4323	3.06651
17	B5	40	Target 3	3.41044	3.04133
18	B6	1	Target 3	0.145494	-0.0332602
18	B6	2	Target 3	0.179665	-0.00232342
18	B6	3	Target 3	0.176798	-0.00842393
18	B6	4	Target 3	0.186375	-0.00208074
18	B6	5	Target 3	0.194946	0.00325676
18	B6	6	Target 3	0.198908	0.00398519
18	B6	7	Target 3	0.201318	0.0031615
18	B6	8	Target 3	0.204876	0.00348541
18	B6	9	Target 3	0.202739	-0.00188591
18	B6	10	Target 3	0.20664	-0.00121781
18	B6	11	Target 3	0.215271	0.0041795
18	B6	12	Target 3	0.216434	0.00210799
18	B6	13	Target 3	0.218495	0.000935666
18	B6	14	Target 3	0.218357	-0.00243671
18	B6	15	Target 3	0.219739	-0.0042878
18	B6	16	Target 3	0.226482	-0.000779106
18	B6	17	Target 3	0.236076	0.00558188
18	B6	18	Target 3	0.25559	0.0218616
18	B6	19	Target 3	0.284304	0.0473424
18	B6	20	Target 3	0.344379	0.104183
18	B6	21	Target 3	0.425437	0.182007
18	B6	22	Target 3	0.614018	0.367355
18	B6	23	Target 3	0.918741	0.668844
18	B6	24	Target 3	1.35713	1.104
18	B6	25	Target 3	1.8831	1.62673
18	B6	26	Target 3	2.38024	2.12064
18	B6	27	Target 3	2.75167	2.48883
18	B6	28	Target 3	2.96178	2.69572
18	B6	29	Target 3	3.07687	2.80757
18	B6	30	Target 3	3.17747	2.90493
18	B6	31	Target 3	3.21836	2.94259
18	B6	32	Target 3	3.2619	2.9829
18	B6	33	Target 3	3.30278	3.02054
18	B6	34	Target 3	3.33131	3.04584
18	B6	35	Target 3	3.34506	3.05636
18	B6	36	Target 3	3.3336	3.04167
18	B6	37	Target 3	3.34821	3.05304
18	B6	38	Target 3	3.35244	3.05404
18	B6	39	Target 3	3.34947	3.04783
18	B6	40	Target 3	3.34866	3.04379
19	B7	1	Target 4	0.17719	-0.0224733
19	B7	2	Target 4	0.18881	-0.0115803
19	B7	3	Target 4	0.199416	-0.00170013
19	B7	4	Target 4	0.189478	-0.0123648
19	B7	5	Target 4	0.197184	-0.00538605
19	B7	6	Target 4	0.198026	-0.00526995
19	B7	7	Target 4	0.211074	0.00705102
19	B7	8	Target 4	0.205975	0.00122535
19	B7	9	Target 4	0.207773	0.00229634
19	B7	10	Target 4	0.207532	0.00132884
19	B7	11	Target 4	0.211122	0.00419281
19	B7	12	Target 4	0.213651	0.00599487
19	B7	13	Target 4	0.210812	0.00242928
19	B7	14	Target 4	0.213574	0.00446466
19	B7	15	Target 4	0.214705	0.00486919
19	B7	16	Target 4	0.209258	-0.00130445
19	B7	17	Target 4	0.203348	-0.00794165
19	B7	18	Target 4	0.205747	-0.00626872
19	B7	19	Target 4	0.212052	-0.000690753
19	B7	20	Target 4	0.219134	0.00566485
19	B7	21	Target 4	0.216001	0.00180467
19	B7	22	Target 4	0.221549	0.006626
19	B7	23	Target 4	0.212702	-0.00294711
19	B7	24	Target 4	0.213149	-0.00322641
19	B7	25	Target 4	0.226287	0.00918404
19	B7	26	Target 4	0.218981	0.00115144
19	B7	27	Target 4	0.216624	-0.00193148
19	B7	28	Target 4	0.222891	0.00360903
19	B7	29	Target 4	0.21808	-0.00192906
19	B7	30	Target 4	0.216965	-0.00377084
19	B7	31	Target 4	0.218069	-0.00339381
19	B7	32	Target 4	0.221287	-0.000901639
19	B7	33	Target 4	0.229036	0.00611997
19	B7	34	Target 4	0.224413	0.000771167
19	B7	35	Target 4	0.221631	-0.00273819
19	B7	36	Target 4	0.227146	0.00205036
19	B7	37	Target 4	0.224316	-0.0015058
19	B7	38	Target 4	0.222442	-0.00410652
19	B7	39	Target 4	0.223819	-0.0034565
19	B7	40	Target 4	0.228142	0.000139736
20	B8	1	Target 4	0.123191	-0.0252622
20	B8	2	Target 4	0.136482	-0.0129163
20	B8	3	Target 4	0.141486	-0.00885713
20	B8	4	Target 4	0.150107	-0.00118113
20	B8	5	Target 4	0.147201	-0.00503224
20	B8	6	Target 4	0.159411	0.006233
20	B8	7	Target 4	0.150636	-0.0034869
20	B8	8	Target 4	0.147167	-0.00790067
20	B8	9	Target 4	0.163642	0.00762931
20	B8	10	Target 4	0.161442	0.00448417
20	B8	11	Target 4	0.165877	0.00797429
20	B8	12	Target 4	0.157266	-0.00158142
20	B8	13	Target 4	0.163614	0.00382088
20	B8	14	Target 4	0.155659	-0.00507896
20	B8	15	Target 4	0.155986	-0.00569704
20	B8	16	Target 4	0.162731	0.000103692
20	B8	17	Target 4	0.170285	0.00671276
20	B8	18	Target 4	0.159826	-0.00469115
20	B8	19	Target 4	0.171134	0.00567168
20	B8	20	Target 4	0.161421	-0.00498659
20	B8	21	Target 4	0.173778	0.00642591
20	B8	22	Target 4	0.165689	-0.0026084
20	B8	23	Target 4	0.172877	0.00363446
20	B8	24	Target 4	0.168268	-0.00191892
20	B8	25	Target 4	0.176363	0.00523142
20	B8	26	Target 4	0.170901	-0.00117593
20	B8	27	Target 4	0.177254	0.00423238
20	B8	28	Target 4	0.173902	-6.46212e-05
20	B8	29	Target 4	0.179026	0.00411445
20	B8	30	Target 4	0.175877	2.03395e-05
20	B8	31	Target 4	0.172055	-0.00474699
20	B8	32	Target 4	0.179	0.00125336
20	B8	33	Target 4	0.179491	0.000799274
20	B8	34	Target 4	0.182578	0.00294103
20	B8	35	Target 4	0.178772	-0.00180919
20	B8	36	Target 4	0.187013	0.0054862
20	B8	37	Target 4	0.180908	-0.00156351
20	B8	38	Target 4	0.173696	-0.00971986
20	B8	39	Target 4	0.179693	-0.00466798
20	B8	40	Target 4	0.184278	-0.00102824
21	B9	1	Target 4	0.0691821	-0.0288756
21	B9	2	Target 4	0.0891634	-0.00972383
21	B9	3	Target 4	0.0929479	-0.00676889
21	B9	4	Target 4	0.102908	0.00236179
21	B9	5	Target 4	0.0956326	-0.0057432
21	B9	6	Target 4	0.1087	0.00649478
21	B9	7	Target 4	0.107261	0.00422661
21	B9	8	Target 4	0.0987455	-0.00511888
21	B9	9	Target 4	0.109372	0.00467841
21	B9	10	Target 4	0.105294	-0.000229478
21	B9	11	Target 4	0.101055	-0.00529829
21	B9	12	Target 4	0.10566	-0.00152266
21	B9	13	Target 4	0.112372	0.0043603
21	B9	14	Target 4	0.104947	-0.00389457
21	B9	15	Target 4	0.107039	-0.00263175
21	B9	16	Target 4	0.111057	0.000556097
21	B9	17	Target 4	0.112962	0.00163216
21	B9	18	Target 4	0.113967	0.00180772
21	B9	19	Target 4	0.111121	-0.00186813
21	B9	20	Target 4	0.11494	0.0011209
21	B9	21	Target 4	0.114569	-7.95875e-05
21	B9	22	Target 4	0.109028	-0.00644987
21	B9	23	Target 4	0.112785	-0.00352181
21	B9	24	Target 4	0.120707	0.00357002
21	B9	25	Target 4	0.119874	0.00190758
21	B9	26	Target 4	0.117791	-0.00100434
21	B9	27	Target 4	0.129842	0.0102169
21	B9	28	Target 4	0.125413	0.00495825
21	B9	29	Target 4	0.12131	2.51636e-05
21	B9	30	Target 4	0.125981	0.00386741
21	B9	31	Target 4	0.131377	0.00843312
21	B9	32	Target 4	0.128761	0.00498785
21	B9	33	Target 4	0.131063	0.00646059
21	B9	34	Target 4	0.120166	-0.00526609
21	B9	35	Target 4	0.121711	-0.00455102
21	B9	36	Target 4	0.130347	0.00325555
21	B9	37	Target 4	0.121648	-0.00627302
21	B9	38	Target 4	0.120671	-0.00807958
21	B9	39	Target 4	0.12296	-0.00662007
21	B9	40	Target 4	0.119909	-0.0104999
22	B10	1	Target 4	0.207734	-0.0310723
22	B10	2	Target 4	0.229724	-0.0125697
22	B10	3	Target 4	0.232587	-0.0131935
22	B10	4	Target 4	0.251934	0.002666
22	B10	5	Target 4	0.251052	-0.00170345
22	B10	6	Target 4	0.263078	0.00683606
22	B10	7	Target 4	0.260852	0.00112214
22	B10	8	Target 4	0.269718	0.00650156
22	B10	9	Target 4	0.27147	0.00476616
22	B10	10	Target 4	0.267625	-0.00256582
22	B10	11	Target 4	0.282011	0.00833249
22	B10	12	Target 4	0.276978	-0.000186879
22	B10	13	Target 4	0.274299	-0.00635332
22	B10	14	Target 4	0.279632	-0.00450777
22	B10	15	Target 4	0.284846	-0.00278026
22	B10	16	Target 4	0.291942	0.000827834
22	B10	17	Target 4	0.29484	0.000238718
22	B10	18	Target 4	0.309917	0.0118289
22	B10	19	Target 4	0.342498	0.0409231
22	B10	20	Target 4	0.394943	0.0898804
22	B10	21	Target 4	0.477225	0.168675
22	B10	22	Target 4	0.649647	0.33761
22	B10	23	Target 4	0.918689	0.603166
22	B10	24	Target 4	1.33509	1.01608
22	B10	25	Target 4	1.84531	1.52281
22	B10	26	Target 4	2.34387	2.01788
22	B10	27	Target 4	2.69201	2.36254
22	B10	28	Target 4	2.88661	2.55365
22	B10	29	Target 4	3.01288	2.67643
22	B10	30	Target 4	3.09367	2.75374
22	B10	31	Target 4	3.17229	2.82887
22	B10	32	Target 4	3.20522	2.85831
22	B10	33	Target 4	3.23754	2.88715
22	B10	34	Target 4	3.26546	2.91158
22	B10	35	Target 4	3.28411	2.92674
22	B10	36	Target 4	3.286	2.92515
22	B10	37	Target 4	3.2893	2.92496
22	B10	38	Target 4	3.31417	2.94634
22	B10	39	Target 4	3.3058	2.93448
22	B10	40	Target 4	3.31832	2.94351
23	B11	1	Target 4	0.189326	-0.0252307
23	B11	2	Target 4	0.199123	-0.0191963
23	B11	3	Target 4	0.217025	-0.00505774
23	B11	4	Target 4	0.223845	-0.00200063
23	B11	5	Target 4	0.229341	-0.000267742
23	B11	6	Target 4	0.237246	0.00387395
23	B11	7	Target 4	0.240939	0.00380408
23	B11	8	Target 4	0.244023	0.00312514
23	B11	9	Target 4	0.243836	-0.00082581
23	B11	10	Target 4	0.236809	-0.0116154
23	B11	11	Target 4	0.258857	0.00666917
23	B11	12	Target 4	0.25623	0.000279104
23	B11	13	Target 4	0.264023	0.00430892
23	B11	14	Target 4	0.274924	0.0114467
23	B11	15	Target 4	0.2606	-0.00664027
23	B11	16	Target 4	0.270461	-0.000542297
23	B11	17	Target 4	0.268209	-0.00655712
23	B11	18	Target 4	0.288607	0.0100776
23	B11	19	Target 4	0.322491	0.0401982
23	B11	20	Target 4	0.369901	0.0838457
23	B11	21	Target 4	0.446207	0.156388
23	B11	22	Target 4	0.59832	0.304738
23	B11	23	Target 4	0.854893	0.557548
23	B11	24	Target 4	1.25161	0.950501
23	B11	25	Target 4	1.7334	1.42853
23	B11	26	Target 4	2.22909	1.92046
23	B11	27	Target 4	2.58609	2.27369
23	B11	28	Target 4	2.81338	2.49722
23	B11	29	Target 4	2.92355	2.60363
23	B11	30	Target 4	3.00465	2.68096
23	B11	31	Target 4	3.06678	2.73933
23	B11	32	Target 4	3.14128	2.81007
23	B11	33	Target 4	3.18214	2.84716
23	B11	34	Target 4	3.18528	2.84654
23	B11	35	Target 4	3.19548	2.85298
23	B11	36	Target 4	3.20391	2.85764
23	B11	37	Target 4	3.21734	2.86731
23	B11	38	Target 4	3.21933	2.86554
23	B11	39	Target 4	3.22459	2.86703
23	B11	40	Target 4	3.24514	2.88382
24	B12	1	Target 4	0.150101	-0.0416464
24	B12	2	Target 4	0.181377	-0.0137991
24	B12	3	Target 4	0.191534	-0.00706989
24	B12	4	Target 4	0.197693	-0.00433934
24	B12	5	Target 4	0.214892	0.00943096
24	B12	6	Target 4	0.207608	-0.00128088
24	B12	7	Target 4	0.207932	-0.00438556
24	B12	8	Target 4	0.221349	0.00560332
24	B12	9	Target 4	0.215866	-0.00330772
24	B12	10	Target 4	0.230474	0.00787246
24	B12	11	Target 4	0.229766	0.00373574
24	B12	12	Target 4	0.228357	-0.00110158
24	B12	13	Target 4	0.243683	0.0107963
24	B12	14	Target 4	0.230536	-0.00577943
24	B12	15	Target 4	0.228252	-0.0114908
24	B12	16	Target 4	0.244488	0.0013164
24	B12	17	Target 4	0.245669	-0.000930516
24	B12	18	Target 4	0.268965	0.0189373
24	B12	19	Target 4	0.287013	0.0335566
24	B12	20	Target 4	0.343634	0.0867496
24	B12	21	Target 4	0.408099	0.147786
24	B12	22	Target 4	0.557882	0.294141
24	B12	23	Target 4	0.807089	0.53992
24	B12	24	Target 4	1.18034	0.909741
24	B12	25	Target 4	1.65308	1.37906
24	B12	26	Target 4	2.13354	1.85608
24	B12	27	Target 4	2.48225	2.20137
24	B12	28	Target 4	2.68756	2.40325
24	B12	29	Target 4	2.8024	2.51467
24	B12	30	Target 4	2.9093	2.61813
24	B12	31	Target 4	2.94616	2.65156
24	B12	32	Target 4	3.00743	2.70941
24	B12	33	Target 4	3.04542	2.74397
24	B12	34	Target 4	3.07965	2.77477
24	B12	35	Target 4	3.07771	2.7694
24	B12	36	Target 4	3.0792	2.76746
24	B12	37	Target 4	3.10113	2.78597
24	B12	38	Target 4	3.10362	2.78503
24	B12	39	Target 4	3.10976	2.78774
24	B12	40	Target 4	3.10038	2.77493
25	C1	1	Target 5	0.110723	-0.0199328
25	C1	2	Target 5	0.123822	-0.00549287
25	C1	3	Target 5	0.126397	-0.00157681
25	C1	4	Target 5	0.119355	-0.007278
25	C1	5	Target 5	0.138485	0.0131924
25	C1	6	Target 5	0.124221	0.000268997
25	C1	7	Target 5	0.126002	0.00339111
25	C1	8	Target 5	0.112344	-0.00892608
25	C1	9	Target 5	0.129839	0.00991001
25	C1	10	Target 5	0.121929	0.00334129
25	C1	11	Target 5	0.11316	-0.00408685
25	C1	12	Target 5	0.119006	0.00309944
25	C1	13	Target 5	0.106495	-0.00807074
25	C1	14	Target 5	0.111303	-0.0019218
25	C1	15	Target 5	0.108984	-0.00290002
25	C1	16	Target 5	0.113086	0.0025433
25	C1	17	Target 5	0.0981227	-0.0110794
25	C1	18	Target 5	0.115056	0.00719485
25	C1	19	Target 5	0.101106	-0.00541451
25	C1	20	Target 5	0.107832	0.0026525
25	C1	21	Target 5	0.0995632	-0.0042754
25	C1	22	Target 5	0.104611	0.00211347
25	C1	23	Target 5	0.103207	0.00205028
25	C1	24	Target 5	0.105588	0.00577198
25	C1	25	Target 5	0.106233	0.00775759
25	C1	26	Target 5	0.122916	0.0257818
25	C1	27	Target 5	0.125271	0.0294774
25	C1	28	Target 5	0.141781	0.0473286
25	C1	29	Target 5	0.189151	0.0960393
25	C1	30	Target 5	0.271722	0.179951
25	C1	31	Target 5	0.404422	0.313992
25	C1	32	Target 5	0.650016	0.560927
25	C1	33	Target 5	1.01157	0.923825
25	C1	34	Target 5	1.48225	1.39584
25	C1	35	Target 5	1.89595	1.81088
25	C1	36	Target 5	2.13366	2.04993
25	C1	37	Target 5	2.25055	2.16817
25	C1	38	Target 5	2.36041	2.27937
25	C1	39	Target 5	2.47133	2.39162
25	C1	40	Target 5	2.56584	2.48748
26	C2	1	Target 5	0.13138	-0.0180381
26	C2	2	Target 5	0.139323	-0.00913933
26	C2	3	Target 5	0.147402	-0.000103267
26	C2	4	Target 5	0.143137	-0.00341134
26	C2	5	Target 5	0.148452	0.00285988
26	C2	6	Target 5	0.155857	0.0112216
26	C2	7	Target 5	0.139413	-0.00426617
26	C2	8	Target 5	0.142147	-0.000575795
26	C2	9	Target 5	0.142733	0.000967232
26	C2	10	Target 5	0.145135	0.00432604
26	C2	11	Target 5	0.138198	-0.00165499
26	C2	12	Target 5	0.141411	0.00251449
26	C2	13	Target 5	0.139008	0.00106831
26	C2	14	Target 5	0.131212	-0.00577101
26	C2	15	Target 5	0.137994	0.0019671
26	C2	16	Target 5	0.130333	-0.00473634
26	C2	17	Target 5	0.121376	-0.0127369
26	C2	18	Target 5	0.141537	0.00838015
26	C2	19	Target 5	0.119269	-0.0129313
26	C2	20	Target 5	0.128151	-0.00309209
26	C2	21	Target 5	0.134938	0.00465093
26	C2	22	Target 5	0.129821	0.00049017
26	C2	23	Target 5	0.118472	-0.00990156
26	C2	24	Target 5	0.137243	0.00982583
26	C2	25	Target 5	0.13737	0.010909
26	C2	26	Target 5	0.146922	0.0214176
26	C2	27	Target 5	0.152073	0.0275252
26	C2	28	Target 5	0.179956	0.0563648
26	C2	29	Target 5	0.231986	0.109352
26	C2	30	Target 5	0.329725	0.208047
26	C2	31	Target 5	0.490303	0.369582
26	C2	32	Target 5	0.779782	0.660017
26	C2	33	Target 5	1.18988	1.07107
26	C2	34	Target 5	1.65468	1.53683
26	C2	35	Target 5	1.96397	1.84708
26	C2	36	Target 5	2.09939	1.98345
26	C2	37	Target 5	2.20673	2.09174
26	C2	38	Target 5	2.30215	2.18813
26	C2	39	Target 5	2.41983	2.30676
26	C2	40	Target 5	2.51346	2.40134
27	C3	1	Target 5	0.203411	-0.0158383
27	C3	2	Target 5	0.209627	-0.0084059
27	C3	3	Target 5	0.215456	-0.00136081
27	C3	4	Target 5	0.213338	-0.00226347
27	C3	5	Target 5	0.222314	0.00792832
27	C3	6	Target 5	0.21859	0.00542036
27	C3	7	Target 5	0.211432	-0.000521744
27	C3	8	Target 5	0.211927	0.00118903
27	C3	9	Target 5	0.214868	0.00534584
27	C3	10	Target 5	0.211532	0.00322535
27	C3	11	Target 5	0.203326	-0.00376499
27	C3	12	Target 5	0.207616	0.00174113
27	C3	13	Target 5	0.20385	-0.000809363
27	C3	14	Target 5	0.200222	-0.00322166
27	C3	15	Target 5	0.196702	-0.00552551
27	C3	16	Target 5	0.195308	-0.00570353
27	C3	17	Target 5	0.201333	0.00153632
27	C3	18	Target 5	0.191307	-0.00727325
27	C3	19	Target 5	0.187779	-0.00958574
27	C3	20	Target 5	0.190766	-0.00538242
27	C3	21	Target 5	0.196724	0.00179123
27	C3	22	Target 5	0.190552	-0.00316522
27	C3	23	Target 5	0.189758	-0.00274329
27	C3	24	Target 5	0.190393	-0.000892423
27	C3	25	Target 5	0.198858	0.00878846
27	C3	26	Target 5	0.204101	0.0152474
27	C3	27	Target 5	0.207437	0.0197991
27	C3	28	Target 5	0.23189	0.0454675
27	C3	29	Target 5	0.263333	0.0781265
27	C3	30	Target 5	0.334461	0.15047
27	C3	31	Target 5	0.451867	0.269092
27	C3	32	Target 5	0.674959	0.4934
27	C3	33	Target 5	0.996402	0.816058
27	C3	34	Target 5	1.44808	1.26895
27	C3	35	Target 5	1.92123	1.74332
27	C3	36	Target 5	2.24748	2.07078
27	C3	37	Target 5	2.39154	2.21606
27	C3	38	Target 5	2.51371	2.33945
27	C3	39	Target 5	2.60698	2.43393
27	C3	40	Target 5	2.71236	2.54053
28	C4	1	Target 5	0.332038	-0.0316201
28	C4	2	Target 5	0.349685	-0.0117632
28	C4	3	Target 5	0.356881	-0.0023568
28	C4	4	Target 5	0.354529	-0.00249804
28	C4	5	Target 5	0.351919	-0.00289853
28	C4	6	Target 5	0.35527	0.00266282
28	C4	7	Target 5	0.351499	0.00110216
28	C4	8	Target 5	0.347206	-0.000980637
28	C4	9	Target 5	0.348309	0.0023329
28	C4	10	Target 5	0.345551	0.00178439
28	C4	11	Target 5	0.347478	0.00592202
28	C4	12	Target 5	0.343293	0.00394731
28	C4	13	Target 5	0.327107	-0.0100291
28	C4	14	Target 5	0.338397	0.00347127
28	C4	15	Target 5	0.336299	0.00358419
28	C4	16	Target 5	0.331726	0.00122143
28	C4	17	Target 5	0.324685	-0.00361004
28	C4	18	Target 5	0.322429	-0.00365534
28	C4	19	Target 5	0.316797	-0.00707695
28	C4	20	Target 5	0.334942	0.0132779
28	C4	21	Target 5	0.329613	0.0101591
28	C4	22	Target 5	0.345677	0.0284327
28	C4	23	Target 5	0.337975	0.0229415
28	C4	24	Target 5	0.365772	0.0529481
28	C4	25	Target 5	0.410636	0.100023
28	C4	26	Target 5	0.483119	0.174716
28	C4	27	Target 5	0.622925	0.316732
28	C4	28	Target 5	0.865764	0.561782
28	C4	29	Target 5	1.22472	0.922948
28	C4	30	Target 5	1.68675	1.38719
28	C4	31	Target 5	2.09603	1.79867
28	C4	32	Target 5	2.29057	1.99543
28	C4	33	Target 5	2.42255	2.12961
28	C4	34	Target 5	2.53271	2.24199
28	C4	35	Target 5	2.63272	2.34421
28	C4	36	Target 5	2.71675	2.43045
28	C4	37	Target 5	2.80428	2.52019
28	C4	38	Target 5	2.85378	2.5719
28	C4	39	Target 5	2.92472	2.64505
28	C4	40	Target 5	2.94979	2.67233
29	C5	1	Target 5	0.333232	-0.0233839
29	C5	2	Target 5	0.341773	-0.0130821
29	C5	3	Target 5	0.348077	-0.00501627
29	C5	4	Target 5	0.351215	-0.000115787
29	C5	5	Target 5	0.35386	0.00429081
29	C5	6	Target 5	0.344845	-0.00296326
29	C5	7	Target 5	0.347311	0.00126488
29	C5	8	Target 5	0.346509	0.00222403
29	C5	9	Target 5	0.342296	-0.000226915
29	C5	10	Target 5	0.343509	0.00274842
29	C5	11	Target 5	0.3345	-0.0044998
29	C5	12	Target 5	0.337822	0.000584438
29	C5	13	Target 5	0.338154	0.00267843
29	C5	14	Target 5	0.339704	0.00599015
29	C5	15	Target 5	0.326155	-0.00579751
29	C5	16	Target 5	0.332006	0.00181531
29	C5	17	Target 5	0.324213	-0.00421635
29	C5	18	Target 5	0.329808	0.00314082
29	C5	19	Target 5	0.330265	0.00535912
29	C5	20	Target 5	0.315884	-0.00726053
29	C5	21	Target 5	0.323029	0.00164649
29	C5	22	Target 5	0.335838	0.0162176
29	C5	23	Target 5	0.342242	0.0243827
29	C5	24	Target 5	0.373195	0.0570974
29	C5	25	Target 5	0.418756	0.10442
29	C5	26	Target 5	0.50447	0.191896
29	C5	27	Target 5	0.659552	0.34874
29	C5	28	Target 5	0.910341	0.60129
29	C5	29	Target 5	1.30578	0.998493
29	C5	30	Target 5	1.78604	1.48051
29	C5	31	Target 5	2.19487	1.89111
29	C5	32	Target 5	2.39788	2.09587
29	C5	33	Target 5	2.51829	2.21804
29	C5	34	Target 5	2.63583	2.33735
29	C5	35	Target 5	2.71582	2.41911
29	C5	36	Target 5	2.81351	2.51855
29	C5	37	Target 5	2.89548	2.60229
29	C5	38	Target 5	2.94566	2.65423
29	C5	39	Target 5	2.99147	2.7018
29	C5	40	Target 5	3.05127	2.76336
30	C6	1	Target 5	0.555183	-0.0336239
30	C6	2	Target 5	0.574964	-0.0127602
30	C6	3	Target 5	0.583204	-0.0034362
30	C6	4	Target 5	0.588737	0.00317931
30	C6	5	Target 5	0.577488	-0.00698644
30	C6	6	Target 5	0.585068	0.00167721
30	C6	7	Target 5	0.590664	0.00835615
30	C6	8	Target 5	0.581493	0.000268155
30	C6	9	Target 5	0.579269	-0.0008728
30	C6	10	Target 5	0.578322	-0.000736188
30	C6	11	Target 5	0.580608	0.00263278
30	C6	12	Target 5	0.578341	0.00144963
30	C6	13	Target 5	0.577648	0.00183884
30	C6	14	Target 5	0.57344	-0.00128563
30	C6	15	Target 5	0.570412	-0.00322988
30	C6	16	Target 5	0.571945	-0.000614191
30	C6	17	Target 5	0.566914	-0.00456193
30	C6	18	Target 5	0.563499	-0.00689325
30	C6	19	Target 5	0.570748	0.00143888
30	C6	20	Target 5	0.574168	0.00594177
30	C6	21	Target 5	0.568977	0.00183376
30	C6	22	Target 5	0.579744	0.0136838
30	C6	23	Target 5	0.585622	0.0206451
30	C6	24	Target 5	0.608583	0.0446894
30	C6	25	Target 5	0.655147	0.0923363
30	C6	26	Target 5	0.721925	0.160198
30	C6	27	Target 5	0.867312	0.306668
30	C6	28	Target 5	1.10111	0.541551
30	C6	29	Target 5	1.46046	0.901984
30	C6	30	Target 5	1.90618	1.34879
30	C6	31	Target 5	2.27803	1.72172
30	C6	32	Target 5	2.46359	1.90837
30	C6	33	Target 5	2.58234	2.02819
30	C6	34	Target 5	2.69474	2.14167
30	C6	35	Target 5	2.77831	2.22633
30	C6	36	Target 5	2.89114	2.34024
30	C6	37	Target 5	2.96042	2.41061
30	C6	38	Target 5	3.00026	2.45153
30	C6	39	Target 5	3.05501	2.50737
30	C6	40	Target 5	3.10005	2.55349
31	C7	1	Target 6	0.144992	-0.0271842
31	C7	2	Target 6	0.162704	-0.0111948
31	C7	3	Target 6	0.169883	-0.00573875
31	C7	4	Target 6	0.17896	0.00161487
31	C7	5	Target 6	0.182647	0.00357929
31	C7	6	Target 6	0.180246	-0.000544502
31	C7	7	Target 6	0.187996	0.00548312
31	C7	8	Target 6	0.183925	-0.000310715
31	C7	9	Target 6	0.192304	0.00634525
31	C7	10	Target 6	0.186386	-0.00129631
31	C7	11	Target 6	0.184003	-0.00540178
31	C7	12	Target 6	0.187598	-0.00352936
31	C7	13	Target 6	0.19509	0.00223918
31	C7	14	Target 6	0.189738	-0.00483531
31	C7	15	Target 6	0.193627	-0.00266908
31	C7	16	Target 6	0.199759	0.00173993
31	C7	17	Target 6	0.195823	-0.00391835
31	C7	18	Target 6	0.203819	0.00235467
31	C7	19	Target 6	0.208075	0.00488785
31	C7	20	Target 6	0.21418	0.00926982
31	C7	21	Target 6	0.235307	0.0286744
31	C7	22	Target 6	0.271785	0.063429
31	C7	23	Target 6	0.327426	0.117347
31	C7	24	Target 6	0.438866	0.227064
31	C7	25	Target 6	0.631844	0.41832
31	C7	26	Target 6	0.942047	0.7268
31	C7	27	Target 6	1.36411	1.14714
31	C7	28	Target 6	1.79903	1.58034
31	C7	29	Target 6	2.1298	1.90938
31	C7	30	Target 6	2.32685	2.10472
31	C7	31	Target 6	2.46402	2.24016
31	C7	32	Target 6	2.59139	2.3658
31	C7	33	Target 6	2.6896	2.46229
31	C7	34	Target 6	2.73798	2.50895
31	C7	35	Target 6	2.77858	2.54782
31	C7	36	Target 6	2.81763	2.58515
31	C7	37	Target 6	2.84233	2.60814
31	C7	38	Target 6	2.84318	2.60726
31	C7	39	Target 6	2.8726	2.63495
31	C7	40	Target 6	2.86755	2.62818
32	C8	1	Target 6	0.100383	-0.0246834
32	C8	2	Target 6	0.122069	-0.00444591
32	C8	3	Target 6	0.125917	-0.0020456
32	C8	4	Target 6	0.122889	-0.00652171
32	C8	5	Target 6	0.133081	0.00222135
32	C8	6	Target 6	0.132765	0.000457585
32	C8	7	Target 6	0.1393	0.00554391
32	C8	8	Target 6	0.133824	-0.00138018
32	C8	9	Target 6	0.141712	0.00505951
32	C8	10	Target 6	0.134382	-0.00371802
32	C8	11	Target 6	0.138836	-0.000712641
32	C8	12	Target 6	0.14681	0.00581277
32	C8	13	Target 6	0.140003	-0.00244239
32	C8	14	Target 6	0.149291	0.00539751
32	C8	15	Target 6	0.140021	-0.00532011
32	C8	16	Target 6	0.150483	0.00369294
32	C8	17	Target 6	0.142193	-0.0060449
32	C8	18	Target 6	0.154845	0.00515904
32	C8	19	Target 6	0.155135	0.00400084
32	C8	20	Target 6	0.169865	0.0172823
32	C8	21	Target 6	0.189154	0.0351235
32	C8	22	Target 6	0.223559	0.0680796
32	C8	23	Target 6	0.294427	0.137499
32	C8	24	Target 6	0.423988	0.265613
32	C8	25	Target 6	0.648034	0.488211
32	C8	26	Target 6	0.99753	0.836258
32	C8	27	Target 6	1.4787	1.31598
32	C8	28	Target 6	2.01418	1.85001
32	C8	29	Target 6	2.43949	2.27387
32	C8	30	Target 6	2.6991	2.53203
32	C8	31	Target 6	2.85315	2.68464
32	C8	32	Target 6	3.00447	2.83451
32	C8	33	Target 6	3.13734	2.96593
32	C8	34	Target 6	3.20954	3.03668
32	C8	35	Target 6	3.24645	3.07214
32	C8	36	Target 6	3.29183	3.11607
32	C8	37	Target 6	3.30775	3.13054
32	C8	38	Target 6	3.3314	3.15275
32	C8	39	Target 6	3.34212	3.16202
32	C8	40	Target 6	3.36135	3.17981
33	C9	1	Target 6	0.122368	-0.0115295
33	C9	2	Target 6	0.134049	-0.00159196
33	C9	3	Target 6	0.139063	0.00167871
33	C9	4	Target 6	0.140299	0.00117133
33	C9	5	Target 6	0.144847	0.00397615
33	C9	6	Target 6	0.141994	-0.00062054
33	C9	7	Target 6	0.144029	-0.00032941
33	C9	8	Target 6	0.143712	-0.00239032
33	C9	9	Target 6	0.148179	0.000333778
33	C9	10	Target 6	0.147464	-0.00212555
33	C9	11	Target 6	0.150744	-0.000588741
33	C9	12	Target 6	0.149991	-0.00308507
33	C9	13	Target 6	0.153562	-0.00125776
33	C9	14	Target 6	0.155318	-0.00124546
33	C9	15	Target 6	0.153377	-0.00492951
33	C9	16	Target 6	0.162087	0.00203692
33	C9	17	Target 6	0.16406	0.00226643
33	C9	18	Target 6	0.166702	0.00316402
33	C9	19	Target 6	0.167226	0.00194503
33	C9	20	Target 6	0.179039	0.0120143
33	C9	21	Target 6	0.199552	0.0307841
33	C9	22	Target 6	0.234203	0.0636916
33	C9	23	Target 6	0.30139	0.129134
33	C9	24	Target 6	0.429205	0.255206
33	C9	25	Target 6	0.641579	0.465836
33	C9	26	Target 6	1.00102	0.823538
33	C9	27	Target 6	1.49136	1.31213
33	C9	28	Target 6	2.00449	1.82352
33	C9	29	Target 6	2.41506	2.23234
33	C9	30	Target 6	2.66886	2.4844
33	C9	31	Target 6	2.82928	2.64308
33	C9	32	Target 6	3	2.81205
33	C9	33	Target 6	3.08802	2.89832
33	C9	34	Target 6	3.17615	2.98471
33	C9	35	Target 6	3.21499	3.02181
33	C9	36	Target 6	3.24957	3.05465
33	C9	37	Target 6	3.28936	3.0927
33	C9	38	Target 6	3.31599	3.11758
33	C9	39	Target 6	3.28879	3.08864
33	C9	40	Target 6	3.31108	3.10919
34	C10	1	Target 6	-1.07264	-0.128395
34	C10	2	Target 6	-0.982018	-0.0471493
34	C10	3	Target 6	-0.95001	-0.0245226
34	C10	4	Target 6	-0.922204	-0.00609827
34	C10	5	Target 6	-0.903723	0.00300099
34	C10	6	Target 6	-0.89997	-0.00262704
34	C10	7	Target 6	-0.87293	0.0150322
34	C10	8	Target 6	-0.865452	0.0131291
34	C10	9	Target 6	-0.862604	0.00659545
34	C10	10	Target 6	-0.851857	0.00796143
34	C10	11	Target 6	-0.832186	0.0182507
34	C10	12	Target 6	-0.84805	-0.00699418
34	C10	13	Target 6	-0.839417	-0.00774232
34	C10	14	Target 6	-0.814826	0.00746701
34	C10	15	Target 6	-0.826296	-0.0133839
34	C10	16	Target 6	-0.804225	-0.000694445
34	C10	17	Target 6	-0.803523	-0.00937406
34	C10	18	Target 6	-0.789977	-0.00520965
34	C10	19	Target 6	-0.753973	0.0214133
34	C10	20	Target 6	-0.712681	0.0533245
34	C10	21	Target 6	-0.623862	0.132762
34	C10	22	Target 6	-0.455601	0.291642
34	C10	23	Target 6	-0.183689	0.554172
34	C10	24	Target 6	0.314408	1.04289
34	C10	25	Target 6	1.03305	1.75215
34	C10	26	Target 6	1.94499	2.65471
34	C10	27	Target 6	2.73288	3.43322
34	C10	28	Target 6	3.28705	3.97801
34	C10	29	Target 6	3.58344	4.26502
34	C10	30	Target 6	3.85764	4.52983
34	C10	31	Target 6	4.05054	4.71335
34	C10	32	Target 6	4.19324	4.84667
34	C10	33	Target 6	4.30266	4.94671
34	C10	34	Target 6	4.40951	5.04418
34	C10	35	Target 6	4.44103	5.06632
34	C10	36	Target 6	4.51714	5.13305
34	C10	37	Target 6	4.53192	5.13844
34	C10	38	Target 6	4.5632	5.16034
34	C10	39	Target 6	4.57677	5.16453
34	C10	40	Target 6	4.57582	5.1542
35	C11	1	Target 6	0.172558	-0.0606874
35	C11	2	Target 6	0.211519	-0.0244954
35	C11	3	Target 6	0.232998	-0.00578558
35	C11	4	Target 6	0.226919	-0.014633
35	C11	5	Target 6	0.248993	0.00467127
35	C11	6	Target 6	0.252738	0.00564733
35	C11	7	Target 6	0.25395	0.00409084
35	C11	8	Target 6	0.259212	0.00658369
35	C11	9	Target 6	0.26255	0.00715309
35	C11	10	Target 6	0.255955	-0.00221106
35	C11	11	Target 6	0.264363	0.00342736
35	C11	12	Target 6	0.266381	0.00267679
35	C11	13	Target 6	0.26346	-0.00301316
35	C11	14	Target 6	0.270128	0.000885761
35	C11	15	Target 6	0.268094	-0.00391679
35	C11	16	Target 6	0.269203	-0.00557651
35	C11	17	Target 6	0.272656	-0.00489302
35	C11	18	Target 6	0.298952	0.0186343
35	C11	19	Target 6	0.294186	0.0110994
35	C11	20	Target 6	0.326701	0.0408447
35	C11	21	Target 6	0.368731	0.0801063
35	C11	22	Target 6	0.447721	0.156327
35	C11	23	Target 6	0.612565	0.318403
35	C11	24	Target 6	0.858805	0.561873
35	C11	25	Target 6	1.23498	0.935278
35	C11	26	Target 6	1.70558	1.40311
35	C11	27	Target 6	2.12952	1.82428
35	C11	28	Target 6	2.42611	2.1181
35	C11	29	Target 6	2.59707	2.28629
35	C11	30	Target 6	2.74034	2.4268
35	C11	31	Target 6	2.86861	2.5523
35	C11	32	Target 6	2.93165	2.61257
35	C11	33	Target 6	2.99312	2.67127
35	C11	34	Target 6	3.04237	2.71775
35	C11	35	Target 6	3.04852	2.72113
35	C11	36	Target 6	3.08701	2.75685
35	C11	37	Target 6	3.1241	2.79117
35	C11	38	Target 6	3.12357	2.78787
35	C11	39	Target 6	3.13949	2.80102
35	C11	40	Target 6	3.16251	2.82127
36	C12	1	Target 6	0.139596	-0.0502649
36	C12	2	Target 6	0.167786	-0.0256558
36	C12	3	Target 6	0.189208	-0.00781401
36	C12	4	Target 6	0.191154	-0.00944885
36	C12	5	Target 6	0.210107	0.00592374
36	C12	6	Target 6	0.208374	0.000610449
36	C12	7	Target 6	0.222801	0.011457
36	C12	8	Target 6	0.206868	-0.00805703
36	C12	9	Target 6	0.233379	0.014873
36	C12	10	Target 6	0.221398	-0.000688235
36	C12	11	Target 6	0.229515	0.00384889
36	C12	12	Target 6	0.231478	0.00223121
36	C12	13	Target 6	0.229767	-0.00306104
36	C12	14	Target 6	0.236023	-0.000384836
36	C12	15	Target 6	0.238632	-0.00135634
36	C12	16	Target 6	0.231053	-0.0125163
36	C12	17	Target 6	0.243995	-0.00315519
36	C12	18	Target 6	0.258392	0.00766134
36	C12	19	Target 6	0.254187	-0.000123827
36	C12	20	Target 6	0.274343	0.0164512
36	C12	21	Target 6	0.333207	0.0717354
36	C12	22	Target 6	0.410265	0.145212
36	C12	23	Target 6	0.559404	0.290771
36	C12	24	Target 6	0.788312	0.516098
36	C12	25	Target 6	1.15953	0.883738
36	C12	26	Target 6	1.61006	1.33069
36	C12	27	Target 6	2.03995	1.75699
36	C12	28	Target 6	2.34756	2.06103
36	C12	29	Target 6	2.51602	2.22591
36	C12	30	Target 6	2.67413	2.38043
36	C12	31	Target 6	2.77948	2.4822
36	C12	32	Target 6	2.86853	2.56768
36	C12	33	Target 6	2.93811	2.63367
36	C12	34	Target 6	2.96708	2.65907
36	C12	35	Target 6	2.97595	2.66435
36	C12	36	Target 6	3.02104	2.70586
36	C12	37	Target 6	3.04575	2.72699
36	C12	38	Target 6	3.03724	2.7149
36	C12	39	Target 6	3.08463	2.7587
36	C12	40	Target 6	3.07111	2.74161
37	D1	1	Target 7	0.133031	-0.0246667
37	D1	2	Target 7	0.154133	-0.0051256
37	D1	3	Target 7	0.15498	-0.00584019
37	D1	4	Target 7	0.155977	-0.00640458
37	D1	5	Target 7	0.165686	0.00174278
37	D1	6	Target 7	0.172533	0.00702859
37	D1	7	Target 7	0.163776	-0.00328913
37	D1	8	Target 7	0.170225	0.0015986
37	D1	9	Target 7	0.177906	0.00771756
37	D1	10	Target 7	0.165086	-0.00666307
37	D1	11	Target 7	0.175748	0.0024372
37	D1	12	Target 7	0.181174	0.00630213
37	D1	13	Target 7	0.179972	0.00353838
37	D1	14	Target 7	0.174169	-0.00382594
37	D1	15	Target 7	0.180572	0.00101584
37	D1	16	Target 7	0.185183	0.00406561
37	D1	17	Target 7	0.180779	-0.00189926
37	D1	18	Target 7	0.178936	-0.00530341
37	D1	19	Target 7	0.189127	0.00332579
37	D1	20	Target 7	0.181815	-0.00554689
37	D1	21	Target 7	0.189639	0.000715793
37	D1	22	Target 7	0.196422	0.00593703
37	D1	23	Target 7	0.208591	0.0165443
37	D1	24	Target 7	0.224026	0.0304187
37	D1	25	Target 7	0.261441	0.0662719
37	D1	26	Target 7	0.324989	0.128259
37	D1	27	Target 7	0.442105	0.243814
37	D1	28	Target 7	0.652192	0.452339
37	D1	29	Target 7	0.975458	0.774044
37	D1	30	Target 7	1.43238	1.22941
37	D1	31	Target 7	1.87518	1.67065
37	D1	32	Target 7	2.13649	1.93039
37	D1	33	Target 7	2.32742	2.11976
37	D1	34	Target 7	2.49057	2.28135
37	D1	35	Target 7	2.62975	2.41897
37	D1	36	Target 7	2.7297	2.51736
37	D1	37	Target 7	2.78352	2.56961
37	D1	38	Target 7	2.8308	2.61533
37	D1	39	Target 7	2.88964	2.67262
37	D1	40	Target 7	2.91624	2.69765
38	D2	1	Target 7	0.0597674	-0.0223119
38	D2	2	Target 7	0.0703416	-0.0131578
38	D2	3	Target 7	0.0796168	-0.00530281
38	D2	4	Target 7	0.0837397	-0.00260012
38	D2	5	Target 7	0.0857423	-0.00201766
38	D2	6	Target 7	0.0921925	0.00301239
38	D2	7	Target 7	0.0873908	-0.00320947
38	D2	8	Target 7	0.094556	0.00253554
38	D2	9	Target 7	0.0949464	0.00150577
38	D2	10	Target 7	0.0987882	0.00392738
38	D2	11	Target 7	0.0994706	0.00318954
38	D2	12	Target 7	0.102245	0.0045437
38	D2	13	Target 7	0.103807	0.00468532
38	D2	14	Target 7	0.0993067	-0.00123487
38	D2	15	Target 7	0.103963	0.00200154
38	D2	16	Target 7	0.102063	-0.00131844
38	D2	17	Target 7	0.105488	0.000685794
38	D2	18	Target 7	0.0999341	-0.00628812
38	D2	19	Target 7	0.106627	-0.00101568
38	D2	20	Target 7	0.103491	-0.00557152
38	D2	21	Target 7	0.107084	-0.00339905
38	D2	22	Target 7	0.117774	0.00587076
38	D2	23	Target 7	0.113877	0.000553725
38	D2	24	Target 7	0.136943	0.0221998
38	D2	25	Target 7	0.162975	0.0468118
38	D2	26	Target 7	0.216906	0.0993223
38	D2	27	Target 7	0.323759	0.204755
38	D2	28	Target 7	0.507028	0.386604
38	D2	29	Target 7	0.815153	0.693309
38	D2	30	Target 7	1.24564	1.12237
38	D2	31	Target 7	1.72356	1.59887
38	D2	32	Target 7	2.04491	1.9188
38	D2	33	Target 7	2.25619	2.12866
38	D2	34	Target 7	2.42759	2.29864
38	D2	35	Target 7	2.55961	2.42925
38	D2	36	Target 7	2.66892	2.53713
38	D2	37	Target 7	2.74031	2.60711
38	D2	38	Target 7	2.80739	2.67277
38	D2	39	Target 7	2.83844	2.7024
38	D2	40	Target 7	2.89712	2.75966
39	D3	1	Target 7	0.309984	-0.0134656
39	D3	2	Target 7	0.318209	-0.00667757
39	D3	3	Target 7	0.323927	-0.00239667
39	D3	4	Target 7	0.329029	0.00126873
39	D3	5	Target 7	0.324759	-0.00443808
39	D3	6	Target 7	0.32922	-0.00141417
39	D3	7	Target 7	0.334595	0.00252415
39	D3	8	Target 7	0.335683	0.00217509
39	D3	9	Target 7	0.336491	0.00154582
39	D3	10	Target 7	0.339931	0.00354897
39	D3	11	Target 7	0.336633	-0.00118581
39	D3	12	Target 7	0.339959	0.000702867
39	D3	13	Target 7	0.343879	0.00318568
39	D3	14	Target 7	0.340795	-0.00133499
39	D3	15	Target 7	0.347488	0.00392095
39	D3	16	Target 7	0.342892	-0.00211204
39	D3	17	Target 7	0.344537	-0.00190383
39	D3	18	Target 7	0.345113	-0.0027646
39	D3	19	Target 7	0.345918	-0.003397
39	D3	20	Target 7	0.348602	-0.00214994
39	D3	21	Target 7	0.351721	-0.000467615
39	D3	22	Target 7	0.35688	0.00325474
39	D3	23	Target 7	0.3565	0.00143773
39	D3	24	Target 7	0.365626	0.00912671
39	D3	25	Target 7	0.387685	0.029749
39	D3	26	Target 7	0.418733	0.0593602
39	D3	27	Target 7	0.478689	0.117879
39	D3	28	Target 7	0.582871	0.220624
39	D3	29	Target 7	0.755857	0.392173
39	D3	30	Target 7	0.982611	0.61749
39	D3	31	Target 7	1.2234	0.856842
39	D3	32	Target 7	1.3822	1.0142
39	D3	33	Target 7	1.48038	1.11095
39	D3	34	Target 7	1.57344	1.20258
39	D3	35	Target 7	1.6476	1.27529
39	D3	36	Target 7	1.68709	1.31335
39	D3	37	Target 7	1.72769	1.35251
39	D3	38	Target 7	1.755	1.37838
39	D3	39	Target 7	1.78842	1.41037
39	D3	40	Target 7	1.79984	1.42035
40	D4	1	Target 7	0.235424	-0.0433582
40	D4	2	Target 7	0.262753	-0.0194472
40	D4	3	Target 7	0.276973	-0.00864505
40	D4	4	Target 7	0.28736	-0.00167625
40	D4	5	Target 7	0.28891	-0.00354414
40	D4	6	Target 7	0.296813	0.000940811
40	D4	7	Target 7	0.295318	-0.00397279
40	D4	8	Target 7	0.307687	0.00497867
40	D4	9	Target 7	0.31274	0.00661336
40	D4	10	Target 7	0.321319	0.0117741
40	D4	11	Target 7	0.312858	-0.000104475
40	D4	12	Target 7	0.32446	0.00807883
40	D4	13	Target 7	0.322013	0.00221436
40	D4	14	Target 7	0.323414	0.000196976
40	D4	15	Target 7	0.322498	-0.0041372
40	D4	16	Target 7	0.326918	-0.00313531
40	D4	17	Target 7	0.326666	-0.00680535
40	D4	18	Target 7	0.328127	-0.00876229
40	D4	19	Target 7	0.346293	0.00598572
40	D4	20	Target 7	0.342946	-0.000779346
40	D4	21	Target 7	0.370222	0.0230788
40	D4	22	Target 7	0.406763	0.056201
40	D4	23	Target 7	0.472316	0.118336
40	D4	24	Target 7	0.583598	0.226201
40	D4	25	Target 7	0.786443	0.425627
40	D4	26	Target 7	1.13515	0.770913
40	D4	27	Target 7	1.57515	1.2075
40	D4	28	Target 7	2.02592	1.65485
40	D4	29	Target 7	2.33073	1.95624
40	D4	30	Target 7	2.52577	2.14786
40	D4	31	Target 7	2.68669	2.30536
40	D4	32	Target 7	2.8173	2.43256
40	D4	33	Target 7	2.91485	2.52669
40	D4	34	Target 7	3.00736	2.61578
40	D4	35	Target 7	3.04699	2.65199
40	D4	36	Target 7	3.10815	2.70973
40	D4	37	Target 7	3.13167	2.72984
40	D4	38	Target 7	3.16513	2.75988
40	D4	39	Target 7	3.1784	2.76973
40	D4	40	Target 7	3.1936	2.78152
41	D5	1	Target 7	0.322251	-0.0486858
41	D5	2	Target 7	0.36172	-0.0126869
41	D5	3	Target 7	0.375116	-0.00276113
41	D5	4	Target 7	0.377337	-0.00401006
41	D5	5	Target 7	0.379826	-0.00499071
41	D5	6	Target 7	0.388	-0.000287202
41	D5	7	Target 7	0.393001	0.001244
41	D5	8	Target 7	0.397928	0.00270028
41	D5	9	Target 7	0.401515	0.00281707
41	D5	10	Target 7	0.40877	0.00660231
41	D5	11	Target 7	0.400418	-0.00521968
41	D5	12	Target 7	0.415854	0.00674654
41	D5	13	Target 7	0.422831	0.010253
41	D5	14	Target 7	0.415464	-0.000584343
41	D5	15	Target 7	0.419582	6.42657e-05
41	D5	16	Target 7	0.420715	-0.00227287
41	D5	17	Target 7	0.424967	-0.00149164
41	D5	18	Target 7	0.421119	-0.00880982
41	D5	19	Target 7	0.431913	-0.0014854
41	D5	20	Target 7	0.440741	0.00387194
41	D5	21	Target 7	0.460022	0.0196834
41	D5	22	Target 7	0.503996	0.0601871
41	D5	23	Target 7	0.561022	0.113743
41	D5	24	Target 7	0.684731	0.233982
41	D5	25	Target 7	0.89858	0.44436
41	D5	26	Target 7	1.24291	0.785219
41	D5	27	Target 7	1.70487	1.24371
41	D5	28	Target 7	2.13608	1.67145
41	D5	29	Target 7	2.42735	1.95925
41	D5	30	Target 7	2.60362	2.13205
41	D5	31	Target 7	2.77964	2.3046
41	D5	32	Target 7	2.911	2.43249
41	D5	33	Target 7	3.01121	2.52923
41	D5	34	Target 7	3.1001	2.61465
41	D5	35	Target 7	3.12619	2.63727
41	D5	36	Target 7	3.18162	2.68923
41	D5	37	Target 7	3.2125	2.71664
41	D5	38	Target 7	3.24839	2.74906
41	D5	39	Target 7	3.28494	2.78214
41	D5	40	Target 7	3.27928	2.773
42	D6	1	Target 7	0.222102	-0.0350892
42	D6	2	Target 7	0.244269	-0.0163556
42	D6	3	Target 7	0.255935	-0.00812298
42	D6	4	Target 7	0.270664	0.0031723
42	D6	5	Target 7	0.271462	0.000537316
42	D6	6	Target 7	0.275645	0.00128716
42	D6	7	Target 7	0.276801	-0.000990277
42	D6	8	Target 7	0.275994	-0.00523011
42	D6	9	Target 7	0.290558	0.00590081
42	D6	10	Target 7	0.291213	0.00312227
42	D6	11	Target 7	0.293405	0.0018812
42	D6	12	Target 7	0.295391	0.000434055
42	D6	13	Target 7	0.300916	0.00252557
42	D6	14	Target 7	0.306251	0.00442782
42	D6	15	Target 7	0.303943	-0.00131322
42	D6	16	Target 7	0.307552	-0.00113727
42	D6	17	Target 7	0.312335	0.000212554
42	D6	18	Target 7	0.308849	-0.0067072
42	D6	19	Target 7	0.317584	-0.00140498
42	D6	20	Target 7	0.334092	0.0116693
42	D6	21	Target 7	0.348519	0.0226636
42	D6	22	Target 7	0.38511	0.0558212
42	D6	23	Target 7	0.463679	0.130957
42	D6	24	Target 7	0.577682	0.241527
42	D6	25	Target 7	0.813649	0.47406
42	D6	26	Target 7	1.16743	0.824406
42	D6	27	Target 7	1.6338	1.28735
42	D6	28	Target 7	2.09177	1.74188
42	D6	29	Target 7	2.37367	2.02035
42	D6	30	Target 7	2.58776	2.23101
42	D6	31	Target 7	2.74612	2.38594
42	D6	32	Target 7	2.88766	2.52404
42	D6	33	Target 7	3.00165	2.63459
42	D6	34	Target 7	3.06705	2.69657
42	D6	35	Target 7	3.12693	2.75301
42	D6	36	Target 7	3.16007	2.78272
42	D6	37	Target 7	3.19743	2.81664
42	D6	38	Target 7	3.21705	2.83283
42	D6	39	Target 7	3.25568	2.86803
42	D6	40	Target 7	3.27168	2.88059
43	D7	1	Target 8	0.527359	-0.0117278
43	D7	2	Target 8	0.533349	-0.00760922
43	D7	3	Target 8	0.545491	0.00266055
43	D7	4	Target 8	0.546792	0.00208924
43	D7	5	Target 8	0.541626	-0.00494875
43	D7	6	Target 8	0.552325	0.00387918
43	D7	7	Target 8	0.550213	-0.000105205
43	D7	8	Target 8	0.548527	-0.00366354
43	D7	9	Target 8	0.549574	-0.0044881
43	D7	10	Target 8	0.557883	0.00194932
43	D7	11	Target 8	0.560526	0.00272014
43	D7	12	Target 8	0.561652	0.00197377
43	D7	13	Target 8	0.565893	0.0043433
43	D7	14	Target 8	0.555667	-0.00775471
43	D7	15	Target 8	0.566756	0.00146274
43	D7	16	Target 8	0.564633	-0.0025328
43	D7	17	Target 8	0.564812	-0.00422515
43	D7	18	Target 8	0.572088	0.00117814
43	D7	19	Target 8	0.578243	0.00546187
43	D7	20	Target 8	0.588457	0.0138031
43	D7	21	Target 8	0.613753	0.0372276
43	D7	22	Target 8	0.666115	0.0877175
43	D7	23	Target 8	0.764307	0.184038
43	D7	24	Target 8	0.935685	0.353543
43	D7	25	Target 8	1.21437	0.630356
43	D7	26	Target 8	1.62327	1.03739
43	D7	27	Target 8	2.14025	1.55249
43	D7	28	Target 8	2.59442	2.00479
43	D7	29	Target 8	2.8843	2.2928
43	D7	30	Target 8	3.05601	2.46263
43	D7	31	Target 8	3.18349	2.58824
43	D7	32	Target 8	3.27318	2.67606
43	D7	33	Target 8	3.33865	2.73966
43	D7	34	Target 8	3.4242	2.82333
43	D7	35	Target 8	3.44431	2.84158
43	D7	36	Target 8	3.48638	2.88178
43	D7	37	Target 8	3.49961	2.89314
43	D7	38	Target 8	3.52149	2.91314
43	D7	39	Target 8	3.54986	2.93964
43	D7	40	Target 8	3.5432	2.9311
44	D8	1	Target 8	0.238123	-0.023123
44	D8	2	Target 8	0.257484	-0.00546735
44	D8	3	Target 8	0.260909	-0.00374746
44	D8	4	Target 8	0.273597	0.00723535
44	D8	5	Target 8	0.265841	-0.00222486
44	D8	6	Target 8	0.2606	-0.00917166
44	D8	7	Target 8	0.268586	-0.00289058
44	D8	8	Target 8	0.276476	0.00329412
44	D8	9	Target 8	0.278108	0.00322161
44	D8	10	Target 8	0.281291	0.00469959
44	D8	11	Target 8	0.281391	0.00309435
44	D8	12	Target 8	0.279388	-0.000613742
44	D8	13	Target 8	0.281973	0.000266172
44	D8	14	Target 8	0.284699	0.00128708
44	D8	15	Target 8	0.290352	0.00523529
44	D8	16	Target 8	0.282508	-0.00431367
44	D8	17	Target 8	0.283155	-0.00537159
44	D8	18	Target 8	0.293596	0.00336404
44	D8	19	Target 8	0.301428	0.00949143
44	D8	20	Target 8	0.311257	0.0176149
44	D8	21	Target 8	0.339498	0.0441511
44	D8	22	Target 8	0.394393	0.0973413
44	D8	23	Target 8	0.505161	0.206404
44	D8	24	Target 8	0.6817	0.381238
44	D8	25	Target 8	0.989999	0.687832
44	D8	26	Target 8	1.4352	1.13133
44	D8	27	Target 8	1.9868	1.68122
44	D8	28	Target 8	2.48501	2.17773
44	D8	29	Target 8	2.81768	2.50869
44	D8	30	Target 8	2.98977	2.67907
44	D8	31	Target 8	3.1071	2.7947
44	D8	32	Target 8	3.22601	2.9119
44	D8	33	Target 8	3.30085	2.98504
44	D8	34	Target 8	3.37533	3.05782
44	D8	35	Target 8	3.40538	3.08616
44	D8	36	Target 8	3.44501	3.12409
44	D8	37	Target 8	3.44958	3.12695
44	D8	38	Target 8	3.48618	3.16185
44	D8	39	Target 8	3.51481	3.18877
44	D8	40	Target 8	3.49592	3.16817
45	D9	1	Target 8	0.264064	-0.0180098
45	D9	2	Target 8	0.273607	-0.00993231
45	D9	3	Target 8	0.286283	0.00127769
45	D9	4	Target 8	0.285868	-0.000603376
45	D9	5	Target 8	0.285037	-0.00290084
45	D9	6	Target 8	0.288407	-0.000996319
45	D9	7	Target 8	0.288615	-0.00225481
45	D9	8	Target 8	0.295349	0.00301302
45	D9	9	Target 8	0.304161	0.0103589
45	D9	10	Target 8	0.288385	-0.00688248
45	D9	11	Target 8	0.292605	-0.00412943
45	D9	12	Target 8	0.303123	0.00492335
45	D9	13	Target 8	0.307922	0.00825614
45	D9	14	Target 8	0.295581	-0.00555076
45	D9	15	Target 8	0.297137	-0.00546079
45	D9	16	Target 8	0.29938	-0.00468378
45	D9	17	Target 8	0.30702	0.00148935
45	D9	18	Target 8	0.31114	0.00414414
45	D9	19	Target 8	0.310636	0.00217424
45	D9	20	Target 8	0.335288	0.02536
45	D9	21	Target 8	0.363128	0.0517342
45	D9	22	Target 8	0.414241	0.101381
45	D9	23	Target 8	0.517541	0.203215
45	D9	24	Target 8	0.695543	0.37975
45	D9	25	Target 8	1.00886	0.691606
45	D9	26	Target 8	1.46083	1.1421
45	D9	27	Target 8	1.99433	1.67414
45	D9	28	Target 8	2.49961	2.17795
45	D9	29	Target 8	2.80004	2.47692
45	D9	30	Target 8	2.96626	2.64167
45	D9	31	Target 8	3.08918	2.76312
45	D9	32	Target 8	3.20983	2.88231
45	D9	33	Target 8	3.26919	2.9402
45	D9	34	Target 8	3.33941	3.00895
45	D9	35	Target 8	3.36129	3.02937
45	D9	36	Target 8	3.40912	3.07574
45	D9	37	Target 8	3.42725	3.0924
45	D9	38	Target 8	3.4434	3.10708
45	D9	39	Target 8	3.48509	3.14731
45	D9	40	Target 8	3.47956	3.14031
46	D10	1	Target 8	0.170206	-0.0367216
46	D10	2	Target 8	0.201054	-0.00883752
46	D10	3	Target 8	0.208713	-0.00414333
46	D10	4	Target 8	0.217035	0.0012141
46	D10	5	Target 8	0.217211	-0.00157539
46	D10	6	Target 8	0.223083	0.00133202
46	D10	7	Target 8	0.226695	0.00197997
46	D10	8	Target 8	0.230029	0.00234881
46	D10	9	Target 8	0.232373	0.00172842
46	D10	10	Target 8	0.235058	0.00144847
46	D10	11	Target 8	0.231709	-0.00486473
46	D10	12	Target 8	0.242491	0.00295177
46	D10	13	Target 8	0.240153	-0.00235076
46	D10	14	Target 8	0.25101	0.00554147
46	D10	15	Target 8	0.242822	-0.00561081
46	D10	16	Target 8	0.255066	0.00366784
46	D10	17	Target 8	0.269879	0.0155168
46	D10	18	Target 8	0.287683	0.0303561
46	D10	19	Target 8	0.329922	0.0696298
46	D10	20	Target 8	0.394173	0.130917
46	D10	21	Target 8	0.533877	0.267655
46	D10	22	Target 8	0.754019	0.484833
46	D10	23	Target 8	1.10951	0.837361
46	D10	24	Target 8	1.57613	1.30101
46	D10	25	Target 8	2.04528	1.7672
46	D10	26	Target 8	2.39181	2.11077
46	D10	27	Target 8	2.59793	2.31392
46	D10	28	Target 8	2.72345	2.43648
46	D10	29	Target 8	2.84498	2.55504
46	D10	30	Target 8	2.92778	2.63488
46	D10	31	Target 8	2.99168	2.69581
46	D10	32	Target 8	3.04607	2.74723
46	D10	33	Target 8	3.06394	2.76215
46	D10	34	Target 8	3.1045	2.79973
46	D10	35	Target 8	3.11338	2.80566
46	D10	36	Target 8	3.12276	2.81207
46	D10	37	Target 8	3.13045	2.81679
46	D10	38	Target 8	3.14517	2.82855
46	D10	39	Target 8	3.16196	2.84237
46	D10	40	Target 8	3.16906	2.84651
47	D11	1	Target 8	0.204595	-0.0412159
47	D11	2	Target 8	0.232933	-0.0162765
47	D11	3	Target 8	0.242705	-0.00990342
47	D11	4	Target 8	0.258009	0.00200149
47	D11	5	Target 8	0.250922	-0.00848391
47	D11	6	Target 8	0.265548	0.00274318
47	D11	7	Target 8	0.273669	0.00746543
47	D11	8	Target 8	0.278948	0.00934552
47	D11	9	Target 8	0.280533	0.00753204
47	D11	10	Target 8	0.270451	-0.00594867
47	D11	11	Target 8	0.286929	0.00713113
47	D11	12	Target 8	0.283682	0.000485793
47	D11	13	Target 8	0.281905	-0.0046902
47	D11	14	Target 8	0.285777	-0.00421734
47	D11	15	Target 8	0.289932	-0.00346104
47	D11	16	Target 8	0.296625	-0.000166674
47	D11	17	Target 8	0.310107	0.00991737
47	D11	18	Target 8	0.333192	0.0296036
47	D11	19	Target 8	0.35764	0.0506525
47	D11	20	Target 8	0.43733	0.126943
47	D11	21	Target 8	0.567301	0.253516
47	D11	22	Target 8	0.769511	0.452327
47	D11	23	Target 8	1.10895	0.788365
47	D11	24	Target 8	1.58251	1.25852
47	D11	25	Target 8	2.06189	1.73451
47	D11	26	Target 8	2.43607	2.10529
47	D11	27	Target 8	2.68913	2.35495
47	D11	28	Target 8	2.8313	2.49373
47	D11	29	Target 8	2.94567	2.60469
47	D11	30	Target 8	3.00632	2.66194
47	D11	31	Target 8	3.09845	2.75068
47	D11	32	Target 8	3.16296	2.81179
47	D11	33	Target 8	3.20009	2.84552
47	D11	34	Target 8	3.22629	2.86833
47	D11	35	Target 8	3.21738	2.85601
47	D11	36	Target 8	3.23504	2.87028
47	D11	37	Target 8	3.28073	2.91256
47	D11	38	Target 8	3.28387	2.91231
47	D11	39	Target 8	3.28198	2.90702
47	D11	40	Target 8	3.31909	2.94073
48	D12	1	Target 8	0.225786	-0.0425342
48	D12	2	Target 8	0.258951	-0.0139828
48	D12	3	Target 8	0.279621	0.00207223
48	D12	4	Target 8	0.275148	-0.00701525
48	D12	5	Target 8	0.280071	-0.00670609
48	D12	6	Target 8	0.284473	-0.00691823
48	D12	7	Target 8	0.3082	0.0121942
48	D12	8	Target 8	0.299071	-0.0015492
48	D12	9	Target 8	0.318146	0.0129114
48	D12	10	Target 8	0.31632	0.00647152
48	D12	11	Target 8	0.310871	-0.00359172
48	D12	12	Target 8	0.316278	-0.00279913
48	D12	13	Target 8	0.323071	-0.000620109
48	D12	14	Target 8	0.337402	0.00909571
48	D12	15	Target 8	0.319375	-0.0135453
48	D12	16	Target 8	0.323758	-0.0137767
48	D12	17	Target 8	0.345845	0.00369614
48	D12	18	Target 8	0.357936	0.0111725
48	D12	19	Target 8	0.391227	0.0398495
48	D12	20	Target 8	0.456128	0.100137
48	D12	21	Target 8	0.576034	0.215428
48	D12	22	Target 8	0.773575	0.408355
48	D12	23	Target 8	1.10894	0.739105
48	D12	24	Target 8	1.53996	1.16551
48	D12	25	Target 8	2.02315	1.64408
48	D12	26	Target 8	2.36782	1.98414
48	D12	27	Target 8	2.60977	2.22148
48	D12	28	Target 8	2.75144	2.35854
48	D12	29	Target 8	2.85767	2.46015
48	D12	30	Target 8	2.94611	2.54397
48	D12	31	Target 8	3.01206	2.60531
48	D12	32	Target 8	3.04222	2.63086
48	D12	33	Target 8	3.08641	2.67043
48	D12	34	Target 8	3.11168	2.69109
48	D12	35	Target 8	3.11502	2.68981
48	D12	36	Target 8	3.14777	2.71795
48	D12	37	Target 8	3.17096	2.73652
48	D12	38	Target 8	3.15916	2.72011
48	D12	39	Target 8	3.17933	2.73567
48	D12	40	Target 8	3.19078	2.7425
49	E1	1	Target 9	0.306497	-0.021651
49	E1	2	Target 9	0.324157	-0.00657156
49	E1	3	Target 9	0.329834	-0.00347456
49	E1	4	Target 9	0.340933	0.00504455
49	E1	5	Target 9	0.341676	0.00320698
49	E1	6	Target 9	0.343416	0.00236682
49	E1	7	Target 9	0.33373	-0.00989904
49	E1	8	Target 9	0.348788	0.00257837
49	E1	9	Target 9	0.346185	-0.00260446
49	E1	10	Target 9	0.350721	-0.00064919
49	E1	11	Target 9	0.352661	-0.00128928
49	E1	12	Target 9	0.359572	0.00304112
49	E1	13	Target 9	0.361889	0.00277776
49	E1	14	Target 9	0.365019	0.00332818
49	E1	15	Target 9	0.359844	-0.00442724
49	E1	16	Target 9	0.36519	-0.00166138
49	E1	17	Target 9	0.38136	0.0119284
49	E1	18	Target 9	0.384812	0.0128
49	E1	19	Target 9	0.415188	0.0405955
49	E1	20	Target 9	0.466511	0.0893388
49	E1	21	Target 9	0.559708	0.179955
49	E1	22	Target 9	0.723501	0.341168
49	E1	23	Target 9	0.990687	0.605774
49	E1	24	Target 9	1.37707	0.98958
49	E1	25	Target 9	1.82487	1.4348
49	E1	26	Target 9	2.17562	1.78297
49	E1	27	Target 9	2.40907	2.01384
49	E1	28	Target 9	2.53514	2.13733
49	E1	29	Target 9	2.65092	2.25053
49	E1	30	Target 9	2.72412	2.32115
49	E1	31	Target 9	2.78769	2.38213
49	E1	32	Target 9	2.83109	2.42295
49	E1	33	Target 9	2.8502	2.43948
[truncated: 1,887 more rows]

## Sheet: Results
Block Type	96-Well 0.2-mL Block
Calibration Background is expired	No
Calibration Background performed on	04-12-2018
Calibration Pure Dye ABY is expired	No
Calibration Pure Dye ABY performed on	04-12-2018
Calibration Pure Dye CY5 is expired	No
Calibration Pure Dye CY5 performed on	04-12-2018
Calibration Pure Dye FAM is expired	No
Calibration Pure Dye FAM performed on	04-12-2018
Calibration Pure Dye JUN is expired	No
Calibration Pure Dye JUN performed on	04-12-2018
Calibration Pure Dye MUSTANG PURPLE is expired	No
Calibration Pure Dye MUSTANG PURPLE performed on	04-12-2018
Calibration Pure Dye NED is expired	No
Calibration Pure Dye NED performed on	04-12-2018
Calibration Pure Dye ROX is expired	No
Calibration Pure Dye ROX performed on	04-12-2018
Calibration Pure Dye SYBR is expired	No
Calibration Pure Dye SYBR performed on	04-12-2018
Calibration Pure Dye TAMRA is expired	No
Calibration Pure Dye TAMRA performed on	04-12-2018
Calibration Pure Dye VIC is expired	No
Calibration Pure Dye VIC performed on	04-12-2018
Calibration ROI is expired	No
Calibration ROI performed on	04-12-2018
Calibration Uniformity is expired	No
Calibration Uniformity performed on	04-12-2018
Chemistry	SYBR_GREEN
Date Created	2021-07-10 01:26:38 AM PDT
Experiment Barcode
Experiment Comment
Experiment File Name	D:\datas\zhu lab\wdy\2021-07-10_000241.eds
Experiment Name	2021-07-10_000241
Experiment Run End Time	Not Started
Experiment Type	Standard Curve
Instrument Name
Instrument Serial Number
Instrument Type	QuantStudio™ 5 System
Passive Reference	ROX
Post-read Stage/Step
Pre-read Stage/Step
Quantification Cycle Method	Ct
Signal Smoothing On	true
Stage where Melt Analysis is performed	Stage3
Stage/ Cycle where Ct Analysis is performed	Stage2, Step2
User Name
Well	Well Position	Omit	Sample Name	Target Name	Task	Reporter	Quencher	CT	Ct Mean	Ct SD	Quantity	Quantity Mean	Quantity SD	Y-Intercept	R(superscript 2)	Slope	Efficiency	Automatic Ct Threshold	Ct Threshold	Automatic Baseline	Baseline Start	Baseline End	Amp Status	Comments	Cq Conf	CQCONF	EXPFAIL	MTP	HIGHSD	Tm1	Tm2	Tm3	Tm4
1	A1	FALSE	wt	Target 1	UNKNOWN	SYBR	None	26.153										TRUE	0.277377	TRUE	3	20	Amp		0.901396	N	N	N	N	84.9621
2	A2	FALSE	wt	Target 1	UNKNOWN	SYBR	None	25.8846										TRUE	0.277377	TRUE	3	21	Amp		0.941602	N	N	N	N	85.1081
3	A3	FALSE	wt	Target 1	UNKNOWN	SYBR	None	25.7708										TRUE	0.277377	TRUE	3	20	Amp		0.9526	N	N	N	N	84.6702
4	A4	FALSE	ko	Target 1	UNKNOWN	SYBR	None	22.8733										TRUE	0.277377	TRUE	3	16	Amp		0.878413	N	N	N	N	84.8161
5	A5	FALSE	ko	Target 1	UNKNOWN	SYBR	None	23.0125										TRUE	0.277377	TRUE	3	18	Amp		0.878519	N	N	N	N	85.1081
6	A6	FALSE	ko	Target 1	UNKNOWN	SYBR	None	23.1455										TRUE	0.277377	TRUE	3	18	Amp		0.913175	N	N	N	N	85.1081
7	A7	FALSE	wt	Target 2	UNKNOWN	SYBR	None	26.9364										TRUE	0.291264	TRUE	3	21	Amp		0.975891	N	N	N	N	85.692
8	A8	FALSE	wt	Target 2	UNKNOWN	SYBR	None	26.9843										TRUE	0.291264	TRUE	3	21	Amp		0.943521	N	N	N	N	85.692
9	A9	FALSE	wt	Target 2	UNKNOWN	SYBR	None	26.9338										TRUE	0.291264	TRUE	3	20	Amp		0.956517	N	N	N	N	85.4
10	A10	FALSE	ko	Target 2	UNKNOWN	SYBR	None	25.2798										TRUE	0.291264	TRUE	3	19	Amp		0.921758	N	N	N	N	85.4
11	A11	FALSE	ko	Target 2	UNKNOWN	SYBR	None	25.4766										TRUE	0.291264	TRUE	3	19	Amp		0.90455	N	N	N	N	85.4
12	A12	FALSE	ko	Target 2	UNKNOWN	SYBR	None	25.5425										TRUE	0.291264	TRUE	3	21	Amp		0.861215	N	N	N	N	85.4
13	B1	FALSE	wt	Target 3	UNKNOWN	SYBR	None	25.1923										TRUE	0.34406	TRUE	3	20	Amp		0.941905	N	N	N	N	81.1668
14	B2	FALSE	wt	Target 3	UNKNOWN	SYBR	None	25.0821										TRUE	0.34406	TRUE	3	18	Amp		0.956741	N	N	N	N	81.1668
15	B3	FALSE	wt	Target 3	UNKNOWN	SYBR	None	25.0077										TRUE	0.34406	TRUE	3	20	Amp		0.949558	N	N	N	N	81.0209
16	B4	FALSE	ko	Target 3	UNKNOWN	SYBR	None	21.9903										TRUE	0.34406	TRUE	3	17	Amp		0.91816	N	N	N	N	81.0209
17	B5	FALSE	ko	Target 3	UNKNOWN	SYBR	None	21.8739										TRUE	0.34406	TRUE	3	15	Amp		0.922406	N	N	N	N	81.1668
18	B6	FALSE	ko	Target 3	UNKNOWN	SYBR	None	21.8897										TRUE	0.34406	TRUE	3	16	Amp		0.950219	N	N	N	N	81.3128
19	B7	FALSE	wt	Target 4	UNKNOWN	SYBR	None	Undetermined										TRUE	0.347914	TRUE	3	39	No Amp		0	Y	Y	N	N	60.0009
20	B8	FALSE	wt	Target 4	UNKNOWN	SYBR	None	Undetermined										TRUE	0.347914	TRUE	3	39	No Amp		0	Y	Y	N	N	60.0009
21	B9	FALSE	wt	Target 4	UNKNOWN	SYBR	None	Undetermined										TRUE	0.347914	TRUE	3	39	No Amp		0	Y	Y	N	N	60.0009
22	B10	FALSE	ko	Target 4	UNKNOWN	SYBR	None	22.0265										TRUE	0.347914	TRUE	3	17	Amp		0.917383	N	N	N	N	78.3934
23	B11	FALSE	ko	Target 4	UNKNOWN	SYBR	None	22.1646										TRUE	0.347914	TRUE	3	17	Amp		0.915233	N	N	N	N	78.5393
24	B12	FALSE	ko	Target 4	UNKNOWN	SYBR	None	22.2255										TRUE	0.347914	TRUE	3	16	Amp		0.915193	N	N	N	N	78.5393
25	C1	FALSE	wt	Target 5	UNKNOWN	SYBR	None	30.6241										TRUE	0.255203	TRUE	3	24	Amp		0.981427	N	N	N	N	74.0142
26	C2	FALSE	wt	Target 5	UNKNOWN	SYBR	None	30.3572										TRUE	0.255203	TRUE	3	25	Amp		0.97675	N	N	N	N	74.3062
27	C3	FALSE	wt	Target 5	UNKNOWN	SYBR	None	30.8787										TRUE	0.255203	TRUE	3	26	Amp		0.986762	N	N	N	N	74.1602
28	C4	FALSE	ko	Target 5	UNKNOWN	SYBR	None	26.6213										TRUE	0.255203	TRUE	3	18	Amp		0.975602	N	N	Y	N	73.8682	81.1668
29	C5	FALSE	ko	Target 5	UNKNOWN	SYBR	None	26.4848										TRUE	0.255203	TRUE	3	20	Amp		0.978509	N	N	N	N	74.3062
30	C6	FALSE	ko	Target 5	UNKNOWN	SYBR	None	26.7061										TRUE	0.255203	TRUE	3	21	Amp		0.973098	N	N	N	N	74.3062
31	C7	FALSE	wt	Target 6	UNKNOWN	SYBR	None	24.0765										TRUE	0.2412	TRUE	3	19	Amp		0.938953	N	N	N	N	85.4
32	C8	FALSE	wt	Target 6	UNKNOWN	SYBR	None	23.8503										TRUE	0.2412	TRUE	3	17	Amp		0.953151	N	N	N	N	85.4
33	C9	FALSE	wt	Target 6	UNKNOWN	SYBR	None	23.9363										TRUE	0.2412	TRUE	3	19	Amp		0.964413	N	N	N	N	85.1081
34	C10	FALSE	ko	Target 6	UNKNOWN	SYBR	None	21.7971										TRUE	0.2412	TRUE	3	17	Amp		0.871936	N	N	N	Y	85.2541
35	C11	FALSE	ko	Target 6	UNKNOWN	SYBR	None	22.5885										TRUE	0.2412	TRUE	3	16	Amp		0.889613	N	N	N	Y	85.1081
36	C12	FALSE	ko	Target 6	UNKNOWN	SYBR	None	22.7338										TRUE	0.2412	TRUE	3	19	Amp		0.894114	N	N	N	Y	85.1081
37	D1	FALSE	wt	Target 7	UNKNOWN	SYBR	None	26.2909										TRUE	0.152941	TRUE	3	20	Amp		0.948448	N	N	N	Y	80.8749
38	D2	FALSE	wt	Target 7	UNKNOWN	SYBR	None	26.6093										TRUE	0.152941	TRUE	3	22	Amp		0.957291	N	N	N	Y	80.8749
39	D3	FALSE	wt	Target 7	UNKNOWN	SYBR	None	27.3724										TRUE	0.152941	TRUE	3	23	Amp		0.935185	N	N	N	Y	80.7289
40	D4	FALSE	ko	Target 7	UNKNOWN	SYBR	None	23.45										TRUE	0.152941	TRUE	3	19	Amp		0.905817	N	N	N	N	80.7289
41	D5	FALSE	ko	Target 7	UNKNOWN	SYBR	None	23.4059										TRUE	0.152941	TRUE	3	18	Amp		0.90292	N	N	N	N	81.0209
42	D6	FALSE	ko	Target 7	UNKNOWN	SYBR	None	23.3208										TRUE	0.152941	TRUE	3	18	Amp		0.916071	N	N	N	N	81.0209
43	D7	FALSE	wt	Target 8	UNKNOWN	SYBR	None	23.4999										TRUE	0.257502	TRUE	3	19	Amp		0.960477	N	N	N	N	80.291
44	D8	FALSE	wt	Target 8	UNKNOWN	SYBR	None	23.3663										TRUE	0.257502	TRUE	3	17	Amp		0.951775	N	N	N	N	80.291
45	D9	FALSE	wt	Target 8	UNKNOWN	SYBR	None	23.3735										TRUE	0.257502	TRUE	3	18	Amp		0.96047	N	N	N	N	80.291
46	D10	FALSE	ko	Target 8	UNKNOWN	SYBR	None	20.9609										TRUE	0.257502	TRUE	3	15	Amp		0.90905	N	N	N	N	80.291
47	D11	FALSE	ko	Target 8	UNKNOWN	SYBR	None	21.0619										TRUE	0.257502	TRUE	3	15	Amp		0.904853	N	N	N	N	79.9991
48	D12	FALSE	ko	Target 8	UNKNOWN	SYBR	None	21.2472										TRUE	0.257502	TRUE	3	15	Amp		0.884638	N	N	N	N	80.145
49	E1	FALSE	wt	Target 9	UNKNOWN	SYBR	None	21.679										TRUE	0.281199	TRUE	3	15	Amp		0.922905	N	N	N	N	82.4806
50	E2	FALSE	wt	Target 9	UNKNOWN	SYBR	None	21.4673										TRUE	0.281199	TRUE	3	16	Amp		0.955457	N	N	N	N	82.3346
51	E3	FALSE	wt	Target 9	UNKNOWN	SYBR	None	21.4574										TRUE	0.281199	TRUE	3	16	Amp		0.919599	N	N	N	N	82.3346
52	E4	FALSE	ko	Target 9	UNKNOWN	SYBR	None	19.0821										TRUE	0.281199	TRUE	3	13	Amp		0.903819	N	N	N	N	82.3346
53	E5	FALSE	ko	Target 9	UNKNOWN	SYBR	None	19.0322										TRUE	0.281199	TRUE	3	13	Amp		0.928143	N	N	N	N	82.6266
54	E6	FALSE	ko	Target 9	UNKNOWN	SYBR	None	19.0921										TRUE	0.281199	TRUE	3	13	Amp		0.916639	N	N	N	N	82.6266
55	E7	FALSE	wt	Target 10	UNKNOWN	SYBR	None	27.5198										TRUE	0.326926	TRUE	3	22	Amp		0.928192	N	N	Y	N	82.4806	85.9839	73.1384
56	E8	FALSE	wt	Target 10	UNKNOWN	SYBR	None	27.083										TRUE	0.326926	TRUE	3	22	Amp		0.948812	N	N	Y	N	82.4806	73.2843	85.9839
57	E9	FALSE	wt	Target 10	UNKNOWN	SYBR	None	27.4984										TRUE	0.326926	TRUE	3	22	Amp		0.958411	N	N	Y	N	82.4806	72.9924	85.9839
58	E10	FALSE	ko	Target 10	UNKNOWN	SYBR	None	26.8343										TRUE	0.326926	TRUE	3	21	Amp		0.921125	N	N	Y	Y	82.1886	86.1299	72.9924
59	E11	FALSE	ko	Target 10	UNKNOWN	SYBR	None	25.5827										TRUE	0.326926	TRUE	3	19	Amp		0.936435	N	N	Y	Y	81.8967	73.1384
60	E12	FALSE	ko	Target 10	UNKNOWN	SYBR	None	27.0712										TRUE	0.326926	TRUE	3	21	Amp		0.896837	N	N	Y	Y	82.0427	85.9839	72.9924
61	F1	FALSE	wt	Target 11	UNKNOWN	SYBR	None	34.7418										TRUE	0.161955	TRUE	3	30	Amp		0.944482	N	N	Y	Y	84.0863	78.2474
62	F2	FALSE	wt	Target 11	UNKNOWN	SYBR	None	33.1576										TRUE	0.161955	TRUE	3	28	Amp		0.954061	N	N	N	Y	84.0863
63	F3	FALSE	wt	Target 11	UNKNOWN	SYBR	None	33.684										TRUE	0.161955	TRUE	3	27	Amp		0.952824	N	N	Y	Y	83.9403	74.89
64	F4	FALSE	ko	Target 11	UNKNOWN	SYBR	None	32.1443										TRUE	0.161955	TRUE	3	26	Amp		0.920764	N	N	N	N	83.9403
65	F5	FALSE	ko	Target 11	UNKNOWN	SYBR	None	31.7035										TRUE	0.161955	TRUE	3	27	Amp		0.92897	N	N	N	N	84.0863
66	F6	FALSE	ko	Target 11	UNKNOWN	SYBR	None	32.4845										TRUE	0.161955	TRUE	3	26	Amp		0.921752	N	N	Y	N	84.0863	78.2474
67	F7	FALSE	wt	Target 13	UNKNOWN	SYBR	None	28.1446										TRUE	0.33603	TRUE	3	22	Amp		0.95481	N	N	N	N	84.3782
68	F8	FALSE	wt	Target 13	UNKNOWN	SYBR	None	28.4137										TRUE	0.33603	TRUE	3	23	Amp		0.958239	N	N	N	N	84.5242
69	F9	FALSE	wt	Target 13	UNKNOWN	SYBR	None	28.1574										TRUE	0.33603	TRUE	3	23	Amp		0.955795	N	N	N	N	84.3782
70	F10	FALSE	ko	Target 13	UNKNOWN	SYBR	None	26.8585										TRUE	0.33603	TRUE	3	21	Amp		0.926468	N	N	N	N	84.5242
71	F11	FALSE	ko	Target 13	UNKNOWN	SYBR	None	26.9764										TRUE	0.33603	TRUE	3	22	Amp		0.911196	N	N	N	N	84.2322
72	F12	FALSE	ko	Target 13	UNKNOWN	SYBR	None	26.9954										TRUE	0.33603	TRUE	3	22	Amp		0.911811	N	N	N	N	84.2322
73	G1	FALSE	wt	Target 14	UNKNOWN	SYBR	None	29.2668										TRUE	0.271517	TRUE	3	23	Amp		0.96261	N	N	N	N	79.7071
74	G2	FALSE	wt	Target 14	UNKNOWN	SYBR	None	29.0135										TRUE	0.271517	TRUE	3	23	Amp		0.958981	N	N	N	N	79.7071
75	G3	FALSE	wt	Target 14	UNKNOWN	SYBR	None	29.0622										TRUE	0.271517	TRUE	3	22	Amp		0.963895	N	N	N	N	79.7071
76	G4	FALSE	ko	Target 14	UNKNOWN	SYBR	None	24.583										TRUE	0.271517	TRUE	3	18	Amp		0.941653	N	N	N	N	79.5611
77	G5	FALSE	ko	Target 14	UNKNOWN	SYBR	None	24.519										TRUE	0.271517	TRUE	3	19	Amp		0.94612	N	N	N	N	79.7071
78	G6	FALSE	ko	Target 14	UNKNOWN	SYBR	None	24.4289										TRUE	0.271517	TRUE	3	18	Amp		0.925207	N	N	N	N	79.8531
79	G7	FALSE	wt	Target 15	UNKNOWN	SYBR	None	Undetermined										TRUE	0.341677	TRUE	3	39	No Amp		0	Y	Y	N	N	60.0009
80	G8	FALSE	wt	Target 15	UNKNOWN	SYBR	None	26.6998										TRUE	0.341677	TRUE	3	21	Amp		0.9572	N	N	Y	N	79.8531	82.3346
81	G9	FALSE	wt	Target 15	UNKNOWN	SYBR	None	Undetermined										TRUE	0.341677	TRUE	3	33	Inconclusive		0	Y	N	Y	N	80.291	68.4673
82	G10	FALSE	ko	Target 15	UNKNOWN	SYBR	None	22.9115										TRUE	0.341677	TRUE	3	16	Amp		0.91273	N	N	N	N	79.9991
83	G11	FALSE	ko	Target 15	UNKNOWN	SYBR	None	23.0317										TRUE	0.341677	TRUE	3	17	Amp		0.917344	N	N	N	N	79.8531
84	G12	FALSE	ko	Target 15	UNKNOWN	SYBR	None	22.9951										TRUE	0.341677	TRUE	3	17	Amp		0.886232	N	N	N	N	79.8531
85	H1	FALSE	wt	Target 16	UNKNOWN	SYBR	None	34.9217										TRUE	0.298349	TRUE	3	29	Amp		0.920856	N	N	Y	N	87.7356	84.8161	74.3062
86	H2	FALSE	wt	Target 16	UNKNOWN	SYBR	None	35.3581										TRUE	0.298349	TRUE	3	30	Amp		0.931652	N	N	N	N	85.2541
87	H3	FALSE	wt	Target 16	UNKNOWN	SYBR	None	34.5137										TRUE	0.298349	TRUE	3	29	Amp		0.946665	N	N	Y	N	77.5175	86.1299
88	H4	FALSE	ko	Target 16	UNKNOWN	SYBR	None	34.0433										TRUE	0.298349	TRUE	3	28	Amp		0.915316	N	N	Y	N	87.8815	83.7943
89	H5	FALSE	ko	Target 16	UNKNOWN	SYBR	None	34.1132										TRUE	0.298349	TRUE	3	27	Amp		0.914191	N	N	Y	N	88.0275	84.2322
90	H6	FALSE	ko	Target 16	UNKNOWN	SYBR	None	34.0309										TRUE	0.298349	TRUE	3	30	Amp		0.878502	N	N	Y	N	88.0275	84.0863
91	H7	FALSE	wt	18s	UNKNOWN	SYBR	None	5.2516										TRUE	0.201297	TRUE	3	3	Amp		0.970172	N	N	N	N	82.7725
92	H8	FALSE	wt	18s	UNKNOWN	SYBR	None	5.20825										TRUE	0.201297	TRUE	3	3	Amp		0.978609	N	N	N	N	82.7725
93	H9	FALSE	wt	18s	UNKNOWN	SYBR	None	5.25824										TRUE	0.201297	TRUE	3	3	Amp		0.974337	N	N	N	N	82.9185
94	H10	FALSE	ko	18s	UNKNOWN	SYBR	None	4.83746										TRUE	0.201297	TRUE	3	3	Amp		0.979912	N	N	N	N	83.0645
95	H11	FALSE	ko	18s	UNKNOWN	SYBR	None	4.90586										TRUE	0.201297	TRUE	3	3	Amp		0.981724	N	N	N	N	82.7725
96	H12	FALSE	ko	18s	UNKNOWN	SYBR	None	4.75107										TRUE	0.201297	TRUE	3	3	Amp		0.96276	N	N	N	N	82.7725

## Sheet: Melt Curve Raw Data
Block Type	96-Well 0.2-mL Block
Calibration Background is expired	No
Calibration Background performed on	04-12-2018
Calibration Pure Dye ABY is expired	No
Calibration Pure Dye ABY performed on	04-12-2018
Calibration Pure Dye CY5 is expired	No
Calibration Pure Dye CY5 performed on	04-12-2018
Calibration Pure Dye FAM is expired	No
Calibration Pure Dye FAM performed on	04-12-2018
Calibration Pure Dye JUN is expired	No
Calibration Pure Dye JUN performed on	04-12-2018
Calibration Pure Dye MUSTANG PURPLE is expired	No
Calibration Pure Dye MUSTANG PURPLE performed on	04-12-2018
Calibration Pure Dye NED is expired	No
Calibration Pure Dye NED performed on	04-12-2018
Calibration Pure Dye ROX is expired	No
Calibration Pure Dye ROX performed on	04-12-2018
Calibration Pure Dye SYBR is expired	No
Calibration Pure Dye SYBR performed on	04-12-2018
Calibration Pure Dye TAMRA is expired	No
Calibration Pure Dye TAMRA performed on	04-12-2018
Calibration Pure Dye VIC is expired	No
Calibration Pure Dye VIC performed on	04-12-2018
Calibration ROI is expired	No
Calibration ROI performed on	04-12-2018
Calibration Uniformity is expired	No
Calibration Uniformity performed on	04-12-2018
Chemistry	SYBR_GREEN
Date Created	2021-07-10 01:26:38 AM PDT
Experiment Barcode
Experiment Comment
Experiment File Name	D:\datas\zhu lab\wdy\2021-07-10_000241.eds
Experiment Name	2021-07-10_000241
Experiment Run End Time	Not Started
Experiment Type	Standard Curve
Instrument Name
Instrument Serial Number
Instrument Type	QuantStudio™ 5 System
Passive Reference	ROX
Post-read Stage/Step
Pre-read Stage/Step
Quantification Cycle Method	Ct
Signal Smoothing On	true
Stage where Melt Analysis is performed	Stage3
Stage/ Cycle where Ct Analysis is performed	Stage2, Step2
User Name
Well	Well Position	Reading	Temperature	Fluorescence	Derivative	Target Name
1	A1	1	60.0009	380681	8447.91	Target 1
1	A1	2	60.2928	378836	8479.26	Target 1
1	A1	3	60.5848	377754	8509.91	Target 1
1	A1	4	60.8767	373940	8528.28	Target 1
1	A1	5	61.1687	371972	8530.5	Target 1
1	A1	6	61.4606	368527	8519.44	Target 1
1	A1	7	61.7526	367137	8498.86	Target 1
1	A1	8	62.0445	364741	8469.36	Target 1
1	A1	9	62.3365	361850	8429.6	Target 1
1	A1	10	62.6284	358045	8381.58	Target 1
1	A1	11	62.9203	356119	8334.12	Target 1
1	A1	12	63.2123	353617	8299.7	Target 1
1	A1	13	63.5042	350890	8287.48	Target 1
1	A1	14	63.7962	349187	8297.23	Target 1
1	A1	15	64.0881	346073	8319.01	Target 1
1	A1	16	64.3801	343671	8338.36	Target 1
1	A1	17	64.672	340530	8343.55	Target 1
1	A1	18	64.9639	338847	8330.83	Target 1
1	A1	19	65.2559	334477	8305.51	Target 1
1	A1	20	65.5478	333862	8275.66	Target 1
1	A1	21	65.8398	329537	8248.05	Target 1
1	A1	22	66.1317	328592	8247.15	Target 1
1	A1	23	66.4237	325413	8271.71	Target 1
1	A1	24	66.7156	322600	8299.14	Target 1
1	A1	25	67.0076	320068	8317.57	Target 1
1	A1	26	67.2995	318086	8319.19	Target 1
1	A1	27	67.5914	314741	8296.51	Target 1
1	A1	28	67.8834	311648	8229.69	Target 1
1	A1	29	68.1753	309118	8132.31	Target 1
1	A1	30	68.4673	308159	8037.62	Target 1
1	A1	31	68.7592	303704	7971.98	Target 1
1	A1	32	69.0512	302656	7954.42	Target 1
1	A1	33	69.3431	299944	7991.28	Target 1
1	A1	34	69.635	297455	8073.84	Target 1
1	A1	35	69.927	295177	8178.96	Target 1
1	A1	36	70.2189	292238	8273.3	Target 1
1	A1	37	70.5109	289387	8306.6	Target 1
1	A1	38	70.8028	287786	8290.55	Target 1
1	A1	39	71.0948	282669	8189.51	Target 1
1	A1	40	71.3867	282238	8026.19	Target 1
1	A1	41	71.6787	277930	7850.78	Target 1
1	A1	42	71.9706	277722	7717.48	Target 1
1	A1	43	72.2625	275302	7668.33	Target 1
1	A1	44	72.5545	271738	7716.96	Target 1
1	A1	45	72.8464	270718	7845.15	Target 1
1	A1	46	73.1384	268278	8013.74	Target 1
1	A1	47	73.4303	263432	8182.97	Target 1
1	A1	48	73.7223	262389	8313.37	Target 1
1	A1	49	74.0142	259046	8397.53	Target 1
1	A1	50	74.3062	255691	8491.8	Target 1
1	A1	51	74.5981	254901	8614.36	Target 1
1	A1	52	74.89	252461	8769.55	Target 1
1	A1	53	75.182	248476	8941.54	Target 1
1	A1	54	75.4739	243666	9100.95	Target 1
1	A1	55	75.7659	242802	9219.96	Target 1
1	A1	56	76.0578	237944	9285.03	Target 1
1	A1	57	76.3498	236574	9298.61	Target 1
1	A1	58	76.6417	233180	9269.96	Target 1
1	A1	59	76.9336	230141	9204.59	Target 1
1	A1	60	77.2256	227146	9101.51	Target 1
1	A1	61	77.5175	222330	8960.48	Target 1
1	A1	62	77.8095	221893	8792.52	Target 1
1	A1	63	78.1014	218814	8622.69	Target 1
1	A1	64	78.3934	215970	8481.87	Target 1
1	A1	65	78.6853	215406	8391.65	Target 1
1	A1	66	78.9773	211593	8352.4	Target 1
1	A1	67	79.2692	207457	8343.05	Target 1
1	A1	68	79.5611	206749	8331.96	Target 1
1	A1	69	79.8531	203036	8292.81	Target 1
1	A1	70	80.145	200123	8174.32	Target 1
1	A1	71	80.437	198588	8006.23	Target 1
1	A1	72	80.7289	196521	7837.31	Target 1
1	A1	73	81.0209	193992	7725.24	Target 1
1	A1	74	81.3128	191037	7733.68	Target 1
1	A1	75	81.6048	190509	7931.17	Target 1
1	A1	76	81.8967	187697	8355.69	Target 1
1	A1	77	82.1886	183924	8887.18	Target 1
1	A1	78	82.4806	181416	9776.52	Target 1
1	A1	79	82.7725	178764	11199	Target 1
1	A1	80	83.0645	173651	13381.2	Target 1
1	A1	81	83.3564	169571	16541.9	Target 1
1	A1	82	83.6484	164475	20771.6	Target 1
1	A1	83	83.9403	152559	25876.8	Target 1
1	A1	84	84.2322	131375	31269.5	Target 1
1	A1	85	84.5242	95293.9	36000.2	Target 1
1	A1	86	84.8161	56814.3	38989	Target 1
1	A1	87	85.1081	36691.1	39398	Target 1
1	A1	88	85.4	30790.4	36974.7	Target 1
1	A1	89	85.692	31519.6	32180.9	Target 1
1	A1	90	85.9839	29521.7	26026.1	Target 1
1	A1	91	86.2758	30133.1	19690.6	Target 1
1	A1	92	86.5678	30265	14137.2	Target 1
1	A1	93	86.8597	29102	9883.88	Target 1
1	A1	94	87.1517	28662.6	6203.71	Target 1
1	A1	95	87.4436	28146	3370.33	Target 1
1	A1	96	87.7356	28106.7	1818.87	Target 1
1	A1	97	88.0275	28871.8	1045.29	Target 1
1	A1	98	88.3195	28488.4	692.388	Target 1
1	A1	99	88.6114	27236.7	542	Target 1
1	A1	100	88.9034	25601.9	466.073	Target 1
1	A1	101	89.1953	26736.7	388.061	Target 1
1	A1	102	89.4872	27570.8	271.586	Target 1
1	A1	103	89.7792	26946.9	121.633	Target 1
1	A1	104	90.0711	27201.7	-24.2441	Target 1
1	A1	105	90.3631	26650.2	-121.443	Target 1
1	A1	106	90.655	27108.2	-147.098	Target 1
1	A1	107	90.947	25444.6	-113.208	Target 1
1	A1	108	91.2389	25993.7	-57.0625	Target 1
1	A1	109	91.5308	26118.8	-17.7822	Target 1
1	A1	110	91.8228	25932	-14.9834	Target 1
1	A1	111	92.1147	25872	-41.6387	Target 1
1	A1	112	92.4067	26255.5	-73.1133	Target 1
1	A1	113	92.6986	25385.2	-85.3291	Target 1
1	A1	114	92.9906	25045	-70.8535	Target 1
1	A1	115	93.2825	25460.9	-43.6758	Target 1
1	A1	116	93.5744	23509.5	-30.5127	Target 1
1	A1	117	93.8664	25414.4	-54.1055	Target 1
1	A1	118	94.1583	25933.3	-118.938	Target 1
1	A1	119	94.4503	25101	-208.29	Target 1
1	A1	120	94.7422	25438.3	-294.271	Target 1
2	A2	1	60.0009	390069	8813.79	Target 1
2	A2	2	60.2928	388251	8925.27	Target 1
2	A2	3	60.5848	387033	9014.44	Target 1
2	A2	4	60.8767	382984	9061.75	Target 1
2	A2	5	61.1687	381470	9053.27	Target 1
2	A2	6	61.4606	376629	8999	Target 1
2	A2	7	61.7526	375451	8927.12	Target 1
2	A2	8	62.0445	371884	8868.87	Target 1
2	A2	9	62.3365	370637	8842.89	Target 1
2	A2	10	62.6284	367540	8849.09	Target 1
2	A2	11	62.9203	365285	8874.46	Target 1
2	A2	12	63.2123	362014	8905.17	Target 1
2	A2	13	63.5042	358396	8935.12	Target 1
2	A2	14	63.7962	356616	8965.31	Target 1
2	A2	15	64.0881	353824	8996.72	Target 1
2	A2	16	64.3801	351395	9023.75	Target 1
2	A2	17	64.672	348871	9035.44	Target 1
2	A2	18	64.9639	345034	9022.85	Target 1
2	A2	19	65.2559	342005	8986	Target 1
2	A2	20	65.5478	339271	8934.87	Target 1
2	A2	21	65.8398	337730	8883.64	Target 1
2	A2	22	66.1317	334048	8843.5	Target 1
2	A2	23	66.4237	331770	8805.86	Target 1
2	A2	24	66.7156	328366	8789.37	Target 1
2	A2	25	67.0076	326844	8786.12	Target 1
2	A2	26	67.2995	323208	8783.83	Target 1
2	A2	27	67.5914	320949	8769.79	Target 1
2	A2	28	67.8834	318180	8734.26	Target 1
2	A2	29	68.1753	314959	8675.52	Target 1
2	A2	30	68.4673	312688	8602.76	Target 1
2	A2	31	68.7592	309804	8534.79	Target 1
2	A2	32	69.0512	307067	8493.89	Target 1
2	A2	33	69.3431	306127	8498.01	Target 1
2	A2	34	69.635	301679	8553.73	Target 1
2	A2	35	69.927	299397	8651.68	Target 1
2	A2	36	70.2189	297971	8765.71	Target 1
2	A2	37	70.5109	295095	8852.25	Target 1
2	A2	38	70.8028	290622	8873.94	Target 1
2	A2	39	71.0948	288856	8846.2	Target 1
2	A2	40	71.3867	284452	8734.04	Target 1
2	A2	41	71.6787	283472	8578.66	Target 1
2	A2	42	71.9706	282263	8421.58	Target 1
2	A2	43	72.2625	276824	8296.61	Target 1
2	A2	44	72.5545	276381	8227.28	Target 1
2	A2	45	72.8464	272294	8228.68	Target 1
2	A2	46	73.1384	272013	8308.83	Target 1
2	A2	47	73.4303	268053	8465.01	Target 1
2	A2	48	73.7223	266222	8679.91	Target 1
2	A2	49	74.0142	261736	8894.54	Target 1
2	A2	50	74.3062	260010	9050.93	Target 1
2	A2	51	74.5981	256580	9198.1	Target 1
2	A2	52	74.89	253718	9336.33	Target 1
2	A2	53	75.182	250744	9471.74	Target 1
2	A2	54	75.4739	248575	9607.48	Target 1
2	A2	55	75.7659	245379	9737.56	Target 1
2	A2	56	76.0578	240956	9847.5	Target 1
2	A2	57	76.3498	237270	9921.21	Target 1
2	A2	58	76.6417	235657	9948.64	Target 1
2	A2	59	76.9336	232054	9928	Target 1
2	A2	60	77.2256	228356	9862.35	Target 1
2	A2	61	77.5175	225695	9755.25	Target 1
2	A2	62	77.8095	222798	9610.92	Target 1
2	A2	63	78.1014	218288	9438.85	Target 1
2	A2	64	78.3934	216772	9257.33	Target 1
2	A2	65	78.6853	214772	9089.65	Target 1
2	A2	66	78.9773	212910	8953.81	Target 1
2	A2	67	79.2692	208447	8853.1	Target 1
2	A2	68	79.5611	205643	8738.12	Target 1
2	A2	69	79.8531	203792	8629.25	Target 1
2	A2	70	80.145	201126	8522.75	Target 1
2	A2	71	80.437	198252	8433.87	Target 1
2	A2	72	80.7289	196637	8396.91	Target 1
2	A2	73	81.0209	194397	8449.1	Target 1
2	A2	74	81.3128	191265	8619.59	Target 1
2	A2	75	81.6048	188728	8901.64	Target 1
2	A2	76	81.8967	184643	9229.71	Target 1
2	A2	77	82.1886	183153	9763.79	Target 1
2	A2	78	82.4806	179877	10652.1	Target 1
2	A2	79	82.7725	176380	12121.2	Target 1
2	A2	80	83.0645	173799	14450.7	Target 1
2	A2	81	83.3564	167275	17898.4	Target 1
2	A2	82	83.6484	160605	22570.5	Target 1
2	A2	83	83.9403	148755	28263.3	Target 1
2	A2	84	84.2322	128677	34348.3	Target 1
2	A2	85	84.5242	92105	39796	Target 1
2	A2	86	84.8161	48879	43406.9	Target 1
2	A2	87	85.1081	23588.6	44203.8	Target 1
2	A2	88	85.4	17335.7	41822.7	Target 1
2	A2	89	85.692	17049.5	36693.1	Target 1
2	A2	90	85.9839	15582.7	29892.8	Target 1
2	A2	91	86.2758	15709.1	22748	Target 1
2	A2	92	86.5678	15331.6	16387.2	Target 1
2	A2	93	86.8597	14930.3	11455.6	Target 1
2	A2	94	87.1517	13988.1	7638.33	Target 1
2	A2	95	87.4436	13468.3	4382.22	Target 1
2	A2	96	87.7356	11634.9	2570.02	Target 1
2	A2	97	88.0275	13386.8	1612.96	Target 1
2	A2	98	88.3195	12829.2	1090.72	Target 1
2	A2	99	88.6114	12592.3	764.573	Target 1
2	A2	100	88.9034	11214.6	524.907	Target 1
2	A2	101	89.1953	11671.5	328.957	Target 1
2	A2	102	89.4872	12241.3	161.103	Target 1
2	A2	103	89.7792	11266.2	19.1143	Target 1
2	A2	104	90.0711	12967.6	-88.9521	Target 1
2	A2	105	90.3631	11155.5	-152.136	Target 1
2	A2	106	90.655	11225.6	-169.893	Target 1
2	A2	107	90.947	11239	-161.318	Target 1
2	A2	108	91.2389	10449.9	-160.884	Target 1
2	A2	109	91.5308	11270.5	-201.514	Target 1
2	A2	110	91.8228	10618.4	-295.27	Target 1
2	A2	111	92.1147	11908.2	-423.492	Target 1
2	A2	112	92.4067	11755.9	-542.394	Target 1
2	A2	113	92.6986	11604.7	-601.746	Target 1
2	A2	114	92.9906	11533.6	-568.129	Target 1
2	A2	115	93.2825	10954.5	-441.783	Target 1
2	A2	116	93.5744	9594.02	-258.352	Target 1
2	A2	117	93.8664	10418	-73.6328	Target 1
2	A2	118	94.1583	9491.7	61.5332	Target 1
2	A2	119	94.4503	10519.7	122.948	Target 1
2	A2	120	94.7422	10741	119.556	Target 1
3	A3	1	60.0009	383497	8736.24	Target 1
3	A3	2	60.2928	380511	8879.23	Target 1
3	A3	3	60.5848	378650	9049.85	Target 1
3	A3	4	60.8767	376162	9215.17	Target 1
3	A3	5	61.1687	376233	9331.91	Target 1
3	A3	6	61.4606	370018	9362.96	Target 1
3	A3	7	61.7526	368357	9342.67	Target 1
3	A3	8	62.0445	365136	9272.8	Target 1
3	A3	9	62.3365	362231	9194.28	Target 1
3	A3	10	62.6284	359716	9164.48	Target 1
3	A3	11	62.9203	356710	9206.62	Target 1
3	A3	12	63.2123	356003	9309.67	Target 1
3	A3	13	63.5042	351495	9399.72	Target 1
3	A3	14	63.7962	349653	9476.5	Target 1
3	A3	15	64.0881	344018	9530.07	Target 1
3	A3	16	64.3801	343433	9559.21	Target 1
3	A3	17	64.672	340263	9570.08	Target 1
3	A3	18	64.9639	336698	9567.88	Target 1
3	A3	19	65.2559	334264	9553.61	Target 1
3	A3	20	65.5478	330824	9526.14	Target 1
3	A3	21	65.8398	328004	9487.03	Target 1
3	A3	22	66.1317	324902	9442.44	Target 1
3	A3	23	66.4237	321646	9400.87	Target 1
3	A3	24	66.7156	320131	9368.8	Target 1
3	A3	25	67.0076	316326	9347.19	Target 1
3	A3	26	67.2995	313239	9331.27	Target 1
3	A3	27	67.5914	310817	9308.54	Target 1
3	A3	28	67.8834	308687	9272.04	Target 1
3	A3	29	68.1753	304074	9227.18	Target 1
3	A3	30	68.4673	301790	9185.3	Target 1
3	A3	31	68.7592	299642	9161.68	Target 1
3	A3	32	69.0512	297196	9166.05	Target 1
3	A3	33	69.3431	293942	9196.28	Target 1
3	A3	34	69.635	290690	9239.71	Target 1
3	A3	35	69.927	288342	9281.06	Target 1
3	A3	36	70.2189	285837	9311.95	Target 1
3	A3	37	70.5109	281583	9332.55	Target 1
3	A3	38	70.8028	280147	9356.68	Target 1
3	A3	39	71.0948	276163	9404.64	Target 1
3	A3	40	71.3867	274723	9491.76	Target 1
3	A3	41	71.6787	271140	9627.37	Target 1
3	A3	42	71.9706	268308	9810.46	Target 1
3	A3	43	72.2625	264021	10026.3	Target 1
3	A3	44	72.5545	262791	10243.8	Target 1
3	A3	45	72.8464	258947	10416.3	Target 1
3	A3	46	73.1384	254683	10494	Target 1
3	A3	47	73.4303	249461	10444.7	Target 1
3	A3	48	73.7223	244768	10276.1	Target 1
3	A3	49	74.0142	244521	10041.5	Target 1
3	A3	50	74.3062	241828	9820.61	Target 1
3	A3	51	74.5981	239335	9682.7	Target 1
3	A3	52	74.89	236281	9655.38	Target 1
3	A3	53	75.182	233307	9716.05	Target 1
3	A3	54	75.4739	229403	9810.24	Target 1
3	A3	55	75.7659	225340	9882.71	Target 1
3	A3	56	76.0578	223407	9902.29	Target 1
3	A3	57	76.3498	220154	9868.53	Target 1
3	A3	58	76.6417	217845	9801.44	Target 1
3	A3	59	76.9336	214005	9723.98	Target 1
3	A3	60	77.2256	211770	9648.88	Target 1
3	A3	61	77.5175	208948	9575.22	Target 1
3	A3	62	77.8095	204766	9493.8	Target 1
3	A3	63	78.1014	203375	9396.03	Target 1
3	A3	64	78.3934	199581	9259.66	Target 1
3	A3	65	78.6853	196969	9076.27	Target 1
3	A3	66	78.9773	195175	8909.73	Target 1
3	A3	67	79.2692	192334	8789.76	Target 1
3	A3	68	79.5611	189581	8738.19	Target 1
3	A3	69	79.8531	187251	8762.13	Target 1
3	A3	70	80.145	184220	8853.25	Target 1
3	A3	71	80.437	182024	8992.98	Target 1
3	A3	72	80.7289	178262	9162.11	Target 1
3	A3	73	81.0209	175949	9344.17	Target 1
3	A3	74	81.3128	172889	9504.05	Target 1
3	A3	75	81.6048	169679	9750.16	Target 1
3	A3	76	81.8967	166595	10191.9	Target 1
3	A3	77	82.1886	164877	11009	Target 1
3	A3	78	82.4806	161429	12452.1	Target 1
3	A3	79	82.7725	157320	14812	Target 1
3	A3	80	83.0645	153080	18339	Target 1
3	A3	81	83.3564	144727	23109.6	Target 1
3	A3	82	83.6484	134246	28871.3	Target 1
3	A3	83	83.9403	111384	34941.1	Target 1
3	A3	84	84.2322	75008.4	40256.7	Target 1
3	A3	85	84.5242	34226.9	43632.2	Target 1
3	A3	86	84.8161	12137.5	44158.9	Target 1
3	A3	87	85.1081	6419.45	41574	Target 1
3	A3	88	85.4	3967.07	36398.9	Target 1
3	A3	89	85.692	4625.15	29756	Target 1
3	A3	90	85.9839	2497.55	22954.5	Target 1
3	A3	91	86.2758	1279.55	17057.9	Target 1
3	A3	92	86.5678	-157.762	12627.5	Target 1
3	A3	93	86.8597	-2676.95	9711.4	Target 1
3	A3	94	87.1517	-5315.33	7346.39	Target 1
3	A3	95	87.4436	-5453.42	5978.45	Target 1
3	A3	96	87.7356	-7346.09	5226.51	Target 1
3	A3	97	88.0275	-8438.09	4692.8	Target 1
3	A3	98	88.3195	-10030.1	4164.65	Target 1
3	A3	99	88.6114	-10640.8	3565.37	Target 1
3	A3	100	88.9034	-9596.74	2899.94	Target 1
3	A3	101	89.1953	-10955.9	2216.28	Target 1
3	A3	102	89.4872	-10168.2	1579.84	Target 1
3	A3	103	89.7792	-9719.24	1052.48	Target 1
3	A3	104	90.0711	-11044.3	672.764	Target 1
3	A3	105	90.3631	-10707	443.204	Target 1
3	A3	106	90.655	-11228.3	330.904	Target 1
3	A3	107	90.947	-11947.1	282.527	Target 1
3	A3	108	91.2389	-11116.1	246.706	Target 1
3	A3	109	91.5308	-11572.5	193.112	Target 1
3	A3	110	91.8228	-11459.2	119.221	Target 1
3	A3	111	92.1147	-11388.4	42.5361	Target 1
3	A3	112	92.4067	-10889.7	-16.1855	Target 1
3	A3	113	92.6986	-12847.7	-48.5439	Target 1
3	A3	114	92.9906	-12299.3	-63.7529	Target 1
3	A3	115	93.2825	-11362.9	-81.0654	Target 1
3	A3	116	93.5744	-11713.7	-115.589	Target 1
3	A3	117	93.8664	-11758.9	-168.302	Target 1
3	A3	118	94.1583	-13083.6	-227.374	Target 1
3	A3	119	94.4503	-12263.2	-278.432	Target 1
3	A3	120	94.7422	-10815	-314.611	Target 1
4	A4	1	60.0009	259348	9570.34	Target 1
4	A4	2	60.2928	256481	9568.33	Target 1
4	A4	3	60.5848	254943	9563.06	Target 1
4	A4	4	60.8767	250422	9542.9	Target 1
4	A4	5	61.1687	249498	9503.32	Target 1
4	A4	6	61.4606	246574	9448.62	Target 1
4	A4	7	61.7526	242422	9389.68	Target 1
4	A4	8	62.0445	239577	9337.95	Target 1
4	A4	9	62.3365	238232	9299.89	Target 1
4	A4	10	62.6284	234572	9273.67	Target 1
4	A4	11	62.9203	231877	9251.23	Target 1
4	A4	12	63.2123	228810	9223.75	Target 1
4	A4	13	63.5042	225267	9187.38	Target 1
4	A4	14	63.7962	224045	9145.91	Target 1
4	A4	15	64.0881	219219	9108.44	Target 1
4	A4	16	64.3801	217498	9079.15	Target 1
4	A4	17	64.672	215587	9067.25	Target 1
4	A4	18	64.9639	211335	9075.97	Target 1
4	A4	19	65.2559	209841	9087.06	Target 1
4	A4	20	65.5478	207125	9082.8	Target 1
4	A4	21	65.8398	202179	9057.13	Target 1
4	A4	22	66.1317	200932	9021.09	Target 1
4	A4	23	66.4237	197878	8997.69	Target 1
4	A4	24	66.7156	195638	9010.65	Target 1
4	A4	25	67.0076	191783	9071.95	Target 1
4	A4	26	67.2995	190365	9140.73	Target 1
4	A4	27	67.5914	186779	9209.25	Target 1
4	A4	28	67.8834	184473	9262.12	Target 1
4	A4	29	68.1753	180855	9277.63	Target 1
4	A4	30	68.4673	177572	9245.54	Target 1
4	A4	31	68.7592	173982	9172.4	Target 1
4	A4	32	69.0512	172234	9070.89	Target 1
4	A4	33	69.3431	169920	8926.7	Target 1
4	A4	34	69.635	166259	8831.26	Target 1
4	A4	35	69.927	164187	8798.33	Target 1
4	A4	36	70.2189	162221	8815.08	Target 1
4	A4	37	70.5109	158627	8847.84	Target 1
4	A4	38	70.8028	156234	8856.97	Target 1
4	A4	39	71.0948	152408	8814.92	Target 1
4	A4	40	71.3867	150524	8721.11	Target 1
4	A4	41	71.6787	146664	8604.76	Target 1
4	A4	42	71.9706	145331	8513.57	Target 1
4	A4	43	72.2625	142809	8491.63	Target 1
4	A4	44	72.5545	140941	8558.43	Target 1
4	A4	45	72.8464	137118	8699.48	Target 1
4	A4	46	73.1384	135419	8874.23	Target 1
4	A4	47	73.4303	130713	9036.17	Target 1
4	A4	48	73.7223	128916	9129.46	Target 1
4	A4	49	74.0142	125269	9174.04	Target 1
4	A4	50	74.3062	122437	9209.13	Target 1
4	A4	51	74.5981	120127	9259.99	Target 1
4	A4	52	74.89	117608	9347.97	Target 1
4	A4	53	75.182	114944	9479.03	Target 1
4	A4	54	75.4739	111613	9638.67	Target 1
4	A4	55	75.7659	107563	9796.05	Target 1
4	A4	56	76.0578	104684	9915.15	Target 1
4	A4	57	76.3498	101589	9968.15	Target 1
4	A4	58	76.6417	96867.2	9945.12	Target 1
4	A4	59	76.9336	95291.8	9856.58	Target 1
4	A4	60	77.2256	91868.2	9728.55	Target 1
4	A4	61	77.5175	88564.4	9592.73	Target 1
4	A4	62	77.8095	86947.1	9475.37	Target 1
4	A4	63	78.1014	83435.2	9388.94	Target 1
4	A4	64	78.3934	80750.1	9329.32	Target 1
4	A4	65	78.6853	77691.1	9280.18	Target 1
4	A4	66	78.9773	74393.8	9222.45	Target 1
4	A4	67	79.2692	71143.8	9144.74	Target 1
4	A4	68	79.5611	69737.5	9020.47	Target 1
4	A4	69	79.8531	66263.7	8855.6	Target 1
4	A4	70	80.145	64403.4	8720.86	Target 1
4	A4	71	80.437	61561.5	8647.74	Target 1
4	A4	72	80.7289	58455.7	8658.44	Target 1
4	A4	73	81.0209	57152.6	8770.73	Target 1
4	A4	74	81.3128	53591	9014.67	Target 1
4	A4	75	81.6048	49752.2	9310.92	Target 1
4	A4	76	81.8967	48329.6	9781.59	Target 1
4	A4	77	82.1886	45779.9	10610.1	Target 1
4	A4	78	82.4806	41284.6	12027.8	Target 1
4	A4	79	82.7725	37762.7	14331.1	Target 1
4	A4	80	83.0645	33399.9	17814.5	Target 1
4	A4	81	83.3564	26431.8	22636.7	Target 1
4	A4	82	83.6484	16239.4	28639	Target 1
4	A4	83	83.9403	-6646.1	35197.5	Target 1
4	A4	84	84.2322	-46374.9	41225.7	Target 1
4	A4	85	84.5242	-97992.2	45411.1	Target 1
4	A4	86	84.8161	-127367	46646.3	Target 1
4	A4	87	85.1081	-133696	44471.9	Target 1
4	A4	88	85.4	-136278	39291.2	Target 1
4	A4	89	85.692	-136695	32228.1	Target 1
4	A4	90	85.9839	-137355	24697.4	Target 1
4	A4	91	86.2758	-138239	17919	Target 1
4	A4	92	86.5678	-137968	12604.2	Target 1
4	A4	93	86.8597	-138975	8786.38	Target 1
4	A4	94	87.1517	-139897	4905.52	Target 1
4	A4	95	87.4436	-140662	2678.15	Target 1
4	A4	96	87.7356	-139399	1465.39	Target 1
4	A4	97	88.0275	-139203	811.542	Target 1
4	A4	98	88.3195	-140137	455.756	Target 1
4	A4	99	88.6114	-140614	270.041	Target 1
4	A4	100	88.9034	-140359	187.723	Target 1
4	A4	101	89.1953	-141809	160.256	Target 1
4	A4	102	89.4872	-140855	148.218	Target 1
4	A4	103	89.7792	-140718	129.458	Target 1
4	A4	104	90.0711	-141718	103.122	Target 1
4	A4	105	90.3631	-141110	80.2812	Target 1
4	A4	106	90.655	-141889	67.834	Target 1
4	A4	107	90.947	-143466	59.0205	Target 1
4	A4	108	91.2389	-141508	37.6973	Target 1
4	A4	109	91.5308	-141780	-8.74805	Target 1
4	A4	110	91.8228	-142545	-79.6875	Target 1
4	A4	111	92.1147	-143145	-162.151	Target 1
4	A4	112	92.4067	-142109	-239.343	Target 1
4	A4	113	92.6986	-142155	-298.119	Target 1
4	A4	114	92.9906	-143130	-330.934	Target 1
4	A4	115	93.2825	-141462	-335.093	Target 1
4	A4	116	93.5744	-144166	-313.69	Target 1
4	A4	117	93.8664	-143493	-277.415	Target 1
4	A4	118	94.1583	-142372	-242.643	Target 1
4	A4	119	94.4503	-143787	-224.326	Target 1
4	A4	120	94.7422	-142481	-228.383	Target 1
5	A5	1	60.0009	316315	8947.54	Target 1
5	A5	2	60.2928	313854	8969.27	Target 1
5	A5	3	60.5848	312603	8988.48	Target 1
5	A5	4	60.8767	308599	8995.23	Target 1
5	A5	5	61.1687	306391	8986.89	Target 1
5	A5	6	61.4606	304391	8965.47	Target 1
5	A5	7	61.7526	301124	8932.39	Target 1
5	A5	8	62.0445	299646	8887.03	Target 1
5	A5	9	62.3365	295819	8830.15	Target 1
5	A5	10	62.6284	292098	8767.47	Target 1
5	A5	11	62.9203	290514	8709.02	Target 1
5	A5	12	63.2123	288415	8664.13	Target 1
5	A5	13	63.5042	284888	8636.71	Target 1
5	A5	14	63.7962	282704	8624.03	Target 1
5	A5	15	64.0881	279670	8618.83	Target 1
5	A5	16	64.3801	277494	8612.55	Target 1
5	A5	17	64.672	274616	8597.77	Target 1
5	A5	18	64.9639	272098	8570.4	Target 1
5	A5	19	65.2559	269335	8533.01	Target 1
5	A5	20	65.5478	266641	8490.52	Target 1
5	A5	21	65.8398	263099	8458.48	Target 1
5	A5	22	66.1317	261967	8462.85	Target 1
5	A5	23	66.4237	259930	8507.26	Target 1
5	A5	24	66.7156	255969	8559.07	Target 1
5	A5	25	67.0076	252880	8611.61	Target 1
5	A5	26	67.2995	252603	8644.89	Target 1
5	A5	27	67.5914	247452	8644.24	Target 1
5	A5	28	67.8834	245134	8606.16	Target 1
5	A5	29	68.1753	242872	8540.15	Target 1
5	A5	30	68.4673	239958	8448.93	Target 1
5	A5	31	68.7592	237372	8362.5	Target 1
5	A5	32	69.0512	235199	8312.36	Target 1
5	A5	33	69.3431	233368	8300.29	Target 1
5	A5	34	69.635	230262	8312.85	Target 1
5	A5	35	69.927	226810	8330.31	Target 1
5	A5	36	70.2189	224971	8336.18	Target 1
5	A5	37	70.5109	222616	8321.66	Target 1
5	A5	38	70.8028	219859	8285.02	Target 1
5	A5	39	71.0948	217144	8230.54	Target 1
5	A5	40	71.3867	214583	8169.42	Target 1
5	A5	41	71.6787	211458	8120.84	Target 1
5	A5	42	71.9706	210150	8107.71	Target 1
5	A5	43	72.2625	207896	8146.84	Target 1
5	A5	44	72.5545	205040	8238.76	Target 1
5	A5	45	72.8464	201844	8363.41	Target 1
5	A5	46	73.1384	200312	8485.72	Target 1
5	A5	47	73.4303	196682	8552.03	Target 1
5	A5	48	73.7223	193765	8566.72	Target 1
5	A5	49	74.0142	190182	8537.84	Target 1
5	A5	50	74.3062	188726	8478.74	Target 1
5	A5	51	74.5981	186410	8425.84	Target 1
5	A5	52	74.89	184528	8438.67	Target 1
5	A5	53	75.182	180436	8537.46	Target 1
5	A5	54	75.4739	179351	8691.09	Target 1
5	A5	55	75.7659	176214	8904.2	Target 1
5	A5	56	76.0578	173953	9147.98	Target 1
5	A5	57	76.3498	168586	9385.94	Target 1
5	A5	58	76.6417	167778	9580.48	Target 1
5	A5	59	76.9336	163524	9699.22	Target 1
5	A5	60	77.2256	159804	9720.45	Target 1
5	A5	61	77.5175	157140	9637.54	Target 1
5	A5	62	77.8095	153952	9462.01	Target 1
5	A5	63	78.1014	150675	9223.3	Target 1
5	A5	64	78.3934	149056	8963.84	Target 1
5	A5	65	78.6853	146777	8728.44	Target 1
5	A5	66	78.9773	143923	8551.84	Target 1
5	A5	67	79.2692	141592	8425.78	Target 1
5	A5	68	79.5611	139704	8373.82	Target 1
5	A5	69	79.8531	136004	8378	Target 1
5	A5	70	80.145	133174	8395.74	Target 1
5	A5	71	80.437	131486	8392.89	Target 1
5	A5	72	80.7289	128590	8355.98	Target 1
5	A5	73	81.0209	125414	8298.21	Target 1
5	A5	74	81.3128	124166	8261.37	Target 1
5	A5	75	81.6048	120854	8318.44	Target 1
5	A5	76	81.8967	119258	8561.09	Target 1
5	A5	77	82.1886	117182	9019.5	Target 1
5	A5	78	82.4806	113669	9921.14	Target 1
5	A5	79	82.7725	111078	11508.3	Target 1
5	A5	80	83.0645	107847	14081.7	Target 1
5	A5	81	83.3564	102489	17942.4	Target 1
5	A5	82	83.6484	96375.1	23262.2	Target 1
5	A5	83	83.9403	85539.4	29900.2	Target 1
5	A5	84	84.2322	66481	37236.8	Target 1
5	A5	85	84.5242	32610.7	44147.2	Target 1
5	A5	86	84.8161	-14370	49211.8	Target 1
5	A5	87	85.1081	-46420.4	51151.1	Target 1
5	A5	88	85.4	-56252.5	49316.2	Target 1
5	A5	89	85.692	-59036.6	43983.8	Target 1
5	A5	90	85.9839	-59152	36279.8	Target 1
5	A5	91	86.2758	-58718.3	27760	Target 1
5	A5	92	86.5678	-59913.4	19865.6	Target 1
5	A5	93	86.8597	-60414.4	13521	Target 1
5	A5	94	87.1517	-61183.1	9017.46	Target 1
5	A5	95	87.4436	-61757.9	5250.5	Target 1
5	A5	96	87.7356	-61760.9	2952.99	Target 1
5	A5	97	88.0275	-61557.9	1698.21	Target 1
5	A5	98	88.3195	-62304.9	1016.65	Target 1
5	A5	99	88.6114	-62221.7	624.723	Target 1
5	A5	100	88.9034	-62202.7	381.788	Target 1
5	A5	101	89.1953	-62528.9	229.645	Target 1
5	A5	102	89.4872	-61925.3	145.693	Target 1
5	A5	103	89.7792	-63022.5	116.025	Target 1
5	A5	104	90.0711	-63218.6	123.784	Target 1
5	A5	105	90.3631	-63452.9	147.794	Target 1
5	A5	106	90.655	-63077.8	167.539	Target 1
5	A5	107	90.947	-63292.3	169.539	Target 1
5	A5	108	91.2389	-63880.8	150.314	Target 1
5	A5	109	91.5308	-64389.1	114.704	Target 1
5	A5	110	91.8228	-63504.1	72.4375	Target 1
5	A5	111	92.1147	-63766	35.5957	Target 1
5	A5	112	92.4067	-63608	15.7012	Target 1
5	A5	113	92.6986	-64566.7	17.959	Target 1
5	A5	114	92.9906	-65200	34.7148	Target 1
5	A5	115	93.2825	-64764.4	44.9697	Target 1
5	A5	116	93.5744	-64735.8	24.3008	Target 1
5	A5	117	93.8664	-64774.6	-39.835	Target 1
5	A5	118	94.1583	-64287	-138.919	Target 1
5	A5	119	94.4503	-64628.6	-247.96	Target 1
5	A5	120	94.7422	-64324.4	-340.416	Target 1
6	A6	1	60.0009	388544	8386.45	Target 1
6	A6	2	60.2928	386678	8456.07	Target 1
6	A6	3	60.5848	385057	8541.34	Target 1
6	A6	4	60.8767	381904	8641.67	Target 1
6	A6	5	61.1687	379260	8751.05	Target 1
6	A6	6	61.4606	377171	8855.61	Target 1
6	A6	7	61.7526	375453	8932.34	Target 1
6	A6	8	62.0445	371540	8956.03	Target 1
6	A6	9	62.3365	368350	8913.95	Target 1
6	A6	10	62.6284	365153	8818.04	Target 1
6	A6	11	62.9203	361282	8705.12	Target 1
6	A6	12	63.2123	360236	8623.32	Target 1
6	A6	13	63.5042	356618	8610.84	Target 1
6	A6	14	63.7962	354964	8680.02	Target 1
6	A6	15	64.0881	352709	8814.31	Target 1
6	A6	16	64.3801	349037	8979.2	Target 1
6	A6	17	64.672	346910	9140.36	Target 1
6	A6	18	64.9639	342364	9278.02	Target 1
6	A6	19	65.2559	339859	9390.42	Target 1
6	A6	20	65.5478	336820	9486.34	Target 1
6	A6	21	65.8398	333805	9571.83	Target 1
6	A6	22	66.1317	331699	9639.74	Target 1
6	A6	23	66.4237	326071	9667.35	Target 1
6	A6	24	66.7156	324438	9622.03	Target 1
6	A6	25	67.0076	320984	9474.07	Target 1
6	A6	26	67.2995	317130	9212.76	Target 1
6	A6	27	67.5914	314156	8859.47	Target 1
6	A6	28	67.8834	308112	8468.24	Target 1
6	A6	29	68.1753	309894	8000.35	Target 1
6	A6	30	68.4673	307296	7629.85	Target 1
6	A6	31	68.7592	305067	7415.38	Target 1
6	A6	32	69.0512	301687	7333.66	Target 1
6	A6	33	69.3431	300671	7326.68	Target 1
6	A6	34	69.635	297078	7334.88	Target 1
6	A6	35	69.927	294810	7323.66	Target 1
6	A6	36	70.2189	292291	7290.98	Target 1
6	A6	37	70.5109	290106	7257.96	Target 1
6	A6	38	70.8028	288735	7250.41	Target 1
6	A6	39	71.0948	285626	7284.22	Target 1
6	A6	40	71.3867	283838	7360.13	Target 1
6	A6	41	71.6787	280349	7468.79	Target 1
6	A6	42	71.9706	278960	7597.96	Target 1
6	A6	43	72.2625	276200	7736.65	Target 1
6	A6	44	72.5545	273292	7873.17	Target 1
6	A6	45	72.8464	271168	7993.07	Target 1
6	A6	46	73.1384	269080	8082.35	Target 1
6	A6	47	73.4303	264539	8137.44	Target 1
6	A6	48	73.7223	262096	8175.4	Target 1
6	A6	49	74.0142	260123	8233.39	Target 1
6	A6	50	74.3062	258513	8352.14	Target 1
6	A6	51	74.5981	255501	8508.28	Target 1
6	A6	52	74.89	252592	8694.65	Target 1
6	A6	53	75.182	249025	8883.19	Target 1
6	A6	54	75.4739	245836	9027.65	Target 1
6	A6	55	75.7659	242385	9099.71	Target 1
6	A6	56	76.0578	239531	9102.26	Target 1
6	A6	57	76.3498	237082	9064.03	Target 1
6	A6	58	76.6417	235730	9019.24	Target 1
6	A6	59	76.9336	232066	8986.19	Target 1
6	A6	60	77.2256	228392	8958.35	Target 1
6	A6	61	77.5175	225203	8913.11	Target 1
6	A6	62	77.8095	222705	8830.54	Target 1
6	A6	63	78.1014	219643	8707.67	Target 1
6	A6	64	78.3934	218058	8559.48	Target 1
6	A6	65	78.6853	215112	8407.58	Target 1
6	A6	66	78.9773	212752	8218.54	Target 1
6	A6	67	79.2692	208898	8047.37	Target 1
6	A6	68	79.5611	208184	7894.49	Target 1
6	A6	69	79.8531	204370	7759.53	Target 1
6	A6	70	80.145	202443	7652.79	Target 1
6	A6	71	80.437	200947	7592.79	Target 1
6	A6	72	80.7289	198147	7596.91	Target 1
6	A6	73	81.0209	195884	7673.72	Target 1
6	A6	74	81.3128	192565	7825.02	Target 1
6	A6	75	81.6048	190642	8060.86	Target 1
6	A6	76	81.8967	187813	8418.66	Target 1
6	A6	77	82.1886	185386	8863.01	Target 1
6	A6	78	82.4806	182122	9647.84	Target 1
6	A6	79	82.7725	179354	11029.2	Target 1
6	A6	80	83.0645	176691	13343.8	Target 1
6	A6	81	83.3564	173651	16938.1	Target 1
6	A6	82	83.6484	166840	22024.9	Target 1
6	A6	83	83.9403	156206	28489.8	Target 1
6	A6	84	84.2322	136827	35726	Target 1
6	A6	85	84.5242	105071	42613.9	Target 1
6	A6	86	84.8161	58204.7	47737	Target 1
6	A6	87	85.1081	27026.9	49812.2	Target 1
6	A6	88	85.4	14220	48172.6	Target 1
6	A6	89	85.692	13752.2	43059.7	Target 1
6	A6	90	85.9839	12832	35555.5	Target 1
6	A6	91	86.2758	12464.2	27179.7	Target 1
6	A6	92	86.5678	12350.9	19361.1	Target 1
6	A6	93	86.8597	12013.7	13038.9	Target 1
6	A6	94	87.1517	12559.3	8537.9	Target 1
6	A6	95	87.4436	10965.2	4669.54	Target 1
6	A6	96	87.7356	10424.2	2445.75	Target 1
6	A6	97	88.0275	9963.12	1291.48	Target 1
6	A6	98	88.3195	10630.2	711.72	Target 1
6	A6	99	88.6114	10765.1	399.822	Target 1
6	A6	100	88.9034	10156.6	208.366	Target 1
6	A6	101	89.1953	10106	85.5078	Target 1
6	A6	102	89.4872	9185.92	15.0088	Target 1
6	A6	103	89.7792	9812.46	-19.541	Target 1
6	A6	104	90.0711	10109.4	-44.0586	Target 1
6	A6	105	90.3631	7804.22	-86.6279	Target 1
6	A6	106	90.655	8441.46	-165.199	Target 1
6	A6	107	90.947	10406.7	-278.186	Target 1
6	A6	108	91.2389	9857.37	-402.494	Target 1
6	A6	109	91.5308	8898.46	-501.372	Target 1
6	A6	110	91.8228	8600.79	-540.193	Target 1
6	A6	111	92.1147	10376.2	-502.751	Target 1
6	A6	112	92.4067	9106.54	-399.575	Target 1
6	A6	113	92.6986	7504.56	-265.029	Target 1
6	A6	114	92.9906	7559.11	-145.533	Target 1
6	A6	115	93.2825	8465.56	-82.9912	Target 1
6	A6	116	93.5744	8124.41	-98.1436	Target 1
6	A6	117	93.8664	8120.75	-180.934	Target 1
6	A6	118	94.1583	8675.51	-294.869	Target 1
6	A6	119	94.4503	8333.6	-395.205	Target 1
6	A6	120	94.7422	8496.55	-450.526	Target 1
7	A7	1	60.0009	481644	11238.3	Target 2
7	A7	2	60.2928	478688	11248.1	Target 2
7	A7	3	60.5848	474810	11263.6	Target 2
7	A7	4	60.8767	472463	11276.2	Target 2
7	A7	5	61.1687	470178	11279.5	Target 2
7	A7	6	61.4606	465264	11269.4	Target 2
7	A7	7	61.7526	463342	11243.4	Target 2
7	A7	8	62.0445	458644	11200.4	Target 2
7	A7	9	62.3365	455936	11142	Target 2
7	A7	10	62.6284	451127	11071.6	Target 2
7	A7	11	62.9203	448882	10994.2	Target 2
7	A7	12	63.2123	445716	10916.4	Target 2
7	A7	13	63.5042	441478	10847.2	Target 2
7	A7	14	63.7962	438283	10779.4	Target 2
7	A7	15	64.0881	433909	10773.1	Target 2
7	A7	16	64.3801	433468	10837.2	Target 2
7	A7	17	64.672	428878	10918	Target 2
7	A7	18	64.9639	425982	11005.9	Target 2
7	A7	19	65.2559	421644	11079.1	Target 2
7	A7	20	65.5478	418258	11117.4	Target 2
7	A7	21	65.8398	414903	11114.2	Target 2
7	A7	22	66.1317	410826	11076.5	Target 2
7	A7	23	66.4237	407476	11021.4	Target 2
7	A7	24	66.7156	404750	10968.5	Target 2
7	A7	25	67.0076	399741	10935.5	Target 2
7	A7	26	67.2995	398704	10932.4	Target 2
7	A7	27	67.5914	394148	10959.6	Target 2
7	A7	28	67.8834	390054	11006.9	Target 2
7	A7	29	68.1753	387877	11055.5	Target 2
7	A7	30	68.4673	385202	11084.8	Target 2
7	A7	31	68.7592	378538	11081.5	Target 2
7	A7	32	69.0512	376458	11046.1	Target 2
7	A7	33	69.3431	372941	10993.5	Target 2
7	A7	34	69.635	370487	10945	Target 2
7	A7	35	69.927	366479	10916	Target 2
7	A7	36	70.2189	363026	10908.6	Target 2
7	A7	37	70.5109	360247	10910.8	Target 2
7	A7	38	70.8028	356996	10905	Target 2
7	A7	39	71.0948	352222	10879.8	Target 2
7	A7	40	71.3867	348442	10829.9	Target 2
7	A7	41	71.6787	346640	10762.5	Target 2
7	A7	42	71.9706	343313	10726.5	Target 2
7	A7	43	72.2625	340280	10741.8	Target 2
7	A7	44	72.5545	335707	10804.7	Target 2
7	A7	45	72.8464	333747	10875.4	Target 2
7	A7	46	73.1384	329572	10919.6	Target 2
7	A7	47	73.4303	325526	10935.1	Target 2
7	A7	48	73.7223	322246	10913.2	Target 2
7	A7	49	74.0142	318335	10858.1	Target 2
7	A7	50	74.3062	315568	10743.9	Target 2
7	A7	51	74.5981	312540	10620.5	Target 2
7	A7	52	74.89	309574	10509.8	Target 2
7	A7	53	75.182	305848	10418	Target 2
7	A7	54	75.4739	302396	10343.3	Target 2
7	A7	55	75.7659	299957	10283.9	Target 2
7	A7	56	76.0578	296909	10242.4	Target 2
7	A7	57	76.3498	293556	10223.7	Target 2
7	A7	58	76.6417	291173	10229.4	Target 2
7	A7	59	76.9336	287070	10254	Target 2
7	A7	60	77.2256	284182	10287.2	Target 2
7	A7	61	77.5175	281050	10318.5	Target 2
7	A7	62	77.8095	278286	10341.1	Target 2
7	A7	63	78.1014	274319	10351.3	Target 2
7	A7	64	78.3934	271291	10345.1	Target 2
7	A7	65	78.6853	268935	10316.3	Target 2
7	A7	66	78.9773	265240	10259.1	Target 2
7	A7	67	79.2692	260678	10174.3	Target 2
7	A7	68	79.5611	258731	10076.1	Target 2
7	A7	69	79.8531	256450	9991.4	Target 2
7	A7	70	80.145	253387	9950.9	Target 2
7	A7	71	80.437	250120	9976.34	Target 2
7	A7	72	80.7289	246193	10073.8	Target 2
7	A7	73	81.0209	243740	10237.6	Target 2
7	A7	74	81.3128	240432	10459.3	Target 2
7	A7	75	81.6048	237547	10735.6	Target 2
7	A7	76	81.8967	233664	10989.9	Target 2
7	A7	77	82.1886	230312	11250.4	Target 2
7	A7	78	82.4806	225065	11595.4	Target 2
7	A7	79	82.7725	222717	12109.3	Target 2
7	A7	80	83.0645	218720	12958.1	Target 2
7	A7	81	83.3564	214826	14412.6	Target 2
7	A7	82	83.6484	210293	16839.3	Target 2
7	A7	83	83.9403	204925	20629.9	Target 2
7	A7	84	84.2322	196884	26046.5	Target 2
7	A7	85	84.5242	186661	32997.6	Target 2
7	A7	86	84.8161	164197	40833.3	Target 2
7	A7	87	85.1081	117714	48303.7	Target 2
7	A7	88	85.4	51509.2	53805.3	Target 2
7	A7	89	85.692	17481.1	55896	Target 2
7	A7	90	85.9839	9975.32	53867	Target 2
7	A7	91	86.2758	8949.32	48064.9	Target 2
7	A7	92	86.5678	8088.01	39765.1	Target 2
7	A7	93	86.8597	6158.81	30662.9	Target 2
7	A7	94	87.1517	5336.27	22264.2	Target 2
7	A7	95	87.4436	4680.23	15482.5	Target 2
7	A7	96	87.7356	5225.75	10410.2	Target 2
7	A7	97	88.0275	6879.1	5269.07	Target 2
7	A7	98	88.3195	7616.25	2120.67	Target 2
7	A7	99	88.6114	7174.08	336.678	Target 2
7	A7	100	88.9034	6948.7	-565.142	Target 2
7	A7	101	89.1953	6847.51	-915.266	Target 2
7	A7	102	89.4872	8152.06	-932.593	Target 2
7	A7	103	89.7792	7147.43	-760.879	Target 2
7	A7	104	90.0711	7327.94	-493.637	Target 2
7	A7	105	90.3631	5892.89	-194.825	Target 2
7	A7	106	90.655	5790.64	84.1592	Target 2
7	A7	107	90.947	5512.98	297.639	Target 2
7	A7	108	91.2389	5139.86	411.226	Target 2
7	A7	109	91.5308	4917.82	412.589	Target 2
7	A7	110	91.8228	5343.08	316.749	Target 2
7	A7	111	92.1147	5207.2	160.398	Target 2
7	A7	112	92.4067	5337.59	-12.2539	Target 2
7	A7	113	92.6986	5006.18	-165.124	Target 2
7	A7	114	92.9906	5062.67	-280.773	Target 2
7	A7	115	93.2825	5119.87	-362.386	Target 2
7	A7	116	93.5744	4631.04	-427.602	Target 2
7	A7	117	93.8664	5129.09	-497.896	Target 2
7	A7	118	94.1583	5056.39	-588.552	Target 2
7	A7	119	94.4503	5728.71	-703.439	Target 2
7	A7	120	94.7422	4992.1	-836.035	Target 2
8	A8	1	60.0009	407446	8611.73	Target 2
8	A8	2	60.2928	403959	8736.69	Target 2
8	A8	3	60.5848	402192	8858.8	Target 2
8	A8	4	60.8767	399624	8925.04	Target 2
8	A8	5	61.1687	398196	8966.22	Target 2
8	A8	6	61.4606	394848	8993.12	Target 2
8	A8	7	61.7526	391627	9010.11	Target 2
8	A8	8	62.0445	389547	9023.35	Target 2
8	A8	9	62.3365	387138	9038.29	Target 2
8	A8	10	62.6284	383176	9057.89	Target 2
8	A8	11	62.9203	381936	9082.61	Target 2
8	A8	12	63.2123	377942	9111.35	Target 2
8	A8	13	63.5042	375843	9142.97	Target 2
8	A8	14	63.7962	371922	9176.28	Target 2
8	A8	15	64.0881	370493	9209.12	Target 2
8	A8	16	64.3801	366879	9237.12	Target 2
8	A8	17	64.672	364055	9254.21	Target 2
8	A8	18	64.9639	360996	9254.86	Target 2
8	A8	19	65.2559	358663	9237.57	Target 2
8	A8	20	65.5478	354683	9206.41	Target 2
8	A8	21	65.8398	351426	9169.36	Target 2
8	A8	22	66.1317	350115	9134.25	Target 2
8	A8	23	66.4237	347077	9104.54	Target 2
8	A8	24	66.7156	343270	9078.6	Target 2
8	A8	25	67.0076	340340	9052.12	Target 2
8	A8	26	67.2995	339281	9022.19	Target 2
8	A8	27	67.5914	334634	8990.03	Target 2
8	A8	28	67.8834	331937	8960.94	Target 2
8	A8	29	68.1753	329984	8941.61	Target 2
8	A8	30	68.4673	327971	8936.04	Target 2
8	A8	31	68.7592	323322	8942.78	Target 2
8	A8	32	69.0512	322344	8954.87	Target 2
8	A8	33	69.3431	318735	8962.78	Target 2
8	A8	34	69.635	316170	8959.13	Target 2
8	A8	35	69.927	312974	8942.24	Target 2
8	A8	36	70.2189	309897	8916.52	Target 2
8	A8	37	70.5109	308562	8889.55	Target 2
8	A8	38	70.8028	304720	8855.89	Target 2
8	A8	39	71.0948	303267	8829.48	Target 2
8	A8	40	71.3867	299213	8818.45	Target 2
8	A8	41	71.6787	296631	8825.83	Target 2
8	A8	42	71.9706	294520	8858.58	Target 2
8	A8	43	72.2625	291959	8902.71	Target 2
8	A8	44	72.5545	289357	8947.37	Target 2
8	A8	45	72.8464	286539	8988.37	Target 2
8	A8	46	73.1384	283293	9005.78	Target 2
8	A8	47	73.4303	279439	8984.5	Target 2
8	A8	48	73.7223	277051	8923.51	Target 2
8	A8	49	74.0142	274476	8800.91	Target 2
8	A8	50	74.3062	272498	8641.55	Target 2
8	A8	51	74.5981	269682	8521.05	Target 2
8	A8	52	74.89	267385	8456.67	Target 2
8	A8	53	75.182	265219	8439.05	Target 2
8	A8	54	75.4739	261010	8441.94	Target 2
8	A8	55	75.7659	259947	8437.26	Target 2
8	A8	56	76.0578	257202	8407.53	Target 2
8	A8	57	76.3498	254159	8350.93	Target 2
8	A8	58	76.6417	251550	8279.6	Target 2
8	A8	59	76.9336	249615	8213.09	Target 2
8	A8	60	77.2256	248203	8169.87	Target 2
8	A8	61	77.5175	243997	8159.82	Target 2
8	A8	62	77.8095	242595	8180.14	Target 2
8	A8	63	78.1014	239745	8216.28	Target 2
8	A8	64	78.3934	237377	8246.98	Target 2
8	A8	65	78.6853	234567	8251.56	Target 2
8	A8	66	78.9773	232133	8217.73	Target 2
8	A8	67	79.2692	228715	8148.18	Target 2
8	A8	68	79.5611	227709	8063.16	Target 2
8	A8	69	79.8531	224633	7996.1	Target 2
8	A8	70	80.145	222803	7981.63	Target 2
8	A8	71	80.437	220910	8040.99	Target 2
8	A8	72	80.7289	217515	8172.93	Target 2
8	A8	73	81.0209	214989	8354.87	Target 2
8	A8	74	81.3128	212336	8555.49	Target 2
8	A8	75	81.6048	209432	8751.38	Target 2
8	A8	76	81.8967	206833	8914.75	Target 2
8	A8	77	82.1886	203824	9036.27	Target 2
8	A8	78	82.4806	201831	9222.77	Target 2
8	A8	79	82.7725	197976	9558.78	Target 2
8	A8	80	83.0645	196247	10181.5	Target 2
8	A8	81	83.3564	192587	11294.3	Target 2
8	A8	82	83.6484	188603	13159.8	Target 2
8	A8	83	83.9403	184644	16049	Target 2
8	A8	84	84.2322	178476	20124.7	Target 2
8	A8	85	84.5242	169158	25275.2	Target 2
8	A8	86	84.8161	148727	30972.1	Target 2
8	A8	87	85.1081	104829	36261.4	Target 2
8	A8	88	85.4	53681.2	39971.4	Target 2
8	A8	89	85.692	27330.6	41104.1	Target 2
8	A8	90	85.9839	24216.6	39240.1	Target 2
8	A8	91	86.2758	22869	34733.7	Target 2
8	A8	92	86.5678	21373.2	28580.6	Target 2
8	A8	93	86.8597	22047.3	22029.1	Target 2
8	A8	94	87.1517	21946.8	16147.1	Target 2
8	A8	95	87.4436	21873.5	11552.3	Target 2
8	A8	96	87.7356	20821.5	7952.09	Target 2
8	A8	97	88.0275	20848.5	4330.42	Target 2
8	A8	98	88.3195	20373.4	2318.86	Target 2
8	A8	99	88.6114	20190.6	1290.99	Target 2
8	A8	100	88.9034	19836.9	781.744	Target 2
8	A8	101	89.1953	20675.5	511.148	Target 2
8	A8	102	89.4872	19288.7	343.484	Target 2
8	A8	103	89.7792	20636	229.119	Target 2
8	A8	104	90.0711	19485.9	156.191	Target 2
8	A8	105	90.3631	19213.2	121.562	Target 2
8	A8	106	90.655	19757.7	119.362	Target 2
8	A8	107	90.947	19281.5	140.112	Target 2
8	A8	108	91.2389	19287.1	172.863	Target 2
8	A8	109	91.5308	18770.1	206.362	Target 2
8	A8	110	91.8228	17688.5	229.728	Target 2
8	A8	111	92.1147	19175.4	235.023	Target 2
8	A8	112	92.4067	18609.7	221.178	Target 2
8	A8	113	92.6986	18539.6	195.036	Target 2
8	A8	114	92.9906	17696.3	166.249	Target 2
8	A8	115	93.2825	17866.9	138.815	Target 2
8	A8	116	93.5744	18052.8	107.03	Target 2
8	A8	117	93.8664	16431.6	60.4902	Target 2
8	A8	118	94.1583	18570.7	-5.68359	Target 2
8	A8	119	94.4503	18492.8	-84.5605	Target 2
8	A8	120	94.7422	18250.7	-160.665	Target 2
9	A9	1	60.0009	412250	9378.5	Target 2
9	A9	2	60.2928	409054	9377.53	Target 2
9	A9	3	60.5848	407443	9374.85	Target 2
9	A9	4	60.8767	404086	9366.78	Target 2
9	A9	5	61.1687	402058	9354.97	Target 2
9	A9	6	61.4606	398552	9343.92	Target 2
9	A9	7	61.7526	396435	9337.52	Target 2
9	A9	8	62.0445	393894	9336.75	Target 2
9	A9	9	62.3365	390126	9340.5	Target 2
9	A9	10	62.6284	387024	9345.91	Target 2
9	A9	11	62.9203	383957	9347.59	Target 2
9	A9	12	63.2123	382549	9337.25	Target 2
9	A9	13	63.5042	378343	9306.58	Target 2
9	A9	14	63.7962	375038	9253.84	Target 2
9	A9	15	64.0881	372464	9161.46	Target 2
9	A9	16	64.3801	368556	9071.31	Target 2
9	A9	17	64.672	367118	9032.23	Target 2
9	A9	18	64.9639	364298	9062.7	Target 2
9	A9	19	65.2559	361327	9154.07	Target 2
9	A9	20	65.5478	359272	9259.51	Target 2
9	A9	21	65.8398	355184	9331.92	Target 2
9	A9	22	66.1317	351636	9389.71	Target 2
9	A9	23	66.4237	349278	9432.6	Target 2
9	A9	24	66.7156	346244	9467.48	Target 2
9	A9	25	67.0076	342851	9499.64	Target 2
9	A9	26	67.2995	340921	9526.94	Target 2
9	A9	27	67.5914	336756	9540.46	Target 2
9	A9	28	67.8834	333135	9530.31	Target 2
9	A9	29	68.1753	330918	9491.44	Target 2
9	A9	30	68.4673	327370	9426.75	Target 2
9	A9	31	68.7592	323860	9346.02	Target 2
9	A9	32	69.0512	322289	9263.44	Target 2
9	A9	33	69.3431	318010	9169.76	Target 2
9	A9	34	69.635	315798	9102.01	Target 2
9	A9	35	69.927	313221	9090.88	Target 2
9	A9	36	70.2189	310090	9130.84	Target 2
9	A9	37	70.5109	308634	9197.55	Target 2
9	A9	38	70.8028	303773	9247.77	Target 2
9	A9	39	71.0948	301290	9263.15	Target 2
9	A9	40	71.3867	297129	9256.45	Target 2
9	A9	41	71.6787	295812	9244.07	Target 2
9	A9	42	71.9706	292343	9253.16	Target 2
9	A9	43	72.2625	290002	9309.43	Target 2
9	A9	44	72.5545	287507	9427.43	Target 2
9	A9	45	72.8464	282862	9608.04	Target 2
9	A9	46	73.1384	281908	9841.98	Target 2
9	A9	47	73.4303	276228	10114.7	Target 2
9	A9	48	73.7223	273320	10407.1	Target 2
9	A9	49	74.0142	270451	10691.6	Target 2
9	A9	50	74.3062	265217	10926.9	Target 2
9	A9	51	74.5981	262430	11060.7	Target 2
9	A9	52	74.89	256474	11043	Target 2
9	A9	53	75.182	250104	10848.3	Target 2
9	A9	54	75.4739	249906	10492.9	Target 2
9	A9	55	75.7659	246478	10033.8	Target 2
9	A9	56	76.0578	243979	9550.1	Target 2
9	A9	57	76.3498	241752	9038.25	Target 2
9	A9	58	76.6417	239408	8475.11	Target 2
9	A9	59	76.9336	237244	8075.67	Target 2
9	A9	60	77.2256	234722	7815.07	Target 2
9	A9	61	77.5175	231002	7654.31	Target 2
9	A9	62	77.8095	230627	7560.6	Target 2
9	A9	63	78.1014	227215	7515.04	Target 2
9	A9	64	78.3934	226064	7508.68	Target 2
9	A9	65	78.6853	221612	7534.56	Target 2
9	A9	66	78.9773	221004	7582.79	Target 2
9	A9	67	79.2692	217462	7640.84	Target 2
9	A9	68	79.5611	215903	7696.5	Target 2
9	A9	69	79.8531	212467	7742.22	Target 2
9	A9	70	80.145	209795	7778.88	Target 2
9	A9	71	80.437	208085	7817.89	Target 2
9	A9	72	80.7289	205621	7878.39	Target 2
9	A9	73	81.0209	203363	7979.79	Target 2
9	A9	74	81.3128	200477	8133.47	Target 2
9	A9	75	81.6048	197366	8342	Target 2
9	A9	76	81.8967	195051	8611.34	Target 2
9	A9	77	82.1886	192235	8977.46	Target 2
9	A9	78	82.4806	188008	9423.63	Target 2
9	A9	79	82.7725	186749	10022	Target 2
9	A9	80	83.0645	184304	11084	Target 2
9	A9	81	83.3564	178857	12900.4	Target 2
9	A9	82	83.6484	176362	15791	Target 2
9	A9	83	83.9403	171299	19987.8	Target 2
9	A9	84	84.2322	161216	25460.5	Target 2
9	A9	85	84.5242	144994	31745	Target 2
9	A9	86	84.8161	109592	37888.4	Target 2
9	A9	87	85.1081	57106.9	42613.8	Target 2
9	A9	88	85.4	20488.9	44710.4	Target 2
9	A9	89	85.692	13661.6	43499.9	Target 2
9	A9	90	85.9839	11037.2	39139.9	Target 2
9	A9	91	86.2758	11084.4	32583.1	Target 2
9	A9	92	86.5678	11868.4	25206.4	Target 2
9	A9	93	86.8597	11193.1	18311.2	Target 2
9	A9	94	87.1517	10928	12746.4	Target 2
9	A9	95	87.4436	9767.63	8519.3	Target 2
9	A9	96	87.7356	10497.4	4448.93	Target 2
9	A9	97	88.0275	11191.3	2142.62	Target 2
9	A9	98	88.3195	9808.89	959.639	Target 2
9	A9	99	88.6114	9974.84	402.578	Target 2
9	A9	100	88.9034	9329.43	154.561	Target 2
9	A9	101	89.1953	9872.45	44.3389	Target 2
9	A9	102	89.4872	10615.3	-5.18652	Target 2
9	A9	103	89.7792	9040.54	-20.6855	Target 2
9	A9	104	90.0711	9417.7	-10.5518	Target 2
9	A9	105	90.3631	9132.6	14.8594	Target 2
9	A9	106	90.655	8672.77	37.123	Target 2
9	A9	107	90.947	8198.42	36.8213	Target 2
9	A9	108	91.2389	9761.51	5.9043	Target 2
9	A9	109	91.5308	8563.11	-45.3447	Target 2
9	A9	110	91.8228	8444.57	-92.5078	Target 2
9	A9	111	92.1147	9118.88	-109.794	Target 2
9	A9	112	92.4067	8572.35	-83.6094	Target 2
9	A9	113	92.6986	7726.79	-19.54	Target 2
9	A9	114	92.9906	7294.12	60.2568	Target 2
9	A9	115	93.2825	7855.67	127.592	Target 2
9	A9	116	93.5744	7576.04	161.325	Target 2
9	A9	117	93.8664	7472.51	156.306	Target 2
9	A9	118	94.1583	6975.37	123.488	Target 2
9	A9	119	94.4503	7820.25	81.8857	Target 2
9	A9	120	94.7422	7183.34	48.0898	Target 2
10	A10	1	60.0009	381086	9252.27	Target 2
10	A10	2	60.2928	379325	9270.56	Target 2
10	A10	3	60.5848	377230	9294.75	Target 2
10	A10	4	60.8767	373931	9316.13	Target 2
10	A10	5	61.1687	370568	9329.33	Target 2
10	A10	6	61.4606	369107	9330.84	Target 2
10	A10	7	61.7526	365552	9316.05	Target 2
10	A10	8	62.0445	363034	9279.73	Target 2
10	A10	9	62.3365	359684	9220.29	Target 2
10	A10	10	62.6284	355746	9144.46	Target 2
10	A10	11	62.9203	353509	9067.71	Target 2
10	A10	12	63.2123	350795	8989.88	Target 2
10	A10	13	63.5042	347759	8948.05	Target 2
10	A10	14	63.7962	345744	8965.04	Target 2
10	A10	15	64.0881	341828	9029.17	Target 2
10	A10	16	64.3801	340391	9087.72	Target 2
10	A10	17	64.672	337040	9137.58	Target 2
10	A10	18	64.9639	333096	9168.27	Target 2
10	A10	19	65.2559	330589	9172.52	Target 2
10	A10	20	65.5478	328458	9151.26	Target 2
10	A10	21	65.8398	323659	9112.13	Target 2
10	A10	22	66.1317	321849	9066.34	Target 2
10	A10	23	66.4237	319269	9016.32	Target 2
10	A10	24	66.7156	315728	8973.73	Target 2
10	A10	25	67.0076	312828	8961.61	Target 2
10	A10	26	67.2995	310786	8978.86	Target 2
10	A10	27	67.5914	307612	9016.2	Target 2
10	A10	28	67.8834	304571	9053.21	Target 2
10	A10	29	68.1753	301905	9078.04	Target 2
10	A10	30	68.4673	297754	9095.51	Target 2
10	A10	31	68.7592	295739	9103.23	Target 2
10	A10	32	69.0512	293987	9099.13	Target 2
10	A10	33	69.3431	289618	9082.27	Target 2
10	A10	34	69.635	286224	9056.87	Target 2
10	A10	35	69.927	283850	9031.75	Target 2
10	A10	36	70.2189	280883	9028.95	Target 2
10	A10	37	70.5109	279209	9061.55	Target 2
10	A10	38	70.8028	276407	9113.4	Target 2
10	A10	39	71.0948	272738	9166.88	Target 2
10	A10	40	71.3867	268888	9195.95	Target 2
10	A10	41	71.6787	266000	9187.92	Target 2
10	A10	42	71.9706	262780	9153.83	Target 2
10	A10	43	72.2625	260921	9126.09	Target 2
10	A10	44	72.5545	257511	9144.88	Target 2
10	A10	45	72.8464	255954	9242.34	Target 2
10	A10	46	73.1384	252650	9431.88	Target 2
10	A10	47	73.4303	248134	9704.44	Target 2
10	A10	48	73.7223	245532	10028.7	Target 2
10	A10	49	74.0142	242792	10352.5	Target 2
10	A10	50	74.3062	238444	10608.5	Target 2
10	A10	51	74.5981	231710	10728.9	Target 2
10	A10	52	74.89	228108	10667.5	Target 2
10	A10	53	75.182	223982	10420.7	Target 2
10	A10	54	75.4739	222160	10032.3	Target 2
10	A10	55	75.7659	220203	9578.39	Target 2
10	A10	56	76.0578	217202	9138.87	Target 2
10	A10	57	76.3498	213830	8614.73	Target 2
10	A10	58	76.6417	212879	8195.86	Target 2
10	A10	59	76.9336	210440	7937.87	Target 2
10	A10	60	77.2256	208235	7804.85	Target 2
10	A10	61	77.5175	204728	7745.49	Target 2
10	A10	62	77.8095	202888	7711.77	Target 2
10	A10	63	78.1014	198967	7674.71	Target 2
10	A10	64	78.3934	198156	7630.87	Target 2
10	A10	65	78.6853	196180	7594.56	Target 2
10	A10	66	78.9773	193437	7580.59	Target 2
10	A10	67	79.2692	190009	7589.53	Target 2
10	A10	68	79.5611	188798	7605.67	Target 2
10	A10	69	79.8531	185505	7609.41	Target 2
10	A10	70	80.145	181832	7594.46	Target 2
10	A10	71	80.437	181580	7576.51	Target 2
10	A10	72	80.7289	179527	7588.1	Target 2
10	A10	73	81.0209	175891	7662.33	Target 2
10	A10	74	81.3128	173965	7817.99	Target 2
10	A10	75	81.6048	171607	8056.55	Target 2
10	A10	76	81.8967	168362	8376.81	Target 2
10	A10	77	82.1886	164908	8804.73	Target 2
10	A10	78	82.4806	162836	9286.57	Target 2
10	A10	79	82.7725	159899	9930.7	Target 2
10	A10	80	83.0645	156823	11035.7	Target 2
10	A10	81	83.3564	153324	12892.8	Target 2
10	A10	82	83.6484	148739	15822.5	Target 2
10	A10	83	83.9403	144624	20053.4	Target 2
10	A10	84	84.2322	135584	25543.3	Target 2
10	A10	85	84.5242	116821	31807.4	Target 2
10	A10	86	84.8161	80875.5	37871.8	Target 2
10	A10	87	85.1081	27020.8	42456.1	Target 2
10	A10	88	85.4	-6261.63	44376.5	Target 2
10	A10	89	85.692	-12562.7	43009.8	Target 2
10	A10	90	85.9839	-14338.7	38572.3	Target 2
10	A10	91	86.2758	-14970	32047.4	Target 2
10	A10	92	86.5678	-16725.2	24796.6	Target 2
10	A10	93	86.8597	-15976.6	18068.3	Target 2
10	A10	94	87.1517	-16633.8	12652	Target 2
10	A10	95	87.4436	-16006.1	8649.4	Target 2
10	A10	96	87.7356	-16525.8	4731.01	Target 2
10	A10	97	88.0275	-17337.9	2478.45	Target 2
10	A10	98	88.3195	-16938	1300.79	Target 2
10	A10	99	88.6114	-17175.3	731.241	Target 2
10	A10	100	88.9034	-17684.9	464.044	Target 2
10	A10	101	89.1953	-17827.7	330.509	Target 2
10	A10	102	89.4872	-16857.9	256.008	Target 2
10	A10	103	89.7792	-17845.5	218.189	Target 2
10	A10	104	90.0711	-17200.7	213.501	Target 2
10	A10	105	90.3631	-19315.5	235.476	Target 2
10	A10	106	90.655	-18097.4	267.308	Target 2
10	A10	107	90.947	-18458.8	287.489	Target 2
10	A10	108	91.2389	-18495.1	281.309	Target 2
10	A10	109	91.5308	-18733.4	248.377	Target 2
10	A10	110	91.8228	-19010.4	200.613	Target 2
10	A10	111	92.1147	-18272.6	153.082	Target 2
10	A10	112	92.4067	-19247.4	114.662	Target 2
10	A10	113	92.6986	-19371.6	84.1396	Target 2
10	A10	114	92.9906	-19124	52.6201	Target 2
10	A10	115	93.2825	-18997.8	9.62207	Target 2
10	A10	116	93.5744	-19326	-50.9043	Target 2
10	A10	117	93.8664	-19402	-127.56	Target 2
10	A10	118	94.1583	-19024.2	-212.589	Target 2
10	A10	119	94.4503	-18964.5	-295.941	Target 2
10	A10	120	94.7422	-18593	-369.793	Target 2
11	A11	1	60.0009	332705	7557.68	Target 2
11	A11	2	60.2928	330559	7596.95	Target 2
11	A11	3	60.5848	328854	7637.52	Target 2
11	A11	4	60.8767	327081	7666.3	Target 2
11	A11	5	61.1687	325151	7675.74	Target 2
11	A11	6	61.4606	321113	7667.04	Target 2
11	A11	7	61.7526	319743	7647.9	Target 2
11	A11	8	62.0445	317759	7627.08	Target 2
11	A11	9	62.3365	315539	7610.4	Target 2
11	A11	10	62.6284	312406	7599.52	Target 2
11	A11	11	62.9203	310265	7593.48	Target 2
11	A11	12	63.2123	308148	7589.93	Target 2
11	A11	13	63.5042	305262	7585.75	Target 2
11	A11	14	63.7962	303677	7577.92	Target 2
11	A11	15	64.0881	301039	7565.63	Target 2
11	A11	16	64.3801	298342	7552.45	Target 2
11	A11	17	64.672	294773	7545.32	Target 2
11	A11	18	64.9639	295245	7550.84	Target 2
11	A11	19	65.2559	291329	7570.76	Target 2
11	A11	20	65.5478	288777	7600.18	Target 2
11	A11	21	65.8398	287183	7629.38	Target 2
11	A11	22	66.1317	283723	7647.95	Target 2
11	A11	23	66.4237	282334	7648.83	Target 2
11	A11	24	66.7156	279268	7631.02	Target 2
11	A11	25	67.0076	275742	7599.79	Target 2
11	A11	26	67.2995	275131	7564.43	Target 2
11	A11	27	67.5914	272220	7534.09	Target 2
11	A11	28	67.8834	269143	7514.01	Target 2
11	A11	29	68.1753	267917	7504.19	Target 2
11	A11	30	68.4673	265338	7500.86	Target 2
11	A11	31	68.7592	262140	7499.97	Target 2
11	A11	32	69.0512	260493	7500.13	Target 2
11	A11	33	69.3431	257787	7502.97	Target 2
11	A11	34	69.635	256332	7511.18	Target 2
11	A11	35	69.927	252583	7524.72	Target 2
11	A11	36	70.2189	251481	7538.54	Target 2
11	A11	37	70.5109	248667	7543.21	Target 2
11	A11	38	70.8028	246814	7529.51	Target 2
11	A11	39	71.0948	242564	7494.85	Target 2
11	A11	40	71.3867	241166	7414.94	Target 2
11	A11	41	71.6787	238944	7331.29	Target 2
11	A11	42	71.9706	238308	7272.25	Target 2
11	A11	43	72.2625	234278	7248.36	Target 2
11	A11	44	72.5545	232094	7255.83	Target 2
11	A11	45	72.8464	230308	7284.96	Target 2
11	A11	46	73.1384	227636	7329.09	Target 2
11	A11	47	73.4303	225784	7385.54	Target 2
11	A11	48	73.7223	223213	7449.88	Target 2
11	A11	49	74.0142	220809	7501.05	Target 2
11	A11	50	74.3062	217520	7523.26	Target 2
11	A11	51	74.5981	215984	7522.72	Target 2
11	A11	52	74.89	213961	7493.51	Target 2
11	A11	53	75.182	210272	7397.76	Target 2
11	A11	54	75.4739	208415	7263.69	Target 2
11	A11	55	75.7659	208064	7116.45	Target 2
11	A11	56	76.0578	204108	6977.89	Target 2
11	A11	57	76.3498	202320	6863.92	Target 2
11	A11	58	76.6417	201409	6781.02	Target 2
11	A11	59	76.9336	198127	6726.69	Target 2
11	A11	60	77.2256	196782	6692.77	Target 2
11	A11	61	77.5175	193997	6669.83	Target 2
11	A11	62	77.8095	192530	6650.98	Target 2
11	A11	63	78.1014	190272	6633.7	Target 2
11	A11	64	78.3934	187948	6619.64	Target 2
11	A11	65	78.6853	185948	6612.52	Target 2
11	A11	66	78.9773	184829	6615.79	Target 2
11	A11	67	79.2692	181491	6632.43	Target 2
11	A11	68	79.5611	179217	6666.48	Target 2
11	A11	69	79.8531	178444	6724.8	Target 2
11	A11	70	80.145	175226	6815	Target 2
11	A11	71	80.437	174333	6940.54	Target 2
11	A11	72	80.7289	171045	7095.75	Target 2
11	A11	73	81.0209	168614	7266.99	Target 2
11	A11	74	81.3128	165758	7440.76	Target 2
11	A11	75	81.6048	164818	7560.49	Target 2
11	A11	76	81.8967	162234	7671.52	Target 2
11	A11	77	82.1886	158283	7827.17	Target 2
11	A11	78	82.4806	156347	8095.5	Target 2
11	A11	79	82.7725	154402	8599.38	Target 2
11	A11	80	83.0645	152214	9533.64	Target 2
11	A11	81	83.3564	149321	11161.2	Target 2
11	A11	82	83.6484	145127	13765.5	Target 2
11	A11	83	83.9403	140834	17542.1	Target 2
11	A11	84	84.2322	132708	22441.3	Target 2
11	A11	85	84.5242	118327	28019.8	Target 2
11	A11	86	84.8161	85292.6	33403.5	Target 2
11	A11	87	85.1081	37245.3	37450.5	Target 2
11	A11	88	85.4	9179.5	39111.2	Target 2
11	A11	89	85.692	3897.25	37840.2	Target 2
11	A11	90	85.9839	2963.52	33844	Target 2
11	A11	91	86.2758	2311.56	28011.2	Target 2
11	A11	92	86.5678	1296.93	21559.7	Target 2
11	A11	93	86.8597	957.394	15596.3	Target 2
11	A11	94	87.1517	1169.24	10810.9	Target 2
11	A11	95	87.4436	1507.72	7352.94	Target 2
11	A11	96	87.7356	1735.09	3564.01	Target 2
11	A11	97	88.0275	1000.84	1399.9	Target 2
11	A11	98	88.3195	1332.92	299.947	Target 2
11	A11	99	88.6114	1332.48	-181.444	Target 2
11	A11	100	88.9034	210.395	-349.859	Target 2
11	A11	101	89.1953	13.9612	-393.272	Target 2
11	A11	102	89.4872	415.892	-410.953	Target 2
11	A11	103	89.7792	1285.97	-437.562	Target 2
11	A11	104	90.0711	830.918	-467.044	Target 2
11	A11	105	90.3631	-349.869	-479.328	Target 2
11	A11	106	90.655	-319.198	-463.332	Target 2
11	A11	107	90.947	-297.038	-426.32	Target 2
11	A11	108	91.2389	568.691	-387.638	Target 2
11	A11	109	91.5308	-432.763	-366.012	Target 2
11	A11	110	91.8228	-1476.32	-371.473	Target 2
11	A11	111	92.1147	-1335.83	-404.246	Target 2
11	A11	112	92.4067	607.872	-455.554	Target 2
11	A11	113	92.6986	-547.593	-507.98	Target 2
11	A11	114	92.9906	-916.772	-539.771	Target 2
11	A11	115	93.2825	-833.008	-536.22	Target 2
11	A11	116	93.5744	-2051.82	-501.492	Target 2
11	A11	117	93.8664	-2110.76	-459.041	Target 2
11	A11	118	94.1583	-1162.79	-437.081	Target 2
11	A11	119	94.4503	-449.758	-449.729	Target 2
11	A11	120	94.7422	-998.401	-489.09	Target 2
12	A12	1	60.0009	262277	6361.32	Target 2
12	A12	2	60.2928	261479	6427.2	Target 2
12	A12	3	60.5848	258060	6484.44	Target 2
12	A12	4	60.8767	256303	6534.7	Target 2
12	A12	5	61.1687	255881	6586.94	Target 2
12	A12	6	61.4606	253802	6629.63	Target 2
12	A12	7	61.7526	252419	6647.89	Target 2
12	A12	8	62.0445	248494	6632.59	Target 2
12	A12	9	62.3365	246462	6588.23	Target 2
12	A12	10	62.6284	244368	6533.12	Target 2
12	A12	11	62.9203	243107	6491.16	Target 2
12	A12	12	63.2123	240408	6480.96	Target 2
12	A12	13	63.5042	239875	6508.52	Target 2
12	A12	14	63.7962	236372	6566.69	Target 2
12	A12	15	64.0881	235277	6639.62	Target 2
12	A12	16	64.3801	232924	6709.17	Target 2
12	A12	17	64.672	230780	6760.83	Target 2
12	A12	18	64.9639	228430	6787.69	Target 2
12	A12	19	65.2559	225427	6790.73	Target 2
12	A12	20	65.5478	223909	6775.8	Target 2
12	A12	21	65.8398	221655	6749.13	Target 2
12	A12	22	66.1317	219815	6714.43	Target 2
12	A12	23	66.4237	217287	6673.72	Target 2
12	A12	24	66.7156	214587	6630.19	Target 2
12	A12	25	67.0076	212517	6590.17	Target 2
12	A12	26	67.2995	211780	6561.71	Target 2
12	A12	27	67.5914	208718	6550.96	Target 2
12	A12	28	67.8834	206406	6558.43	Target 2
12	A12	29	68.1753	205109	6577.33	Target 2
12	A12	30	68.4673	203308	6594.53	Target 2
12	A12	31	68.7592	199893	6594.57	Target 2
12	A12	32	69.0512	198718	6565.89	Target 2
12	A12	33	69.3431	195759	6507.57	Target 2
12	A12	34	69.635	193988	6411.68	Target 2
12	A12	35	69.927	191609	6286.56	Target 2
12	A12	36	70.2189	190383	6214.93	Target 2
12	A12	37	70.5109	189092	6217.06	Target 2
12	A12	38	70.8028	187874	6279.77	Target 2
12	A12	39	71.0948	183753	6363.87	Target 2
12	A12	40	71.3867	182769	6427.3	Target 2
12	A12	41	71.6787	179124	6449.55	Target 2
12	A12	42	71.9706	178819	6441.79	Target 2
12	A12	43	72.2625	176794	6438.05	Target 2
12	A12	44	72.5545	173611	6466.41	Target 2
12	A12	45	72.8464	172463	6515.71	Target 2
12	A12	46	73.1384	172667	6586.75	Target 2
12	A12	47	73.4303	166316	6658.53	Target 2
12	A12	48	73.7223	166062	6707.02	Target 2
12	A12	49	74.0142	162798	6715.99	Target 2
12	A12	50	74.3062	161085	6682.85	Target 2
12	A12	51	74.5981	159167	6616.62	Target 2
12	A12	52	74.89	157289	6531.31	Target 2
12	A12	53	75.182	154374	6424.17	Target 2
12	A12	54	75.4739	153813	6259.54	Target 2
12	A12	55	75.7659	151606	6106.84	Target 2
12	A12	56	76.0578	148886	5975.12	Target 2
12	A12	57	76.3498	147950	5875.81	Target 2
12	A12	58	76.6417	146017	5819.49	Target 2
12	A12	59	76.9336	145381	5809.02	Target 2
12	A12	60	77.2256	142875	5834.56	Target 2
12	A12	61	77.5175	139617	5876.67	Target 2
12	A12	62	77.8095	138516	5915.84	Target 2
12	A12	63	78.1014	137433	5941.45	Target 2
12	A12	64	78.3934	135425	5953.4	Target 2
12	A12	65	78.6853	132963	5956.24	Target 2
12	A12	66	78.9773	131151	5953.44	Target 2
12	A12	67	79.2692	128783	5946.19	Target 2
12	A12	68	79.5611	128453	5935.95	Target 2
12	A12	69	79.8531	125765	5926.55	Target 2
12	A12	70	80.145	123259	5924.31	Target 2
12	A12	71	80.437	121797	5937.91	Target 2
12	A12	72	80.7289	120927	5978.72	Target 2
12	A12	73	81.0209	117811	6059.1	Target 2
12	A12	74	81.3128	116652	6187.69	Target 2
12	A12	75	81.6048	115068	6365.31	Target 2
12	A12	76	81.8967	112246	6530.57	Target 2
12	A12	77	82.1886	109290	6688.96	Target 2
12	A12	78	82.4806	106863	6920.42	Target 2
12	A12	79	82.7725	106917	7315.05	Target 2
12	A12	80	83.0645	103420	8029.88	Target 2
12	A12	81	83.3564	101422	9284.76	Target 2
12	A12	82	83.6484	97716.2	11323.8	Target 2
12	A12	83	83.9403	95160.4	14329.5	Target 2
12	A12	84	84.2322	88022	18294.2	Target 2
12	A12	85	84.5242	75388.4	22891.8	Target 2
12	A12	86	84.8161	49698.6	27431.5	Target 2
12	A12	87	85.1081	7169.17	30973.5	Target 2
12	A12	88	85.4	-21996.8	32614.7	Target 2
12	A12	89	85.692	-26298.4	31837.3	Target 2
12	A12	90	85.9839	-27885.6	28739.5	Target 2
12	A12	91	86.2758	-27659.7	24010.3	Target 2
12	A12	92	86.5678	-30225.5	18657.1	Target 2
12	A12	93	86.8597	-27628.5	13636.6	Target 2
12	A12	94	87.1517	-28286.8	9576.97	Target 2
12	A12	95	87.4436	-29053.2	6693.88	Target 2
12	A12	96	87.7356	-29357	3584.92	Target 2
12	A12	97	88.0275	-29611.2	1717.63	Target 2
12	A12	98	88.3195	-29837.9	745.889	Target 2
12	A12	99	88.6114	-30112	246.431	Target 2
12	A12	100	88.9034	-28845.3	-43.3115	Target 2
12	A12	101	89.1953	-29814.2	-248.621	Target 2
12	A12	102	89.4872	-30121.6	-407.314	Target 2
12	A12	103	89.7792	-28400.2	-516.813	Target 2
12	A12	104	90.0711	-29548.7	-565.416	Target 2
12	A12	105	90.3631	-29963.1	-547.68	Target 2
12	A12	106	90.655	-29048.4	-470.056	Target 2
12	A12	107	90.947	-29827	-352.099	Target 2
12	A12	108	91.2389	-30082.5	-224.457	Target 2
12	A12	109	91.5308	-31904.3	-122.072	Target 2
12	A12	110	91.8228	-29798.8	-72.4678	Target 2
12	A12	111	92.1147	-30133.1	-83.7095	Target 2
12	A12	112	92.4067	-30433.8	-140.273	Target 2
12	A12	113	92.6986	-30527.5	-212.246	Target 2
12	A12	114	92.9906	-30815.2	-273.864	Target 2
12	A12	115	93.2825	-30857.1	-318.811	Target 2
12	A12	116	93.5744	-31569.8	-360.87	Target 2
12	A12	117	93.8664	-31181.4	-419.749	Target 2
12	A12	118	94.1583	-29263.4	-503.573	Target 2
12	A12	119	94.4503	-29525.5	-601.518	Target 2
12	A12	120	94.7422	-31030.6	-691.178	Target 2
13	B1	1	60.0009	404927	9757.8	Target 3
13	B1	2	60.2928	401884	9755.3	Target 3
13	B1	3	60.5848	400006	9739.41	Target 3
13	B1	4	60.8767	396171	9709.36	Target 3
13	B1	5	61.1687	394182	9679.61	Target 3
13	B1	6	61.4606	390088	9668.72	Target 3
13	B1	7	61.7526	387787	9681.91	Target 3
13	B1	8	62.0445	387076	9701.82	Target 3
13	B1	9	62.3365	382962	9696.64	Target 3
13	B1	10	62.6284	378833	9641.8	Target 3
13	B1	11	62.9203	374059	9538.16	Target 3
13	B1	12	63.2123	372996	9413.81	Target 3
13	B1	13	63.5042	369508	9307.32	Target 3
13	B1	14	63.7962	367159	9246.34	Target 3
13	B1	15	64.0881	364633	9235.05	Target 3
13	B1	16	64.3801	361490	9256.85	Target 3
13	B1	17	64.672	358912	9287	Target 3
13	B1	18	64.9639	355712	9306.97	Target 3
13	B1	19	65.2559	351317	9310.75	Target 3
13	B1	20	65.5478	350296	9302.89	Target 3
13	B1	21	65.8398	346744	9292	Target 3
13	B1	22	66.1317	343910	9285.31	Target 3
13	B1	23	66.4237	340573	9287.67	Target 3
13	B1	24	66.7156	337726	9301.36	Target 3
13	B1	25	67.0076	334893	9324.9	Target 3
13	B1	26	67.2995	332384	9349.31	Target 3
13	B1	27	67.5914	329400	9357.94	Target 3
13	B1	28	67.8834	325848	9331.65	Target 3
13	B1	29	68.1753	322869	9258.93	Target 3
13	B1	30	68.4673	319513	9144.92	Target 3
13	B1	31	68.7592	316318	9011.63	Target 3
13	B1	32	69.0512	314679	8889.54	Target 3
13	B1	33	69.3431	312326	8776.67	Target 3
13	B1	34	69.635	309047	8730.07	Target 3
13	B1	35	69.927	306536	8752.52	Target 3
13	B1	36	70.2189	304063	8828.06	Target 3
13	B1	37	70.5109	300650	8918.35	Target 3
13	B1	38	70.8028	299080	8998.21	Target 3
13	B1	39	71.0948	295321	9063.04	Target 3
13	B1	40	71.3867	291967	9096.49	Target 3
13	B1	41	71.6787	289772	9087.43	Target 3
13	B1	42	71.9706	286159	9033.12	Target 3
13	B1	43	72.2625	283734	8939.56	Target 3
13	B1	44	72.5545	281222	8796.99	Target 3
13	B1	45	72.8464	278038	8618.08	Target 3
13	B1	46	73.1384	275738	8452.84	Target 3
13	B1	47	73.4303	273312	8325.09	Target 3
13	B1	48	73.7223	270456	8251.2	Target 3
13	B1	49	74.0142	268237	8234.39	Target 3
13	B1	50	74.3062	266713	8263.21	Target 3
13	B1	51	74.5981	261683	8316.54	Target 3
13	B1	52	74.89	260483	8374.32	Target 3
13	B1	53	75.182	257702	8426.5	Target 3
13	B1	54	75.4739	254340	8473.88	Target 3
13	B1	55	75.7659	254285	8520.25	Target 3
13	B1	56	76.0578	249806	8564.91	Target 3
13	B1	57	76.3498	246567	8605.14	Target 3
13	B1	58	76.6417	244060	8649.99	Target 3
13	B1	59	76.9336	242343	8735.54	Target 3
13	B1	60	77.2256	239256	8914.92	Target 3
13	B1	61	77.5175	237602	9196.02	Target 3
13	B1	62	77.8095	234909	9688.88	Target 3
13	B1	63	78.1014	231031	10470.5	Target 3
13	B1	64	78.3934	227526	11643.2	Target 3
13	B1	65	78.6853	223470	13366	Target 3
13	B1	66	78.9773	218545	15879	Target 3
13	B1	67	79.2692	212517	19488.9	Target 3
13	B1	68	79.5611	206006	24484.1	Target 3
13	B1	69	79.8531	197914	30968.3	Target 3
13	B1	70	80.145	183689	38653.5	Target 3
13	B1	71	80.437	160826	46713.5	Target 3
13	B1	72	80.7289	120260	53824.7	Target 3
13	B1	73	81.0209	71003.6	58467.4	Target 3
13	B1	74	81.3128	33743.8	59417.7	Target 3
13	B1	75	81.6048	14923.8	56222.4	Target 3
13	B1	76	81.8967	9672.7	49412.3	Target 3
13	B1	77	82.1886	7503.66	40328.2	Target 3
13	B1	78	82.4806	7480.22	30644.5	Target 3
13	B1	79	82.7725	7599.3	21829.3	Target 3
13	B1	80	83.0645	7152.51	14781.7	Target 3
13	B1	81	83.3564	6812.97	9756.31	Target 3
13	B1	82	83.6484	4812.56	5605.73	Target 3
13	B1	83	83.9403	6668.7	2960.22	Target 3
13	B1	84	84.2322	5361.7	1502.73	Target 3
13	B1	85	84.5242	6041.55	724.487	Target 3
13	B1	86	84.8161	5384.86	303.656	Target 3
13	B1	87	85.1081	5800.08	67.2021	Target 3
13	B1	88	85.4	5558.76	-67.166	Target 3
13	B1	89	85.692	6100.35	-137.368	Target 3
13	B1	90	85.9839	5287	-163.317	Target 3
13	B1	91	86.2758	5319.17	-157.461	Target 3
13	B1	92	86.5678	5636.8	-127.182	Target 3
13	B1	93	86.8597	5387.76	-75.999	Target 3
13	B1	94	87.1517	5813.19	-7.44824	Target 3
13	B1	95	87.4436	4366.58	69.4121	Target 3
13	B1	96	87.7356	4378.25	138.068	Target 3
13	B1	97	88.0275	4375.17	180.312	Target 3
13	B1	98	88.3195	4632.8	187.359	Target 3
13	B1	99	88.6114	4413.65	167.654	Target 3
13	B1	100	88.9034	4427.48	143.58	Target 3
13	B1	101	89.1953	4563.94	137.425	Target 3
13	B1	102	89.4872	3604.67	155.732	Target 3
13	B1	103	89.7792	3081.27	183.211	Target 3
13	B1	104	90.0711	3259.69	190.826	Target 3
13	B1	105	90.3631	3433.2	152.879	Target 3
13	B1	106	90.655	3557.78	61.7461	Target 3
13	B1	107	90.947	3657.91	-68.957	Target 3
13	B1	108	91.2389	3545.24	-213.187	Target 3
13	B1	109	91.5308	3082.14	-345.236	Target 3
13	B1	110	91.8228	4409.91	-447.08	Target 3
13	B1	111	92.1147	3689.03	-507.648	Target 3
13	B1	112	92.4067	4444.71	-519.207	Target 3
13	B1	113	92.6986	4044.55	-477.766	Target 3
13	B1	114	92.9906	3372.39	-388.679	Target 3
13	B1	115	93.2825	3645.37	-271.582	Target 3
13	B1	116	93.5744	2648.49	-157.583	Target 3
13	B1	117	93.8664	3258.4	-77.584	Target 3
13	B1	118	94.1583	3707.71	-48.2852	Target 3
13	B1	119	94.4503	2980.48	-65.1553	Target 3
13	B1	120	94.7422	3792.07	-106.972	Target 3
14	B2	1	60.0009	440172	10636.8	Target 3
14	B2	2	60.2928	436599	10649.1	Target 3
14	B2	3	60.5848	432177	10625.8	Target 3
14	B2	4	60.8767	429557	10562.9	Target 3
14	B2	5	61.1687	426362	10474.7	Target 3
14	B2	6	61.4606	424579	10383.5	Target 3
14	B2	7	61.7526	421139	10307.2	Target 3
14	B2	8	62.0445	417314	10253	Target 3
14	B2	9	62.3365	414862	10219.7	Target 3
14	B2	10	62.6284	411143	10203.7	Target 3
14	B2	11	62.9203	408305	10202.8	Target 3
14	B2	12	63.2123	404929	10215.2	Target 3
14	B2	13	63.5042	401422	10235.8	Target 3
14	B2	14	63.7962	399112	10255.2	Target 3
14	B2	15	64.0881	395806	10263.3	Target 3
14	B2	16	64.3801	392383	10256.5	Target 3
14	B2	17	64.672	387511	10241.4	Target 3
14	B2	18	64.9639	385822	10231.5	Target 3
14	B2	19	65.2559	382998	10238.3	Target 3
14	B2	20	65.5478	379797	10263	Target 3
14	B2	21	65.8398	375653	10295.7	Target 3
14	B2	22	66.1317	372752	10320.5	Target 3
14	B2	23	66.4237	370073	10324.8	Target 3
14	B2	24	66.7156	365832	10304.9	Target 3
14	B2	25	67.0076	361841	10265.9	Target 3
14	B2	26	67.2995	359944	10216.9	Target 3
14	B2	27	67.5914	357142	10164.7	Target 3
14	B2	28	67.8834	352753	10111.1	Target 3
14	B2	29	68.1753	349899	10055.3	Target 3
14	B2	30	68.4673	346181	9997.55	Target 3
14	B2	31	68.7592	344832	9942.52	Target 3
14	B2	32	69.0512	339811	9898.7	Target 3
14	B2	33	69.3431	337891	9867.3	Target 3
14	B2	34	69.635	334408	9873.89	Target 3
14	B2	35	69.927	331719	9912.79	Target 3
14	B2	36	70.2189	329123	9963.88	Target 3
14	B2	37	70.5109	325447	10016.9	Target 3
14	B2	38	70.8028	321868	10053.1	Target 3
14	B2	39	71.0948	318779	10059.2	Target 3
14	B2	40	71.3867	315456	10031.8	Target 3
14	B2	41	71.6787	312829	9976.31	Target 3
14	B2	42	71.9706	309148	9902.55	Target 3
14	B2	43	72.2625	306626	9787.83	Target 3
14	B2	44	72.5545	303061	9665.29	Target 3
14	B2	45	72.8464	300729	9542.74	Target 3
14	B2	46	73.1384	297913	9426.27	Target 3
14	B2	47	73.4303	293314	9326.92	Target 3
14	B2	48	73.7223	292256	9259.98	Target 3
14	B2	49	74.0142	288391	9237.76	Target 3
14	B2	50	74.3062	286976	9259.76	Target 3
14	B2	51	74.5981	282335	9308.56	Target 3
14	B2	52	74.89	280838	9356.48	Target 3
14	B2	53	75.182	275130	9381.05	Target 3
14	B2	54	75.4739	275138	9378.1	Target 3
14	B2	55	75.7659	270912	9363.21	Target 3
14	B2	56	76.0578	269390	9361.21	Target 3
14	B2	57	76.3498	265942	9394.54	Target 3
14	B2	58	76.6417	262009	9481.5	Target 3
14	B2	59	76.9336	260284	9646.37	Target 3
14	B2	60	77.2256	256713	9922.55	Target 3
14	B2	61	77.5175	254675	10263.4	Target 3
14	B2	62	77.8095	250841	10814.4	Target 3
14	B2	63	78.1014	247666	11668.5	Target 3
14	B2	64	78.3934	245144	12949.8	Target 3
14	B2	65	78.6853	238499	14834.4	Target 3
14	B2	66	78.9773	232954	17572.7	Target 3
14	B2	67	79.2692	226871	21480.3	Target 3
14	B2	68	79.5611	219730	26860.5	Target 3
14	B2	69	79.8531	208901	33833.8	Target 3
14	B2	70	80.145	195851	42113.4	Target 3
14	B2	71	80.437	170532	50833	Target 3
14	B2	72	80.7289	126665	58573.1	Target 3
14	B2	73	81.0209	71665.3	63673.5	Target 3
14	B2	74	81.3128	29906.5	64770.4	Target 3
14	B2	75	81.6048	8791.01	61329.2	Target 3
14	B2	76	81.8967	2614.65	53898.8	Target 3
14	B2	77	82.1886	2085.75	43936.9	Target 3
14	B2	78	82.4806	1870.91	33289.4	Target 3
14	B2	79	82.7725	1669.95	23589	Target 3
14	B2	80	83.0645	1366.75	15845.3	Target 3
14	B2	81	83.3564	1196.02	10353.4	Target 3
14	B2	82	83.6484	1046.25	5606.28	Target 3
14	B2	83	83.9403	605.698	2788.55	Target 3
14	B2	84	84.2322	1093.4	1338.65	Target 3
14	B2	85	84.5242	-417.074	662.763	Target 3
14	B2	86	84.8161	158.014	372.682	Target 3
14	B2	87	85.1081	387.267	249.916	Target 3
14	B2	88	85.4	-88.2055	184.349	Target 3
14	B2	89	85.692	-998.412	122.756	Target 3
14	B2	90	85.9839	-857.738	40.041	Target 3
14	B2	91	86.2758	-873.64	-69.5146	Target 3
14	B2	92	86.5678	-576.789	-192.195	Target 3
14	B2	93	86.8597	37.2577	-298.171	Target 3
14	B2	94	87.1517	-289.005	-353.757	Target 3
14	B2	95	87.4436	-436.487	-338.238	Target 3
14	B2	96	87.7356	-1790.76	-255.164	Target 3
14	B2	97	88.0275	-237.176	-131.223	Target 3
14	B2	98	88.3195	-1868.41	-4.63574	Target 3
14	B2	99	88.6114	-1293.75	88.6787	Target 3
14	B2	100	88.9034	-2156.49	124.346	Target 3
14	B2	101	89.1953	-2910.2	93.4072	Target 3
14	B2	102	89.4872	-1175.52	3.22559	Target 3
14	B2	103	89.7792	-1505.61	-124.279	Target 3
14	B2	104	90.0711	-2516.1	-259.071	Target 3
14	B2	105	90.3631	-1218.94	-373.662	Target 3
14	B2	106	90.655	-2266.07	-452.395	Target 3
14	B2	107	90.947	-1779.67	-493.119	Target 3
14	B2	108	91.2389	-1592.62	-500.943	Target 3
14	B2	109	91.5308	-1698.11	-480.495	Target 3
14	B2	110	91.8228	-1668.65	-433.649	Target 3
14	B2	111	92.1147	-2089.18	-363.777	Target 3
14	B2	112	92.4067	-2773.46	-281.192	Target 3
14	B2	113	92.6986	-2112.4	-203.564	Target 3
14	B2	114	92.9906	-2446.34	-149.702	Target 3
14	B2	115	93.2825	-2904.29	-130.731	Target 3
14	B2	116	93.5744	-2638.71	-144.521	Target 3
14	B2	117	93.8664	-2146.78	-176.505	Target 3
14	B2	118	94.1583	-2478.36	-205.99	Target 3
14	B2	119	94.4503	-2564.92	-214.569	Target 3
14	B2	120	94.7422	-2398.85	-192.946	Target 3
15	B3	1	60.0009	427340	10331.4	Target 3
15	B3	2	60.2928	423707	10336.6	Target 3
15	B3	3	60.5848	420839	10332.5	Target 3
15	B3	4	60.8767	419239	10302.8	Target 3
15	B3	5	61.1687	415529	10244.4	Target 3
15	B3	6	61.4606	411697	10169.5	Target 3
15	B3	7	61.7526	408905	10097.6	Target 3
15	B3	8	62.0445	406075	10044.4	Target 3
15	B3	9	62.3365	404221	10012.1	Target 3
15	B3	10	62.6284	398789	9988.37	Target 3
15	B3	11	62.9203	396804	9954.51	Target 3
15	B3	12	63.2123	395432	9896.88	Target 3
15	B3	13	63.5042	388046	9816.49	Target 3
15	B3	14	63.7962	386989	9728.87	Target 3
15	B3	15	64.0881	384363	9655.94	Target 3
15	B3	16	64.3801	381870	9613.84	Target 3
15	B3	17	64.672	377953	9605.57	Target 3
15	B3	18	64.9639	375115	9620.95	Target 3
15	B3	19	65.2559	372733	9642.44	Target 3
15	B3	20	65.5478	369146	9653.03	Target 3
15	B3	21	65.8398	365996	9643.98	Target 3
15	B3	22	66.1317	362817	9618.62	Target 3
15	B3	23	66.4237	359697	9591.62	Target 3
15	B3	24	66.7156	356229	9582.16	Target 3
15	B3	25	67.0076	354867	9603.64	Target 3
15	B3	26	67.2995	350548	9655.27	Target 3
15	B3	27	67.5914	348562	9720.33	Target 3
15	B3	28	67.8834	344667	9772.69	Target 3
15	B3	29	68.1753	341058	9787.87	Target 3
15	B3	30	68.4673	338649	9753.72	Target 3
15	B3	31	68.7592	335158	9675.94	Target 3
15	B3	32	69.0512	330666	9576.51	Target 3
15	B3	33	69.3431	330203	9485.04	Target 3
15	B3	34	69.635	325938	9427.07	Target 3
15	B3	35	69.927	323579	9413.47	Target 3
15	B3	36	70.2189	321216	9437.21	Target 3
15	B3	37	70.5109	317275	9477.29	Target 3
15	B3	38	70.8028	314533	9509.4	Target 3
15	B3	39	71.0948	311230	9515.84	Target 3
15	B3	40	71.3867	308246	9492.17	Target 3
15	B3	41	71.6787	305443	9447.2	Target 3
15	B3	42	71.9706	301852	9397.59	Target 3
15	B3	43	72.2625	299933	9355.91	Target 3
15	B3	44	72.5545	296991	9331.97	Target 3
15	B3	45	72.8464	293336	9328.19	Target 3
15	B3	46	73.1384	292130	9325.83	Target 3
15	B3	47	73.4303	285929	9302.5	Target 3
15	B3	48	73.7223	285629	9244.26	Target 3
15	B3	49	74.0142	280825	9152.4	Target 3
15	B3	50	74.3062	279165	9042.97	Target 3
15	B3	51	74.5981	275987	8940.02	Target 3
15	B3	52	74.89	273356	8867	Target 3
15	B3	53	75.182	271140	8841.02	Target 3
15	B3	54	75.4739	267940	8869.86	Target 3
15	B3	55	75.7659	265570	8951.71	Target 3
15	B3	56	76.0578	262516	9077.03	Target 3
15	B3	57	76.3498	260406	9233.51	Target 3
15	B3	58	76.6417	256537	9406.68	Target 3
15	B3	59	76.9336	252977	9583.81	Target 3
15	B3	60	77.2256	251300	9842.46	Target 3
15	B3	61	77.5175	247577	10263.7	Target 3
15	B3	62	77.8095	245242	10964.6	Target 3
15	B3	63	78.1014	241777	12097.3	Target 3
15	B3	64	78.3934	238893	13854.8	Target 3
15	B3	65	78.6853	232203	16485.3	Target 3
15	B3	66	78.9773	225869	20294.7	Target 3
15	B3	67	79.2692	219032	25598.8	Target 3
15	B3	68	79.5611	210564	32586.1	Target 3
15	B3	69	79.8531	198003	41098.5	Target 3
15	B3	70	80.145	178474	50415.8	Target 3
15	B3	71	80.437	142153	59195.6	Target 3
15	B3	72	80.7289	89149.7	65700.8	Target 3
15	B3	73	81.0209	41001.2	68311.6	Target 3
15	B3	74	81.3128	14638.2	66129.7	Target 3
15	B3	75	81.6048	4727.36	59375.5	Target 3
15	B3	76	81.8967	1904.33	49351.7	Target 3
15	B3	77	82.1886	4116.15	37979.9	Target 3
15	B3	78	82.4806	2704.09	27145.6	Target 3
15	B3	79	82.7725	2699.27	18165.9	Target 3
15	B3	80	83.0645	2760.09	11580.8	Target 3
15	B3	81	83.3564	1886.86	6616.33	Target 3
15	B3	82	83.6484	1994.32	3285.9	Target 3
15	B3	83	83.9403	1566.75	1501.1	Target 3
15	B3	84	84.2322	1726.41	617.839	Target 3
15	B3	85	84.5242	1623.16	202.737	Target 3
15	B3	86	84.8161	1226.78	11.8613	Target 3
15	B3	87	85.1081	1406.05	-71.5371	Target 3
15	B3	88	85.4	1186.95	-97.1719	Target 3
15	B3	89	85.692	1324.89	-89.1357	Target 3
15	B3	90	85.9839	815.86	-67.5703	Target 3
15	B3	91	86.2758	-156.132	-54.0762	Target 3
15	B3	92	86.5678	94.5907	-65.3418	Target 3
15	B3	93	86.8597	84.8573	-102.486	Target 3
15	B3	94	87.1517	1495.6	-146.819	Target 3
15	B3	95	87.4436	402.59	-169.726	Target 3
15	B3	96	87.7356	47.1966	-153.248	Target 3
15	B3	97	88.0275	-602.17	-106.443	Target 3
15	B3	98	88.3195	-1740.55	-62.6543	Target 3
15	B3	99	88.6114	-176.197	-57.2061	Target 3
15	B3	100	88.9034	-173.352	-102.216	Target 3
15	B3	101	89.1953	178.048	-178.601	Target 3
15	B3	102	89.4872	-1257.53	-250.919	Target 3
15	B3	103	89.7792	-1306.44	-291.475	Target 3
15	B3	104	90.0711	-158.627	-294.363	Target 3
15	B3	105	90.3631	-1291.32	-271.927	Target 3
15	B3	106	90.655	-555.076	-241.956	Target 3
15	B3	107	90.947	-2042.56	-218.215	Target 3
15	B3	108	91.2389	-1555.39	-208.61	Target 3
15	B3	109	91.5308	-1148.06	-216.702	Target 3
15	B3	110	91.8228	-1186.27	-242.446	Target 3
15	B3	111	92.1147	-1658.39	-283.099	Target 3
15	B3	112	92.4067	-1949.55	-336.109	Target 3
15	B3	113	92.6986	-2286.22	-401.619	Target 3
15	B3	114	92.9906	-942.565	-480.427	Target 3
15	B3	115	93.2825	-987.787	-568.28	Target 3
15	B3	116	93.5744	-1466.35	-653.292	Target 3
15	B3	117	93.8664	-1056.72	-721.559	Target 3
15	B3	118	94.1583	-1790.24	-767.314	Target 3
15	B3	119	94.4503	-402.935	-798.181	Target 3
15	B3	120	94.7422	-2330.45	-830.144	Target 3
16	B4	1	60.0009	425063	8938.35	Target 3
16	B4	2	60.2928	422872	9028.83	Target 3
16	B4	3	60.5848	420914	9106.49	Target 3
16	B4	4	60.8767	418121	9163.51	Target 3
16	B4	5	61.1687	415568	9198.23	Target 3
16	B4	6	61.4606	411437	9220.55	Target 3
16	B4	7	61.7526	410200	9244.79	Target 3
16	B4	8	62.0445	407157	9281.93	Target 3
16	B4	9	62.3365	405029	9335.7	Target 3
16	B4	10	62.6284	399648	9403.34	Target 3
16	B4	11	62.9203	398657	9476.74	Target 3
16	B4	12	63.2123	395173	9543.08	Target 3
16	B4	13	63.5042	392716	9585.8	Target 3
16	B4	14	63.7962	388285	9589.19	Target 3
16	B4	15	64.0881	385756	9546.44	Target 3
16	B4	16	64.3801	382557	9465.67	Target 3
16	B4	17	64.672	379831	9370.74	Target 3
16	B4	18	64.9639	375343	9293.44	Target 3
16	B4	19	65.2559	374107	9260.22	Target 3
16	B4	20	65.5478	371375	9279.9	Target 3
16	B4	21	65.8398	368444	9339.27	Target 3
16	B4	22	66.1317	365274	9409.56	Target 3
16	B4	23	66.4237	361694	9459.31	Target 3
16	B4	24	66.7156	358307	9466.35	Target 3
16	B4	25	67.0076	355863	9423.72	Target 3
16	B4	26	67.2995	352894	9339.23	Target 3
16	B4	27	67.5914	348961	9232.05	Target 3
16	B4	28	67.8834	346030	9126.9	Target 3
16	B4	29	68.1753	344422	9047.85	Target 3
16	B4	30	68.4673	340932	9010.94	Target 3
16	B4	31	68.7592	338509	9019.11	Target 3
16	B4	32	69.0512	335519	9061.91	Target 3
16	B4	33	69.3431	332524	9120.09	Target 3
16	B4	34	69.635	330158	9173.2	Target 3
16	B4	35	69.927	325944	9205.83	Target 3
16	B4	36	70.2189	323668	9210.29	Target 3
16	B4	37	70.5109	320845	9186	Target 3
16	B4	38	70.8028	317968	9137.14	Target 3
16	B4	39	71.0948	314235	9071.16	Target 3
16	B4	40	71.3867	312208	8999.35	Target 3
16	B4	41	71.6787	309186	8929.88	Target 3
16	B4	42	71.9706	305861	8884.91	Target 3
16	B4	43	72.2625	304149	8890.26	Target 3
16	B4	44	72.5545	301008	8945.98	Target 3
16	B4	45	72.8464	299027	9016.24	Target 3
16	B4	46	73.1384	295012	9075.82	Target 3
16	B4	47	73.4303	291456	9098.56	Target 3
16	B4	48	73.7223	288139	9067.61	Target 3
16	B4	49	74.0142	286675	8986.31	Target 3
16	B4	50	74.3062	282660	8849.8	Target 3
16	B4	51	74.5981	280780	8701.33	Target 3
16	B4	52	74.89	278133	8575.62	Target 3
16	B4	53	75.182	275006	8490.88	Target 3
16	B4	54	75.4739	272845	8455.48	Target 3
16	B4	55	75.7659	270522	8469.5	Target 3
16	B4	56	76.0578	268155	8526.84	Target 3
16	B4	57	76.3498	264884	8619.16	Target 3
16	B4	58	76.6417	261546	8743.31	Target 3
16	B4	59	76.9336	259780	8912.41	Target 3
16	B4	60	77.2256	256246	9121.57	Target 3
16	B4	61	77.5175	254921	9442.05	Target 3
16	B4	62	77.8095	251040	9980.17	Target 3
16	B4	63	78.1014	247174	10892	Target 3
16	B4	64	78.3934	244432	12423.7	Target 3
16	B4	65	78.6853	240801	14928.8	Target 3
16	B4	66	78.9773	236658	18836.7	Target 3
16	B4	67	79.2692	231042	24538.2	Target 3
16	B4	68	79.5611	222635	32181	Target 3
16	B4	69	79.8531	208551	41423.7	Target 3
16	B4	70	80.145	185090	51265.7	Target 3
16	B4	71	80.437	141796	60101.3	Target 3
16	B4	72	80.7289	86369.6	66078.1	Target 3
16	B4	73	81.0209	42537.7	67687.5	Target 3
16	B4	74	81.3128	22836.3	64339.2	Target 3
16	B4	75	81.6048	16135.5	56627.2	Target 3
16	B4	76	81.8967	14133.2	46130.7	Target 3
16	B4	77	82.1886	14433.4	34846.4	Target 3
16	B4	78	82.4806	13789.1	24537.8	Target 3
16	B4	79	82.7725	14211.7	16295.4	Target 3
16	B4	80	83.0645	13090	10440.6	Target 3
16	B4	81	83.3564	12980.3	6094.16	Target 3
16	B4	82	83.6484	12282.9	3361.17	Target 3
16	B4	83	83.9403	12068.4	1927.39	Target 3
16	B4	84	84.2322	11817.9	1229.51	Target 3
16	B4	85	84.5242	12487.6	904.894	Target 3
16	B4	86	84.8161	11246.1	753.159	Target 3
16	B4	87	85.1081	10937.6	674.971	Target 3
16	B4	88	85.4	10940	624.111	Target 3
16	B4	89	85.692	10361.1	581.642	Target 3
16	B4	90	85.9839	10897.9	544.226	Target 3
16	B4	91	86.2758	10230.7	515.988	Target 3
16	B4	92	86.5678	9928.53	499.666	Target 3
16	B4	93	86.8597	9394.25	489.829	Target 3
16	B4	94	87.1517	10184.8	472.444	Target 3
16	B4	95	87.4436	8475.4	431.269	Target 3
16	B4	96	87.7356	9088.08	357.23	Target 3
16	B4	97	88.0275	9639.11	255.08	Target 3
16	B4	98	88.3195	9170.11	143.192	Target 3
16	B4	99	88.6114	9884.11	45.8877	Target 3
16	B4	100	88.9034	8683.71	-17.833	Target 3
16	B4	101	89.1953	9062.27	-42.5898	Target 3
16	B4	102	89.4872	9450.58	-36.8486	Target 3
16	B4	103	89.7792	8373.78	-15.4961	Target 3
16	B4	104	90.0711	9020.4	9.62695	Target 3
16	B4	105	90.3631	9077.72	34.9072	Target 3
16	B4	106	90.655	8623.68	63.2744	Target 3
16	B4	107	90.947	8731.17	97.9873	Target 3
16	B4	108	91.2389	7995.12	136.915	Target 3
16	B4	109	91.5308	7952.17	171.684	Target 3
16	B4	110	91.8228	8232.82	192.47	Target 3
16	B4	111	92.1147	7970.7	194.706	Target 3
16	B4	112	92.4067	8411.53	181.954	Target 3
16	B4	113	92.6986	7242.62	162.188	Target 3
16	B4	114	92.9906	7835.28	140.613	Target 3
16	B4	115	93.2825	6961.54	115.669	Target 3
16	B4	116	93.5744	7809.31	82.085	Target 3
16	B4	117	93.8664	7845.48	38.0928	Target 3
16	B4	118	94.1583	8580.46	-10.2744	Target 3
16	B4	119	94.4503	6705.61	-52.0215	Target 3
16	B4	120	94.7422	7460.63	-78.6748	Target 3
17	B5	1	60.0009	448488	10217	Target 3
17	B5	2	60.2928	444770	10248.2	Target 3
17	B5	3	60.5848	443645	10264.9	Target 3
17	B5	4	60.8767	440085	10259.4	Target 3
17	B5	5	61.1687	436749	10241.2	Target 3
17	B5	6	61.4606	433395	10230.8	Target 3
17	B5	7	61.7526	431072	10244.5	Target 3
17	B5	8	62.0445	428780	10281.3	Target 3
17	B5	9	62.3365	425809	10323.6	Target 3
17	B5	10	62.6284	421378	10348.4	Target 3
17	B5	11	62.9203	417387	10341.5	Target 3
17	B5	12	63.2123	415116	10302.6	Target 3
17	B5	13	63.5042	412259	10241.4	Target 3
17	B5	14	63.7962	408778	10172.2	Target 3
17	B5	15	64.0881	404586	10110.5	Target 3
17	B5	16	64.3801	402525	10071	Target 3
17	B5	17	64.672	399539	10063.9	Target 3
17	B5	18	64.9639	395835	10089.4	Target 3
17	B5	19	65.2559	393455	10133	Target 3
17	B5	20	65.5478	390273	10169.2	Target 3
17	B5	21	65.8398	386948	10171.8	Target 3
17	B5	22	66.1317	382777	10128.6	Target 3
17	B5	23	66.4237	379908	10049.6	Target 3
17	B5	24	66.7156	376370	9962.85	Target 3
17	B5	25	67.0076	373438	9899.48	Target 3
17	B5	26	67.2995	372315	9874.91	Target 3
17	B5	27	67.5914	367502	9880.77	Target 3
17	B5	28	67.8834	364947	9890.54	Target 3
17	B5	29	68.1753	361598	9876.8	Target 3
17	B5	30	68.4673	358250	9828.19	Target 3
17	B5	31	68.7592	354396	9755.75	Target 3
17	B5	32	69.0512	352496	9686.14	Target 3
17	B5	33	69.3431	349478	9645.59	Target 3
[truncated: 9,567 more rows]

## Sheet: Melt Curve Result
Block Type	96-Well 0.2-mL Block
Calibration Background is expired	No
Calibration Background performed on	04-12-2018
Calibration Pure Dye ABY is expired	No
Calibration Pure Dye ABY performed on	04-12-2018
Calibration Pure Dye CY5 is expired	No
Calibration Pure Dye CY5 performed on	04-12-2018
Calibration Pure Dye FAM is expired	No
Calibration Pure Dye FAM performed on	04-12-2018
Calibration Pure Dye JUN is expired	No
Calibration Pure Dye JUN performed on	04-12-2018
Calibration Pure Dye MUSTANG PURPLE is expired	No
Calibration Pure Dye MUSTANG PURPLE performed on	04-12-2018
Calibration Pure Dye NED is expired	No
Calibration Pure Dye NED performed on	04-12-2018
Calibration Pure Dye ROX is expired	No
Calibration Pure Dye ROX performed on	04-12-2018
Calibration Pure Dye SYBR is expired	No
Calibration Pure Dye SYBR performed on	04-12-2018
Calibration Pure Dye TAMRA is expired	No
Calibration Pure Dye TAMRA performed on	04-12-2018
Calibration Pure Dye VIC is expired	No
Calibration Pure Dye VIC performed on	04-12-2018
Calibration ROI is expired	No
Calibration ROI performed on	04-12-2018
Calibration Uniformity is expired	No
Calibration Uniformity performed on	04-12-2018
Chemistry	SYBR_GREEN
Date Created	2021-07-10 01:26:38 AM PDT
Experiment Barcode
Experiment Comment
Experiment File Name	D:\datas\zhu lab\wdy\2021-07-10_000241.eds
Experiment Name	2021-07-10_000241
Experiment Run End Time	Not Started
Experiment Type	Standard Curve
Instrument Name
Instrument Serial Number
Instrument Type	QuantStudio™ 5 System
Passive Reference	ROX
Post-read Stage/Step
Pre-read Stage/Step
Quantification Cycle Method	Ct
Signal Smoothing On	true
Stage where Melt Analysis is performed	Stage3
Stage/ Cycle where Ct Analysis is performed	Stage2, Step2
User Name
Well	Well Position	Sample	Target Name	Tm	Melt Peak Height
1	A1	wt	Target 1	84.9621	39548.5
2	A2	wt	Target 1	85.1081	44203.8
3	A3	wt	Target 1	84.6702	44286.4
4	A4	ko	Target 1	84.8161	46646.3
5	A5	ko	Target 1	85.1081	51151.1
6	A6	ko	Target 1	85.1081	49812.2
7	A7	wt	Target 2	85.692	55896
8	A8	wt	Target 2	85.692	41104.1
9	A9	wt	Target 2	85.4	44710.4
10	A10	ko	Target 2	85.4	44376.5
11	A11	ko	Target 2	85.4	39111.2
12	A12	ko	Target 2	85.4	32614.7
13	B1	wt	Target 3	81.1668	59454.8
14	B2	wt	Target 3	81.1668	64780.2
15	B3	wt	Target 3	81.0209	68311.6
16	B4	ko	Target 3	81.0209	67687.5
17	B5	ko	Target 3	81.1668	78304.6
18	B6	ko	Target 3	81.3128	69630.2
19	B7	wt	Target 4	60.0009	4149.08
20	B8	wt	Target 4	60.0009	3569.39
21	B9	wt	Target 4	60.0009	3619.7
22	B10	ko	Target 4	78.3934	74475
23	B11	ko	Target 4	78.5393	61384.3
24	B12	ko	Target 4	78.5393	61008.6
25	C1	wt	Target 5	74.0142	57110.8
26	C2	wt	Target 5	74.3062	75250.8
27	C3	wt	Target 5	74.1602	89288.5
28	C4	ko	Target 5	73.8682	55253.2
28	C4	ko	Target 5	81.1668	15592.5
29	C5	ko	Target 5	74.3062	88366.8
30	C6	ko	Target 5	74.3062	90438.7
31	C7	wt	Target 6	85.4	47086.2
32	C8	wt	Target 6	85.4	41512.7
33	C9	wt	Target 6	85.1081	40097.4
34	C10	ko	Target 6	85.2541	44821.6
35	C11	ko	Target 6	85.1081	42652.1
36	C12	ko	Target 6	85.1081	35500.1
37	D1	wt	Target 7	80.8749	56080
38	D2	wt	Target 7	80.8749	60712.1
39	D3	wt	Target 7	80.7289	53201.1
40	D4	ko	Target 7	80.7289	61927.2
41	D5	ko	Target 7	81.0209	66834.6
42	D6	ko	Target 7	81.0209	54099.1
43	D7	wt	Target 8	80.291	60469.4
44	D8	wt	Target 8	80.291	59319.7
45	D9	wt	Target 8	80.291	58987.7
46	D10	ko	Target 8	80.291	74691.2
47	D11	ko	Target 8	79.9991	46267.3
48	D12	ko	Target 8	80.145	51838.2
49	E1	wt	Target 9	82.4806	49111
50	E2	wt	Target 9	82.3346	49154.2
51	E3	wt	Target 9	82.3346	50081.2
52	E4	ko	Target 9	82.3346	52796
53	E5	ko	Target 9	82.6266	47964.8
54	E6	ko	Target 9	82.6266	51321.3
55	E7	wt	Target 10	82.4806	33688.9
55	E7	wt	Target 10	85.9839	29607.4
55	E7	wt	Target 10	73.1384	16967.2
56	E8	wt	Target 10	82.4806	28662.9
56	E8	wt	Target 10	73.2843	19357.4
56	E8	wt	Target 10	85.9839	21906
57	E9	wt	Target 10	82.4806	31614.4
57	E9	wt	Target 10	72.9924	16427.6
57	E9	wt	Target 10	85.9839	22234.3
58	E10	ko	Target 10	82.1886	34612.6
58	E10	ko	Target 10	86.1299	29676.8
58	E10	ko	Target 10	72.9924	12091.8
59	E11	ko	Target 10	81.8967	25818.4
59	E11	ko	Target 10	73.1384	21726.6
60	E12	ko	Target 10	82.0427	31038.2
60	E12	ko	Target 10	85.9839	22727.1
60	E12	ko	Target 10	72.9924	9646.45
61	F1	wt	Target 11	84.0863	21289.4
61	F1	wt	Target 11	78.2474	12023.6
62	F2	wt	Target 11	84.0863	35457.5
63	F3	wt	Target 11	83.9403	30348.3
63	F3	wt	Target 11	74.89	15681.4
64	F4	ko	Target 11	83.9403	32636.2
65	F5	ko	Target 11	84.0863	37761
66	F6	ko	Target 11	84.0863	23337.1
66	F6	ko	Target 11	78.2474	13636.7
67	F7	wt	Target 13	84.3782	51606.3
68	F8	wt	Target 13	84.5242	45365.9
69	F9	wt	Target 13	84.3782	45476.2
70	F10	ko	Target 13	84.5242	50662.1
71	F11	ko	Target 13	84.2322	44376.6
72	F12	ko	Target 13	84.2322	38245.7
73	G1	wt	Target 14	79.7071	53405
74	G2	wt	Target 14	79.7071	48861.4
75	G3	wt	Target 14	79.7071	44545.9
76	G4	ko	Target 14	79.5611	63805.3
77	G5	ko	Target 14	79.7071	52762.7
78	G6	ko	Target 14	79.8531	49577.5
79	G7	wt	Target 15	60.0009	2061.79
80	G8	wt	Target 15	79.8531	57950.1
80	G8	wt	Target 15	82.3346	45618.5
81	G9	wt	Target 15	80.291	6944
81	G9	wt	Target 15	68.4673	3357.57
82	G10	ko	Target 15	79.9991	36444.6
83	G11	ko	Target 15	79.8531	36476
84	G12	ko	Target 15	79.8531	34832.8
85	H1	wt	Target 16	87.7356	27353.5
85	H1	wt	Target 16	84.8161	22616
85	H1	wt	Target 16	74.3062	11296.2
86	H2	wt	Target 16	85.2541	23321.6
87	H3	wt	Target 16	77.5175	33133.3
87	H3	wt	Target 16	86.1299	25798.2
88	H4	ko	Target 16	87.8815	31326.3
88	H4	ko	Target 16	83.7943	15526.4
89	H5	ko	Target 16	88.0275	32723.7
89	H5	ko	Target 16	84.2322	18722
90	H6	ko	Target 16	88.0275	35662.6
90	H6	ko	Target 16	84.0863	32272
91	H7	wt	18s	82.7725	58430
92	H8	wt	18s	82.7725	56127.8
93	H9	wt	18s	82.9185	53480.6
94	H10	ko	18s	83.0645	46924.2
95	H11	ko	18s	82.7725	40138.6
96	H12	ko	18s	82.7725	34169.6
