# Supplementary material for: ASB3 ablation has no detectable effects on spermatogenesis and fertility in male mice
Source: PeerJ journal article supplement (doi:10.7717/peerj.19738), 2025-07-31
Supplement: RawDataFig1.zip [file asb3-各周龄.xls]

## Sheet: Results (2)
Well	Well Position	Omit	Sample Name	Target Name	Task	Reporter	Quencher	CT	Ct Mean	Ct SD	Quantity	Quantity Mean	Quantity SD	Y-Intercept	R(superscript 2)	Slope	Efficiency	Automatic Ct Threshold	Ct Threshold	Automatic Baseline	Baseline Start	Baseline End	Amp Status	Comments	Cq Conf	MTP	Tm1	Tm2	Tm3	Tm4
1	A1	FALSE	1w	18s	UNKNOWN	SYBR	None	6.67972	6.60059	0.0690104								TRUE	0.745195	TRUE	3	3	Amp		0.96019	N	84.2365
2	A2	FALSE	1w	18s	UNKNOWN	SYBR	None	6.56921	6.60059	0.0690104								TRUE	0.745195	TRUE	3	3	Amp		0.911115	N	84.0905
3	A3	FALSE	1w	18s	UNKNOWN	SYBR	None	6.55285	6.60059	0.0690104								TRUE	0.745195	TRUE	3	3	Amp		0.926981	N	84.115
4	A4	FALSE	1w	asb3	UNKNOWN	SYBR	None	23.1127	23.1279	0.0208354								TRUE	0.904229	TRUE	3	16	Amp		0.92366	N	82.3613
5	A5	FALSE	1w	asb3	UNKNOWN	SYBR	None	23.1516	23.1279	0.0208354								TRUE	0.904229	TRUE	3	16	Amp		0.927207	N	82.316
6	A6	FALSE	1w	asb3	UNKNOWN	SYBR	None	23.1194	23.1279	0.0208354								TRUE	0.904229	TRUE	3	16	Amp		0.924901	N	82.4618
13	B1	FALSE	2w	18s	UNKNOWN	SYBR	None	6.67212	6.65875	0.0317671								TRUE	0.745195	TRUE	3	3	Amp		0.934124	N	84.0905
14	B2	FALSE	2w	18s	UNKNOWN	SYBR	None	6.62249	6.65875	0.0317671								TRUE	0.745195	TRUE	3	3	Amp		0.9065	N	84.0905
15	B3	FALSE	2w	18s	UNKNOWN	SYBR	None	6.68165	6.65875	0.0317671								TRUE	0.745195	TRUE	3	3	Amp		0.872574	N	83.9688
16	B4	FALSE	2w	asb3	UNKNOWN	SYBR	None	21.9945	22.0156	0.0283834								TRUE	0.904229	TRUE	3	15	Amp		0.9273	N	82.3613
17	B5	FALSE	2w	asb3	UNKNOWN	SYBR	None	22.0478	22.0156	0.0283834								TRUE	0.904229	TRUE	3	15	Amp		0.915312	N	82.316
18	B6	FALSE	2w	asb3	UNKNOWN	SYBR	None	22.0043	22.0156	0.0283834								TRUE	0.904229	TRUE	3	14	Amp		0.92226	N	82.4618
25	C1	FALSE	3w	18s	UNKNOWN	SYBR	None	6.40451	6.23535	0.146769								TRUE	0.745195	TRUE	3	3	Amp		0.913617	N	84.0905
26	C2	FALSE	3w	18s	UNKNOWN	SYBR	None	6.1597	6.23535	0.146769								TRUE	0.745195	TRUE	3	3	Amp		0.894531	N	83.9445
27	C3	FALSE	3w	18s	UNKNOWN	SYBR	None	6.14183	6.23535	0.146769								TRUE	0.745195	TRUE	3	3	Amp		0.902788	N	83.9688
28	C4	FALSE	3w	asb3	UNKNOWN	SYBR	None	21.1034	21.1414	0.0569952								TRUE	0.904229	TRUE	3	14	Amp		0.889835	N	82.3613
29	C5	FALSE	3w	asb3	UNKNOWN	SYBR	None	21.1138	21.1414	0.0569952								TRUE	0.904229	TRUE	3	14	Amp		0.893841	N	82.316
30	C6	FALSE	3w	asb3	UNKNOWN	SYBR	None	21.2069	21.1414	0.0569952								TRUE	0.904229	TRUE	3	14	Amp		0.895402	N	82.4618
37	D1	FALSE	4w	18s	UNKNOWN	SYBR	None	6.37268	6.35296	0.017078								TRUE	0.745195	TRUE	3	3	Amp		0.914131	N	83.9445
38	D2	FALSE	4w	18s	UNKNOWN	SYBR	None	6.34344	6.35296	0.017078								TRUE	0.745195	TRUE	3	3	Amp		0.906053	N	83.7985
39	D3	FALSE	4w	18s	UNKNOWN	SYBR	None	6.34276	6.35296	0.017078								TRUE	0.745195	TRUE	3	3	Amp		0.903176	N	83.9688
40	D4	FALSE	4w	asb3	UNKNOWN	SYBR	None	21.0906	21.0776	0.0134833								TRUE	0.904229	TRUE	3	14	Amp		0.888819	N	82.3613
41	D5	FALSE	4w	asb3	UNKNOWN	SYBR	None	21.0785	21.0776	0.0134833								TRUE	0.904229	TRUE	3	14	Amp		0.893053	N	82.316
42	D6	FALSE	4w	asb3	UNKNOWN	SYBR	None	21.0637	21.0776	0.0134833								TRUE	0.904229	TRUE	3	14	Amp		0.893318	N	82.4618
49	E1	FALSE	5w	18s	UNKNOWN	SYBR	None	6.43407	6.36958	0.0685456								TRUE	0.745195	TRUE	3	3	Amp		0.871207	N	83.9445
50	E2	FALSE	5w	18s	UNKNOWN	SYBR	None	6.37707	6.36958	0.0685456								TRUE	0.745195	TRUE	3	3	Amp		0.892331	N	83.7985
51	E3	FALSE	5w	18s	UNKNOWN	SYBR	None	6.2976	6.36958	0.0685456								TRUE	0.745195	TRUE	3	3	Amp		0.875197	N	84.115
52	E4	FALSE	5w	asb3	UNKNOWN	SYBR	None	21.4662	21.4623	0.0134772								TRUE	0.904229	TRUE	3	14	Amp		0.902257	N	82.3613
53	E5	FALSE	5w	asb3	UNKNOWN	SYBR	None	21.4735	21.4623	0.0134772								TRUE	0.904229	TRUE	3	15	Amp		0.905378	N	82.316
54	E6	FALSE	5w	asb3	UNKNOWN	SYBR	None	21.4473	21.4623	0.0134772								TRUE	0.904229	TRUE	3	14	Amp		0.903381	N	82.316
61	F1	FALSE	6w	18s	UNKNOWN	SYBR	None	6.09509	5.99173	0.0972701								TRUE	0.745195	TRUE	3	3	Amp		0.885196	N	83.7985
62	F2	FALSE	6w	18s	UNKNOWN	SYBR	None	5.97812	5.99173	0.0972701								TRUE	0.745195	TRUE	3	3	Amp		0.908793	N	83.6525
63	F3	FALSE	6w	18s	UNKNOWN	SYBR	None	5.90198	5.99173	0.0972701								TRUE	0.745195	TRUE	3	3	Amp		0.867875	N	83.9688
64	F4	FALSE	6w	asb3	UNKNOWN	SYBR	None	21.6947	21.7242	0.025658								TRUE	0.904229	TRUE	3	14	Amp		0.889807	N	82.3613
65	F5	FALSE	6w	asb3	UNKNOWN	SYBR	None	21.7406	21.7242	0.025658								TRUE	0.904229	TRUE	3	15	Amp		0.893604	Y	82.1701	74.8775
66	F6	FALSE	6w	asb3	UNKNOWN	SYBR	None	21.7375	21.7242	0.025658								TRUE	0.904229	TRUE	3	15	Amp		0.893101	Y	82.1701	75.1693
73	G1	FALSE	7w	18s	UNKNOWN	SYBR	None	6.42819	6.35164	0.078248								TRUE	0.745195	TRUE	3	3	Amp		0.871003	N	83.7985
74	G2	FALSE	7w	18s	UNKNOWN	SYBR	None	6.35493	6.35164	0.078248								TRUE	0.745195	TRUE	3	3	Amp		0.884276	N	83.7985
75	G3	FALSE	7w	18s	UNKNOWN	SYBR	None	6.2718	6.35164	0.078248								TRUE	0.745195	TRUE	3	3	Amp		0.884606	N	83.9688
76	G4	FALSE	7w	asb3	UNKNOWN	SYBR	None	21.4242	21.4242	0.0492163								TRUE	0.904229	TRUE	3	15	Amp		0.886864	N	82.3613
77	G5	FALSE	7w	asb3	UNKNOWN	SYBR	None	21.3749	21.4242	0.0492163								TRUE	0.904229	TRUE	3	14	Amp		0.895976	N	82.1701
78	G6	FALSE	7w	asb3	UNKNOWN	SYBR	None	21.4733	21.4242	0.0492163								TRUE	0.904229	TRUE	3	14	Amp		0.896989	N	82.1701
85	H1	FALSE	8w	18s	UNKNOWN	SYBR	None	5.93916	5.77494	0.151261								TRUE	0.745195	TRUE	3	3	Amp		0.90276	N	83.7985
86	H2	FALSE	8w	18s	UNKNOWN	SYBR	None	5.74433	5.77494	0.151261								TRUE	0.745195	TRUE	3	3	Amp		0.876582	N	83.9445
87	H3	FALSE	8w	18s	UNKNOWN	SYBR	None	5.64132	5.77494	0.151261								TRUE	0.745195	TRUE	3	3	Amp		0.921632	Y	84.115	68.7698
88	H4	FALSE	8w	asb3	UNKNOWN	SYBR	None	21.5705	21.6436	0.0834459								TRUE	0.904229	TRUE	3	15	Amp		0.861452	N	82.5074
89	H5	FALSE	8w	asb3	UNKNOWN	SYBR	None	21.6258	21.6436	0.0834459								TRUE	0.904229	TRUE	3	15	Amp		0.863845	N	82.316
90	H6	FALSE	8w	asb3	UNKNOWN	SYBR	None	21.7345	21.6436	0.0834459								TRUE	0.904229	TRUE	3	15	Amp		0.869389	N	82.316
					A	目的基因
		1w	18s	6.67972	6.60059	23.1127	16.5121	1.06998e-05	106.998
		1w	18s	6.56921		23.1516	16.551	1.04146e-05	104.146
		1w	18s	6.55285		23.1194	16.5188	1.06501e-05	106.501
		2w	18s	6.67212	6.65875	21.9945	15.3358	2.41811e-05	241.811
		2w	18s	6.62249		22.0478	15.3891	2.33035e-05	233.035
		2w	18s	6.68165		22.0043	15.3456	2.40169e-05	240.169
		3w	18s	6.40451	6.23535	21.1034	14.868	3.34408e-05	334.408
		3w	18s	6.1597		21.1138	14.8785	3.31997e-05	331.997
		3w	18s	6.14183		21.2069	14.9716	3.11253e-05	311.253
		4w	18s	6.37268	6.35296	21.0906	14.7376	3.66044e-05	366.044
		4w	18s	6.34344		21.0785	14.7255	3.69125e-05	369.125
		4w	18s	6.34276		21.0637	14.7107	3.72938e-05	372.938
		5w	18s	6.43407	6.36958	21.4662	15.0966	2.85415e-05	285.415
		5w	18s	6.37707		21.4735	15.1039	2.83974e-05	283.974
		5w	18s	6.2976		21.4473	15.0778	2.89162e-05	289.162
		6w	18s	6.09509	5.99173	21.6947	15.7029	1.87474e-05	187.474
		6w	18s	5.97812		21.7406	15.7488	1.81605e-05	181.605
		6w	18s	5.90198		21.7375	15.7458	1.8199e-05	181.99
		7w	18s	6.42819	6.35164	21.4242	15.0726	2.90198e-05	290.198
		7w	18s	6.35493		21.3749	15.0232	3.00297e-05	300.297
		7w	18s	6.2718		21.4733	15.1217	2.80492e-05	280.492
		8w	18s	5.93916	5.77494	21.5705	15.7955	1.7582e-05	175.82
		8w	18s	5.74433		21.6258	15.8508	1.69211e-05	169.211
		8w	18s	5.64132		21.7345	15.9596	1.56927e-05	156.927
		1w	2w	3w	4w	5w	6w	7w	8w
		106.998	241.811	334.408	366.044	285.415	187.474	290.198	175.82
		104.146	233.035	331.997	369.125	283.974	181.605	300.297	169.211
		106.501	240.169	311.253	372.938	289.162	181.99	280.492	156.927
						1622

## Sheet: Sample Setup
Block Type	96-Well 0.2-mL Block
Calibration Background is expired	No
Calibration Background performed on	08-01-2022
Calibration Pure Dye ABY is expired	No
Calibration Pure Dye ABY performed on	08-01-2022
Calibration Pure Dye CY5 is expired	No
Calibration Pure Dye CY5 performed on	08-01-2022
Calibration Pure Dye FAM is expired	No
Calibration Pure Dye FAM performed on	08-01-2022
Calibration Pure Dye JUN is expired	No
Calibration Pure Dye JUN performed on	08-01-2022
Calibration Pure Dye MUSTANG PURPLE is expired	No
Calibration Pure Dye MUSTANG PURPLE performed on	08-01-2022
Calibration Pure Dye NED is expired	No
Calibration Pure Dye NED performed on	08-01-2022
Calibration Pure Dye ROX is expired	No
Calibration Pure Dye ROX performed on	08-01-2022
Calibration Pure Dye SYBR is expired	No
Calibration Pure Dye SYBR performed on	08-01-2022
Calibration Pure Dye TAMRA is expired	No
Calibration Pure Dye TAMRA performed on	08-01-2022
Calibration Pure Dye VIC is expired	No
Calibration Pure Dye VIC performed on	08-01-2022
Calibration ROI is expired	No
Calibration ROI performed on	08-01-2022
Calibration Uniformity is expired	No
Calibration Uniformity performed on	08-01-2022
Chemistry	SYBR_GREEN
Date Created	2023-12-01 02:27:14 AM CST
Experiment Barcode
Experiment Comment
Experiment File Name	D:\datas\huang lab\qxy\2023-12-01_004614.eds
Experiment Name	2023-12-01_004614
Experiment Run End Time	2023-11-30 23:21:19 PM CST
Experiment Type	Standard Curve
Instrument Name	272520824
Instrument Serial Number	272520824
Instrument Type	QuantStudio™ 5 System
Passive Reference	ROX
Post-read Stage/Step
Pre-read Stage/Step
Quantification Cycle Method	Ct
Signal Smoothing On	true
Stage where Melt Analysis is performed	Stage3
Stage/ Cycle where Ct Analysis is performed	Stage2, Step2
User Name
Well	Well Position	Sample Name	Sample Color	Biogroup Name	Biogroup Color	Target Name	Target Color	Task	Reporter	Quencher	Quantity	Comments
1	A1	1w	RGB(176,23,31)			18s	RGB(0,245,255)	UNKNOWN	SYBR	None
2	A2	1w	RGB(176,23,31)			18s	RGB(0,245,255)	UNKNOWN	SYBR	None
3	A3	1w	RGB(176,23,31)			18s	RGB(0,245,255)	UNKNOWN	SYBR	None
4	A4	1w	RGB(176,23,31)			asb3	RGB(238,220,130)	UNKNOWN	SYBR	None
5	A5	1w	RGB(176,23,31)			asb3	RGB(238,220,130)	UNKNOWN	SYBR	None
6	A6	1w	RGB(176,23,31)			asb3	RGB(238,220,130)	UNKNOWN	SYBR	None
7	A7
8	A8
9	A9
10	A10
11	A11
12	A12
13	B1	2w	RGB(0,0,255)			18s	RGB(0,245,255)	UNKNOWN	SYBR	None
14	B2	2w	RGB(0,0,255)			18s	RGB(0,245,255)	UNKNOWN	SYBR	None
15	B3	2w	RGB(0,0,255)			18s	RGB(0,245,255)	UNKNOWN	SYBR	None
16	B4	2w	RGB(0,0,255)			asb3	RGB(238,220,130)	UNKNOWN	SYBR	None
17	B5	2w	RGB(0,0,255)			asb3	RGB(238,220,130)	UNKNOWN	SYBR	None
18	B6	2w	RGB(0,0,255)			asb3	RGB(238,220,130)	UNKNOWN	SYBR	None
19	B7
20	B8
21	B9
22	B10
23	B11
24	B12
25	C1	3w	RGB(0,139,69)			18s	RGB(0,245,255)	UNKNOWN	SYBR	None
26	C2	3w	RGB(0,139,69)			18s	RGB(0,245,255)	UNKNOWN	SYBR	None
27	C3	3w	RGB(0,139,69)			18s	RGB(0,245,255)	UNKNOWN	SYBR	None
28	C4	3w	RGB(0,139,69)			asb3	RGB(238,220,130)	UNKNOWN	SYBR	None
29	C5	3w	RGB(0,139,69)			asb3	RGB(238,220,130)	UNKNOWN	SYBR	None
30	C6	3w	RGB(0,139,69)			asb3	RGB(238,220,130)	UNKNOWN	SYBR	None
31	C7
32	C8
33	C9
34	C10
35	C11
36	C12
37	D1	4w	RGB(255,127,0)			18s	RGB(0,245,255)	UNKNOWN	SYBR	None
38	D2	4w	RGB(255,127,0)			18s	RGB(0,245,255)	UNKNOWN	SYBR	None
39	D3	4w	RGB(255,127,0)			18s	RGB(0,245,255)	UNKNOWN	SYBR	None
40	D4	4w	RGB(255,127,0)			asb3	RGB(238,220,130)	UNKNOWN	SYBR	None
41	D5	4w	RGB(255,127,0)			asb3	RGB(238,220,130)	UNKNOWN	SYBR	None
42	D6	4w	RGB(255,127,0)			asb3	RGB(238,220,130)	UNKNOWN	SYBR	None
43	D7
44	D8
45	D9
46	D10
47	D11
48	D12
49	E1	5w	RGB(139,137,112)			18s	RGB(0,245,255)	UNKNOWN	SYBR	None
50	E2	5w	RGB(139,137,112)			18s	RGB(0,245,255)	UNKNOWN	SYBR	None
51	E3	5w	RGB(139,137,112)			18s	RGB(0,245,255)	UNKNOWN	SYBR	None
52	E4	5w	RGB(139,137,112)			asb3	RGB(238,220,130)	UNKNOWN	SYBR	None
53	E5	5w	RGB(139,137,112)			asb3	RGB(238,220,130)	UNKNOWN	SYBR	None
54	E6	5w	RGB(139,137,112)			asb3	RGB(238,220,130)	UNKNOWN	SYBR	None
55	E7
56	E8
57	E9
58	E10
59	E11
60	E12
61	F1	6w	RGB(238,121,66)			18s	RGB(0,245,255)	UNKNOWN	SYBR	None
62	F2	6w	RGB(238,121,66)			18s	RGB(0,245,255)	UNKNOWN	SYBR	None
63	F3	6w	RGB(238,121,66)			18s	RGB(0,245,255)	UNKNOWN	SYBR	None
64	F4	6w	RGB(238,121,66)			asb3	RGB(238,220,130)	UNKNOWN	SYBR	None
65	F5	6w	RGB(238,121,66)			asb3	RGB(238,220,130)	UNKNOWN	SYBR	None
66	F6	6w	RGB(238,121,66)			asb3	RGB(238,220,130)	UNKNOWN	SYBR	None
67	F7
68	F8
69	F9
70	F10
71	F11
72	F12
73	G1	7w	RGB(142,56,142)			18s	RGB(0,245,255)	UNKNOWN	SYBR	None
74	G2	7w	RGB(142,56,142)			18s	RGB(0,245,255)	UNKNOWN	SYBR	None
75	G3	7w	RGB(142,56,142)			18s	RGB(0,245,255)	UNKNOWN	SYBR	None
76	G4	7w	RGB(142,56,142)			asb3	RGB(238,220,130)	UNKNOWN	SYBR	None
77	G5	7w	RGB(142,56,142)			asb3	RGB(238,220,130)	UNKNOWN	SYBR	None
78	G6	7w	RGB(142,56,142)			asb3	RGB(238,220,130)	UNKNOWN	SYBR	None
79	G7
80	G8
81	G9
82	G10
83	G11
84	G12
85	H1	8w	RGB(198,113,113)			18s	RGB(0,245,255)	UNKNOWN	SYBR	None
86	H2	8w	RGB(198,113,113)			18s	RGB(0,245,255)	UNKNOWN	SYBR	None
87	H3	8w	RGB(198,113,113)			18s	RGB(0,245,255)	UNKNOWN	SYBR	None
88	H4	8w	RGB(198,113,113)			asb3	RGB(238,220,130)	UNKNOWN	SYBR	None
89	H5	8w	RGB(198,113,113)			asb3	RGB(238,220,130)	UNKNOWN	SYBR	None
90	H6	8w	RGB(198,113,113)			asb3	RGB(238,220,130)	UNKNOWN	SYBR	None
91	H7
92	H8
93	H9
94	H10
95	H11
96	H12

## Sheet: Amplification Data
Block Type	96-Well 0.2-mL Block
Calibration Background is expired	No
Calibration Background performed on	08-01-2022
Calibration Pure Dye ABY is expired	No
Calibration Pure Dye ABY performed on	08-01-2022
Calibration Pure Dye CY5 is expired	No
Calibration Pure Dye CY5 performed on	08-01-2022
Calibration Pure Dye FAM is expired	No
Calibration Pure Dye FAM performed on	08-01-2022
Calibration Pure Dye JUN is expired	No
Calibration Pure Dye JUN performed on	08-01-2022
Calibration Pure Dye MUSTANG PURPLE is expired	No
Calibration Pure Dye MUSTANG PURPLE performed on	08-01-2022
Calibration Pure Dye NED is expired	No
Calibration Pure Dye NED performed on	08-01-2022
Calibration Pure Dye ROX is expired	No
Calibration Pure Dye ROX performed on	08-01-2022
Calibration Pure Dye SYBR is expired	No
Calibration Pure Dye SYBR performed on	08-01-2022
Calibration Pure Dye TAMRA is expired	No
Calibration Pure Dye TAMRA performed on	08-01-2022
Calibration Pure Dye VIC is expired	No
Calibration Pure Dye VIC performed on	08-01-2022
Calibration ROI is expired	No
Calibration ROI performed on	08-01-2022
Calibration Uniformity is expired	No
Calibration Uniformity performed on	08-01-2022
Chemistry	SYBR_GREEN
Date Created	2023-12-01 02:27:14 AM CST
Experiment Barcode
Experiment Comment
Experiment File Name	D:\datas\huang lab\qxy\2023-12-01_004614.eds
Experiment Name	2023-12-01_004614
Experiment Run End Time	2023-11-30 23:21:19 PM CST
Experiment Type	Standard Curve
Instrument Name	272520824
Instrument Serial Number	272520824
Instrument Type	QuantStudio™ 5 System
Passive Reference	ROX
Post-read Stage/Step
Pre-read Stage/Step
Quantification Cycle Method	Ct
Signal Smoothing On	true
Stage where Melt Analysis is performed	Stage3
Stage/ Cycle where Ct Analysis is performed	Stage2, Step2
User Name
Well	Well Position	Cycle	Target Name	Rn	Delta Rn
1	A1	1	18s	0.593761	-0.116769
1	A1	2	18s	0.628308	-0.0822216
1	A1	3	18s	0.71053	0
1	A1	4	18s	0.813115	0.102585
1	A1	5	18s	0.979081	0.268551
1	A1	6	18s	1.23264	0.522113
1	A1	7	18s	1.57933	0.8688
1	A1	8	18s	2.04572	1.33519
1	A1	9	18s	2.65058	1.94005
1	A1	10	18s	3.3574	2.64687
1	A1	11	18s	4.06219	3.35166
1	A1	12	18s	4.72809	4.01756
1	A1	13	18s	5.30139	4.59086
1	A1	14	18s	5.77258	5.06205
1	A1	15	18s	6.14579	5.43526
1	A1	16	18s	6.4454	5.73487
1	A1	17	18s	6.69517	5.98464
1	A1	18	18s	6.90033	6.1898
1	A1	19	18s	7.0847	6.37417
1	A1	20	18s	7.2279	6.51737
1	A1	21	18s	7.33764	6.62711
1	A1	22	18s	7.43204	6.72151
1	A1	23	18s	7.51901	6.80848
1	A1	24	18s	7.58837	6.87784
1	A1	25	18s	7.62908	6.91855
1	A1	26	18s	7.67832	6.96779
1	A1	27	18s	7.70572	6.99519
1	A1	28	18s	7.75237	7.04184
1	A1	29	18s	7.78622	7.07569
1	A1	30	18s	7.80812	7.09759
1	A1	31	18s	7.82122	7.11069
1	A1	32	18s	7.85097	7.14044
1	A1	33	18s	7.85604	7.14551
1	A1	34	18s	7.87744	7.16691
1	A1	35	18s	7.9119	7.20137
1	A1	36	18s	7.92448	7.21395
1	A1	37	18s	7.92509	7.21456
1	A1	38	18s	7.94069	7.23016
1	A1	39	18s	7.93944	7.22891
1	A1	40	18s	7.9406	7.23007
2	A2	1	18s	0.589622	-0.110292
2	A2	2	18s	0.620239	-0.0796745
2	A2	3	18s	0.699914	0
2	A2	4	18s	0.803648	0.103734
2	A2	5	18s	0.979055	0.279141
2	A2	6	18s	1.24535	0.545435
2	A2	7	18s	1.62237	0.922456
2	A2	8	18s	2.12807	1.42816
2	A2	9	18s	2.78325	2.08333
2	A2	10	18s	3.55224	2.85233
2	A2	11	18s	4.3357	3.63578
2	A2	12	18s	5.05706	4.35715
2	A2	13	18s	5.69033	4.99042
2	A2	14	18s	6.22948	5.52957
2	A2	15	18s	6.6572	5.95729
2	A2	16	18s	6.98876	6.28885
2	A2	17	18s	7.27255	6.57264
2	A2	18	18s	7.49613	6.79621
2	A2	19	18s	7.68093	6.98102
2	A2	20	18s	7.85063	7.15071
2	A2	21	18s	7.98034	7.28043
2	A2	22	18s	8.07406	7.37414
2	A2	23	18s	8.15573	7.45582
2	A2	24	18s	8.23739	7.53747
2	A2	25	18s	8.31371	7.6138
2	A2	26	18s	8.37601	7.67609
2	A2	27	18s	8.43683	7.73692
2	A2	28	18s	8.47503	7.77511
2	A2	29	18s	8.50453	7.80462
2	A2	30	18s	8.54493	7.84502
2	A2	31	18s	8.59891	7.899
2	A2	32	18s	8.63026	7.93035
2	A2	33	18s	8.65131	7.9514
2	A2	34	18s	8.67067	7.97075
2	A2	35	18s	8.696	7.99609
2	A2	36	18s	8.71096	8.01105
2	A2	37	18s	8.72911	8.02919
2	A2	38	18s	8.73575	8.03584
2	A2	39	18s	8.75222	8.0523
2	A2	40	18s	8.76928	8.06936
3	A3	1	18s	0.584128	-0.117849
3	A3	2	18s	0.61915	-0.0828279
3	A3	3	18s	0.701978	0
3	A3	4	18s	0.811706	0.109728
3	A3	5	18s	0.986098	0.28412
3	A3	6	18s	1.25454	0.552565
3	A3	7	18s	1.63122	0.929239
3	A3	8	18s	2.14173	1.43975
3	A3	9	18s	2.80822	2.10624
3	A3	10	18s	3.57439	2.87242
3	A3	11	18s	4.35684	3.65487
3	A3	12	18s	5.09261	4.39063
3	A3	13	18s	5.73041	5.02844
3	A3	14	18s	6.27237	5.57039
3	A3	15	18s	6.7035	6.00152
3	A3	16	18s	7.0459	6.34393
3	A3	17	18s	7.32732	6.62535
3	A3	18	18s	7.56971	6.86774
3	A3	19	18s	7.78498	7.083
3	A3	20	18s	7.94872	7.24674
3	A3	21	18s	8.0669	7.36492
3	A3	22	18s	8.17694	7.47496
3	A3	23	18s	8.2827	7.58072
3	A3	24	18s	8.36794	7.66596
3	A3	25	18s	8.42767	7.72569
3	A3	26	18s	8.50669	7.80472
3	A3	27	18s	8.5707	7.86872
3	A3	28	18s	8.61158	7.9096
3	A3	29	18s	8.65085	7.94887
3	A3	30	18s	8.67047	7.9685
3	A3	31	18s	8.70163	7.99965
3	A3	32	18s	8.73374	8.03176
3	A3	33	18s	8.76643	8.06445
3	A3	34	18s	8.77841	8.07643
3	A3	35	18s	8.79691	8.09494
3	A3	36	18s	8.82507	8.12309
3	A3	37	18s	8.85289	8.15091
3	A3	38	18s	8.8721	8.17013
3	A3	39	18s	8.87202	8.17004
3	A3	40	18s	8.87129	8.16931
4	A4	1	asb3	0.587343	-0.0541237
4	A4	2	asb3	0.609429	-0.0411633
4	A4	3	asb3	0.644825	-0.0148925
4	A4	4	asb3	0.663358	-0.00548519
4	A4	5	asb3	0.67979	0.00182233
4	A4	6	asb3	0.692097	0.00500372
4	A4	7	asb3	0.701936	0.00571724
4	A4	8	asb3	0.713294	0.00795002
4	A4	9	asb3	0.720767	0.00629836
4	A4	10	asb3	0.729113	0.00551831
4	A4	11	asb3	0.739424	0.00670461
4	A4	12	asb3	0.740947	-0.000897257
4	A4	13	asb3	0.745686	-0.00528357
4	A4	14	asb3	0.753489	-0.00660597
4	A4	15	asb3	0.765437	-0.00378364
4	A4	16	asb3	0.776279	-0.0020665
4	A4	17	asb3	0.78988	0.00240926
4	A4	18	asb3	0.815152	0.0185563
4	A4	19	asb3	0.866089	0.0603674
4	A4	20	asb3	0.952715	0.137868
4	A4	21	asb3	1.10222	0.278245
4	A4	22	asb3	1.34763	0.514534
4	A4	23	asb3	1.69706	0.854834
4	A4	24	asb3	2.17278	1.32144
4	A4	25	asb3	2.79211	1.93164
4	A4	26	asb3	3.5384	2.6688
4	A4	27	asb3	4.34915	3.47043
4	A4	28	asb3	5.15086	4.26301
4	A4	29	asb3	5.86399	4.96702
4	A4	30	asb3	6.43732	5.53122
4	A4	31	asb3	6.92559	6.01037
4	A4	32	asb3	7.31744	6.39309
4	A4	33	asb3	7.60832	6.67484
4	A4	34	asb3	7.85594	6.91334
4	A4	35	asb3	8.06119	7.10946
4	A4	36	asb3	8.2325	7.27165
4	A4	37	asb3	8.35824	7.38826
4	A4	38	asb3	8.45406	7.47496
4	A4	39	asb3	8.54877	7.56054
4	A4	40	asb3	8.62551	7.62816
5	A5	1	asb3	0.562473	-0.0481448
5	A5	2	asb3	0.582023	-0.036983
5	A5	3	asb3	0.613426	-0.013968
5	A5	4	asb3	0.635142	-0.000640203
5	A5	5	asb3	0.643617	-0.000553498
5	A5	6	asb3	0.651984	-0.00057426
5	A5	7	asb3	0.666021	0.00507374
5	A5	8	asb3	0.675772	0.00643747
5	A5	9	asb3	0.687201	0.00947747
5	A5	10	asb3	0.691716	0.00560458
5	A5	11	asb3	0.697973	0.00347405
5	A5	12	asb3	0.701541	-0.00134638
5	A5	13	asb3	0.711295	1.98004e-05
5	A5	14	asb3	0.717481	-0.00218225
5	A5	15	asb3	0.724336	-0.00371578
5	A5	16	asb3	0.729333	-0.00710677
5	A5	17	asb3	0.745727	0.00089889
5	A5	18	asb3	0.769638	0.0164219
5	A5	19	asb3	0.817071	0.0554668
5	A5	20	asb3	0.907062	0.137069
5	A5	21	asb3	1.05542	0.277041
5	A5	22	asb3	1.2998	0.513036
5	A5	23	asb3	1.64021	0.845055
5	A5	24	asb3	2.09376	1.29022
5	A5	25	asb3	2.70129	1.88936
5	A5	26	asb3	3.44227	2.62195
5	A5	27	asb3	4.24701	3.4183
5	A5	28	asb3	5.02551	4.18841
5	A5	29	asb3	5.72252	4.87704
5	A5	30	asb3	6.29603	5.44215
5	A5	31	asb3	6.77505	5.91279
5	A5	32	asb3	7.15099	6.28034
5	A5	33	asb3	7.45791	6.57888
5	A5	34	asb3	7.69704	6.80962
5	A5	35	asb3	7.90666	7.01085
5	A5	36	asb3	8.07492	7.17072
5	A5	37	asb3	8.21188	7.29929
5	A5	38	asb3	8.3244	7.40342
5	A5	39	asb3	8.41125	7.48188
5	A5	40	asb3	8.47068	7.53292
6	A6	1	asb3	0.615146	-0.0531849
6	A6	2	asb3	0.635442	-0.0417062
6	A6	3	asb3	0.66664	-0.0193264
6	A6	4	asb3	0.688943	-0.00584172
6	A6	5	asb3	0.707233	0.00363099
6	A6	6	asb3	0.718619	0.00619946
6	A6	7	asb3	0.728864	0.00762632
6	A6	8	asb3	0.737258	0.00720293
6	A6	9	asb3	0.745927	0.00705396
6	A6	10	asb3	0.754809	0.00711784
6	A6	11	asb3	0.761772	0.00526251
6	A6	12	asb3	0.764704	-0.000623053
6	A6	13	asb3	0.773584	-0.000560902
6	A6	14	asb3	0.775822	-0.0071405
6	A6	15	asb3	0.784987	-0.00679314
6	A6	16	asb3	0.79679	-0.00380828
6	A6	17	asb3	0.814371	0.0049552
6	A6	18	asb3	0.841361	0.0231277
6	A6	19	asb3	0.894126	0.0670745
6	A6	20	asb3	0.984485	0.148615
6	A6	21	asb3	1.13141	0.286728
6	A6	22	asb3	1.37375	0.520248
6	A6	23	asb3	1.71993	0.857607
6	A6	24	asb3	2.18239	1.31125
6	A6	25	asb3	2.80093	1.92097
6	A6	26	asb3	3.5595	2.67072
6	A6	27	asb3	4.39278	3.49518
6	A6	28	asb3	5.20314	4.29673
6	A6	29	asb3	5.92802	5.01279
6	A6	30	asb3	6.52292	5.59888
6	A6	31	asb3	7.00518	6.07232
6	A6	32	asb3	7.38889	6.4472
6	A6	33	asb3	7.69676	6.74626
6	A6	34	asb3	7.96027	7.00095
6	A6	35	asb3	8.18366	7.21553
6	A6	36	asb3	8.35972	7.38277
6	A6	37	asb3	8.50664	7.52087
6	A6	38	asb3	8.62919	7.6346
6	A6	39	asb3	8.73332	7.72991
6	A6	40	asb3	8.80173	7.7895
7	A7	1
7	A7	2
7	A7	3
7	A7	4
7	A7	5
7	A7	6
7	A7	7
7	A7	8
7	A7	9
7	A7	10
7	A7	11
7	A7	12
7	A7	13
7	A7	14
7	A7	15
7	A7	16
7	A7	17
7	A7	18
7	A7	19
7	A7	20
7	A7	21
7	A7	22
7	A7	23
7	A7	24
7	A7	25
7	A7	26
7	A7	27
7	A7	28
7	A7	29
7	A7	30
7	A7	31
7	A7	32
7	A7	33
7	A7	34
7	A7	35
7	A7	36
7	A7	37
7	A7	38
7	A7	39
7	A7	40
8	A8	1
8	A8	2
8	A8	3
8	A8	4
8	A8	5
8	A8	6
8	A8	7
8	A8	8
8	A8	9
8	A8	10
8	A8	11
8	A8	12
8	A8	13
8	A8	14
8	A8	15
8	A8	16
8	A8	17
8	A8	18
8	A8	19
8	A8	20
8	A8	21
8	A8	22
8	A8	23
8	A8	24
8	A8	25
8	A8	26
8	A8	27
8	A8	28
8	A8	29
8	A8	30
8	A8	31
8	A8	32
8	A8	33
8	A8	34
8	A8	35
8	A8	36
8	A8	37
8	A8	38
8	A8	39
8	A8	40
9	A9	1
9	A9	2
9	A9	3
9	A9	4
9	A9	5
9	A9	6
9	A9	7
9	A9	8
9	A9	9
9	A9	10
9	A9	11
9	A9	12
9	A9	13
9	A9	14
9	A9	15
9	A9	16
9	A9	17
9	A9	18
9	A9	19
9	A9	20
9	A9	21
9	A9	22
9	A9	23
9	A9	24
9	A9	25
9	A9	26
9	A9	27
9	A9	28
9	A9	29
9	A9	30
9	A9	31
9	A9	32
9	A9	33
9	A9	34
9	A9	35
9	A9	36
9	A9	37
9	A9	38
9	A9	39
9	A9	40
10	A10	1
10	A10	2
10	A10	3
10	A10	4
10	A10	5
10	A10	6
10	A10	7
10	A10	8
10	A10	9
10	A10	10
10	A10	11
10	A10	12
10	A10	13
10	A10	14
10	A10	15
10	A10	16
10	A10	17
10	A10	18
10	A10	19
10	A10	20
10	A10	21
10	A10	22
10	A10	23
10	A10	24
10	A10	25
10	A10	26
10	A10	27
10	A10	28
10	A10	29
10	A10	30
10	A10	31
10	A10	32
10	A10	33
10	A10	34
10	A10	35
10	A10	36
10	A10	37
10	A10	38
10	A10	39
10	A10	40
11	A11	1
11	A11	2
11	A11	3
11	A11	4
11	A11	5
11	A11	6
11	A11	7
11	A11	8
11	A11	9
11	A11	10
11	A11	11
11	A11	12
11	A11	13
11	A11	14
11	A11	15
11	A11	16
11	A11	17
11	A11	18
11	A11	19
11	A11	20
11	A11	21
11	A11	22
11	A11	23
11	A11	24
11	A11	25
11	A11	26
11	A11	27
11	A11	28
11	A11	29
11	A11	30
11	A11	31
11	A11	32
11	A11	33
11	A11	34
11	A11	35
11	A11	36
11	A11	37
11	A11	38
11	A11	39
11	A11	40
12	A12	1
12	A12	2
12	A12	3
12	A12	4
12	A12	5
12	A12	6
12	A12	7
12	A12	8
12	A12	9
12	A12	10
12	A12	11
12	A12	12
12	A12	13
12	A12	14
12	A12	15
12	A12	16
12	A12	17
12	A12	18
12	A12	19
12	A12	20
12	A12	21
12	A12	22
12	A12	23
12	A12	24
12	A12	25
12	A12	26
12	A12	27
12	A12	28
12	A12	29
12	A12	30
12	A12	31
12	A12	32
12	A12	33
12	A12	34
12	A12	35
12	A12	36
12	A12	37
12	A12	38
12	A12	39
12	A12	40
13	B1	1	18s	0.565365	-0.102117
13	B1	2	18s	0.599839	-0.067643
13	B1	3	18s	0.667482	0
13	B1	4	18s	0.773461	0.10598
13	B1	5	18s	0.940144	0.272663
13	B1	6	18s	1.18997	0.522491
13	B1	7	18s	1.53698	0.869501
13	B1	8	18s	2.01144	1.34396
13	B1	9	18s	2.61404	1.94656
13	B1	10	18s	3.32512	2.65764
13	B1	11	18s	4.06461	3.39712
13	B1	12	18s	4.7629	4.09542
13	B1	13	18s	5.36767	4.70018
13	B1	14	18s	5.88056	5.21308
13	B1	15	18s	6.30993	5.64245
13	B1	16	18s	6.647	5.97952
13	B1	17	18s	6.90697	6.23949
13	B1	18	18s	7.12916	6.46168
13	B1	19	18s	7.325	6.65752
13	B1	20	18s	7.48548	6.818
13	B1	21	18s	7.59972	6.93224
13	B1	22	18s	7.69063	7.02315
13	B1	23	18s	7.79497	7.12749
13	B1	24	18s	7.86882	7.20133
13	B1	25	18s	7.9056	7.23812
13	B1	26	18s	7.97344	7.30596
13	B1	27	18s	8.04141	7.37393
13	B1	28	18s	8.10742	7.43994
13	B1	29	18s	8.14758	7.48009
13	B1	30	18s	8.14634	7.47886
13	B1	31	18s	8.15261	7.48512
13	B1	32	18s	8.19245	7.52497
13	B1	33	18s	8.23655	7.56907
13	B1	34	18s	8.2682	7.60072
13	B1	35	18s	8.28718	7.6197
13	B1	36	18s	8.29761	7.63013
13	B1	37	18s	8.31593	7.64845
13	B1	38	18s	8.33477	7.66729
13	B1	39	18s	8.3351	7.66762
13	B1	40	18s	8.34235	7.67487
14	B2	1	18s	0.560707	-0.111674
14	B2	2	18s	0.591944	-0.0804367
14	B2	3	18s	0.672381	0
14	B2	4	18s	0.779204	0.106823
14	B2	5	18s	0.948859	0.276478
14	B2	6	18s	1.20934	0.536955
14	B2	7	18s	1.56685	0.89447
14	B2	8	18s	2.0631	1.39072
14	B2	9	18s	2.71261	2.04023
14	B2	10	18s	3.46651	2.79413
14	B2	11	18s	4.24334	3.57096
14	B2	12	18s	4.97149	4.29911
14	B2	13	18s	5.62412	4.95174
14	B2	14	18s	6.17265	5.50027
14	B2	15	18s	6.63397	5.96158
14	B2	16	18s	7.01528	6.3429
14	B2	17	18s	7.32861	6.65623
14	B2	18	18s	7.58486	6.91248
14	B2	19	18s	7.79421	7.12183
14	B2	20	18s	7.93794	7.26556
14	B2	21	18s	8.07971	7.40733
14	B2	22	18s	8.1955	7.52312
14	B2	23	18s	8.27368	7.6013
14	B2	24	18s	8.35364	7.68126
14	B2	25	18s	8.43243	7.76005
14	B2	26	18s	8.51057	7.83819
14	B2	27	18s	8.57895	7.90657
14	B2	28	18s	8.61294	7.94056
14	B2	29	18s	8.64346	7.97108
14	B2	30	18s	8.6858	8.01342
14	B2	31	18s	8.72258	8.0502
14	B2	32	18s	8.74277	8.07039
14	B2	33	18s	8.78699	8.11461
14	B2	34	18s	8.81321	8.14083
14	B2	35	18s	8.82166	8.14928
14	B2	36	18s	8.8398	8.16742
14	B2	37	18s	8.85055	8.17817
14	B2	38	18s	8.86027	8.18789
14	B2	39	18s	8.88434	8.21196
14	B2	40	18s	8.90671	8.23433
15	B3	1	18s	0.517906	-0.111312
15	B3	2	18s	0.549097	-0.0801216
15	B3	3	18s	0.629218	0
15	B3	4	18s	0.731894	0.102675
15	B3	5	18s	0.89425	0.265032
15	B3	6	18s	1.15073	0.521513
15	B3	7	18s	1.49934	0.870121
15	B3	8	18s	1.96826	1.33904
15	B3	9	18s	2.58502	1.9558
15	B3	10	18s	3.3007	2.67148
15	B3	11	18s	4.03821	3.40899
15	B3	12	18s	4.74495	4.11574
15	B3	13	18s	5.37874	4.74952
15	B3	14	18s	5.92632	5.2971
15	B3	15	18s	6.39262	5.76341
15	B3	16	18s	6.77646	6.14724
15	B3	17	18s	7.07604	6.44682
15	B3	18	18s	7.32663	6.69741
15	B3	19	18s	7.52985	6.90063
15	B3	20	18s	7.70479	7.07557
15	B3	21	18s	7.85713	7.22791
15	B3	22	18s	7.96618	7.33696
15	B3	23	18s	8.07576	7.44654
15	B3	24	18s	8.18685	7.55763
15	B3	25	18s	8.27136	7.64214
15	B3	26	18s	8.33283	7.70361
15	B3	27	18s	8.421	7.79178
15	B3	28	18s	8.48701	7.85779
15	B3	29	18s	8.49679	7.86757
15	B3	30	18s	8.53319	7.90397
15	B3	31	18s	8.55769	7.92847
15	B3	32	18s	8.59082	7.96161
15	B3	33	18s	8.63278	8.00357
15	B3	34	18s	8.65986	8.03064
15	B3	35	18s	8.69415	8.06493
15	B3	36	18s	8.72529	8.09608
15	B3	37	18s	8.74266	8.11344
15	B3	38	18s	8.74566	8.11644
15	B3	39	18s	8.78646	8.15724
15	B3	40	18s	8.81154	8.18232
16	B4	1	asb3	0.559773	-0.0476515
16	B4	2	asb3	0.582138	-0.0351461
16	B4	3	asb3	0.610753	-0.016391
16	B4	4	asb3	0.634196	-0.00280755
16	B4	5	asb3	0.649563	0.0027002
16	B4	6	asb3	0.664667	0.00794468
16	B4	7	asb3	0.671863	0.00528147
16	B4	8	asb3	0.682924	0.00648273
16	B4	9	asb3	0.692555	0.00625437
16	B4	10	asb3	0.699981	0.00382046
16	B4	11	asb3	0.704863	-0.00115702
16	B4	12	asb3	0.715463	-0.000416212
16	B4	13	asb3	0.72354	-0.00219864
16	B4	14	asb3	0.730684	-0.00491401
16	B4	15	asb3	0.740858	-0.00459943
16	B4	16	asb3	0.75364	-0.00167733
16	B4	17	asb3	0.782568	0.0173907
16	B4	18	asb3	0.835078	0.0600417
16	B4	19	asb3	0.931803	0.146907
16	B4	20	asb3	1.09371	0.298956
16	B4	21	asb3	1.35817	0.553558
16	B4	22	asb3	1.71781	0.903338
16	B4	23	asb3	2.2029	1.37857
16	B4	24	asb3	2.82955	1.99535
16	B4	25	asb3	3.57838	2.73433
16	B4	26	asb3	4.38242	3.52851
16	B4	27	asb3	5.16559	4.30181
16	B4	28	asb3	5.86876	4.99513
16	B4	29	asb3	6.47207	5.58858
16	B4	30	asb3	6.95261	6.05926
16	B4	31	asb3	7.32334	6.42013
16	B4	32	asb3	7.67346	6.76039
16	B4	33	asb3	7.93573	7.0128
16	B4	34	asb3	8.12586	7.19308
16	B4	35	asb3	8.32406	7.38141
16	B4	36	asb3	8.47411	7.5216
16	B4	37	asb3	8.59036	7.628
16	B4	38	asb3	8.66449	7.69227
16	B4	39	asb3	8.73951	7.75742
16	B4	40	asb3	8.79298	7.80103
17	B5	1	asb3	0.568035	-0.0554229
17	B5	2	asb3	0.592741	-0.0423394
17	B5	3	asb3	0.624417	-0.0222846
17	B5	4	asb3	0.649345	-0.00897865
17	B5	5	asb3	0.6692	-0.00074533
17	B5	6	asb3	0.68772	0.00615231
17	B5	7	asb3	0.707608	0.0144191
17	B5	8	asb3	0.718703	0.0138919
17	B5	9	asb3	0.728604	0.012171
17	B5	10	asb3	0.736279	0.00822377
17	B5	11	asb3	0.742867	0.00318987
17	B5	12	asb3	0.751013	-0.000285072
17	B5	13	asb3	0.757359	-0.00556085
17	B5	14	asb3	0.765281	-0.00926098
17	B5	15	asb3	0.775231	-0.0109325
17	B5	16	asb3	0.79027	-0.00751538
17	B5	17	asb3	0.820197	0.0107896
17	B5	18	asb3	0.877701	0.0566716
17	B5	19	asb3	0.970322	0.137671
17	B5	20	asb3	1.13283	0.288555
17	B5	21	asb3	1.39226	0.536365
17	B5	22	asb3	1.75016	0.882639
17	B5	23	asb3	2.22713	1.34799
17	B5	24	asb3	2.85777	1.96701
17	B5	25	asb3	3.60302	2.70063
17	B5	26	asb3	4.41639	3.50239
17	B5	27	asb3	5.22409	4.29846
17	B5	28	asb3	5.96757	5.03032
17	B5	29	asb3	6.60124	5.65237
17	B5	30	asb3	7.12623	6.16574
17	B5	31	asb3	7.55356	6.58145
17	B5	32	asb3	7.88889	6.90515
17	B5	33	asb3	8.16971	7.17435
17	B5	34	asb3	8.40532	7.39834
17	B5	35	asb3	8.6032	7.5846
17	B5	36	asb3	8.76148	7.73126
17	B5	37	asb3	8.89596	7.85411
17	B5	38	asb3	8.99929	7.94582
17	B5	39	asb3	9.0925	8.02741
17	B5	40	asb3	9.17254	8.09583
18	B6	1	asb3	0.568327	-0.0572407
18	B6	2	asb3	0.594014	-0.0410031
18	B6	3	asb3	0.629012	-0.0154543
18	B6	4	asb3	0.650569	-0.003347
18	B6	5	asb3	0.666187	0.00282193
18	B6	6	asb3	0.677557	0.00474213
18	B6	7	asb3	0.690945	0.00868071
18	B6	8	asb3	0.697344	0.00563018
18	B6	9	asb3	0.707943	0.00678052
18	B6	10	asb3	0.713956	0.00334351
18	B6	11	asb3	0.720373	0.000311988
18	B6	12	asb3	0.730295	0.000784207
18	B6	13	asb3	0.734766	-0.00419376
18	B6	14	asb3	0.738309	-0.0101001
18	B6	15	asb3	0.754679	-0.00317947
18	B6	16	asb3	0.773442	0.00613397
18	B6	17	asb3	0.79787	0.0211122
18	B6	18	asb3	0.848604	0.0623973
18	B6	19	asb3	0.941482	0.145826
18	B6	20	asb3	1.10591	0.300806
18	B6	21	asb3	1.36626	0.551709
18	B6	22	asb3	1.72499	0.90099
18	B6	23	asb3	2.20512	1.37166
18	B6	24	asb3	2.8328	1.9899
18	B6	25	asb3	3.59054	2.73818
18	B6	26	asb3	4.39991	3.53811
18	B6	27	asb3	5.20713	4.33588
18	B6	28	asb3	5.95125	5.07055
18	B6	29	asb3	6.59099	5.70084
18	B6	30	asb3	7.11374	6.21414
18	B6	31	asb3	7.54394	6.6349
18	B6	32	asb3	7.88946	6.97097
18	B6	33	asb3	8.17482	7.24688
18	B6	34	asb3	8.40688	7.46949
18	B6	35	asb3	8.59192	7.64508
18	B6	36	asb3	8.74228	7.78599
18	B6	37	asb3	8.8785	7.91276
18	B6	38	asb3	8.98699	8.01179
18	B6	39	asb3	9.07262	8.08798
18	B6	40	asb3	9.10235	8.10825
19	B7	1
19	B7	2
19	B7	3
19	B7	4
19	B7	5
19	B7	6
19	B7	7
19	B7	8
19	B7	9
19	B7	10
19	B7	11
19	B7	12
19	B7	13
19	B7	14
19	B7	15
19	B7	16
19	B7	17
19	B7	18
19	B7	19
19	B7	20
19	B7	21
19	B7	22
19	B7	23
19	B7	24
19	B7	25
19	B7	26
19	B7	27
19	B7	28
19	B7	29
19	B7	30
19	B7	31
19	B7	32
19	B7	33
19	B7	34
19	B7	35
19	B7	36
19	B7	37
19	B7	38
19	B7	39
19	B7	40
20	B8	1
20	B8	2
20	B8	3
20	B8	4
20	B8	5
20	B8	6
20	B8	7
20	B8	8
20	B8	9
20	B8	10
20	B8	11
20	B8	12
20	B8	13
20	B8	14
20	B8	15
20	B8	16
20	B8	17
20	B8	18
20	B8	19
20	B8	20
20	B8	21
20	B8	22
20	B8	23
20	B8	24
20	B8	25
20	B8	26
20	B8	27
20	B8	28
20	B8	29
20	B8	30
20	B8	31
20	B8	32
20	B8	33
20	B8	34
20	B8	35
20	B8	36
20	B8	37
20	B8	38
20	B8	39
20	B8	40
21	B9	1
21	B9	2
21	B9	3
21	B9	4
21	B9	5
21	B9	6
21	B9	7
21	B9	8
21	B9	9
21	B9	10
21	B9	11
21	B9	12
21	B9	13
21	B9	14
21	B9	15
21	B9	16
21	B9	17
21	B9	18
21	B9	19
21	B9	20
21	B9	21
21	B9	22
21	B9	23
21	B9	24
21	B9	25
21	B9	26
21	B9	27
21	B9	28
21	B9	29
21	B9	30
21	B9	31
21	B9	32
21	B9	33
21	B9	34
21	B9	35
21	B9	36
21	B9	37
21	B9	38
21	B9	39
21	B9	40
22	B10	1
22	B10	2
22	B10	3
22	B10	4
22	B10	5
22	B10	6
22	B10	7
22	B10	8
22	B10	9
22	B10	10
22	B10	11
22	B10	12
22	B10	13
22	B10	14
22	B10	15
22	B10	16
22	B10	17
22	B10	18
22	B10	19
22	B10	20
22	B10	21
22	B10	22
22	B10	23
22	B10	24
22	B10	25
22	B10	26
22	B10	27
22	B10	28
22	B10	29
22	B10	30
22	B10	31
22	B10	32
22	B10	33
22	B10	34
22	B10	35
22	B10	36
22	B10	37
22	B10	38
22	B10	39
22	B10	40
23	B11	1
23	B11	2
23	B11	3
23	B11	4
23	B11	5
23	B11	6
23	B11	7
23	B11	8
23	B11	9
23	B11	10
23	B11	11
23	B11	12
23	B11	13
23	B11	14
23	B11	15
23	B11	16
23	B11	17
23	B11	18
23	B11	19
23	B11	20
23	B11	21
23	B11	22
23	B11	23
23	B11	24
23	B11	25
23	B11	26
23	B11	27
23	B11	28
23	B11	29
23	B11	30
23	B11	31
23	B11	32
23	B11	33
23	B11	34
23	B11	35
23	B11	36
23	B11	37
23	B11	38
23	B11	39
23	B11	40
24	B12	1
24	B12	2
24	B12	3
24	B12	4
24	B12	5
24	B12	6
24	B12	7
24	B12	8
24	B12	9
24	B12	10
24	B12	11
24	B12	12
24	B12	13
24	B12	14
24	B12	15
24	B12	16
24	B12	17
24	B12	18
24	B12	19
24	B12	20
24	B12	21
24	B12	22
24	B12	23
24	B12	24
24	B12	25
24	B12	26
24	B12	27
24	B12	28
24	B12	29
24	B12	30
24	B12	31
24	B12	32
24	B12	33
24	B12	34
24	B12	35
24	B12	36
24	B12	37
24	B12	38
24	B12	39
24	B12	40
25	C1	1	18s	0.952923	-0.137387
25	C1	2	18s	0.99556	-0.094749
25	C1	3	18s	1.09031	0
25	C1	4	18s	1.21833	0.128016
25	C1	5	18s	1.41752	0.327209
25	C1	6	18s	1.69395	0.603639
25	C1	7	18s	2.06608	0.975766
25	C1	8	18s	2.55902	1.46871
25	C1	9	18s	3.14954	2.05923
25	C1	10	18s	3.78536	2.69505
25	C1	11	18s	4.39378	3.30347
25	C1	12	18s	4.95453	3.86422
25	C1	13	18s	5.4397	4.3494
25	C1	14	18s	5.85368	4.76337
25	C1	15	18s	6.19942	5.10911
25	C1	16	18s	6.4938	5.40349
25	C1	17	18s	6.73911	5.6488
25	C1	18	18s	6.92679	5.83648
25	C1	19	18s	7.08058	5.99027
25	C1	20	18s	7.20258	6.11227
25	C1	21	18s	7.2872	6.19689
25	C1	22	18s	7.37743	6.28712
25	C1	23	18s	7.48498	6.39467
25	C1	24	18s	7.55676	6.46645
25	C1	25	18s	7.57225	6.48194
25	C1	26	18s	7.61516	6.52485
25	C1	27	18s	7.66184	6.57153
25	C1	28	18s	7.70345	6.61314
25	C1	29	18s	7.75035	6.66004
25	C1	30	18s	7.79597	6.70566
25	C1	31	18s	7.82371	6.7334
25	C1	32	18s	7.85162	6.76131
25	C1	33	18s	7.89344	6.80313
25	C1	34	18s	7.91142	6.82112
25	C1	35	18s	7.92487	6.83456
25	C1	36	18s	7.95165	6.86134
25	C1	37	18s	7.96363	6.87332
25	C1	38	18s	7.95876	6.86845
25	C1	39	18s	7.97984	6.88953
25	C1	40	18s	7.99064	6.90033
26	C2	1	18s	0.711041	-0.157306
26	C2	2	18s	0.761945	-0.106402
26	C2	3	18s	0.868347	0
26	C2	4	18s	1.02118	0.152831
26	C2	5	18s	1.24268	0.374334
26	C2	6	18s	1.55339	0.685039
26	C2	7	18s	1.96863	1.10028
26	C2	8	18s	2.5199	1.65155
26	C2	9	18s	3.19409	2.32574
26	C2	10	18s	3.92711	3.05877
26	C2	11	18s	4.63358	3.76524
26	C2	12	18s	5.3037	4.43535
26	C2	13	18s	5.88906	5.02071
26	C2	14	18s	6.37914	5.51079
26	C2	15	18s	6.79559	5.92725
26	C2	16	18s	7.14422	6.27587
26	C2	17	18s	7.42892	6.56057
26	C2	18	18s	7.67083	6.80249
26	C2	19	18s	7.88424	7.01589
26	C2	20	18s	8.04465	7.1763
26	C2	21	18s	8.14253	7.27418
26	C2	22	18s	8.24955	7.3812
26	C2	23	18s	8.32165	7.4533
26	C2	24	18s	8.41538	7.54703
26	C2	25	18s	8.51004	7.64169
26	C2	26	18s	8.58295	7.7146
26	C2	27	18s	8.65515	7.7868
26	C2	28	18s	8.71638	7.84804
26	C2	29	18s	8.75147	7.88312
26	C2	30	18s	8.77505	7.90671
26	C2	31	18s	8.80483	7.93649
26	C2	32	18s	8.82601	7.95766
26	C2	33	18s	8.84708	7.97873
26	C2	34	18s	8.87083	8.00248
26	C2	35	18s	8.89892	8.03057
26	C2	36	18s	8.9106	8.04226
26	C2	37	18s	8.93163	8.06328
26	C2	38	18s	8.95965	8.0913
26	C2	39	18s	8.97114	8.10279
26	C2	40	18s	8.9898	8.12145
27	C3	1	18s	0.741808	-0.168511
27	C3	2	18s	0.792757	-0.117563
27	C3	3	18s	0.91032	0
27	C3	4	18s	1.06498	0.154662
27	C3	5	18s	1.28982	0.379502
27	C3	6	18s	1.6012	0.690884
27	C3	7	18s	2.01836	1.10804
27	C3	8	18s	2.57854	1.66822
27	C3	9	18s	3.25623	2.34591
27	C3	10	18s	3.98183	3.07151
27	C3	11	18s	4.69092	3.7806
27	C3	12	18s	5.35501	4.44469
27	C3	13	18s	5.94404	5.03372
27	C3	14	18s	6.45194	5.54162
27	C3	15	18s	6.87797	5.96765
27	C3	16	18s	7.23436	6.32404
27	C3	17	18s	7.5274	6.61708
27	C3	18	18s	7.76956	6.85924
27	C3	19	18s	7.96503	7.05472
27	C3	20	18s	8.12293	7.21261
27	C3	21	18s	8.26254	7.35222
27	C3	22	18s	8.37179	7.46147
27	C3	23	18s	8.4568	7.54648
27	C3	24	18s	8.55564	7.64532
27	C3	25	18s	8.64077	7.73045
27	C3	26	18s	8.69148	7.78116
27	C3	27	18s	8.73701	7.82669
27	C3	28	18s	8.7904	7.88008
27	C3	29	18s	8.82063	7.91031
27	C3	30	18s	8.86162	7.9513
27	C3	31	18s	8.9008	7.99048
27	C3	32	18s	8.94899	8.03867
27	C3	33	18s	8.98759	8.07727
27	C3	34	18s	9.01583	8.10551
27	C3	35	18s	9.03908	8.12876
27	C3	36	18s	9.04752	8.13721
27	C3	37	18s	9.06127	8.15095
27	C3	38	18s	9.10093	8.19061
27	C3	39	18s	9.12117	8.21086
27	C3	40	18s	9.11942	8.2091
28	C4	1	asb3	0.682649	-0.0693955
28	C4	2	asb3	0.717765	-0.049114
28	C4	3	asb3	0.764273	-0.0174406
28	C4	4	asb3	0.794104	-0.00244374
28	C4	5	asb3	0.81427	0.00288835
28	C4	6	asb3	0.832373	0.00615669
28	C4	7	asb3	0.846717	0.00566654
28	C4	8	asb3	0.865009	0.0091237
28	C4	9	asb3	0.87761	0.00689041
28	C4	10	asb3	0.891914	0.00636026
28	C4	11	asb3	0.898084	-0.00230384
28	C4	12	asb3	0.914035	-0.00118711
28	C4	13	asb3	0.926077	-0.00398009
28	C4	14	asb3	0.935161	-0.00973059
28	C4	15	asb3	0.955052	-0.00467393
28	C4	16	asb3	0.991474	0.0169138
28	C4	17	asb3	1.04946	0.0600685
28	C4	18	asb3	1.14447	0.140237
28	C4	19	asb3	1.31015	0.291091
28	C4	20	asb3	1.55857	0.524668
28	C4	21	asb3	1.90687	0.858136
28	C4	22	asb3	2.37359	1.31002
28	C4	23	asb3	2.96139	1.88299
28	C4	24	asb3	3.65917	2.56594
28	C4	25	asb3	4.42545	3.31738
28	C4	26	asb3	5.18866	4.06576
28	C4	27	asb3	5.86885	4.73111
28	C4	28	asb3	6.47757	5.325
28	C4	29	asb3	6.98245	5.81505
28	C4	30	asb3	7.3866	6.20436
28	C4	31	asb3	7.72835	6.53127
28	C4	32	asb3	8.01777	6.80586
28	C4	33	asb3	8.25674	7.03
28	C4	34	asb3	8.44337	7.20179
28	C4	35	asb3	8.59755	7.34114
28	C4	36	asb3	8.73284	7.46159
28	C4	37	asb3	8.85214	7.56606
28	C4	38	asb3	8.93383	7.63292
28	C4	39	asb3	9.01374	7.69799
28	C4	40	asb3	9.06998	7.73939
29	C5	1	asb3	0.701125	-0.0806163
29	C5	2	asb3	0.738698	-0.0570696
29	C5	3	asb3	0.787888	-0.0219069
29	C5	4	asb3	0.819753	-0.00406827
29	C5	5	asb3	0.841649	0.00380065
29	C5	6	asb3	0.857165	0.00529074
29	C5	7	asb3	0.875342	0.00944033
29	C5	8	asb3	0.892284	0.0123557
29	C5	9	asb3	0.902141	0.00818656
29	C5	10	asb3	0.91785	0.00986864
29	C5	11	asb3	0.92505	0.00304156
29	C5	12	asb3	0.928731	-0.00730339
29	C5	13	asb3	0.940046	-0.0100149
29	C5	14	asb3	0.955397	-0.00869067
29	C5	15	asb3	0.983439	0.0053245
29	C5	16	asb3	1.01173	0.0195895
29	C5	17	asb3	1.06775	0.0615866
29	C5	18	asb3	1.16526	0.145067
29	C5	19	asb3	1.32927	0.295052
29	C5	20	asb3	1.58136	0.533111
29	C5	21	asb3	1.91751	0.855235
29	C5	22	asb3	2.37401	1.29771
29	C5	23	asb3	2.96099	1.87066
29	C5	24	asb3	3.66559	2.56124
29	C5	25	asb3	4.43528	3.3169
29	C5	26	asb3	5.20788	4.07547
29	C5	27	asb3	5.93143	4.78499
29	C5	28	asb3	6.56371	5.40325
29	C5	29	asb3	7.10038	5.9259
29	C5	30	asb3	7.56273	6.37422
29	C5	31	asb3	7.9378	6.73525
29	C5	32	asb3	8.24329	7.02672
29	C5	33	asb3	8.49941	7.26882
29	C5	34	asb3	8.71305	7.46843
29	C5	35	asb3	8.89029	7.63165
29	C5	36	asb3	9.02542	7.75275
29	C5	37	asb3	9.15404	7.86734
29	C5	38	asb3	9.25452	7.95379
29	C5	39	asb3	9.34785	8.0331
29	C5	40	asb3	9.41518	8.0864
30	C6	1	asb3	0.959828	-0.0685868
30	C6	2	asb3	0.993059	-0.0487712
30	C6	3	asb3	1.03626	-0.0189831
30	C6	4	asb3	1.06634	-0.00232414
30	C6	5	asb3	1.08394	0.00186043
30	C6	6	asb3	1.1031	0.00760902
30	C6	7	asb3	1.11722	0.00830982
30	C6	8	asb3	1.1309	0.0085749
30	C6	9	asb3	1.14453	0.00879087
30	C6	10	asb3	1.15553	0.00637244
30	C6	11	asb3	1.15998	-0.00259083
30	C6	12	asb3	1.16993	-0.00605664
30	C6	13	asb3	1.18467	-0.00473679
30	C6	14	asb3	1.196	-0.00682597
30	C6	15	asb3	1.21644	0.000204364
30	C6	16	asb3	1.24715	0.0174952
30	C6	17	asb3	1.30109	0.0580156
30	C6	18	asb3	1.39488	0.138391
30	C6	19	asb3	1.5513	0.281398
30	C6	20	asb3	1.78911	0.505787
30	C6	21	asb3	2.12143	0.824698
30	C6	22	asb3	2.55747	1.24732
30	C6	23	asb3	3.11481	1.79125
30	C6	24	asb3	3.78698	2.45
30	C6	25	asb3	4.52348	3.17308
30	C6	26	asb3	5.23733	3.87351
30	C6	27	asb3	5.90971	4.53248
30	C6	28	asb3	6.51388	5.12323
30	C6	29	asb3	7.032	5.62794
30	C6	30	asb3	7.45208	6.0346
30	C6	31	asb3	7.79113	6.36024
30	C6	32	asb3	8.07542	6.63111
30	C6	33	asb3	8.29688	6.83916
30	C6	34	asb3	8.48969	7.01855
30	C6	35	asb3	8.64447	7.15991
30	C6	36	asb3	8.77516	7.27719
30	C6	37	asb3	8.88702	7.37563
30	C6	38	asb3	8.99161	7.46681
30	C6	39	asb3	9.08339	7.54517
30	C6	40	asb3	9.14823	7.5966
31	C7	1
31	C7	2
31	C7	3
31	C7	4
31	C7	5
31	C7	6
31	C7	7
31	C7	8
31	C7	9
31	C7	10
31	C7	11
31	C7	12
31	C7	13
31	C7	14
31	C7	15
31	C7	16
31	C7	17
31	C7	18
31	C7	19
31	C7	20
31	C7	21
31	C7	22
31	C7	23
31	C7	24
31	C7	25
31	C7	26
31	C7	27
31	C7	28
31	C7	29
31	C7	30
31	C7	31
31	C7	32
31	C7	33
31	C7	34
31	C7	35
31	C7	36
31	C7	37
31	C7	38
31	C7	39
31	C7	40
32	C8	1
32	C8	2
32	C8	3
32	C8	4
32	C8	5
32	C8	6
32	C8	7
32	C8	8
32	C8	9
32	C8	10
32	C8	11
32	C8	12
32	C8	13
32	C8	14
32	C8	15
32	C8	16
32	C8	17
32	C8	18
32	C8	19
32	C8	20
32	C8	21
32	C8	22
32	C8	23
32	C8	24
32	C8	25
32	C8	26
32	C8	27
32	C8	28
32	C8	29
32	C8	30
32	C8	31
32	C8	32
32	C8	33
32	C8	34
32	C8	35
32	C8	36
32	C8	37
32	C8	38
32	C8	39
32	C8	40
33	C9	1
33	C9	2
33	C9	3
33	C9	4
33	C9	5
33	C9	6
33	C9	7
33	C9	8
33	C9	9
33	C9	10
33	C9	11
33	C9	12
33	C9	13
33	C9	14
33	C9	15
33	C9	16
33	C9	17
33	C9	18
33	C9	19
33	C9	20
33	C9	21
33	C9	22
33	C9	23
33	C9	24
33	C9	25
33	C9	26
33	C9	27
33	C9	28
33	C9	29
33	C9	30
33	C9	31
33	C9	32
33	C9	33
33	C9	34
33	C9	35
33	C9	36
33	C9	37
33	C9	38
33	C9	39
33	C9	40
34	C10	1
34	C10	2
34	C10	3
34	C10	4
34	C10	5
34	C10	6
34	C10	7
34	C10	8
34	C10	9
34	C10	10
34	C10	11
34	C10	12
34	C10	13
34	C10	14
34	C10	15
34	C10	16
34	C10	17
34	C10	18
34	C10	19
34	C10	20
34	C10	21
34	C10	22
34	C10	23
34	C10	24
34	C10	25
34	C10	26
34	C10	27
34	C10	28
34	C10	29
34	C10	30
34	C10	31
34	C10	32
34	C10	33
34	C10	34
34	C10	35
34	C10	36
34	C10	37
34	C10	38
34	C10	39
34	C10	40
35	C11	1
35	C11	2
35	C11	3
35	C11	4
35	C11	5
35	C11	6
35	C11	7
35	C11	8
35	C11	9
35	C11	10
35	C11	11
35	C11	12
35	C11	13
35	C11	14
35	C11	15
35	C11	16
35	C11	17
35	C11	18
35	C11	19
35	C11	20
35	C11	21
35	C11	22
35	C11	23
35	C11	24
35	C11	25
35	C11	26
35	C11	27
35	C11	28
35	C11	29
35	C11	30
35	C11	31
35	C11	32
35	C11	33
35	C11	34
35	C11	35
35	C11	36
35	C11	37
35	C11	38
35	C11	39
35	C11	40
36	C12	1
36	C12	2
36	C12	3
36	C12	4
36	C12	5
36	C12	6
36	C12	7
36	C12	8
36	C12	9
36	C12	10
36	C12	11
36	C12	12
36	C12	13
36	C12	14
36	C12	15
36	C12	16
36	C12	17
36	C12	18
36	C12	19
36	C12	20
36	C12	21
36	C12	22
36	C12	23
36	C12	24
36	C12	25
36	C12	26
36	C12	27
36	C12	28
36	C12	29
36	C12	30
36	C12	31
36	C12	32
36	C12	33
36	C12	34
36	C12	35
36	C12	36
36	C12	37
36	C12	38
36	C12	39
36	C12	40
37	D1	1	18s	0.691682	-0.156906
37	D1	2	18s	0.740848	-0.10774
37	D1	3	18s	0.848588	0
37	D1	4	18s	0.97833	0.129742
37	D1	5	18s	1.17366	0.325072
37	D1	6	18s	1.46329	0.614705
37	D1	7	18s	1.84729	0.998707
37	D1	8	18s	2.35379	1.50521
37	D1	9	18s	2.9828	2.13422
37	D1	10	18s	3.67097	2.82239
37	D1	11	18s	4.35304	3.50446
37	D1	12	18s	4.97814	4.12956
37	D1	13	18s	5.54521	4.69662
37	D1	14	18s	6.03308	5.1845
37	D1	15	18s	6.41381	5.56522
37	D1	16	18s	6.7358	5.88721
37	D1	17	18s	7.00386	6.15527
37	D1	18	18s	7.22779	6.37921
37	D1	19	18s	7.4021	6.55351
37	D1	20	18s	7.54918	6.70059
37	D1	21	18s	7.65821	6.80962
37	D1	22	18s	7.76476	6.91617
37	D1	23	18s	7.86702	7.01844
37	D1	24	18s	7.94488	7.09629
37	D1	25	18s	7.9969	7.14831
37	D1	26	18s	8.06406	7.21547
37	D1	27	18s	8.1119	7.26332
37	D1	28	18s	8.13375	7.28516
37	D1	29	18s	8.14904	7.30045
37	D1	30	18s	8.19938	7.35079
37	D1	31	18s	8.24441	7.39582
37	D1	32	18s	8.28822	7.43964
37	D1	33	18s	8.30758	7.45899
37	D1	34	18s	8.31848	7.46989
37	D1	35	18s	8.33263	7.48404
37	D1	36	18s	8.34353	7.49494
37	D1	37	18s	8.35674	7.50816
37	D1	38	18s	8.37564	7.52705
37	D1	39	18s	8.40152	7.55294
37	D1	40	18s	8.40592	7.55733
38	D2	1	18s	0.849761	-0.166947
38	D2	2	18s	0.904073	-0.112635
38	D2	3	18s	1.01671	0
38	D2	4	18s	1.15677	0.140062
38	D2	5	18s	1.35757	0.34086
38	D2	6	18s	1.64069	0.62398
38	D2	7	18s	2.02088	1.00418
38	D2	8	18s	2.52887	1.51216
38	D2	9	18s	3.14686	2.13015
38	D2	10	18s	3.84097	2.82426
38	D2	11	18s	4.54078	3.52407
38	D2	12	18s	5.21298	4.19627
38	D2	13	18s	5.80597	4.78926
38	D2	14	18s	6.3336	5.31689
38	D2	15	18s	6.77964	5.76294
38	D2	16	18s	7.15758	6.14087
38	D2	17	18s	7.45671	6.44001
38	D2	18	18s	7.70628	6.68957
38	D2	19	18s	7.91695	6.90025
38	D2	20	18s	8.07939	7.06268
38	D2	21	18s	8.19965	7.18294
38	D2	22	18s	8.3244	7.30769
38	D2	23	18s	8.4657	7.44899
38	D2	24	18s	8.56727	7.55056
38	D2	25	18s	8.62857	7.61186
38	D2	26	18s	8.70012	7.68341
38	D2	27	18s	8.75742	7.74071
38	D2	28	18s	8.81201	7.7953
38	D2	29	18s	8.84586	7.82915
38	D2	30	18s	8.88325	7.86654
38	D2	31	18s	8.91638	7.89967
38	D2	32	18s	8.95626	7.93955
38	D2	33	18s	8.99031	7.9736
38	D2	34	18s	9.02144	8.00473
38	D2	35	18s	9.05379	8.03709
38	D2	36	18s	9.07487	8.05817
38	D2	37	18s	9.09341	8.0767
38	D2	38	18s	9.09641	8.0797
38	D2	39	18s	9.11058	8.09387
38	D2	40	18s	9.13029	8.11358
39	D3	1	18s	0.763997	-0.151484
39	D3	2	18s	0.809877	-0.105605
39	D3	3	18s	0.915482	0
39	D3	4	18s	1.05109	0.135604
39	D3	5	18s	1.25078	0.335301
39	D3	6	18s	1.53705	0.621566
39	D3	7	18s	1.92874	1.01326
39	D3	8	18s	2.45605	1.54057
39	D3	9	18s	3.10945	2.19397
39	D3	10	18s	3.83085	2.91537
39	D3	11	18s	4.56489	3.64941
39	D3	12	18s	5.25954	4.34406
39	D3	13	18s	5.87437	4.95889
39	D3	14	18s	6.40739	5.4919
39	D3	15	18s	6.86912	5.95364
39	D3	16	18s	7.25918	6.3437
39	D3	17	18s	7.56851	6.65302
39	D3	18	18s	7.83843	6.92295
39	D3	19	18s	8.06285	7.14737
39	D3	20	18s	8.25066	7.33517
39	D3	21	18s	8.39257	7.47709
39	D3	22	18s	8.50795	7.59246
39	D3	23	18s	8.62393	7.70845
39	D3	24	18s	8.71255	7.79707
39	D3	25	18s	8.79074	7.87526
39	D3	26	18s	8.87432	7.95884
39	D3	27	18s	8.94561	8.03013
39	D3	28	18s	9.00653	8.09104
39	D3	29	18s	9.04228	8.1268
39	D3	30	18s	9.07662	8.16114
39	D3	31	18s	9.12086	8.20537
39	D3	32	18s	9.17423	8.25875
39	D3	33	18s	9.21832	8.30284
39	D3	34	18s	9.23896	8.32348
39	D3	35	18s	9.25878	8.3433
39	D3	36	18s	9.28122	8.36574
39	D3	37	18s	9.29177	8.37629
39	D3	38	18s	9.31202	8.39653
39	D3	39	18s	9.33525	8.41977
39	D3	40	18s	9.35104	8.43555
40	D4	1	asb3	0.704521	-0.0758209
40	D4	2	asb3	0.742601	-0.0526592
40	D4	3	asb3	0.79302	-0.0171593
40	D4	4	asb3	0.822987	-0.00211139
40	D4	5	asb3	0.839983	-3.43727e-05
40	D4	6	asb3	0.862151	0.0072149
40	D4	7	asb3	0.880117	0.0102622
40	D4	8	asb3	0.891536	0.00676234
40	D4	9	asb3	0.905988	0.00629537
40	D4	10	asb3	0.918056	0.00344517
40	D4	11	asb3	0.931501	0.00197113
40	D4	12	asb3	0.941871	-0.00257792
40	D4	13	asb3	0.953399	-0.00596855
40	D4	14	asb3	0.966187	-0.00809962
40	D4	15	asb3	0.984807	-0.00439861
40	D4	16	asb3	1.01994	0.0158115
40	D4	17	asb3	1.07656	0.0575194
40	D4	18	asb3	1.17605	0.142089
40	D4	19	asb3	1.33906	0.290175
40	D4	20	asb3	1.59338	0.529583
40	D4	21	asb3	1.94384	0.865125
40	D4	22	asb3	2.41303	1.3194
40	D4	23	asb3	3.01907	1.91051
40	D4	24	asb3	3.74465	2.62117
40	D4	25	asb3	4.51104	3.37265
40	D4	26	asb3	5.27743	4.12411
40	D4	27	asb3	5.97663	4.8084
40	D4	28	asb3	6.58766	5.40451
40	D4	29	asb3	7.11885	5.92078
40	D4	30	asb3	7.55265	6.33966
40	D4	31	asb3	7.89479	6.66689
40	D4	32	asb3	8.17387	6.93104
40	D4	33	asb3	8.40126	7.14352
40	D4	34	asb3	8.59282	7.32016
40	D4	35	asb3	8.74358	7.456
40	D4	36	asb3	8.86442	7.56192
40	D4	37	asb3	8.96314	7.64572
40	D4	38	asb3	9.05642	7.72408
40	D4	39	asb3	9.1376	7.79035
40	D4	40	asb3	9.21088	7.8487
41	D5	1	asb3	0.721331	-0.0745629
41	D5	2	asb3	0.755901	-0.0546759
41	D5	3	asb3	0.810231	-0.0150281
41	D5	4	asb3	0.839364	-0.000577286
41	D5	5	asb3	0.856164	0.00154005
41	D5	6	asb3	0.873723	0.00441622
41	D5	7	asb3	0.890824	0.00683528
41	D5	8	asb3	0.90386	0.00518835
41	D5	9	asb3	0.920914	0.0075608
41	D5	10	asb3	0.93463	0.00659431
41	D5	11	asb3	0.944184	0.00146575
41	D5	12	asb3	0.947087	-0.010314
41	D5	13	asb3	0.967048	-0.00503549
41	D5	14	asb3	0.98412	-0.00264588
41	D5	15	asb3	1.00413	0.00267968
41	D5	16	asb3	1.03517	0.019037
41	D5	17	asb3	1.09032	0.0595035
41	D5	18	asb3	1.18642	0.140927
41	D5	19	asb3	1.3512	0.29102
41	D5	20	asb3	1.60882	0.533956
41	D5	21	asb3	1.96082	0.871282
41	D5	22	asb3	2.42598	1.32175
41	D5	23	asb3	3.02888	1.90998
41	D5	24	asb3	3.74634	2.61275
41	D5	25	asb3	4.51143	3.36315
41	D5	26	asb3	5.29546	4.13251
41	D5	27	asb3	6.01876	4.84113
41	D5	28	asb3	6.65622	5.4639
41	D5	29	asb3	7.1848	5.9778
41	D5	30	asb3	7.59053	6.36884
41	D5	31	asb3	7.94349	6.70712
41	D5	32	asb3	8.24584	6.99479
41	D5	33	asb3	8.48581	7.22008
41	D5	34	asb3	8.68294	7.40253
41	D5	35	asb3	8.84824	7.55314
41	D5	36	asb3	8.98485	7.67508
41	D5	37	asb3	9.0894	7.76494
41	D5	38	asb3	9.19281	7.85367
41	D5	39	asb3	9.27651	7.92268
41	D5	40	asb3	9.32595	7.95744
42	D6	1	asb3	0.754319	-0.0781097
42	D6	2	asb3	0.791636	-0.0556319
42	D6	3	asb3	0.840507	-0.0215999
42	D6	4	asb3	0.871353	-0.00559352
42	D6	5	asb3	0.897133	0.00534785
42	D6	6	asb3	0.916871	0.0102457
42	D6	7	asb3	0.9298	0.00833568
42	D6	8	asb3	0.945828	0.0095243
42	D6	9	asb3	0.958973	0.00783007
42	D6	10	asb3	0.970859	0.00487688
42	D6	11	asb3	0.982904	0.00208248
42	D6	12	asb3	0.99087	-0.00479013
42	D6	13	asb3	1.00312	-0.00738289
42	D6	14	asb3	1.01646	-0.00887654
42	D6	15	asb3	1.03855	-0.00162405
42	D6	16	asb3	1.07063	0.0156114
42	D6	17	asb3	1.12643	0.0565745
42	D6	18	asb3	1.22599	0.141298
42	D6	19	asb3	1.3995	0.299963
42	D6	20	asb3	1.652	0.537626
42	D6	21	asb3	2.0046	0.875385
42	D6	22	asb3	2.4822	1.33815
42	D6	23	asb3	3.08716	1.92827
42	D6	24	asb3	3.83929	2.66556
42	D6	25	asb3	4.64269	3.45412
42	D6	26	asb3	5.43105	4.22764
42	D6	27	asb3	6.15904	4.94079
42	D6	28	asb3	6.8134	5.58031
42	D6	29	asb3	7.36144	6.11352
42	D6	30	asb3	7.80739	6.54462
42	D6	31	asb3	8.17894	6.90133
42	D6	32	asb3	8.46479	7.17234
42	D6	33	asb3	8.71224	7.40495
42	D6	34	asb3	8.93486	7.61273
42	D6	35	asb3	9.10511	7.76814
42	D6	36	asb3	9.2279	7.8761
42	D6	37	asb3	9.34418	7.97754
42	D6	38	asb3	9.46715	8.08566
42	D6	39	asb3	9.56366	8.16734
42	D6	40	asb3	9.62915	8.21799
43	D7	1
43	D7	2
43	D7	3
43	D7	4
43	D7	5
43	D7	6
43	D7	7
43	D7	8
43	D7	9
43	D7	10
43	D7	11
43	D7	12
43	D7	13
43	D7	14
43	D7	15
43	D7	16
43	D7	17
43	D7	18
43	D7	19
43	D7	20
43	D7	21
43	D7	22
43	D7	23
43	D7	24
43	D7	25
43	D7	26
43	D7	27
43	D7	28
43	D7	29
43	D7	30
43	D7	31
43	D7	32
43	D7	33
43	D7	34
43	D7	35
43	D7	36
43	D7	37
43	D7	38
43	D7	39
43	D7	40
44	D8	1
44	D8	2
44	D8	3
44	D8	4
44	D8	5
44	D8	6
44	D8	7
44	D8	8
44	D8	9
44	D8	10
44	D8	11
44	D8	12
44	D8	13
44	D8	14
44	D8	15
44	D8	16
44	D8	17
44	D8	18
44	D8	19
44	D8	20
44	D8	21
44	D8	22
44	D8	23
44	D8	24
44	D8	25
44	D8	26
44	D8	27
44	D8	28
44	D8	29
44	D8	30
44	D8	31
44	D8	32
44	D8	33
44	D8	34
44	D8	35
44	D8	36
44	D8	37
44	D8	38
44	D8	39
44	D8	40
45	D9	1
45	D9	2
45	D9	3
45	D9	4
45	D9	5
45	D9	6
45	D9	7
45	D9	8
45	D9	9
45	D9	10
45	D9	11
45	D9	12
45	D9	13
45	D9	14
45	D9	15
45	D9	16
45	D9	17
45	D9	18
45	D9	19
45	D9	20
45	D9	21
45	D9	22
45	D9	23
45	D9	24
45	D9	25
45	D9	26
45	D9	27
45	D9	28
45	D9	29
45	D9	30
45	D9	31
45	D9	32
45	D9	33
45	D9	34
45	D9	35
45	D9	36
45	D9	37
45	D9	38
45	D9	39
45	D9	40
46	D10	1
46	D10	2
46	D10	3
46	D10	4
46	D10	5
46	D10	6
46	D10	7
46	D10	8
46	D10	9
46	D10	10
46	D10	11
46	D10	12
46	D10	13
46	D10	14
46	D10	15
46	D10	16
46	D10	17
46	D10	18
46	D10	19
46	D10	20
46	D10	21
46	D10	22
46	D10	23
46	D10	24
46	D10	25
46	D10	26
46	D10	27
46	D10	28
46	D10	29
46	D10	30
46	D10	31
46	D10	32
46	D10	33
46	D10	34
46	D10	35
46	D10	36
46	D10	37
46	D10	38
46	D10	39
46	D10	40
47	D11	1
47	D11	2
47	D11	3
47	D11	4
47	D11	5
47	D11	6
47	D11	7
47	D11	8
47	D11	9
47	D11	10
47	D11	11
47	D11	12
47	D11	13
47	D11	14
47	D11	15
47	D11	16
47	D11	17
47	D11	18
47	D11	19
47	D11	20
47	D11	21
47	D11	22
47	D11	23
47	D11	24
47	D11	25
47	D11	26
47	D11	27
47	D11	28
47	D11	29
47	D11	30
47	D11	31
47	D11	32
47	D11	33
47	D11	34
47	D11	35
47	D11	36
47	D11	37
47	D11	38
47	D11	39
47	D11	40
48	D12	1
48	D12	2
48	D12	3
48	D12	4
48	D12	5
48	D12	6
48	D12	7
48	D12	8
48	D12	9
48	D12	10
48	D12	11
48	D12	12
48	D12	13
48	D12	14
48	D12	15
48	D12	16
48	D12	17
48	D12	18
48	D12	19
48	D12	20
48	D12	21
48	D12	22
48	D12	23
48	D12	24
48	D12	25
48	D12	26
48	D12	27
48	D12	28
48	D12	29
48	D12	30
48	D12	31
48	D12	32
48	D12	33
48	D12	34
48	D12	35
48	D12	36
48	D12	37
48	D12	38
48	D12	39
48	D12	40
49	E1	1	18s	0.667782	-0.144711
49	E1	2	18s	0.712035	-0.100458
49	E1	3	18s	0.812493	0
49	E1	4	18s	0.942636	0.130143
49	E1	5	18s	1.13336	0.320865
49	E1	6	18s	1.40602	0.593526
49	E1	7	18s	1.78017	0.967676
49	E1	8	18s	2.27739	1.4649
49	E1	9	18s	2.89219	2.0797
49	E1	10	18s	3.55815	2.74566
49	E1	11	18s	4.22216	3.40967
49	E1	12	18s	4.84786	4.03536
49	E1	13	18s	5.41877	4.60628
49	E1	14	18s	5.91284	5.10034
49	E1	15	18s	6.30018	5.48769
49	E1	16	18s	6.62393	5.81143
49	E1	17	18s	6.90342	6.09093
49	E1	18	18s	7.12748	6.31499
49	E1	19	18s	7.31553	6.50304
49	E1	20	18s	7.48311	6.67061
49	E1	21	18s	7.60135	6.78885
49	E1	22	18s	7.71504	6.90255
49	E1	23	18s	7.83154	7.01904
49	E1	24	18s	7.93963	7.12714
49	E1	25	18s	8.01466	7.20217
49	E1	26	18s	8.02164	7.20915
49	E1	27	18s	8.07344	7.26095
49	E1	28	18s	8.12371	7.31122
49	E1	29	18s	8.16852	7.35602
49	E1	30	18s	8.19691	7.38442
49	E1	31	18s	8.2194	7.40691
49	E1	32	18s	8.26698	7.45449
49	E1	33	18s	8.30402	7.49152
[truncated: 1,887 more rows]

## Sheet: Results
Block Type	96-Well 0.2-mL Block
Calibration Background is expired	No
Calibration Background performed on	08-01-2022
Calibration Pure Dye ABY is expired	No
Calibration Pure Dye ABY performed on	08-01-2022
Calibration Pure Dye CY5 is expired	No
Calibration Pure Dye CY5 performed on	08-01-2022
Calibration Pure Dye FAM is expired	No
Calibration Pure Dye FAM performed on	08-01-2022
Calibration Pure Dye JUN is expired	No
Calibration Pure Dye JUN performed on	08-01-2022
Calibration Pure Dye MUSTANG PURPLE is expired	No
Calibration Pure Dye MUSTANG PURPLE performed on	08-01-2022
Calibration Pure Dye NED is expired	No
Calibration Pure Dye NED performed on	08-01-2022
Calibration Pure Dye ROX is expired	No
Calibration Pure Dye ROX performed on	08-01-2022
Calibration Pure Dye SYBR is expired	No
Calibration Pure Dye SYBR performed on	08-01-2022
Calibration Pure Dye TAMRA is expired	No
Calibration Pure Dye TAMRA performed on	08-01-2022
Calibration Pure Dye VIC is expired	No
Calibration Pure Dye VIC performed on	08-01-2022
Calibration ROI is expired	No
Calibration ROI performed on	08-01-2022
Calibration Uniformity is expired	No
Calibration Uniformity performed on	08-01-2022
Chemistry	SYBR_GREEN
Date Created	2023-12-01 02:27:14 AM CST
Experiment Barcode
Experiment Comment
Experiment File Name	D:\datas\huang lab\qxy\2023-12-01_004614.eds
Experiment Name	2023-12-01_004614
Experiment Run End Time	2023-11-30 23:21:19 PM CST
Experiment Type	Standard Curve
Instrument Name	272520824
Instrument Serial Number	272520824
Instrument Type	QuantStudio™ 5 System
Passive Reference	ROX
Post-read Stage/Step
Pre-read Stage/Step
Quantification Cycle Method	Ct
Signal Smoothing On	true
Stage where Melt Analysis is performed	Stage3
Stage/ Cycle where Ct Analysis is performed	Stage2, Step2
User Name
Well	Well Position	Omit	Sample Name	Target Name	Task	Reporter	Quencher	CT	Ct Mean	Ct SD	Quantity	Quantity Mean	Quantity SD	Y-Intercept	R(superscript 2)	Slope	Efficiency	Automatic Ct Threshold	Ct Threshold	Automatic Baseline	Baseline Start	Baseline End	Amp Status	Comments	Cq Conf	MTP	Tm1	Tm2	Tm3	Tm4
1	A1	FALSE	1w	18s	UNKNOWN	SYBR	None	6.67972	6.60059	0.0690104								TRUE	0.745195	TRUE	3	3	Amp		0.96019	N	84.2365
2	A2	FALSE	1w	18s	UNKNOWN	SYBR	None	6.56921	6.60059	0.0690104								TRUE	0.745195	TRUE	3	3	Amp		0.911115	N	84.0905
3	A3	FALSE	1w	18s	UNKNOWN	SYBR	None	6.55285	6.60059	0.0690104								TRUE	0.745195	TRUE	3	3	Amp		0.926981	N	84.115
4	A4	FALSE	1w	asb3	UNKNOWN	SYBR	None	23.1127	23.1279	0.0208354								TRUE	0.904229	TRUE	3	16	Amp		0.92366	N	82.3613
5	A5	FALSE	1w	asb3	UNKNOWN	SYBR	None	23.1516	23.1279	0.0208354								TRUE	0.904229	TRUE	3	16	Amp		0.927207	N	82.316
6	A6	FALSE	1w	asb3	UNKNOWN	SYBR	None	23.1194	23.1279	0.0208354								TRUE	0.904229	TRUE	3	16	Amp		0.924901	N	82.4618
13	B1	FALSE	2w	18s	UNKNOWN	SYBR	None	6.67212	6.65875	0.0317671								TRUE	0.745195	TRUE	3	3	Amp		0.934124	N	84.0905
14	B2	FALSE	2w	18s	UNKNOWN	SYBR	None	6.62249	6.65875	0.0317671								TRUE	0.745195	TRUE	3	3	Amp		0.9065	N	84.0905
15	B3	FALSE	2w	18s	UNKNOWN	SYBR	None	6.68165	6.65875	0.0317671								TRUE	0.745195	TRUE	3	3	Amp		0.872574	N	83.9688
16	B4	FALSE	2w	asb3	UNKNOWN	SYBR	None	21.9945	22.0156	0.0283834								TRUE	0.904229	TRUE	3	15	Amp		0.9273	N	82.3613
17	B5	FALSE	2w	asb3	UNKNOWN	SYBR	None	22.0478	22.0156	0.0283834								TRUE	0.904229	TRUE	3	15	Amp		0.915312	N	82.316
18	B6	FALSE	2w	asb3	UNKNOWN	SYBR	None	22.0043	22.0156	0.0283834								TRUE	0.904229	TRUE	3	14	Amp		0.92226	N	82.4618
25	C1	FALSE	3w	18s	UNKNOWN	SYBR	None	6.40451	6.23535	0.146769								TRUE	0.745195	TRUE	3	3	Amp		0.913617	N	84.0905
26	C2	FALSE	3w	18s	UNKNOWN	SYBR	None	6.1597	6.23535	0.146769								TRUE	0.745195	TRUE	3	3	Amp		0.894531	N	83.9445
27	C3	FALSE	3w	18s	UNKNOWN	SYBR	None	6.14183	6.23535	0.146769								TRUE	0.745195	TRUE	3	3	Amp		0.902788	N	83.9688
28	C4	FALSE	3w	asb3	UNKNOWN	SYBR	None	21.1034	21.1414	0.0569952								TRUE	0.904229	TRUE	3	14	Amp		0.889835	N	82.3613
29	C5	FALSE	3w	asb3	UNKNOWN	SYBR	None	21.1138	21.1414	0.0569952								TRUE	0.904229	TRUE	3	14	Amp		0.893841	N	82.316
30	C6	FALSE	3w	asb3	UNKNOWN	SYBR	None	21.2069	21.1414	0.0569952								TRUE	0.904229	TRUE	3	14	Amp		0.895402	N	82.4618
37	D1	FALSE	4w	18s	UNKNOWN	SYBR	None	6.37268	6.35296	0.017078								TRUE	0.745195	TRUE	3	3	Amp		0.914131	N	83.9445
38	D2	FALSE	4w	18s	UNKNOWN	SYBR	None	6.34344	6.35296	0.017078								TRUE	0.745195	TRUE	3	3	Amp		0.906053	N	83.7985
39	D3	FALSE	4w	18s	UNKNOWN	SYBR	None	6.34276	6.35296	0.017078								TRUE	0.745195	TRUE	3	3	Amp		0.903176	N	83.9688
40	D4	FALSE	4w	asb3	UNKNOWN	SYBR	None	21.0906	21.0776	0.0134833								TRUE	0.904229	TRUE	3	14	Amp		0.888819	N	82.3613
41	D5	FALSE	4w	asb3	UNKNOWN	SYBR	None	21.0785	21.0776	0.0134833								TRUE	0.904229	TRUE	3	14	Amp		0.893053	N	82.316
42	D6	FALSE	4w	asb3	UNKNOWN	SYBR	None	21.0637	21.0776	0.0134833								TRUE	0.904229	TRUE	3	14	Amp		0.893318	N	82.4618
49	E1	FALSE	5w	18s	UNKNOWN	SYBR	None	6.43407	6.36958	0.0685456								TRUE	0.745195	TRUE	3	3	Amp		0.871207	N	83.9445
50	E2	FALSE	5w	18s	UNKNOWN	SYBR	None	6.37707	6.36958	0.0685456								TRUE	0.745195	TRUE	3	3	Amp		0.892331	N	83.7985
51	E3	FALSE	5w	18s	UNKNOWN	SYBR	None	6.2976	6.36958	0.0685456								TRUE	0.745195	TRUE	3	3	Amp		0.875197	N	84.115
52	E4	FALSE	5w	asb3	UNKNOWN	SYBR	None	21.4662	21.4623	0.0134772								TRUE	0.904229	TRUE	3	14	Amp		0.902257	N	82.3613
53	E5	FALSE	5w	asb3	UNKNOWN	SYBR	None	21.4735	21.4623	0.0134772								TRUE	0.904229	TRUE	3	15	Amp		0.905378	N	82.316
54	E6	FALSE	5w	asb3	UNKNOWN	SYBR	None	21.4473	21.4623	0.0134772								TRUE	0.904229	TRUE	3	14	Amp		0.903381	N	82.316
61	F1	FALSE	6w	18s	UNKNOWN	SYBR	None	6.09509	5.99173	0.0972701								TRUE	0.745195	TRUE	3	3	Amp		0.885196	N	83.7985
62	F2	FALSE	6w	18s	UNKNOWN	SYBR	None	5.97812	5.99173	0.0972701								TRUE	0.745195	TRUE	3	3	Amp		0.908793	N	83.6525
63	F3	FALSE	6w	18s	UNKNOWN	SYBR	None	5.90198	5.99173	0.0972701								TRUE	0.745195	TRUE	3	3	Amp		0.867875	N	83.9688
64	F4	FALSE	6w	asb3	UNKNOWN	SYBR	None	21.6947	21.7242	0.025658								TRUE	0.904229	TRUE	3	14	Amp		0.889807	N	82.3613
65	F5	FALSE	6w	asb3	UNKNOWN	SYBR	None	21.7406	21.7242	0.025658								TRUE	0.904229	TRUE	3	15	Amp		0.893604	Y	82.1701	74.8775
66	F6	FALSE	6w	asb3	UNKNOWN	SYBR	None	21.7375	21.7242	0.025658								TRUE	0.904229	TRUE	3	15	Amp		0.893101	Y	82.1701	75.1693
73	G1	FALSE	7w	18s	UNKNOWN	SYBR	None	6.42819	6.35164	0.078248								TRUE	0.745195	TRUE	3	3	Amp		0.871003	N	83.7985
74	G2	FALSE	7w	18s	UNKNOWN	SYBR	None	6.35493	6.35164	0.078248								TRUE	0.745195	TRUE	3	3	Amp		0.884276	N	83.7985
75	G3	FALSE	7w	18s	UNKNOWN	SYBR	None	6.2718	6.35164	0.078248								TRUE	0.745195	TRUE	3	3	Amp		0.884606	N	83.9688
76	G4	FALSE	7w	asb3	UNKNOWN	SYBR	None	21.4242	21.4242	0.0492163								TRUE	0.904229	TRUE	3	15	Amp		0.886864	N	82.3613
77	G5	FALSE	7w	asb3	UNKNOWN	SYBR	None	21.3749	21.4242	0.0492163								TRUE	0.904229	TRUE	3	14	Amp		0.895976	N	82.1701
78	G6	FALSE	7w	asb3	UNKNOWN	SYBR	None	21.4733	21.4242	0.0492163								TRUE	0.904229	TRUE	3	14	Amp		0.896989	N	82.1701
85	H1	FALSE	8w	18s	UNKNOWN	SYBR	None	5.93916	5.77494	0.151261								TRUE	0.745195	TRUE	3	3	Amp		0.90276	N	83.7985
86	H2	FALSE	8w	18s	UNKNOWN	SYBR	None	5.74433	5.77494	0.151261								TRUE	0.745195	TRUE	3	3	Amp		0.876582	N	83.9445
87	H3	FALSE	8w	18s	UNKNOWN	SYBR	None	5.64132	5.77494	0.151261								TRUE	0.745195	TRUE	3	3	Amp		0.921632	Y	84.115	68.7698
88	H4	FALSE	8w	asb3	UNKNOWN	SYBR	None	21.5705	21.6436	0.0834459								TRUE	0.904229	TRUE	3	15	Amp		0.861452	N	82.5074
89	H5	FALSE	8w	asb3	UNKNOWN	SYBR	None	21.6258	21.6436	0.0834459								TRUE	0.904229	TRUE	3	15	Amp		0.863845	N	82.316
90	H6	FALSE	8w	asb3	UNKNOWN	SYBR	None	21.7345	21.6436	0.0834459								TRUE	0.904229	TRUE	3	15	Amp		0.869389	N	82.316

## Sheet: Melt Curve Raw Data
Block Type	96-Well 0.2-mL Block
Calibration Background is expired	No
Calibration Background performed on	08-01-2022
Calibration Pure Dye ABY is expired	No
Calibration Pure Dye ABY performed on	08-01-2022
Calibration Pure Dye CY5 is expired	No
Calibration Pure Dye CY5 performed on	08-01-2022
Calibration Pure Dye FAM is expired	No
Calibration Pure Dye FAM performed on	08-01-2022
Calibration Pure Dye JUN is expired	No
Calibration Pure Dye JUN performed on	08-01-2022
Calibration Pure Dye MUSTANG PURPLE is expired	No
Calibration Pure Dye MUSTANG PURPLE performed on	08-01-2022
Calibration Pure Dye NED is expired	No
Calibration Pure Dye NED performed on	08-01-2022
Calibration Pure Dye ROX is expired	No
Calibration Pure Dye ROX performed on	08-01-2022
Calibration Pure Dye SYBR is expired	No
Calibration Pure Dye SYBR performed on	08-01-2022
Calibration Pure Dye TAMRA is expired	No
Calibration Pure Dye TAMRA performed on	08-01-2022
Calibration Pure Dye VIC is expired	No
Calibration Pure Dye VIC performed on	08-01-2022
Calibration ROI is expired	No
Calibration ROI performed on	08-01-2022
Calibration Uniformity is expired	No
Calibration Uniformity performed on	08-01-2022
Chemistry	SYBR_GREEN
Date Created	2023-12-01 02:27:14 AM CST
Experiment Barcode
Experiment Comment
Experiment File Name	D:\datas\huang lab\qxy\2023-12-01_004614.eds
Experiment Name	2023-12-01_004614
Experiment Run End Time	2023-11-30 23:21:19 PM CST
Experiment Type	Standard Curve
Instrument Name	272520824
Instrument Serial Number	272520824
Instrument Type	QuantStudio™ 5 System
Passive Reference	ROX
Post-read Stage/Step
Pre-read Stage/Step
Quantification Cycle Method	Ct
Signal Smoothing On	true
Stage where Melt Analysis is performed	Stage3
Stage/ Cycle where Ct Analysis is performed	Stage2, Step2
User Name
Well	Well Position	Reading	Temperature	Fluorescence	Derivative	Target Name
1	A1	1	60.0006	1.4118e+06	39252.5	18s
1	A1	2	60.2926	1.40095e+06	39507.9	18s
1	A1	3	60.5846	1.39163e+06	39748.9	18s
1	A1	4	60.8766	1.38013e+06	39902.4	18s
1	A1	5	61.1686	1.36884e+06	39930.2	18s
1	A1	6	61.4606	1.35948e+06	39827.7	18s
1	A1	7	61.7526	1.34693e+06	39610	18s
1	A1	8	62.0446	1.33501e+06	39308.7	18s
1	A1	9	62.3366	1.32296e+06	38976.5	18s
1	A1	10	62.6286	1310840	38685.4	18s
1	A1	11	62.9206	1.29861e+06	38503.7	18s
1	A1	12	63.2126	1.29075e+06	38459.6	18s
1	A1	13	63.5046	1.28001e+06	38520.3	18s
1	A1	14	63.7966	1.26599e+06	38604.4	18s
1	A1	15	64.0886	1.25474e+06	38621	18s
1	A1	16	64.3806	1.24297e+06	38511.8	18s
1	A1	17	64.6726	1.23054e+06	38270.2	18s
1	A1	18	64.9646	1.22015e+06	37936.2	18s
1	A1	19	65.2566	1208622	37573	18s
1	A1	20	65.5486	1.19735e+06	37242.3	18s
1	A1	21	65.8406	1.18641e+06	36987.8	18s
1	A1	22	66.1326	1.17679e+06	36824.7	18s
1	A1	23	66.4246	1.16432e+06	36739.9	18s
1	A1	24	66.7166	1154138	36699.9	18s
1	A1	25	67.0086	1.14337e+06	36665.2	18s
1	A1	26	67.3006	1.13107e+06	36605.9	18s
1	A1	27	67.5926	1.11966e+06	36511.5	18s
1	A1	28	67.8846	1.10993e+06	36386.2	18s
1	A1	29	68.1766	1098510	36239.5	18s
1	A1	30	68.4686	1087806	36073.8	18s
1	A1	31	68.7606	1.07706e+06	35880.3	18s
1	A1	32	69.0526	1.06514e+06	35646.4	18s
1	A1	33	69.3445	1.05556e+06	35366.5	18s
1	A1	34	69.6365	1.04485e+06	35052.1	18s
1	A1	35	69.9285	1.0329e+06	34739.5	18s
1	A1	36	70.2205	1.02431e+06	34483.4	18s
1	A1	37	70.5125	1.01337e+06	34317.2	18s
1	A1	38	70.8045	1.00333e+06	34259.8	18s
1	A1	39	71.0965	994757	34286.1	18s
1	A1	40	71.3885	983425	34329.8	18s
1	A1	41	71.6805	972346	34310.5	18s
1	A1	42	71.9725	959484	34174.2	18s
1	A1	43	72.2645	950930	33920	18s
1	A1	44	72.5565	941763	33596.1	18s
1	A1	45	72.8485	932241	33266.8	18s
1	A1	46	73.1405	921789	32975.8	18s
1	A1	47	73.4325	911911	32730.2	18s
1	A1	48	73.7245	901792	32511.6	18s
1	A1	49	74.0165	891768	32296.9	18s
1	A1	50	74.3085	883371	32073.8	18s
1	A1	51	74.6005	873693	31842.3	18s
1	A1	52	74.8925	863431	31609	18s
1	A1	53	75.1845	853798	31383.4	18s
1	A1	54	75.4765	845176	31180.6	18s
1	A1	55	75.7685	836045	31021.2	18s
1	A1	56	76.0605	826381	30928.5	18s
1	A1	57	76.3525	817487	30920.2	18s
1	A1	58	76.6445	808764	31004.4	18s
1	A1	59	76.9365	798370	31180.8	18s
1	A1	60	77.2285	788438	31448.7	18s
1	A1	61	77.5205	781000	31812.5	18s
1	A1	62	77.8125	770126	32286.1	18s
1	A1	63	78.1045	759966	32891.8	18s
1	A1	64	78.3965	750749	33663.3	18s
1	A1	65	78.6885	738572	34649.1	18s
1	A1	66	78.9805	729701	35961.5	18s
1	A1	67	79.2725	719019	37639	18s
1	A1	68	79.5645	706390	39725.3	18s
1	A1	69	79.8565	694526	42237	18s
1	A1	70	80.1485	678673	45163	18s
1	A1	71	80.4405	662949	48497.4	18s
1	A1	72	80.7325	648424	52288.9	18s
1	A1	73	81.0245	632144	56683.9	18s
1	A1	74	81.3165	613149	61950.1	18s
1	A1	75	81.6085	591800	68479.6	18s
1	A1	76	81.9005	569530	76762.7	18s
1	A1	77	82.1925	545809	87307.9	18s
1	A1	78	82.4845	516134	100473	18s
1	A1	79	82.7765	483747	116205	18s
1	A1	80	83.0685	435107	133757	18s
1	A1	81	83.3605	376431	151516	18s
1	A1	82	83.6525	304923	167105	18s
1	A1	83	83.9445	232636	177814	18s
1	A1	84	84.2365	168707	181274	18s
1	A1	85	84.5285	114326	176154	18s
1	A1	86	84.8205	79767.8	162601	18s
1	A1	87	85.1125	55510.3	142253	18s
1	A1	88	85.4045	44064.7	117803	18s
1	A1	89	85.6965	37605.5	92303.8	18s
1	A1	90	85.9884	32716.9	68454.2	18s
1	A1	91	86.2805	30973.7	48108	18s
1	A1	92	86.5724	29888.3	32219.8	18s
1	A1	93	86.8644	29044.8	21015.1	18s
1	A1	94	87.1564	27969.8	13333	18s
1	A1	95	87.4484	27072.8	8343.14	18s
1	A1	96	87.7404	26175.5	5232.05	18s
1	A1	97	88.0324	27193.5	3344.3	18s
1	A1	98	88.3244	27261.5	2222.21	18s
1	A1	99	88.6164	24613.2	1577.59	18s
1	A1	100	88.9084	25669.6	1235.16	18s
1	A1	101	89.2004	25072.1	1079.62	18s
1	A1	102	89.4924	23630.5	1023.05	18s
1	A1	103	89.7844	23292.2	993.516	18s
1	A1	104	90.0764	23427.6	936.297	18s
1	A1	105	90.3684	22540.9	819.203	18s
1	A1	106	90.6604	22271.8	637.055	18s
1	A1	107	90.9524	22934.6	412.758	18s
1	A1	108	91.2444	23447	191.633	18s
1	A1	109	91.5364	23394.7	26.1055	18s
1	A1	110	91.8284	22393	-47.0312	18s
1	A1	111	92.1204	21200.4	-26.7734	18s
1	A1	112	92.4124	21420.8	48.2812	18s
1	A1	113	92.7044	20717.9	119.184	18s
1	A1	114	92.9964	21744.5	139.867	18s
1	A1	115	93.2884	22000.7	103.156	18s
1	A1	116	93.5804	21678.9	41.4141	18s
1	A1	117	93.8724	20175.2	1.32422	18s
1	A1	118	94.1644	21109.4	11.6719	18s
1	A1	119	94.4564	19813	66.9062	18s
1	A1	120	94.7484	20018.3	135.871	18s
2	A2	1	60.0006	1.59245e+06	47225.6	18s
2	A2	2	60.2926	1.58e+06	47431.7	18s
2	A2	3	60.5846	1.56719e+06	47557.3	18s
2	A2	4	60.8766	1.55491e+06	47468.2	18s
2	A2	5	61.1686	1.54001e+06	47109	18s
2	A2	6	61.4606	1.52737e+06	46518.3	18s
2	A2	7	61.7526	1.51347e+06	45806.4	18s
2	A2	8	62.0446	1.4999e+06	45112.8	18s
2	A2	9	62.3366	1.48524e+06	44562	18s
2	A2	10	62.6286	1474074	44227.2	18s
2	A2	11	62.9206	1.46156e+06	44110.1	18s
2	A2	12	63.2126	1.44934e+06	44142.2	18s
2	A2	13	63.5046	1.43486e+06	44211.3	18s
2	A2	14	63.7966	1.42127e+06	44206.4	18s
2	A2	15	64.0886	1.40795e+06	44060.2	18s
2	A2	16	64.3806	1.39291e+06	43771	18s
2	A2	17	64.6726	1.38063e+06	43393.3	18s
2	A2	18	64.9646	1.36732e+06	43006.7	18s
2	A2	19	65.2566	1.35543e+06	42676.5	18s
2	A2	20	65.5486	1.34334e+06	42431	18s
2	A2	21	65.8406	1.3306e+06	42257.9	18s
2	A2	22	66.1326	1.31615e+06	42119.7	18s
2	A2	23	66.4246	1.30461e+06	41973.1	18s
2	A2	24	66.7166	1.29183e+06	41786.4	18s
2	A2	25	67.0086	1.27945e+06	41547.5	18s
2	A2	26	67.3006	1.26487e+06	41270	18s
2	A2	27	67.5926	1.25272e+06	40985.9	18s
2	A2	28	67.8846	1.24154e+06	40730.9	18s
2	A2	29	68.1766	1229920	40526	18s
2	A2	30	68.4686	1.21678e+06	40366.3	18s
2	A2	31	68.7606	1203929	40226.3	18s
2	A2	32	69.0526	1.19233e+06	40077.8	18s
2	A2	33	69.3445	1.1802e+06	39905.9	18s
2	A2	34	69.6365	1.16722e+06	39715	18s
2	A2	35	69.9285	1.155e+06	39517.7	18s
2	A2	36	70.2205	1.1455e+06	39330.3	18s
2	A2	37	70.5125	1.13277e+06	39148.3	18s
2	A2	38	70.8045	1.11843e+06	38960.5	18s
2	A2	39	71.0965	1.10782e+06	38762.6	18s
2	A2	40	71.3885	1.09673e+06	38556.1	18s
2	A2	41	71.6805	1.08693e+06	38344.4	18s
2	A2	42	71.9725	1.07203e+06	38129.3	18s
2	A2	43	72.2645	1.06054e+06	37912.3	18s
2	A2	44	72.5565	1.05076e+06	37699	18s
2	A2	45	72.8485	1.04017e+06	37499.5	18s
2	A2	46	73.1405	1.02699e+06	37322.1	18s
2	A2	47	73.4325	1.01725e+06	37165.4	18s
2	A2	48	73.7245	1.0044e+06	37019.8	18s
2	A2	49	74.0165	994767	36870.8	18s
2	A2	50	74.3085	982970	36706.8	18s
2	A2	51	74.6005	972562	36522.7	18s
2	A2	52	74.8925	959583	36320.8	18s
2	A2	53	75.1845	950405	36111.9	18s
2	A2	54	75.4765	939701	35912.3	18s
2	A2	55	75.7685	928589	35740.4	18s
2	A2	56	76.0605	916814	35611.8	18s
2	A2	57	76.3525	907695	35537.8	18s
2	A2	58	76.6445	896009	35526.8	18s
2	A2	59	76.9365	885839	35588.8	18s
2	A2	60	77.2285	875094	35743	18s
2	A2	61	77.5205	863334	36024.5	18s
2	A2	62	77.8125	852991	36489.3	18s
2	A2	63	78.1045	842905	37208.9	18s
2	A2	64	78.3965	831435	38254.9	18s
2	A2	65	78.6885	819810	39695.5	18s
2	A2	66	78.9805	806146	41646.3	18s
2	A2	67	79.2725	792551	44071.4	18s
2	A2	68	79.5645	777466	47036	18s
2	A2	69	79.8565	763975	50650.6	18s
2	A2	70	80.1485	747056	55044.5	18s
2	A2	71	80.4405	729479	60295.7	18s
2	A2	72	80.7325	711686	66360.6	18s
2	A2	73	81.0245	686772	73072.2	18s
2	A2	74	81.3165	646799	80252.7	18s
2	A2	75	81.6085	624238	87911.9	18s
2	A2	76	81.9005	599721	96410.3	18s
2	A2	77	82.1925	571680	106439	18s
2	A2	78	82.4845	538021	118734	18s
2	A2	79	82.7765	500685	133607	18s
2	A2	80	83.0685	445346	150483	18s
2	A2	81	83.3605	378552	167679	18s
2	A2	82	83.6525	302559	182593	18s
2	A2	83	83.9445	223131	192269	18s
2	A2	84	84.2365	155574	194199	18s
2	A2	85	84.5285	99093.1	187070	18s
2	A2	86	84.8205	61927.7	171194	18s
2	A2	87	85.1125	39178.4	148456	18s
2	A2	88	85.4045	28240.8	121810	18s
2	A2	89	85.6965	21879.7	94513.5	18s
2	A2	90	85.9884	17720.3	69368.2	18s
2	A2	91	86.2805	15634.9	48224.4	18s
2	A2	92	86.5724	14335.4	32259.3	18s
2	A2	93	86.8644	13716.6	21113.4	18s
2	A2	94	87.1564	12890.6	13594.4	18s
2	A2	95	87.4484	11924.3	8795.79	18s
2	A2	96	87.7404	10616.4	5858.62	18s
2	A2	97	88.0324	11457.4	4100.74	18s
2	A2	98	88.3244	10182.1	3046.78	18s
2	A2	99	88.6164	10391.9	2399.68	18s
2	A2	100	88.9084	9028.64	1991.26	18s
2	A2	101	89.2004	9668.96	1734.54	18s
2	A2	102	89.4924	9447.38	1587.27	18s
2	A2	103	89.7844	7903.3	1526.7	18s
2	A2	104	90.0764	8925.16	1532.22	18s
2	A2	105	90.3684	6644.65	1574.75	18s
2	A2	106	90.6604	6178	1614.71	18s
2	A2	107	90.9524	6334.5	1610.53	18s
2	A2	108	91.2444	6377.81	1533.77	18s
2	A2	109	91.5364	5608.84	1381.89	18s
2	A2	110	91.8284	6213.73	1180.14	18s
2	A2	111	92.1204	5727.7	970.613	18s
2	A2	112	92.4124	6472.83	794.332	18s
2	A2	113	92.7044	5134.44	674.93	18s
2	A2	114	92.9964	5372.02	610.867	18s
2	A2	115	93.2884	4392.89	578.582	18s
2	A2	116	93.5804	5622.39	544.621	18s
2	A2	117	93.8724	5323.35	480.82	18s
2	A2	118	94.1644	4735.51	375.16	18s
2	A2	119	94.4564	4788.77	233.148	18s
2	A2	120	94.7484	5207.61	70.7461	18s
3	A3	1	60.0011	1.55658e+06	39928.8	18s
3	A3	2	60.2934	1.54552e+06	40261.9	18s
3	A3	3	60.5857	1.53312e+06	40499.4	18s
3	A3	4	60.878	1524300	40563.2	18s
3	A3	5	61.1703	1.51072e+06	40458.4	18s
3	A3	6	61.4625	1.49852e+06	40259.4	18s
3	A3	7	61.7548	1.48837e+06	40059.9	18s
3	A3	8	62.0471	1.47682e+06	39921.5	18s
3	A3	9	62.3394	1.46547e+06	39855.4	18s
3	A3	10	62.6317	1.45209e+06	39842.1	18s
3	A3	11	62.924	1.43812e+06	39859.3	18s
3	A3	12	63.2163	1429071	39898	18s
3	A3	13	63.5086	1.41583e+06	39954.9	18s
3	A3	14	63.8009	1404243	40021.5	18s
3	A3	15	64.0932	1.39148e+06	40077.6	18s
3	A3	16	64.3854	1.379e+06	40099.1	18s
3	A3	17	64.6777	1.36698e+06	40066.8	18s
3	A3	18	64.97	1.35389e+06	39971.6	18s
3	A3	19	65.2623	1.3434e+06	39818.1	18s
3	A3	20	65.5546	1.33002e+06	39620.3	18s
3	A3	21	65.8469	1.31756e+06	39402.4	18s
3	A3	22	66.1392	1.30596e+06	39191.3	18s
3	A3	23	66.4315	1.29444e+06	39007.1	18s
3	A3	24	66.7238	1.28378e+06	38858.2	18s
3	A3	25	67.0161	1.26966e+06	38741.2	18s
3	A3	26	67.3083	1.25773e+06	38648	18s
3	A3	27	67.6006	1.24665e+06	38568.2	18s
3	A3	28	67.8929	1.23588e+06	38488.2	18s
3	A3	29	68.1852	1.22294e+06	38389	18s
3	A3	30	68.4775	1.2106e+06	38251.2	18s
3	A3	31	68.7698	1.19903e+06	38071.6	18s
3	A3	32	69.0621	1.18688e+06	37871.4	18s
3	A3	33	69.3544	1.17577e+06	37691.3	18s
3	A3	34	69.6467	1.16587e+06	37571.6	18s
3	A3	35	69.9389	1.15303e+06	37525	18s
3	A3	36	70.2312	1.14257e+06	37528.5	18s
3	A3	37	70.5235	1.12984e+06	37539.6	18s
3	A3	38	70.8158	1.11771e+06	37514.1	18s
3	A3	39	71.1081	1.10734e+06	37423.5	18s
3	A3	40	71.4004	1.09513e+06	37262.4	18s
3	A3	41	71.6927	1.08403e+06	37046.6	18s
3	A3	42	71.985	1.07182e+06	36803.1	18s
3	A3	43	72.2773	1.0621e+06	36559.9	18s
3	A3	44	72.5695	1.0505e+06	36336.5	18s
3	A3	45	72.8618	1.04006e+06	36138.8	18s
3	A3	46	73.1541	1.02794e+06	35962.1	18s
3	A3	47	73.4464	1.0174e+06	35800.2	18s
3	A3	48	73.7387	1.00602e+06	35655.8	18s
3	A3	49	74.031	996260	35541.4	18s
3	A3	50	74.3233	986389	35467.4	18s
3	A3	51	74.6156	974388	35429.2	18s
3	A3	52	74.9079	962779	35402.4	18s
3	A3	53	75.2002	951764	35356.5	18s
3	A3	54	75.4924	941787	35275.1	18s
3	A3	55	75.7847	930912	35168.8	18s
3	A3	56	76.077	919998	35071.8	18s
3	A3	57	76.3693	910461	35025.3	18s
3	A3	58	76.6616	899237	35060.5	18s
3	A3	59	76.9539	887939	35194.4	18s
3	A3	60	77.2462	877026	35437.4	18s
3	A3	61	77.5385	867287	35807.9	18s
3	A3	62	77.8308	854719	36343.4	18s
3	A3	63	78.1231	845074	37101	18s
3	A3	64	78.4153	831918	38174.5	18s
3	A3	65	78.7076	821201	39642.7	18s
3	A3	66	78.9999	807113	41528.1	18s
3	A3	67	79.2922	793928	43850.1	18s
3	A3	68	79.5845	778785	46599.1	18s
3	A3	69	79.8768	761343	49751.6	18s
3	A3	70	80.1691	744302	53299.5	18s
3	A3	71	80.4614	725054	57290.4	18s
3	A3	72	80.7537	707171	61866.1	18s
3	A3	73	81.046	685765	67288.5	18s
3	A3	74	81.3382	662127	73943.8	18s
3	A3	75	81.6305	634912	82322.1	18s
3	A3	76	81.9228	605977	92959	18s
3	A3	77	82.2151	571879	106311	18s
3	A3	78	82.5074	531258	122539	18s
3	A3	79	82.7997	479378	141218	18s
3	A3	80	83.092	409440	161074	18s
3	A3	81	83.3843	327035	179911	18s
3	A3	82	83.6766	245657	194869	18s
3	A3	83	83.9688	171498	203041	18s
3	A3	84	84.2611	113063	202262	18s
3	A3	85	84.5534	71012.9	191792	18s
3	A3	86	84.8457	47795.6	172608	18s
3	A3	87	85.138	34270.4	147165	18s
3	A3	88	85.4303	27463.5	118753	18s
3	A3	89	85.7226	22486.6	90666.2	18s
3	A3	90	86.0149	20604	65513.5	18s
3	A3	91	86.3072	19738.1	44835.9	18s
3	A3	92	86.5995	18014.3	29491	18s
3	A3	93	86.8917	17668.1	18832.8	18s
3	A3	94	87.184	17585.6	11722.7	18s
3	A3	95	87.4763	16751.5	7234.39	18s
3	A3	96	87.7686	15710	4529.11	18s
3	A3	97	88.0609	16009.2	2954.73	18s
3	A3	98	88.3532	15329.1	2057.45	18s
3	A3	99	88.6455	15140.9	1547.95	18s
3	A3	100	88.9378	14735	1254.64	18s
3	A3	101	89.2301	13509	1081.71	18s
3	A3	102	89.5223	14323	977.715	18s
3	A3	103	89.8146	13754.3	914.445	18s
3	A3	104	90.1069	13235.7	873.254	18s
3	A3	105	90.3992	11609.9	836.664	18s
3	A3	106	90.6915	11972.1	785.543	18s
3	A3	107	90.9838	12736.3	703.809	18s
3	A3	108	91.2761	12682.3	588.973	18s
3	A3	109	91.5684	12145.5	460	18s
3	A3	110	91.8607	12059.4	352.285	18s
3	A3	111	92.153	10890.3	298.559	18s
3	A3	112	92.4452	10644.8	307.402	18s
3	A3	113	92.7375	10910.6	355.332	18s
3	A3	114	93.0298	10069	399.016	18s
3	A3	115	93.3221	10882	399.066	18s
3	A3	116	93.6144	10418	339.766	18s
3	A3	117	93.9067	10530.2	233.453	18s
3	A3	118	94.199	10506.8	109.945	18s
3	A3	119	94.4913	10555.5	-0.433594	18s
3	A3	120	94.7836	10611.6	-79.9492	18s
4	A4	1	60.0011	1420271	36641.6	asb3
4	A4	2	60.2934	1.4099e+06	36855.3	asb3
4	A4	3	60.5857	1.40152e+06	37059.6	asb3
4	A4	4	60.878	1.39058e+06	37184.9	asb3
4	A4	5	61.1703	1.37946e+06	37196.1	asb3
4	A4	6	61.4625	1.36908e+06	37096.6	asb3
4	A4	7	61.7548	1.35802e+06	36916.3	asb3
4	A4	8	62.0471	1.34661e+06	36695.4	asb3
4	A4	9	62.3394	1334159	36473.9	asb3
4	A4	10	62.6317	1323887	36286.6	asb3
4	A4	11	62.924	1.3126e+06	36156.5	asb3
4	A4	12	63.2163	1.30245e+06	36089.7	asb3
4	A4	13	63.5086	1.29158e+06	36076	asb3
4	A4	14	63.8009	1279245	36096.9	asb3
4	A4	15	64.0932	1.268e+06	36135	asb3
4	A4	16	64.3854	1.25821e+06	36178.5	asb3
4	A4	17	64.6777	1.24562e+06	36219.1	asb3
4	A4	18	64.97	1.23573e+06	36247.6	asb3
4	A4	19	65.2623	1.22294e+06	36251.5	asb3
4	A4	20	65.5546	1.21322e+06	36218.1	asb3
4	A4	21	65.8469	1.20175e+06	36141	asb3
4	A4	22	66.1392	1189040	36025.5	asb3
4	A4	23	66.4315	1179082	35890.3	asb3
4	A4	24	66.7238	1.16743e+06	35760.1	asb3
4	A4	25	67.0161	1.15748e+06	35656	asb3
4	A4	26	67.3083	1.14527e+06	35587.8	asb3
4	A4	27	67.6006	1134437	35551.4	asb3
4	A4	28	67.8929	1.12492e+06	35534.2	asb3
4	A4	29	68.1852	1.11148e+06	35522.2	asb3
4	A4	30	68.4775	1101032	35503.9	asb3
4	A4	31	68.7698	1.0911e+06	35467.8	asb3
4	A4	32	69.0621	1.07953e+06	35398.9	asb3
4	A4	33	69.3544	1.06917e+06	35281	asb3
4	A4	34	69.6467	1.05586e+06	35106.6	asb3
4	A4	35	69.9389	1.04628e+06	34889.1	asb3
4	A4	36	70.2312	1.03565e+06	34665.7	asb3
4	A4	37	70.5235	1.02639e+06	34484.1	asb3
4	A4	38	70.8158	1.01478e+06	34380.9	asb3
4	A4	39	71.1081	1.00454e+06	34364.4	asb3
4	A4	40	71.4004	993929	34411.3	asb3
4	A4	41	71.6927	984079	34479.8	asb3
4	A4	42	71.985	971243	34528.3	asb3
4	A4	43	72.2773	960015	34531.8	asb3
4	A4	44	72.5695	952730	34486.1	asb3
4	A4	45	72.8618	939307	34400.5	asb3
4	A4	46	73.1541	930231	34281.7	asb3
4	A4	47	73.4464	918699	34129.8	asb3
4	A4	48	73.7387	908294	33953.9	asb3
4	A4	49	74.031	898482	33761.7	asb3
4	A4	50	74.3233	887864	33569.8	asb3
4	A4	51	74.6156	878963	33397.3	asb3
4	A4	52	74.9079	867254	33254.8	asb3
4	A4	53	75.2002	857651	33139.9	asb3
4	A4	54	75.4924	846919	33039.8	asb3
4	A4	55	75.7847	837507	32939.5	asb3
4	A4	56	76.077	827281	32829.9	asb3
4	A4	57	76.3693	816942	32712.2	asb3
4	A4	58	76.6616	806585	32600.9	asb3
4	A4	59	76.9539	797249	32524.5	asb3
4	A4	60	77.2462	787815	32527.2	asb3
4	A4	61	77.5385	778377	32669.7	asb3
4	A4	62	77.8308	766842	33035.8	asb3
4	A4	63	78.1231	756675	33746.6	asb3
4	A4	64	78.4153	747558	34931.4	asb3
4	A4	65	78.7076	737275	36791.8	asb3
4	A4	66	78.9999	725180	39681.2	asb3
4	A4	67	79.2922	711013	43971	asb3
4	A4	68	79.5845	696601	50081.5	asb3
4	A4	69	79.8768	676295	58473	asb3
4	A4	70	80.1691	649934	69630.9	asb3
4	A4	71	80.4614	619843	84011.7	asb3
4	A4	72	80.7537	583588	101890	asb3
4	A4	73	81.046	537589	123068	asb3
4	A4	74	81.3382	476623	146495	asb3
4	A4	75	81.6305	386473	169961	asb3
4	A4	76	81.9228	277906	190128	asb3
4	A4	77	82.2151	170921	203108	asb3
4	A4	78	82.5074	84317.8	205536	asb3
4	A4	79	82.7997	44526.3	195778	asb3
4	A4	80	83.092	31026.8	174698	asb3
4	A4	81	83.3843	27345.6	145566	asb3
4	A4	82	83.6766	26407.9	113068	asb3
4	A4	83	83.9688	24553.1	81884.4	asb3
4	A4	84	84.2611	24958.7	55453.9	asb3
4	A4	85	84.5534	24378.8	35395.3	asb3
4	A4	86	84.8457	22941.7	20598.8	asb3
4	A4	87	85.138	24307.2	11359.2	asb3
4	A4	88	85.4303	23439.9	6155.16	asb3
4	A4	89	85.7226	22044.6	3504.76	asb3
4	A4	90	86.0149	21153.6	2298.31	asb3
4	A4	91	86.3072	20978.8	1819.82	asb3
4	A4	92	86.5995	20685.8	1660.89	asb3
4	A4	93	86.8917	19797.1	1614.27	asb3
4	A4	94	87.184	18887.3	1586.95	asb3
4	A4	95	87.4763	18209.8	1542.48	asb3
4	A4	96	87.7686	18891.1	1469.43	asb3
4	A4	97	88.0609	18081.1	1368.83	asb3
4	A4	98	88.3532	17862.2	1250.64	asb3
4	A4	99	88.6455	17133.2	1130.15	asb3
4	A4	100	88.9378	17071.3	1021.54	asb3
4	A4	101	89.2301	17160	931.883	asb3
4	A4	102	89.5223	16594.5	859.996	asb3
4	A4	103	89.8146	15752.6	800.301	asb3
4	A4	104	90.1069	16386.2	748.117	asb3
4	A4	105	90.3992	16177.2	702.688	asb3
4	A4	106	90.6915	15658	666.547	asb3
4	A4	107	90.9838	15132.1	641.973	asb3
4	A4	108	91.2761	14602.5	626.875	asb3
4	A4	109	91.5684	14845.7	613.695	asb3
4	A4	110	91.8607	15016.6	593.453	asb3
4	A4	111	92.153	14532.4	562.875	asb3
4	A4	112	92.4452	14658.7	528.191	asb3
4	A4	113	92.7375	13590.5	500.887	asb3
4	A4	114	93.0298	13057.6	487.754	asb3
4	A4	115	93.3221	14332.4	483.762	asb3
4	A4	116	93.6144	13840.5	474.547	asb3
4	A4	117	93.9067	12565.5	446.781	asb3
4	A4	118	94.199	12885.8	397.887	asb3
4	A4	119	94.4913	13770.3	337.285	asb3
4	A4	120	94.7836	14129.8	279.199	asb3
5	A5	1	60.0007	1.315e+06	35041.7	asb3
5	A5	2	60.2924	1.30719e+06	35253.6	asb3
5	A5	3	60.5841	1.29698e+06	35437.2	asb3
5	A5	4	60.8758	1.28794e+06	35531.1	asb3
5	A5	5	61.1675	1.2775e+06	35520.2	asb3
5	A5	6	61.4592	1.26756e+06	35428.3	asb3
5	A5	7	61.7509	1.25834e+06	35293.6	asb3
5	A5	8	62.0426	1.2478e+06	35147.2	asb3
5	A5	9	62.3343	1.2359e+06	35006.8	asb3
5	A5	10	62.626	1.2261e+06	34883.3	asb3
5	A5	11	62.9177	1.21535e+06	34783.3	asb3
5	A5	12	63.2094	1.20617e+06	34706.8	asb3
5	A5	13	63.5011	1.19548e+06	34646.3	asb3
5	A5	14	63.7928	1.18387e+06	34592.4	asb3
5	A5	15	64.0845	1.17516e+06	34539.9	asb3
5	A5	16	64.3763	1.16189e+06	34490.6	asb3
5	A5	17	64.668	1.15419e+06	34445.8	asb3
5	A5	18	64.9597	1.14328e+06	34397	asb3
5	A5	19	65.2514	1.13248e+06	34324.3	asb3
5	A5	20	65.5431	1.1224e+06	34207.2	asb3
5	A5	21	65.8348	1.11214e+06	34042	asb3
5	A5	22	66.1265	1.10038e+06	33851.3	asb3
5	A5	23	66.4182	1.09102e+06	33679.1	asb3
5	A5	24	66.7099	1.0806e+06	33566.5	asb3
5	A5	25	67.0016	1072075	33528.8	asb3
5	A5	26	67.2933	1.06141e+06	33546.9	asb3
5	A5	27	67.585	1.05011e+06	33577.4	asb3
5	A5	28	67.8767	1.03996e+06	33577.4	asb3
5	A5	29	68.1684	1.03075e+06	33523.9	asb3
5	A5	30	68.4601	1.01882e+06	33420.9	asb3
5	A5	31	68.7518	1.00878e+06	33288.7	asb3
5	A5	32	69.0435	1.0006e+06	33145.9	asb3
5	A5	33	69.3352	988965	32997.7	asb3
5	A5	34	69.6269	979713	32836.5	asb3
5	A5	35	69.9186	968858	32656.3	asb3
5	A5	36	70.2103	959003	32465.8	asb3
5	A5	37	70.502	949140	32292.9	asb3
5	A5	38	70.7937	939872	32170.2	asb3
5	A5	39	71.0854	930813	32113.7	asb3
5	A5	40	71.3771	920203	32106.7	asb3
5	A5	41	71.6688	911854	32103.8	asb3
5	A5	42	71.9605	899703	32053.6	asb3
5	A5	43	72.2522	889802	31930.2	asb3
5	A5	44	72.5439	881963	31750.4	asb3
5	A5	45	72.8356	870057	31536.7	asb3
5	A5	46	73.1273	862699	31326.4	asb3
5	A5	47	73.419	853652	31145.4	asb3
5	A5	48	73.7107	842662	31001.7	asb3
5	A5	49	74.0024	832935	30892.3	asb3
5	A5	50	74.2941	824723	30813.3	asb3
5	A5	51	74.5858	815345	30760.5	asb3
5	A5	52	74.8775	806995	30724.7	asb3
5	A5	53	75.1693	795909	30687.9	asb3
5	A5	54	75.461	786397	30626.7	asb3
5	A5	55	75.7527	777501	30523.5	asb3
5	A5	56	76.0444	769089	30373.7	asb3
5	A5	57	76.3361	758911	30188.7	asb3
5	A5	58	76.6278	749484	29995.3	asb3
5	A5	59	76.9195	741048	29834.3	asb3
5	A5	60	77.2112	732609	29762.4	asb3
5	A5	61	77.5029	723907	29852.7	asb3
5	A5	62	77.7946	714499	30196	asb3
5	A5	63	78.0863	705946	30906.9	asb3
5	A5	64	78.378	696727	32156.6	asb3
5	A5	65	78.6697	687921	34343.9	asb3
5	A5	66	78.9614	675861	37678.8	asb3
5	A5	67	79.2531	666154	42617.7	asb3
5	A5	68	79.5448	653182	49747.8	asb3
5	A5	69	79.8365	639616	59750.2	asb3
5	A5	70	80.1282	621123	73295.7	asb3
5	A5	71	80.4199	596003	90857.4	asb3
5	A5	72	80.7116	568973	112445	asb3
5	A5	73	81.0033	533854	137308	asb3
5	A5	74	81.295	463864	163695	asb3
5	A5	75	81.5867	406941	188803	asb3
5	A5	76	81.8784	331234	209033	asb3
5	A5	77	82.1701	235473	220635	asb3
5	A5	78	82.4618	141279	220657	asb3
5	A5	79	82.7535	71495.6	207936	asb3
5	A5	80	83.0452	33750.6	183704	asb3
5	A5	81	83.3369	22450.7	151457	asb3
5	A5	82	83.6286	20018.8	116031	asb3
5	A5	83	83.9203	18905.5	82244.3	asb3
5	A5	84	84.212	19255.8	53665.6	asb3
5	A5	85	84.5037	17902.6	32002.5	asb3
5	A5	86	84.7954	18335.6	18738.9	asb3
5	A5	87	85.0872	16926.5	10561.7	asb3
5	A5	88	85.3789	16761	6006.31	asb3
5	A5	89	85.6706	15861.4	3713.2	asb3
5	A5	90	85.9623	14630.3	2662.19	asb3
5	A5	91	86.254	14291.2	2203.36	asb3
5	A5	92	86.5457	13499.9	1978.71	asb3
5	A5	93	86.8374	13063.4	1818.83	asb3
5	A5	94	87.1291	12963.2	1659.4	asb3
5	A5	95	87.4208	11677.6	1488.36	asb3
5	A5	96	87.7125	12782.5	1317.58	asb3
5	A5	97	88.0042	11602.3	1167.64	asb3
5	A5	98	88.2959	12020.4	1057.84	asb3
5	A5	99	88.5876	11517	998.543	asb3
5	A5	100	88.8793	10469.8	987.039	asb3
5	A5	101	89.171	11011.5	1008.73	asb3
5	A5	102	89.4627	9900.54	1042.66	asb3
5	A5	103	89.7544	10110.5	1068.07	asb3
5	A5	104	90.0461	9430.87	1068.46	asb3
5	A5	105	90.3378	8807.03	1032.97	asb3
5	A5	106	90.6295	8972.23	957.094	asb3
5	A5	107	90.9212	8485.46	844.291	asb3
5	A5	108	91.2129	8827.33	707.4	asb3
5	A5	109	91.5046	8918.32	567.188	asb3
5	A5	110	91.7963	8218.88	446.795	asb3
5	A5	111	92.088	8790.22	364.102	asb3
5	A5	112	92.3797	8657.81	325.844	asb3
5	A5	113	92.6714	7736.49	326.242	asb3
5	A5	114	92.9631	8035.21	350.252	asb3
5	A5	115	93.2548	8133.61	379.197	asb3
5	A5	116	93.5465	7591.72	396.174	asb3
5	A5	117	93.8382	7167.38	389.641	asb3
5	A5	118	94.1299	6867.45	355.205	asb3
5	A5	119	94.4216	7490	296.045	asb3
5	A5	120	94.7133	8159.56	221.635	asb3
6	A6	1	60.0007	1.36577e+06	35406.5	asb3
6	A6	2	60.2924	1356206	35623.6	asb3
6	A6	3	60.5841	1.34711e+06	35813.4	asb3
6	A6	4	60.8758	1.33795e+06	35910.8	asb3
6	A6	5	61.1675	1.32657e+06	35891.7	asb3
6	A6	6	61.4592	1317992	35774.5	asb3
6	A6	7	61.7509	1.30615e+06	35599.6	asb3
6	A6	8	62.0426	1296810	35408.8	asb3
6	A6	9	62.3343	1.28543e+06	35235.5	asb3
6	A6	10	62.626	1.27469e+06	35103	asb3
6	A6	11	62.9177	1.26389e+06	35023.4	asb3
6	A6	12	63.2094	1254963	34993.4	asb3
6	A6	13	63.5011	1.2443e+06	34992.5	asb3
6	A6	14	63.7928	1.23317e+06	34993.1	asb3
6	A6	15	64.0845	1.22222e+06	34971.7	asb3
6	A6	16	64.3763	1.21171e+06	34920.7	asb3
6	A6	17	64.668	1.20065e+06	34845.6	asb3
6	A6	18	64.9597	1.1909e+06	34757.4	asb3
6	A6	19	65.2514	1.18132e+06	34665.6	asb3
6	A6	20	65.5431	1169262	34579.6	asb3
6	A6	21	65.8348	1.15905e+06	34511.1	asb3
6	A6	22	66.1265	1.14894e+06	34473.3	asb3
6	A6	23	66.4182	1.13823e+06	34472.1	asb3
6	A6	24	66.7099	1.12942e+06	34496.9	asb3
6	A6	25	67.0016	1.11755e+06	34521.6	asb3
6	A6	26	67.2933	1.10698e+06	34516.8	asb3
6	A6	27	67.585	1.09597e+06	34465.9	asb3
6	A6	28	67.8767	1.08598e+06	34373.1	asb3
6	A6	29	68.1684	1075259	34259.1	asb3
6	A6	30	68.4601	1.06507e+06	34146.3	asb3
6	A6	31	68.7518	1.05511e+06	34047.6	asb3
6	A6	32	69.0435	1.0444e+06	33960	asb3
6	A6	33	69.3352	1.03408e+06	33870.8	asb3
6	A6	34	69.6269	1.02372e+06	33766.1	asb3
6	A6	35	69.9186	1.01346e+06	33641	asb3
6	A6	36	70.2103	1.00312e+06	33503.9	asb3
6	A6	37	70.502	993330	33373.1	asb3
6	A6	38	70.7937	982583	33268.4	asb3
6	A6	39	71.0854	973923	33200.1	asb3
6	A6	40	71.3771	963251	33162.7	asb3
6	A6	41	71.6688	953334	33134.5	asb3
6	A6	42	71.9605	942404	33086.1	asb3
6	A6	43	72.2522	933035	32992.9	asb3
6	A6	44	72.5439	923331	32844.4	asb3
6	A6	45	72.8356	912273	32648.1	asb3
6	A6	46	73.1273	902496	32425.1	asb3
6	A6	47	73.419	893682	32199.9	asb3
6	A6	48	73.7107	884953	31989.3	asb3
6	A6	49	74.0024	873742	31799.5	asb3
6	A6	50	74.2941	864215	31629.8	asb3
6	A6	51	74.5858	855242	31484.3	asb3
6	A6	52	74.8775	845481	31375.9	asb3
6	A6	53	75.1693	836896	31319.6	asb3
6	A6	54	75.461	827426	31319.8	asb3
6	A6	55	75.7527	817534	31362	asb3
6	A6	56	76.0444	807820	31416.6	asb3
6	A6	57	76.3361	798495	31455.8	asb3
6	A6	58	76.6278	787819	31473	asb3
6	A6	59	76.9195	778855	31493.2	asb3
6	A6	60	77.2112	770892	31572.5	asb3
6	A6	61	77.5029	760603	31789.9	asb3
6	A6	62	77.7946	751441	32243	asb3
6	A6	63	78.0863	740537	33054.1	asb3
6	A6	64	78.378	732527	34392.6	asb3
6	A6	65	78.6697	722250	36471.8	asb3
6	A6	66	78.9614	710380	39571.8	asb3
6	A6	67	79.2531	699330	44039.4	asb3
6	A6	68	79.5448	685697	50287.6	asb3
6	A6	69	79.8365	670423	58791	asb3
6	A6	70	80.1282	649877	70064.5	asb3
6	A6	71	80.4199	625659	84594.6	asb3
6	A6	72	80.7116	597027	102675	asb3
6	A6	73	81.0033	560059	124122	asb3
6	A6	74	81.295	515899	147901	asb3
6	A6	75	81.5867	454833	171840	asb3
6	A6	76	81.8784	373317	192650	asb3
6	A6	77	82.1701	272147	206465	asb3
6	A6	78	82.4618	171671	209872	asb3
6	A6	79	82.7535	96031.3	201093	asb3
6	A6	80	83.0452	52400.4	180782	asb3
6	A6	81	83.3369	39562.4	151997	asb3
6	A6	82	83.6286	34333.6	119301	asb3
6	A6	83	83.9203	29668	87382.1	asb3
6	A6	84	84.212	28446.1	59812.7	asb3
6	A6	85	84.5037	27975.4	38415.6	asb3
6	A6	86	84.7954	26155.9	23408.1	asb3
6	A6	87	85.0872	26451.3	13769.4	asb3
6	A6	88	85.3789	26313.1	8067.82	asb3
6	A6	89	85.6706	25260	4956.17	asb3
6	A6	90	85.9623	23674.4	3386.64	asb3
6	A6	91	86.254	23491.2	2655.15	asb3
6	A6	92	86.5457	23776.3	2337.75	asb3
6	A6	93	86.8374	21779.5	2197.9	asb3
6	A6	94	87.1291	21397.7	2108.43	asb3
6	A6	95	87.4208	20503.5	2003.03	asb3
6	A6	96	87.7125	20581.7	1854.27	asb3
6	A6	97	88.0042	20414.8	1665.7	asb3
6	A6	98	88.2959	19732.8	1464.44	asb3
6	A6	99	88.5876	20351.8	1287.74	asb3
6	A6	100	88.8793	19589.6	1166.01	asb3
6	A6	101	89.171	19311.8	1109.65	asb3
6	A6	102	89.4627	18476.6	1105.57	asb3
6	A6	103	89.7544	18801.4	1123.76	asb3
6	A6	104	90.0461	17604.1	1130.13	asb3
6	A6	105	90.3378	17349.5	1099.91	asb3
6	A6	106	90.6295	17806.7	1025.96	asb3
6	A6	107	90.9212	17614.4	918.598	asb3
6	A6	108	91.2129	17359.6	797.129	asb3
6	A6	109	91.5046	17305.5	677.775	asb3
6	A6	110	91.7963	16682.7	565.779	asb3
6	A6	111	92.088	16336	457.148	asb3
6	A6	112	92.3797	17541.9	348.402	asb3
6	A6	113	92.6714	17415.8	245.891	asb3
6	A6	114	92.9631	16908	166.023	asb3
6	A6	115	93.2548	17447.7	125.355	asb3
6	A6	116	93.5465	16603.7	128.059	asb3
6	A6	117	93.8382	17282.7	160.211	asb3
6	A6	118	94.1299	16750.4	195.07	asb3
6	A6	119	94.4216	17179.7	205.531	asb3
6	A6	120	94.7133	15283.2	176.137	asb3
13	B1	1	60.0006	1.37896e+06	42825.3	18s
13	B1	2	60.2926	1.36675e+06	42878.2	18s
13	B1	3	60.5846	1.35639e+06	42915.4	18s
13	B1	4	60.8766	1.3448e+06	42834.1	18s
13	B1	5	61.1686	1.33329e+06	42575.6	18s
13	B1	6	61.4606	1.32132e+06	42141.3	18s
13	B1	7	61.7526	1.30689e+06	41582	18s
13	B1	8	62.0446	1.29484e+06	40975.2	18s
13	B1	9	62.3366	1.28409e+06	40395.6	18s
13	B1	10	62.6286	1270962	39896.9	18s
13	B1	11	62.9206	1.26127e+06	39503.9	18s
13	B1	12	63.2126	1.24717e+06	39216	18s
13	B1	13	63.5046	1.23691e+06	39012.9	18s
13	B1	14	63.7966	1.22479e+06	38863.2	18s
13	B1	15	64.0886	1.21424e+06	38729.7	18s
13	B1	16	64.3806	1.20085e+06	38575.9	18s
13	B1	17	64.6726	1.1895e+06	38373.7	18s
13	B1	18	64.9646	1178816	38111.1	18s
13	B1	19	65.2566	1.1668e+06	37799	18s
13	B1	20	65.5486	1.15561e+06	37468.6	18s
13	B1	21	65.8406	1.14238e+06	37162	18s
13	B1	22	66.1326	1.13433e+06	36913.5	18s
13	B1	23	66.4246	1.12289e+06	36733	18s
13	B1	24	66.7166	1.11224e+06	36602.5	18s
13	B1	25	67.0086	1.09873e+06	36488.1	18s
13	B1	26	67.3006	1.0886e+06	36358.1	18s
13	B1	27	67.5926	1078744	36194	18s
13	B1	28	67.8846	1.06696e+06	35993.1	18s
13	B1	29	68.1766	1.05494e+06	35762.9	18s
13	B1	30	68.4686	1.04611e+06	35518	18s
13	B1	31	68.7606	1.03354e+06	35275.3	18s
13	B1	32	69.0526	1.02441e+06	35048	18s
13	B1	33	69.3445	1.01321e+06	34839	18s
13	B1	34	69.6365	1.00335e+06	34637.4	18s
13	B1	35	69.9285	992412	34422.7	18s
13	B1	36	70.2205	982102	34177.7	18s
13	B1	37	70.5125	970700	33899.5	18s
13	B1	38	70.8045	961540	33605.1	18s
13	B1	39	71.0965	951753	33325.8	18s
13	B1	40	71.3885	941748	33094.9	18s
13	B1	41	71.6805	931415	32935.8	18s
13	B1	42	71.9725	921559	32853.9	18s
13	B1	43	72.2645	912562	32831.9	18s
13	B1	44	72.5565	902528	32831.5	18s
13	B1	45	72.8485	892462	32801.5	18s
13	B1	46	73.1405	880658	32694.2	18s
13	B1	47	73.4325	871753	32485	18s
13	B1	48	73.7245	862821	32183.4	18s
13	B1	49	74.0165	851768	31829.2	18s
13	B1	50	74.3085	843685	31475.9	18s
13	B1	51	74.6005	834208	31168.3	18s
13	B1	52	74.8925	825437	30928.7	18s
13	B1	53	75.1845	816350	30754.7	18s
13	B1	54	75.4765	804985	30632.4	18s
13	B1	55	75.7685	796769	30549.9	18s
13	B1	56	76.0605	789298	30506.9	18s
13	B1	57	76.3525	779128	30511	18s
13	B1	58	76.6445	768711	30571.9	18s
13	B1	59	76.9365	760542	30699.6	18s
13	B1	60	77.2285	751668	30909.4	18s
13	B1	61	77.5205	740896	31226.8	18s
13	B1	62	77.8125	733430	31686.6	18s
13	B1	63	78.1045	722754	32326.4	18s
13	B1	64	78.3965	713123	33180.3	18s
13	B1	65	78.6885	701852	34279.3	18s
13	B1	66	78.9805	691994	35657.6	18s
13	B1	67	79.2725	680281	37351.9	18s
13	B1	68	79.5645	669267	39401.8	18s
13	B1	69	79.8565	656256	41842.4	18s
13	B1	70	80.1485	641034	44701.4	18s
13	B1	71	80.4405	626860	48011	18s
13	B1	72	80.7325	610882	51835.9	18s
13	B1	73	81.0245	592590	56312.2	18s
13	B1	74	81.3165	574202	61683.4	18s
13	B1	75	81.6085	552759	68319	18s
13	B1	76	81.9005	530393	76685.6	18s
13	B1	77	82.1925	504975	87238.7	18s
13	B1	78	82.4845	475509	100217	18s
13	B1	79	82.7765	439023	115373	18s
13	B1	80	83.0685	388200	131728	18s
13	B1	81	83.3605	324061	147505	18s
13	B1	82	83.6525	254777	160339	18s
13	B1	83	83.9445	187357	167777	18s
13	B1	84	84.2365	127325	167934	18s
13	B1	85	84.5285	81089.1	160066	18s
13	B1	86	84.8205	51196.5	144840	18s
13	B1	87	85.1125	33988.2	124191	18s
13	B1	88	85.4045	25392.2	100814	18s
13	B1	89	85.6965	20300.4	77496	18s
13	B1	90	85.9884	17782.5	56500.7	18s
13	B1	91	86.2805	15379.2	39208.8	18s
13	B1	92	86.5724	14844.6	26074.9	18s
13	B1	93	86.8644	13958.9	16793.3	18s
13	B1	94	87.1564	12341	10638.2	18s
13	B1	95	87.4484	12717.2	6769.01	18s
13	B1	96	87.7404	12146.1	4430.96	18s
13	B1	97	88.0324	11278.6	3046.46	18s
13	B1	98	88.3244	10284.6	2220.58	18s
13	B1	99	88.6164	10134.5	1704.23	18s
13	B1	100	88.9084	10442.8	1350.79	18s
13	B1	101	89.2004	10062	1081.28	18s
13	B1	102	89.4924	8879.08	859.051	18s
13	B1	103	89.7844	9022.86	671.031	18s
13	B1	104	90.0764	9781	514.91	18s
13	B1	105	90.3684	9194.13	392.09	18s
13	B1	106	90.6604	8236.61	304.281	18s
13	B1	107	90.9524	8729.23	251.152	18s
13	B1	108	91.2444	8506.74	229.156	18s
13	B1	109	91.5364	7798.79	232.691	18s
13	B1	110	91.8284	8200.99	256.652	18s
13	B1	111	92.1204	8650.69	296.785	18s
13	B1	112	92.4124	5810.83	346.246	18s
13	B1	113	92.7044	6893.66	391.867	18s
13	B1	114	92.9964	7491.24	415.867	18s
13	B1	115	93.2884	5536.26	404.004	18s
13	B1	116	93.5804	6723.45	354.746	18s
13	B1	117	93.8724	6287.95	281.895	18s
13	B1	118	94.1644	7335.18	208.332	18s
13	B1	119	94.4564	5947.74	155.027	18s
13	B1	120	94.7484	6263.22	132.27	18s
14	B2	1	60.0006	1.48442e+06	42565.9	18s
14	B2	2	60.2926	1.47254e+06	42772	18s
14	B2	3	60.5846	1.46158e+06	42906.2	18s
14	B2	4	60.8766	1448361	42884.8	18s
14	B2	5	61.1686	1.43663e+06	42691.2	18s
14	B2	6	61.4606	1.42471e+06	42370.9	18s
14	B2	7	61.7526	1.41287e+06	41997.1	18s
14	B2	8	62.0446	1.39958e+06	41636	18s
14	B2	9	62.3366	1.38684e+06	41332.4	18s
14	B2	10	62.6286	1.37474e+06	41105	18s
14	B2	11	62.9206	1.36245e+06	40952.9	18s
14	B2	12	63.2126	1.35097e+06	40860	18s
14	B2	13	63.5046	1.33867e+06	40797.8	18s
14	B2	14	63.7966	1324196	40733.4	18s
14	B2	15	64.0886	1.31311e+06	40634.3	18s
14	B2	16	64.3806	1.30161e+06	40476.8	18s
14	B2	17	64.6726	1.28789e+06	40250.4	18s
14	B2	18	64.9646	1.27496e+06	39963.2	18s
14	B2	19	65.2566	1.26409e+06	39641.7	18s
14	B2	20	65.5486	1.25134e+06	39321.5	18s
14	B2	21	65.8406	1.24027e+06	39033.1	18s
14	B2	22	66.1326	1228220	38790	18s
14	B2	23	66.4246	1.21718e+06	38588.7	18s
14	B2	24	66.7166	1.20464e+06	38416.2	18s
14	B2	25	67.0086	1.19176e+06	38262.6	18s
14	B2	26	67.3006	1.18133e+06	38125.8	18s
14	B2	27	67.5926	1170440	38007.8	18s
14	B2	28	67.8846	1157536	37910.2	18s
14	B2	29	68.1766	1.14547e+06	37827	18s
14	B2	30	68.4686	1135668	37746.1	18s
14	B2	31	68.7606	1.12309e+06	37652.2	18s
14	B2	32	69.0526	1.11207e+06	37532.2	18s
14	B2	33	69.3445	1.09866e+06	37382.1	18s
14	B2	34	69.6365	1.08922e+06	37207.3	18s
14	B2	35	69.9285	1.07755e+06	37019.5	18s
14	B2	36	70.2205	1.06584e+06	36832	18s
14	B2	37	70.5125	1.05539e+06	36649.6	18s
14	B2	38	70.8045	1.0429e+06	36474.8	18s
14	B2	39	71.0965	1.0334e+06	36308.6	18s
14	B2	40	71.3885	1.02052e+06	36150.6	18s
14	B2	41	71.6805	1.01117e+06	35996.2	18s
14	B2	42	71.9725	1.00064e+06	35835.6	18s
14	B2	43	72.2645	987369	35657.9	18s
14	B2	44	72.5565	977533	35459.1	18s
14	B2	45	72.8485	967159	35246.5	18s
14	B2	46	73.1405	956315	35033.1	18s
14	B2	47	73.4325	946664	34825.6	18s
14	B2	48	73.7245	935235	34617.6	18s
14	B2	49	74.0165	924584	34393.5	18s
14	B2	50	74.3085	914032	34143.4	18s
14	B2	51	74.6005	903618	33876.5	18s
14	B2	52	74.8925	893901	33622.2	18s
14	B2	53	75.1845	884463	33417.2	18s
14	B2	54	75.4765	874434	33287.7	18s
14	B2	55	75.7685	863615	33239	18s
14	B2	56	76.0605	852752	33257.4	18s
14	B2	57	76.3525	844313	33322.3	18s
14	B2	58	76.6445	833551	33418.9	18s
14	B2	59	76.9365	822013	33547.2	18s
14	B2	60	77.2285	812553	33725.9	18s
14	B2	61	77.5205	802716	33990.5	18s
14	B2	62	77.8125	793525	34388.2	18s
14	B2	63	78.1045	780950	34974	18s
14	B2	64	78.3965	770520	35806.6	18s
14	B2	65	78.6885	759899	36948.6	18s
14	B2	66	78.9805	748912	38475.3	18s
14	B2	67	79.2725	736684	40416	18s
14	B2	68	79.5645	723995	42777.3	18s
14	B2	69	79.8565	707268	45533.8	18s
14	B2	70	80.1485	692212	48653.2	18s
14	B2	71	80.4405	675689	52141.6	18s
14	B2	72	80.7325	658884	56090.2	18s
14	B2	73	81.0245	640413	60704.9	18s
14	B2	74	81.3165	618617	66314.5	18s
14	B2	75	81.6085	597468	73356.1	18s
14	B2	76	81.9005	573255	82325.3	18s
14	B2	77	82.1925	543060	93665.7	18s
14	B2	78	82.4845	511818	107576	18s
14	B2	79	82.7765	471685	123756	18s
14	B2	80	83.0685	417880	141170	18s
14	B2	81	83.3605	349339	157970	18s
14	B2	82	83.6525	274500	171695	18s
14	B2	83	83.9445	200215	179770	18s
14	B2	84	84.2365	136373	180178	18s
14	B2	85	84.5285	85079.5	172075	18s
14	B2	86	84.8205	51802.8	156099	18s
14	B2	87	85.1125	31807.7	134245	18s
14	B2	88	85.4045	22483.7	109351	18s
14	B2	89	85.6965	17445.7	84390.8	18s
14	B2	90	85.9884	13618.5	61813.3	18s
14	B2	91	86.2805	11448.6	43137.7	18s
14	B2	92	86.5724	9645.69	28966.3	18s
14	B2	93	86.8644	9220.96	18934.8	18s
14	B2	94	87.1564	7611.66	12218.5	18s
14	B2	95	87.4484	7856.46	7927.52	18s
14	B2	96	87.7404	6942.9	5266.31	18s
14	B2	97	88.0324	7069.34	3634.05	18s
14	B2	98	88.3244	5223.31	2627.9	18s
14	B2	99	88.6164	6367.97	1998.66	18s
14	B2	100	88.9084	5853.6	1598.72	18s
14	B2	101	89.2004	5066.61	1340.83	18s
14	B2	102	89.4924	4353.28	1171.17	18s
14	B2	103	89.7844	4578.4	1053.96	18s
14	B2	104	90.0764	4735.3	964.574	18s
14	B2	105	90.3684	3952.07	887.094	18s
14	B2	106	90.6604	3325.02	812.207	18s
14	B2	107	90.9524	4293.81	733.805	18s
14	B2	108	91.2444	2633.21	646.879	18s
14	B2	109	91.5364	3187.98	549.633	18s
14	B2	110	91.8284	3607.31	448.656	18s
14	B2	111	92.1204	4158.02	361.34	18s
14	B2	112	92.4124	2903.95	310.203	18s
14	B2	113	92.7044	2597.27	310.477	18s
14	B2	114	92.9964	2725.6	359.094	18s
14	B2	115	93.2884	2139.14	433.898	18s
14	B2	116	93.5804	1980.68	504.469	18s
14	B2	117	93.8724	2410.47	547.152	18s
14	B2	118	94.1644	1204.7	554.598	18s
14	B2	119	94.4564	2352.04	535.117	18s
14	B2	120	94.7484	2079.38	504.672	18s
15	B3	1	60.0011	1.43283e+06	38667.8	18s
15	B3	2	60.2934	1.42366e+06	38880.4	18s
15	B3	3	60.5857	1.41275e+06	39051.4	18s
15	B3	4	60.878	1.40206e+06	39094.8	18s
15	B3	5	61.1703	1.39169e+06	38981.1	18s
15	B3	6	61.4625	1378445	38742.3	18s
15	B3	7	61.7548	1.36857e+06	38448.7	18s
15	B3	8	62.0471	1.35642e+06	38170.3	18s
15	B3	9	62.3394	1.34525e+06	37953	18s
15	B3	10	62.6317	1.33478e+06	37809	18s
15	B3	11	62.924	1.32157e+06	37724.3	18s
15	B3	12	63.2163	1.31214e+06	37672.6	18s
15	B3	13	63.5086	1.2991e+06	37625.8	18s
15	B3	14	63.8009	1.28867e+06	37564.7	18s
15	B3	15	64.0932	1.27685e+06	37486.4	18s
15	B3	16	64.3854	1264994	37401	18s
15	B3	17	64.6777	1252246	37325.8	18s
15	B3	18	64.97	1.24422e+06	37268	18s
15	B3	19	65.2623	1232027	37218.3	18s
15	B3	20	65.5546	1.21954e+06	37154.3	18s
15	B3	21	65.8469	1.20844e+06	37055.7	18s
15	B3	22	66.1392	1196738	36916.8	18s
15	B3	23	66.4315	1.18639e+06	36748.5	18s
15	B3	24	66.7238	1.17479e+06	36569.6	18s
15	B3	25	67.0161	1.16334e+06	36395.8	18s
15	B3	26	67.3083	1.15262e+06	36235.5	18s
15	B3	27	67.6006	1.1411e+06	36091.5	18s
15	B3	28	67.8929	1.13049e+06	35964.3	18s
15	B3	29	68.1852	1.11909e+06	35855.5	18s
15	B3	30	68.4775	1.10838e+06	35765.7	18s
15	B3	31	68.7698	1.09789e+06	35691.5	18s
15	B3	32	69.0621	1.08608e+06	35625.6	18s
15	B3	33	69.3544	1.07601e+06	35557.4	18s
15	B3	34	69.6467	1.0645e+06	35475.6	18s
15	B3	35	69.9389	1.05374e+06	35370.4	18s
15	B3	36	70.2312	1.04355e+06	35234.4	18s
15	B3	37	70.5235	1032379	35066.2	18s
15	B3	38	70.8158	1.02099e+06	34873.3	18s
15	B3	39	71.1081	1.01135e+06	34671.5	18s
15	B3	40	71.4004	1.00016e+06	34485.3	18s
15	B3	41	71.6927	989944	34336.2	18s
15	B3	42	71.985	981796	34232.6	18s
15	B3	43	72.2773	968280	34163.1	18s
15	B3	44	72.5695	958524	34101.5	18s
15	B3	45	72.8618	948753	34018.4	18s
15	B3	46	73.1541	938322	33893.3	18s
15	B3	47	73.4464	927104	33719.1	18s
15	B3	48	73.7387	918431	33503.2	18s
15	B3	49	74.031	906762	33263.7	18s
15	B3	50	74.3233	897532	33026.9	18s
15	B3	51	74.6156	888204	32821.7	18s
15	B3	52	74.9079	878600	32669.8	18s
15	B3	53	75.2002	867663	32576.6	18s
15	B3	54	75.4924	858132	32529.1	18s
15	B3	55	75.7847	848356	32503.8	18s
15	B3	56	76.077	838512	32482.8	18s
15	B3	57	76.3693	826971	32468.4	18s
15	B3	58	76.6616	818934	32490.4	18s
15	B3	59	76.9539	810176	32600.4	18s
15	B3	60	77.2462	798899	32856.1	18s
15	B3	61	77.5385	789034	33305.8	18s
15	B3	62	77.8308	778478	33980.9	18s
15	B3	63	78.1231	768137	34900.9	18s
15	B3	64	78.4153	756142	36077.6	18s
15	B3	65	78.7076	745676	37537.3	18s
15	B3	66	78.9999	732230	39315.5	18s
15	B3	67	79.2922	719774	41438.9	18s
15	B3	68	79.5845	705935	43920.5	18s
15	B3	69	79.8768	689407	46763	18s
15	B3	70	80.1691	671855	49978.5	18s
15	B3	71	80.4614	655318	53625.6	18s
15	B3	72	80.7537	636623	57849.9	18s
15	B3	73	81.046	617141	62910.6	18s
15	B3	74	81.3382	595152	69181.4	18s
15	B3	75	81.6305	568522	77115	18s
15	B3	76	81.9228	538635	87167.1	18s
15	B3	77	82.2151	505876	99661.4	18s
15	B3	78	82.5074	466368	114584	18s
15	B3	79	82.7997	413406	131337	18s
15	B3	80	83.092	344124	148543	18s
15	B3	81	83.3843	264568	164060	18s
15	B3	82	83.6766	191454	175303	18s
15	B3	83	83.9688	127533	179859	18s
15	B3	84	84.2611	78272	176190	18s
15	B3	85	84.5534	45807.6	164146	18s
15	B3	86	84.8457	27650.2	145079	18s
15	B3	87	85.138	18086.5	121484	18s
15	B3	88	85.4303	14215.1	96346.3	18s
15	B3	89	85.7226	11210.4	72428	18s
15	B3	90	86.0149	9397.88	51728.6	18s
15	B3	91	86.3072	7860.94	35257.2	18s
15	B3	92	86.5995	6841.71	22991.4	18s
15	B3	93	86.8917	7087.13	14552	18s
15	B3	94	87.184	6465.76	9095.84	18s
15	B3	95	87.4763	6465.19	5759.7	18s
15	B3	96	87.7686	5212.58	3819.67	18s
15	B3	97	88.0609	3610.63	2737.88	18s
15	B3	98	88.3532	3902.12	2141.89	18s
15	B3	99	88.6455	3933.59	1786.58	18s
15	B3	100	88.9378	4010.35	1524.85	18s
15	B3	101	89.2301	3718.66	1287.02	18s
15	B3	102	89.5223	2854.94	1058.08	18s
15	B3	103	89.8146	2808.25	850.062	18s
15	B3	104	90.1069	3348.95	678.156	18s
15	B3	105	90.3992	3360.71	550.129	18s
15	B3	106	90.6915	2502.6	468.176	18s
15	B3	107	90.9838	2860.2	433.551	18s
15	B3	108	91.2761	2067.98	445.82	18s
15	B3	109	91.5684	1685.79	497.527	18s
15	B3	110	91.8607	1735.49	571.086	18s
15	B3	111	92.153	1139.73	642.414	18s
15	B3	112	92.4452	911.111	689.402	18s
15	B3	113	92.7375	1419.85	699.578	18s
15	B3	114	93.0298	237.744	672.836	18s
15	B3	115	93.3221	757.11	618.949	18s
15	B3	116	93.6144	818.428	552.434	18s
15	B3	117	93.9067	503.877	487.699	18s
15	B3	118	94.199	783.926	435.797	18s
15	B3	119	94.4913	566.308	402.836	18s
15	B3	120	94.7836	356.896	389.414	18s
16	B4	1	60.0011	1.41959e+06	37482.7	asb3
16	B4	2	60.2934	1.40761e+06	37630.4	asb3
16	B4	3	60.5857	1.39895e+06	37780.7	asb3
16	B4	4	60.878	1388776	37859.4	asb3
16	B4	5	61.1703	1.37825e+06	37818.3	asb3
16	B4	6	61.4625	1.36715e+06	37644.9	asb3
16	B4	7	61.7548	1354934	37362.1	asb3
16	B4	8	62.0471	1.34274e+06	37018.1	asb3
16	B4	9	62.3394	1.33262e+06	36674	asb3
16	B4	10	62.6317	1.32046e+06	36385.3	asb3
16	B4	11	62.924	1.30981e+06	36185.8	asb3
16	B4	12	63.2163	1.30077e+06	36077.6	asb3
16	B4	13	63.5086	1.28864e+06	36036.5	asb3
16	B4	14	63.8009	1.27674e+06	36028.3	asb3
16	B4	15	64.0932	1.26601e+06	36027.6	asb3
16	B4	16	64.3854	1.25521e+06	36026.5	asb3
16	B4	17	64.6777	1.24361e+06	36031.2	asb3
16	B4	18	64.97	1.23264e+06	36047.7	asb3
16	B4	19	65.2623	1.22254e+06	36072.6	asb3
16	B4	20	65.5546	1.21072e+06	36091.1	asb3
16	B4	21	65.8469	1.20032e+06	36087.4	asb3
16	B4	22	66.1392	1.18739e+06	36058.5	asb3
16	B4	23	66.4315	1.17718e+06	36018.2	asb3
16	B4	24	66.7238	1165646	35990.1	asb3
16	B4	25	67.0161	1.15559e+06	35989.6	asb3
16	B4	26	67.3083	1.14442e+06	36009.2	asb3
16	B4	27	67.6006	1.13307e+06	36020.3	asb3
16	B4	28	67.8929	1.1208e+06	35990	asb3
16	B4	29	68.1852	1109055	35900.7	asb3
16	B4	30	68.4775	1.09939e+06	35761	asb3
16	B4	31	68.7698	1.08729e+06	35598.8	asb3
16	B4	32	69.0621	1.07818e+06	35447.2	asb3
16	B4	33	69.3544	1.06504e+06	35330.9	asb3
16	B4	34	69.6467	1.05572e+06	35259.9	asb3
16	B4	35	69.9389	1.04457e+06	35230.3	asb3
16	B4	36	70.2312	1.03437e+06	35225.9	asb3
16	B4	37	70.5235	1.02265e+06	35222.2	asb3
16	B4	38	70.8158	1.01159e+06	35194.5	asb3
16	B4	39	71.1081	1.00067e+06	35127.2	asb3
16	B4	40	71.4004	990175	35021.6	asb3
16	B4	41	71.6927	978468	34887.3	asb3
16	B4	42	71.985	969275	34757.3	asb3
16	B4	43	72.2773	958607	34659	asb3
16	B4	44	72.5695	947250	34599.7	asb3
16	B4	45	72.8618	937004	34569.1	asb3
16	B4	46	73.1541	925628	34544.4	asb3
16	B4	47	73.4464	916311	34499.4	asb3
16	B4	48	73.7387	904494	34412.5	asb3
16	B4	49	74.031	894688	34271.6	asb3
16	B4	50	74.3233	883065	34077.8	asb3
16	B4	51	74.6156	873722	33846.5	asb3
16	B4	52	74.9079	863716	33603.8	asb3
16	B4	53	75.2002	853100	33379.2	asb3
16	B4	54	75.4924	842847	33194.8	asb3
16	B4	55	75.7847	833621	33058.7	asb3
16	B4	56	76.077	823240	32962	asb3
16	B4	57	76.3693	812121	32886.7	asb3
16	B4	58	76.6616	803126	32817.2	asb3
16	B4	59	76.9539	792037	32755.4	asb3
16	B4	60	77.2462	783097	32735.3	asb3
16	B4	61	77.5385	772641	32830	asb3
16	B4	62	77.8308	763737	33154.2	asb3
16	B4	63	78.1231	753602	33863.4	asb3
16	B4	64	78.4153	742379	35142.8	asb3
16	B4	65	78.7076	732187	37089	asb3
16	B4	66	78.9999	720426	40088.2	asb3
16	B4	67	79.2922	707000	44494.6	asb3
16	B4	68	79.5845	690789	50728.6	asb3
16	B4	69	79.8768	670612	59270.3	asb3
16	B4	70	80.1691	644315	70633	asb3
16	B4	71	80.4614	614772	85285.8	asb3
16	B4	72	80.7537	576156	103478	asb3
16	B4	73	81.046	528960	124935	asb3
16	B4	74	81.3382	464383	148490	asb3
16	B4	75	81.6305	373194	171814	asb3
16	B4	76	81.9228	261906	191511	asb3
16	B4	77	82.2151	156540	203737	asb3
16	B4	78	82.5074	75610.4	205278	asb3
16	B4	79	82.7997	33288.4	194707	asb3
16	B4	80	83.092	20107.4	173068	asb3
16	B4	81	83.3843	17229.9	143717	asb3
16	B4	82	83.6766	17244.9	111323	asb3
16	B4	83	83.9688	15484.7	80471.4	asb3
16	B4	84	84.2611	15092.5	54484.4	asb3
16	B4	85	84.5534	14985.5	34874.2	asb3
16	B4	86	84.8457	14126.4	20282.3	asb3
16	B4	87	85.138	13484.6	11299	asb3
16	B4	88	85.4303	13144.1	6276.62	asb3
16	B4	89	85.7226	11322.9	3718.4	asb3
16	B4	90	86.0149	11704.4	2528.41	asb3
16	B4	91	86.3072	11994.5	2030.49	asb3
16	B4	92	86.5995	10527.5	1865.68	asb3
16	B4	93	86.8917	9653.48	1860.53	asb3
16	B4	94	87.184	6799.96	1921.2	asb3
16	B4	95	87.4763	8114.71	1976.63	asb3
16	B4	96	87.7686	7825.47	1968.16	asb3
16	B4	97	88.0609	7367.87	1863.91	asb3
16	B4	98	88.3532	6480.14	1670.27	asb3
16	B4	99	88.6455	6883.74	1424.63	asb3
16	B4	100	88.9378	6443.84	1173.62	asb3
16	B4	101	89.2301	6199.51	953.086	asb3
16	B4	102	89.5223	6349.06	781.102	asb3
16	B4	103	89.8146	6218.57	662.395	asb3
16	B4	104	90.1069	5774.77	594.512	asb3
16	B4	105	90.3992	5123.97	569.355	asb3
16	B4	106	90.6915	4985.75	571.605	asb3
16	B4	107	90.9838	4925.69	579.789	asb3
16	B4	108	91.2761	4452.96	572.91	asb3
16	B4	109	91.5684	5540.72	539.527	asb3
16	B4	110	91.8607	4153.97	482.43	asb3
16	B4	111	92.153	4691.93	414.891	asb3
16	B4	112	92.4452	3432.5	351.207	asb3
16	B4	113	92.7375	4534.05	299.105	asb3
16	B4	114	93.0298	4949	259.797	asb3
16	B4	115	93.3221	3946.15	233.758	asb3
16	B4	116	93.6144	3628.15	224.742	asb3
16	B4	117	93.9067	4024.16	236.531	asb3
16	B4	118	94.199	3844.68	265.602	asb3
16	B4	119	94.4913	3521.82	298.078	asb3
16	B4	120	94.7836	2769.07	315.828	asb3
17	B5	1	60.0007	1.41807e+06	37797.6	asb3
17	B5	2	60.2924	1.40633e+06	37930.8	asb3
17	B5	3	60.5841	1.39865e+06	38026	asb3
17	B5	4	60.8758	1.38699e+06	38006.5	asb3
17	B5	5	61.1675	1.37648e+06	37845.9	asb3
17	B5	6	61.4592	1.36583e+06	37575.9	asb3
17	B5	7	61.7509	1.35352e+06	37261.3	asb3
17	B5	8	62.0426	1.34274e+06	36966.8	asb3
17	B5	9	62.3343	1.33353e+06	36729.9	asb3
17	B5	10	62.626	1.32141e+06	36555.3	asb3
17	B5	11	62.9177	1.30993e+06	36423.6	asb3
17	B5	12	63.2094	1.29974e+06	36310.4	asb3
17	B5	13	63.5011	1.28885e+06	36200.5	asb3
17	B5	14	63.7928	1.27721e+06	36096.8	asb3
17	B5	15	64.0845	1.26542e+06	36015.9	asb3
17	B5	16	64.3763	1.25607e+06	35976.3	asb3
17	B5	17	64.668	1244457	35982.4	asb3
17	B5	18	64.9597	1.2346e+06	36017.4	asb3
17	B5	19	65.2514	1.22316e+06	36048.2	asb3
17	B5	20	65.5431	1.21217e+06	36041.8	asb3
17	B5	21	65.8348	1200561	35981.1	asb3
17	B5	22	66.1265	1.1892e+06	35872.9	asb3
17	B5	23	66.4182	1178900	35739.6	asb3
17	B5	24	66.7099	1.16861e+06	35608.6	asb3
17	B5	25	67.0016	1.15699e+06	35500.7	asb3
17	B5	26	67.2933	1.14601e+06	35427.8	asb3
17	B5	27	67.585	1136326	35393.8	asb3
17	B5	28	67.8767	1.12396e+06	35396.2	asb3
17	B5	29	68.1684	1.11494e+06	35424.8	asb3
17	B5	30	68.4601	1.10366e+06	35463.9	asb3
17	B5	31	68.7518	1.09176e+06	35493.6	asb3
17	B5	32	69.0435	1.0817e+06	35497.4	asb3
17	B5	33	69.3352	1070628	35464.8	asb3
17	B5	34	69.6269	1.05927e+06	35393.7	asb3
17	B5	35	69.9186	1.04903e+06	35287.3	asb3
17	B5	36	70.2103	1.03876e+06	35153.2	asb3
17	B5	37	70.502	1.0268e+06	35002.5	asb3
17	B5	38	70.7937	1.01647e+06	34849.1	asb3
17	B5	39	71.0854	1.00683e+06	34706.9	asb3
17	B5	40	71.3771	996153	34579.3	asb3
17	B5	41	71.6688	985150	34463.7	asb3
17	B5	42	71.9605	975084	34351.1	asb3
17	B5	43	72.2522	964758	34226.6	asb3
17	B5	44	72.5439	954004	34082.3	asb3
17	B5	45	72.8356	943449	33926.1	asb3
17	B5	46	73.1273	933409	33777.9	asb3
17	B5	47	73.419	923415	33658.3	asb3
17	B5	48	73.7107	914468	33573	asb3
17	B5	49	74.0024	903386	33506.3	asb3
17	B5	50	74.2941	892975	33427.7	asb3
17	B5	51	74.5858	882036	33309.2	asb3
17	B5	52	74.8775	872412	33142.2	asb3
17	B5	53	75.1693	863449	32940.2	asb3
17	B5	54	75.461	852601	32730.8	asb3
17	B5	55	75.7527	843108	32540.9	asb3
17	B5	56	76.0444	833650	32388.8	asb3
17	B5	57	76.3361	822786	32285	asb3
17	B5	58	76.6278	814399	32236.4	asb3
17	B5	59	76.9195	804820	32252.3	asb3
17	B5	60	77.2112	793803	32350.8	asb3
17	B5	61	77.5029	784989	32569.1	asb3
17	B5	62	77.7946	775391	32979.2	asb3
17	B5	63	78.0863	765258	33708.7	asb3
17	B5	64	78.378	754324	34939.3	asb3
17	B5	65	78.6697	745143	36865	asb3
17	B5	66	78.9614	735892	39885	asb3
17	B5	67	79.2531	723033	44391.8	asb3
17	B5	68	79.5448	710016	50813.9	asb3
17	B5	69	79.8365	692307	59607.6	asb3
17	B5	70	80.1282	671141	71246.7	asb3
17	B5	71	80.4199	645823	86166	asb3
17	B5	72	80.7116	614082	104603	asb3
17	B5	73	81.0033	574887	126301	asb3
17	B5	74	81.295	527911	150132	asb3
17	B5	75	81.5867	459832	173821	asb3
17	B5	76	81.8784	369986	194004	asb3
17	B5	77	82.1701	262220	206825	asb3
17	B5	78	82.4618	157949	208993	asb3
17	B5	79	82.7535	79958.1	198947	asb3
17	B5	80	83.0452	36420.3	177584	asb3
17	B5	81	83.3369	24418.2	148158	asb3
17	B5	82	83.6286	21330.2	115325	asb3
17	B5	83	83.9203	20252.3	83747.8	asb3
17	B5	84	84.212	18303.3	56884.9	asb3
17	B5	85	84.5037	18002.8	36398.8	asb3
17	B5	86	84.7954	17314.4	21429	asb3
17	B5	87	85.0872	17906.6	11988.5	asb3
17	B5	88	85.3789	16479	6616.71	asb3
17	B5	89	85.6706	15765	3847.67	asb3
17	B5	90	85.9623	16590.3	2580.06	asb3
17	B5	91	86.254	15211.5	2096.85	asb3
17	B5	92	86.5457	13395.2	1974.64	asb3
17	B5	93	86.8374	13369	1978.77	asb3
17	B5	94	87.1291	12680.7	1988.62	asb3
17	B5	95	87.4208	12760.7	1954.53	asb3
17	B5	96	87.7125	11748.9	1870.65	asb3
17	B5	97	88.0042	11151.6	1752.62	asb3
17	B5	98	88.2959	10920.6	1620	asb3
17	B5	99	88.5876	10558.6	1487.55	asb3
17	B5	100	88.8793	10274.9	1365.11	asb3
17	B5	101	89.171	9869.75	1260.63	asb3
17	B5	102	89.4627	10044.3	1181.05	asb3
17	B5	103	89.7544	8725.62	1130.11	asb3
17	B5	104	90.0461	9670.9	1105.34	asb3
17	B5	105	90.3378	8116.64	1097.23	asb3
17	B5	106	90.6295	8203.69	1091.22	asb3
17	B5	107	90.9212	7912.11	1071.63	asb3
17	B5	108	91.2129	7671.25	1026.15	asb3
17	B5	109	91.5046	6963.77	949.516	asb3
17	B5	110	91.7963	7203.1	845.594	asb3
17	B5	111	92.088	7257.34	727.129	asb3
17	B5	112	92.3797	6987.72	612.363	asb3
17	B5	113	92.6714	7509.62	518.539	asb3
17	B5	114	92.9631	6119.46	454.773	asb3
17	B5	115	93.2548	6769.68	417.965	asb3
17	B5	116	93.5465	6519.93	394.742	asb3
17	B5	117	93.8382	6440.22	368.305	asb3
17	B5	118	94.1299	5691.35	326.008	asb3
17	B5	119	94.4216	6331.4	263.574	asb3
17	B5	120	94.7133	6523.42	184.613	asb3
18	B6	1	60.0007	1.36077e+06	35363.7	asb3
18	B6	2	60.2924	1.35233e+06	35589	asb3
18	B6	3	60.5841	1.34341e+06	35788.4	asb3
18	B6	4	60.8758	1.33272e+06	35879.3	asb3
18	B6	5	61.1675	1.32223e+06	35822.4	asb3
18	B6	6	61.4592	1.3135e+06	35630.3	asb3
18	B6	7	61.7509	1301156	35353	asb3
18	B6	8	62.0426	1.29221e+06	35057.6	asb3
18	B6	9	62.3343	1.27941e+06	34811.3	asb3
18	B6	10	62.626	1.26995e+06	34662.2	asb3
18	B6	11	62.9177	1.26056e+06	34624.4	asb3
18	B6	12	63.2094	1.25014e+06	34669.3	asb3
18	B6	13	63.5011	1.2403e+06	34735.5	asb3
18	B6	14	63.7928	1228335	34757.3	asb3
18	B6	15	64.0845	1217916	34698.9	asb3
18	B6	16	64.3763	1.20627e+06	34572.1	asb3
18	B6	17	64.668	1.19532e+06	34429.5	asb3
18	B6	18	64.9597	1.18698e+06	34332.9	asb3
18	B6	19	65.2514	1.17535e+06	34319.6	asb3
18	B6	20	65.5431	1.16605e+06	34382.1	asb3
18	B6	21	65.8348	1.15622e+06	34475.5	asb3
18	B6	22	66.1265	1.14417e+06	34544.3	asb3
18	B6	23	66.4182	1.13356e+06	34553.8	asb3
18	B6	24	66.7099	1.1221e+06	34504.5	asb3
18	B6	25	67.0016	1.11215e+06	34424.4	asb3
18	B6	26	67.2933	1.10212e+06	34344	asb3
18	B6	27	67.585	1.09197e+06	34275.1	asb3
18	B6	28	67.8767	1.08113e+06	34204.3	asb3
18	B6	29	68.1684	1.06945e+06	34106.5	asb3
18	B6	30	68.4601	1.0603e+06	33964.8	asb3
18	B6	31	68.7518	1048892	33784.2	asb3
18	B6	32	69.0435	1.03801e+06	33592.1	asb3
18	B6	33	69.3352	1.02923e+06	33426.1	asb3
18	B6	34	69.6269	1.01832e+06	33315.7	asb3
18	B6	35	69.9186	1.00859e+06	33269.1	asb3
18	B6	36	70.2103	999104	33271.8	asb3
18	B6	37	70.502	987852	33295.6	asb3
18	B6	38	70.7937	976989	33313.2	asb3
18	B6	39	71.0854	968198	33308.2	asb3
18	B6	40	71.3771	956947	33273.6	asb3
18	B6	41	71.6688	946798	33205.8	asb3
18	B6	42	71.9605	937822	33098.9	asb3
18	B6	43	72.2522	926331	32939.9	asb3
18	B6	44	72.5439	916150	32722.9	asb3
18	B6	45	72.8356	906499	32456	asb3
18	B6	46	73.1273	896398	32163.2	asb3
18	B6	47	73.419	886957	31876.5	asb3
18	B6	48	73.7107	878619	31624.7	asb3
18	B6	49	74.0024	867475	31426.9	asb3
18	B6	50	74.2941	858288	31292	asb3
18	B6	51	74.5858	848234	31221.3	asb3
18	B6	52	74.8775	841157	31207	asb3
18	B6	53	75.1693	830085	31227.4	asb3
18	B6	54	75.461	820158	31245.5	asb3
18	B6	55	75.7527	810229	31219.9	asb3
18	B6	56	76.0444	801173	31121.7	asb3
18	B6	57	76.3361	790777	30950.2	asb3
18	B6	58	76.6278	782148	30739.1	asb3
18	B6	59	76.9195	772071	30548.9	asb3
18	B6	60	77.2112	764768	30453.5	asb3
18	B6	61	77.5029	755531	30529.2	asb3
18	B6	62	77.7946	745289	30856.3	asb3
18	B6	63	78.0863	736449	31535.8	asb3
18	B6	64	78.378	726272	32714.1	asb3
18	B6	65	78.6697	718676	34647.9	asb3
18	B6	66	78.9614	706378	37631.9	asb3
18	B6	67	79.2531	696723	42028.1	asb3
18	B6	68	79.5448	683157	48285.4	asb3
18	B6	69	79.8365	668455	56915.4	asb3
18	B6	70	80.1282	649604	68472.7	asb3
18	B6	71	80.4199	626270	83489.7	asb3
18	B6	72	80.7116	596667	102320	asb3
18	B6	73	81.0033	561964	124849	asb3
18	B6	74	81.295	517187	150114	asb3
18	B6	75	81.5867	458112	175965	asb3
18	B6	76	81.8784	376113	199030	asb3
18	B6	77	82.1701	274336	215199	asb3
18	B6	78	82.4618	171068	220659	asb3
18	B6	79	82.7535	86791	213156	asb3
18	B6	80	83.0452	36207.3	192964	asb3
18	B6	81	83.3369	18156.6	163027	asb3
18	B6	82	83.6286	16292.7	128146	asb3
18	B6	83	83.9203	15921.5	93526.6	asb3
18	B6	84	84.212	14848.4	63341.1	asb3
18	B6	85	84.5037	13110.4	39869.7	asb3
18	B6	86	84.7954	12209.5	23743.9	asb3
18	B6	87	85.0872	10556.1	13649.1	asb3
18	B6	88	85.3789	10322	7801.07	asb3
18	B6	89	85.6706	9350.53	4662.48	asb3
18	B6	90	85.9623	8818.69	3066.56	asb3
18	B6	91	86.254	8345.49	2271.99	asb3
18	B6	92	86.5457	7529.77	1867.64	asb3
18	B6	93	86.8374	7199.01	1643.26	asb3
18	B6	94	87.1291	5698.84	1490.88	asb3
18	B6	95	87.4208	6196.66	1351.99	asb3
18	B6	96	87.7125	5760.23	1197.41	asb3
18	B6	97	88.0042	4297.44	1021.27	asb3
18	B6	98	88.2959	5855.57	836.449	asb3
18	B6	99	88.5876	4573.51	666.818	asb3
18	B6	100	88.8793	4586.25	536.4	asb3
18	B6	101	89.171	4981.61	458.131	asb3
18	B6	102	89.4627	4331.25	426.074	asb3
18	B6	103	89.7544	2689.94	415.516	asb3
18	B6	104	90.0461	3631.86	392.902	asb3
18	B6	105	90.3378	3116.56	332.176	asb3
18	B6	106	90.6295	3380.66	228.996	asb3
18	B6	107	90.9212	3111.96	104.473	asb3
18	B6	108	91.2129	3722.65	-3.95312	asb3
18	B6	109	91.5046	3306.23	-59.3906	asb3
18	B6	110	91.7963	2855.24	-41.4102	asb3
18	B6	111	92.088	3301.77	45.6133	asb3
18	B6	112	92.3797	2009.54	173.926	asb3
18	B6	113	92.6714	1757.32	302.375	asb3
18	B6	114	92.9631	1077.8	391.492	asb3
18	B6	115	93.2548	1793.36	418.449	asb3
18	B6	116	93.5465	1063.37	385.516	asb3
18	B6	117	93.8382	1659.5	317.227	asb3
18	B6	118	94.1299	1484.03	247.363	asb3
18	B6	119	94.4216	916.806	202.844	asb3
18	B6	120	94.7133	1020	193.637	asb3
25	C1	1	60.0006	1.29464e+06	37139.9	18s
25	C1	2	60.2926	1.28559e+06	37171.1	18s
25	C1	3	60.5846	1.27627e+06	37157	18s
25	C1	4	60.8766	1.26351e+06	37046.5	18s
25	C1	5	61.1686	1253611	36839	18s
25	C1	6	61.4606	1.24559e+06	36564.1	18s
25	C1	7	61.7526	1.23488e+06	36248.8	18s
25	C1	8	62.0446	1.22287e+06	35902.4	18s
25	C1	9	62.3366	1.21218e+06	35526.2	18s
25	C1	10	62.6286	1.20026e+06	35134.5	18s
25	C1	11	62.9206	1.19064e+06	34759.8	18s
25	C1	12	63.2126	1.18085e+06	34440.4	18s
25	C1	13	63.5046	1.17158e+06	34206.3	18s
25	C1	14	63.7966	1.15861e+06	34065.9	18s
25	C1	15	64.0886	1.14927e+06	34007.5	18s
25	C1	16	64.3806	1.14211e+06	34004.4	18s
25	C1	17	64.6726	1.1273e+06	34021.6	18s
25	C1	18	64.9646	1.12007e+06	34024.4	18s
25	C1	19	65.2566	1.10783e+06	33985.9	18s
25	C1	20	65.5486	1.09921e+06	33893.3	18s
25	C1	21	65.8406	1.08787e+06	33748.3	18s
25	C1	22	66.1326	1.07656e+06	33564.6	18s
25	C1	23	66.4246	1.06825e+06	33359.6	18s
25	C1	24	66.7166	1.05758e+06	33147.2	18s
25	C1	25	67.0086	1.04711e+06	32936.8	18s
25	C1	26	67.3006	1.03666e+06	32737.2	18s
25	C1	27	67.5926	1.02773e+06	32560.2	18s
25	C1	28	67.8846	1.01642e+06	32417.7	18s
25	C1	29	68.1766	1.00741e+06	32311.5	18s
25	C1	30	68.4686	998796	32224.6	18s
25	C1	31	68.7606	988178	32123.8	18s
25	C1	32	69.0526	976761	31976.4	18s
25	C1	33	69.3445	967761	31771.6	18s
25	C1	34	69.6365	957805	31531.6	18s
25	C1	35	69.9285	949137	31316.6	18s
25	C1	36	70.2205	938917	31158.9	18s
25	C1	37	70.5125	930394	31083.7	18s
25	C1	38	70.8045	921021	31083.5	18s
25	C1	39	71.0965	911041	31119.1	18s
25	C1	40	71.3885	901276	31132.9	18s
25	C1	41	71.6805	892066	31070.4	18s
25	C1	42	71.9725	880975	30900	18s
25	C1	43	72.2645	872056	30625	18s
25	C1	44	72.5565	863685	30281.6	18s
25	C1	45	72.8485	853666	29926.3	18s
25	C1	46	73.1405	845645	29616.4	18s
25	C1	47	73.4325	836416	29390.5	18s
25	C1	48	73.7245	828284	29257.3	18s
25	C1	49	74.0165	819783	29195	18s
25	C1	50	74.3085	809227	29163.6	18s
25	C1	51	74.6005	800738	29123.1	18s
25	C1	52	74.8925	791636	29050.2	18s
25	C1	53	75.1845	783797	28944.3	18s
25	C1	54	75.4765	774189	28821.8	18s
25	C1	55	75.7685	765474	28705.1	18s
25	C1	56	76.0605	756891	28613.2	18s
25	C1	57	76.3525	749062	28561.4	18s
25	C1	58	76.6445	738987	28564.5	18s
25	C1	59	76.9365	730303	28642.7	18s
25	C1	60	77.2285	722574	28822.2	18s
25	C1	61	77.5205	715100	29130.9	18s
25	C1	62	77.8125	703901	29593.9	18s
25	C1	63	78.1045	694976	30233.2	18s
25	C1	64	78.3965	685959	31073.7	18s
25	C1	65	78.6885	676706	32190.1	18s
25	C1	66	78.9805	666100	33623.8	18s
25	C1	67	79.2725	655952	35374.9	18s
25	C1	68	79.5645	643954	37457.1	18s
25	C1	69	79.8565	631056	39874.8	18s
25	C1	70	80.1485	617476	42643.4	18s
25	C1	71	80.4405	604258	45819.7	18s
25	C1	72	80.7325	589522	49524.9	18s
25	C1	73	81.0245	572808	53958.8	18s
25	C1	74	81.3165	555434	59407	18s
25	C1	75	81.6085	534824	66238.5	18s
25	C1	76	81.9005	512917	74871	18s
25	C1	77	82.1925	489302	85675	18s
25	C1	78	82.4845	459872	98786.8	18s
25	C1	79	82.7765	424397	113861	18s
25	C1	80	83.0685	376077	129851	18s
25	C1	81	83.3605	316020	144962	18s
25	C1	82	83.6525	251010	156873	18s
25	C1	83	83.9445	188022	163243	18s
25	C1	84	84.2365	133483	162353	18s
25	C1	85	84.5285	93131.6	153639	18s
25	C1	86	84.8205	67704.8	137923	18s
25	C1	87	85.1125	51715	117216	18s
25	C1	88	85.4045	43906.2	94192.9	18s
25	C1	89	85.6965	38738.2	71527.6	18s
25	C1	90	85.9884	37987.6	51332.3	18s
25	C1	91	86.2805	35248.1	34849.3	18s
25	C1	92	86.5724	34297.4	23015.2	18s
25	C1	93	86.8644	34266.8	14896	18s
25	C1	94	87.1564	33323.3	9605.48	18s
25	C1	95	87.4484	31412.1	6357.8	18s
25	C1	96	87.7404	29957.6	4434.48	18s
25	C1	97	88.0324	29623.3	3278.11	18s
25	C1	98	88.3244	30036.4	2520.68	18s
25	C1	99	88.6164	29906.1	1967.21	18s
25	C1	100	88.9084	29978.4	1549.15	18s
25	C1	101	89.2004	29134.4	1261.33	18s
25	C1	102	89.4924	27945.1	1103.71	18s
25	C1	103	89.7844	27111.5	1048.9	18s
25	C1	104	90.0764	27266.4	1044.03	18s
25	C1	105	90.3684	27390.6	1034.63	18s
25	C1	106	90.6604	26718.6	987.83	18s
25	C1	107	90.9524	25630.3	898.246	18s
25	C1	108	91.2444	26403.3	777.508	18s
25	C1	109	91.5364	25114.7	640.338	18s
25	C1	110	91.8284	26520.5	498.557	18s
25	C1	111	92.1204	25154.2	363.654	18s
25	C1	112	92.4124	25432.4	250.754	18s
25	C1	113	92.7044	25833.4	177.412	18s
25	C1	114	92.9964	25251.3	156.883	18s
25	C1	115	93.2884	24545.1	190.062	18s
25	C1	116	93.5804	23883.9	261.41	18s
25	C1	117	93.8724	24426.4	342.168	18s
25	C1	118	94.1644	23392.9	400.82	18s
25	C1	119	94.4564	23808.6	416.049	18s
25	C1	120	94.7484	24144.2	384.91	18s
26	C2	1	60.0006	1.46275e+06	44739.1	18s
26	C2	2	60.2926	1.44957e+06	44801.7	18s
26	C2	3	60.5846	1.4372e+06	44825.1	18s
26	C2	4	60.8766	1.42649e+06	44720.3	18s
26	C2	5	61.1686	1.41338e+06	44450.4	18s
26	C2	6	61.4606	1.40164e+06	44035.2	18s
26	C2	7	61.7526	1.38676e+06	43528.8	18s
26	C2	8	62.0446	1.37484e+06	42993.7	18s
26	C2	9	62.3366	1.36165e+06	42482.6	18s
26	C2	10	62.6286	1.34918e+06	42029.9	18s
26	C2	11	62.9206	1.3375e+06	41654.6	18s
26	C2	12	63.2126	1.3242e+06	41362.4	18s
26	C2	13	63.5046	1311745	41150.5	18s
26	C2	14	63.7966	1.30015e+06	41006.3	18s
26	C2	15	64.0886	1287022	40904.7	18s
26	C2	16	64.3806	1.27639e+06	40810.2	18s
26	C2	17	64.6726	1.26172e+06	40682.4	18s
26	C2	18	64.9646	1.25082e+06	40489.4	18s
26	C2	19	65.2566	1.23788e+06	40217.9	18s
26	C2	20	65.5486	1226301	39883.1	18s
26	C2	21	65.8406	1.21282e+06	39523.5	18s
26	C2	22	66.1326	1.20213e+06	39188	18s
26	C2	23	66.4246	1.19048e+06	38917.1	18s
26	C2	24	66.7166	1.17917e+06	38725.4	18s
26	C2	25	67.0086	1.16691e+06	38597.6	18s
26	C2	26	67.3006	1.15537e+06	38496.8	18s
26	C2	27	67.5926	1.144e+06	38383.7	18s
26	C2	28	67.8846	1.13088e+06	38234.1	18s
26	C2	29	68.1766	1119480	38047.1	18s
26	C2	30	68.4686	1.10902e+06	37840.7	18s
26	C2	31	68.7606	1.09721e+06	37636.5	18s
26	C2	32	69.0526	1.08516e+06	37445.8	18s
26	C2	33	69.3445	1.0748e+06	37263.8	18s
26	C2	34	69.6365	1064052	37075.3	18s
26	C2	35	69.9285	1.05108e+06	36868.6	18s
26	C2	36	70.2205	1.03961e+06	36649.3	18s
26	C2	37	70.5125	1.02971e+06	36432.3	18s
26	C2	38	70.8045	1.01977e+06	36235.2	18s
26	C2	39	71.0965	1.00791e+06	36064.3	18s
26	C2	40	71.3885	996988	35911.1	18s
26	C2	41	71.6805	984752	35761.5	18s
26	C2	42	71.9725	975484	35607.1	18s
26	C2	43	72.2645	964566	35446.2	18s
26	C2	44	72.5565	954353	35277.6	18s
26	C2	45	72.8485	942736	35092.8	18s
26	C2	46	73.1405	932604	34880.5	18s
26	C2	47	73.4325	921182	34636.5	18s
26	C2	48	73.7245	911794	34372.9	18s
26	C2	49	74.0165	901438	34115.9	18s
26	C2	50	74.3085	891053	33893.5	18s
26	C2	51	74.6005	882372	33721.3	18s
26	C2	52	74.8925	870446	33596	18s
26	C2	53	75.1845	860732	33501.1	18s
26	C2	54	75.4765	851065	33418.9	18s
26	C2	55	75.7685	840173	33340.4	18s
26	C2	56	76.0605	830820	33268.7	18s
26	C2	57	76.3525	820340	33217.5	18s
26	C2	58	76.6445	811156	33206.3	18s
26	C2	59	76.9365	800332	33263.4	18s
26	C2	60	77.2285	789690	33428	18s
26	C2	61	77.5205	781448	33753.9	18s
26	C2	62	77.8125	770570	34300.9	18s
26	C2	63	78.1045	761254	35123	18s
26	C2	64	78.3965	749409	36256.8	18s
26	C2	65	78.6885	736748	37732.1	18s
26	C2	66	78.9805	725495	39556.8	18s
26	C2	67	79.2725	714065	41726.1	18s
26	C2	68	79.5645	700316	44237.6	18s
26	C2	69	79.8565	683590	47085.8	18s
26	C2	70	80.1485	667656	50279.7	18s
26	C2	71	80.4405	651361	53877.6	18s
26	C2	72	80.7325	633587	58029.3	18s
26	C2	73	81.0245	614772	63002.5	18s
26	C2	74	81.3165	594151	69181	18s
26	C2	75	81.6085	570933	77024.5	18s
26	C2	76	81.9005	544260	86985.6	18s
26	C2	77	82.1925	513933	99366.7	18s
26	C2	78	82.4845	477883	114114	18s
26	C2	79	82.7765	434873	130583	18s
26	C2	80	83.0685	374841	147380	18s
26	C2	81	83.3605	303198	162397	18s
26	C2	82	83.6525	229962	173140	18s
26	C2	83	83.9445	162015	177305	18s
26	C2	84	84.2365	104868	173441	18s
26	C2	85	84.5285	62556.8	161423	18s
26	C2	86	84.8205	37884.9	142568	18s
26	C2	87	85.1125	25343.7	119306	18s
26	C2	88	85.4045	18151.1	94563.5	18s
26	C2	89	85.6965	12996.1	71056.2	18s
26	C2	90	85.9884	11404.1	50754.7	18s
26	C2	91	86.2805	9638.59	34676.5	18s
26	C2	92	86.5724	7920.17	22998.1	18s
26	C2	93	86.8644	7324.64	15001.4	18s
26	C2	94	87.1564	6386.49	9847.14	18s
26	C2	95	87.4484	5622.95	6672.96	18s
26	C2	96	87.7404	3807.89	4757.55	18s
26	C2	97	88.0324	4955.4	3581.4	18s
26	C2	98	88.3244	3479.18	2817.27	18s
26	C2	99	88.6164	3313.37	2287.32	18s
26	C2	100	88.9084	4120.38	1911.73	18s
26	C2	101	89.2004	2812.69	1661.66	18s
26	C2	102	89.4924	2292.17	1522.68	18s
26	C2	103	89.7844	2000.58	1472.91	18s
26	C2	104	90.0764	1104.69	1477.33	18s
26	C2	105	90.3684	1091.04	1494.63	18s
26	C2	106	90.6604	233.593	1488.56	18s
26	C2	107	90.9524	865.344	1436.07	18s
26	C2	108	91.2444	-1153.11	1329.45	18s
26	C2	109	91.5364	-259.073	1174.93	18s
26	C2	110	91.8284	131.378	991.137	18s
26	C2	111	92.1204	574.728	806.426	18s
26	C2	112	92.4124	-884.336	651.977	18s
26	C2	113	92.7044	-538.318	550.02	18s
26	C2	114	92.9964	-419.146	503.152	18s
26	C2	115	93.2884	-1343.72	492.488	18s
26	C2	116	93.5804	-1247.24	486.965	18s
26	C2	117	93.8724	-712.166	458.082	18s
26	C2	118	94.1644	-1479.09	391.383	18s
26	C2	119	94.4564	-1043.58	289.289	18s
26	C2	120	94.7484	-756.474	165.875	18s
27	C3	1	60.0011	1520415	40668	18s
27	C3	2	60.2934	1.50837e+06	40862.8	18s
27	C3	3	60.5857	1.4986e+06	41017.8	18s
27	C3	4	60.878	1.48773e+06	41026.7	18s
27	C3	5	61.1703	1.4755e+06	40838.9	18s
27	C3	6	61.4625	1.46355e+06	40474.7	18s
27	C3	7	61.7548	1450536	40008.6	18s
27	C3	8	62.0471	1.43896e+06	39535.9	18s
27	C3	9	62.3394	1.42863e+06	39138.6	18s
27	C3	10	62.6317	1.4147e+06	38864.5	18s
27	C3	11	62.924	1.40505e+06	38718.8	18s
27	C3	12	63.2163	1.39294e+06	38669.8	18s
27	C3	13	63.5086	1.38196e+06	38666.3	18s
27	C3	14	63.8009	1.36908e+06	38660.3	18s
27	C3	15	64.0932	1.35637e+06	38628.2	18s
27	C3	16	64.3854	1.34656e+06	38577.4	18s
27	C3	17	64.6777	1.33132e+06	38533.4	18s
27	C3	18	64.97	1.32402e+06	38518.6	18s
27	C3	19	65.2623	1.3104e+06	38535	18s
27	C3	20	65.5546	1.299e+06	38561.8	18s
27	C3	21	65.8469	1.28661e+06	38569.1	18s
27	C3	22	66.1392	1.27496e+06	38534.4	18s
27	C3	23	66.4315	1.26328e+06	38451.3	18s
27	C3	24	66.7238	1.25117e+06	38328.4	18s
27	C3	25	67.0161	1.23889e+06	38178	18s
27	C3	26	67.3083	1.2285e+06	38008	18s
27	C3	27	67.6006	1216710	37821.1	18s
27	C3	28	67.8929	1203547	37620.4	18s
27	C3	29	68.1852	1192223	37416.6	18s
27	C3	30	68.4775	1.18213e+06	37227.6	18s
27	C3	31	68.7698	1.17076e+06	37071.5	18s
27	C3	32	69.0621	1.15894e+06	36961.5	18s
27	C3	33	69.3544	1147129	36901.2	18s
27	C3	34	69.6467	1.1362e+06	36890.7	18s
27	C3	35	69.9389	1.12579e+06	36925.6	18s
27	C3	36	70.2312	1.11415e+06	36990.5	18s
27	C3	37	70.5235	1.103e+06	37054.6	18s
27	C3	38	70.8158	1.09066e+06	37075.5	18s
27	C3	39	71.1081	1078546	37013.4	18s
27	C3	40	71.4004	1.06874e+06	36849.9	18s
27	C3	41	71.6927	1.05579e+06	36596	18s
27	C3	42	71.985	1.04577e+06	36290.7	18s
27	C3	43	72.2773	1.03397e+06	35986.1	18s
27	C3	44	72.5695	1.02524e+06	35725.8	18s
27	C3	45	72.8618	1.01372e+06	35528.4	18s
27	C3	46	73.1541	1.00232e+06	35382.7	18s
27	C3	47	73.4464	991225	35258.6	18s
27	C3	48	73.7387	980378	35126.5	18s
27	C3	49	74.031	971136	34974.9	18s
27	C3	50	74.3233	959584	34812.7	18s
27	C3	51	74.6156	949077	34660.4	18s
27	C3	52	74.9079	938985	34538.4	18s
27	C3	53	75.2002	928404	34458.2	18s
27	C3	54	75.4924	918197	34422.2	18s
27	C3	55	75.7847	906524	34427	18s
27	C3	56	76.077	897319	34468.8	18s
27	C3	57	76.3693	886152	34547.2	18s
27	C3	58	76.6616	876183	34669.2	18s
27	C3	59	76.9539	864520	34852.6	18s
27	C3	60	77.2462	853996	35129.8	18s
27	C3	61	77.5385	844113	35547.3	18s
27	C3	62	77.8308	833320	36161.2	18s
27	C3	63	78.1231	822169	37023.2	18s
27	C3	64	78.4153	808276	38187.9	18s
27	C3	65	78.7076	797474	39671	18s
27	C3	66	78.9999	784536	41491.9	18s
27	C3	67	79.2922	770318	43672	18s
27	C3	68	79.5845	755594	46238.4	18s
27	C3	69	79.8768	739294	49225.7	18s
27	C3	70	80.1691	722022	52679.8	18s
27	C3	71	80.4614	703657	56675.4	18s
27	C3	72	80.7537	683462	61341.7	18s
27	C3	73	81.046	661831	66893.6	18s
27	C3	74	81.3382	637771	73653.9	18s
27	C3	75	81.6305	610934	82050.9	18s
27	C3	76	81.9228	580596	92561.2	18s
27	C3	77	82.2151	546554	105567	18s
27	C3	78	82.5074	503506	121121	18s
27	C3	79	82.7997	449529	138665	18s
27	C3	80	83.092	378052	156811	18s
27	C3	81	83.3843	298207	173347	18s
27	C3	82	83.6766	219393	185559	18s
27	C3	83	83.9688	151309	190865	18s
27	C3	84	84.2611	98183	187545	18s
27	C3	85	84.5534	62899.1	175316	18s
27	C3	86	84.8457	44452.2	155490	18s
27	C3	87	85.138	34124.1	130648	18s
27	C3	88	85.4303	28971.7	103962	18s
27	C3	89	85.7226	24880.5	78414	18s
27	C3	90	86.0149	22589	56196.7	18s
27	C3	91	86.3072	21341.5	38441.8	18s
27	C3	92	86.5995	20504.2	25443.6	18s
27	C3	93	86.8917	19562.8	16469	18s
27	C3	94	87.184	18176.4	10628.2	18s
27	C3	95	87.4763	17734.9	7011.32	18s
27	C3	96	87.7686	17572.1	4845.68	18s
27	C3	97	88.0609	16660.5	3560.44	18s
27	C3	98	88.3532	15756	2777.72	18s
27	C3	99	88.6455	16027	2269.76	18s
27	C3	100	88.9378	15472.4	1911.09	18s
27	C3	101	89.2301	15117.2	1639.88	18s
27	C3	102	89.5223	15255.3	1430.96	18s
27	C3	103	89.8146	14738.5	1276.73	18s
27	C3	104	90.1069	13523.4	1172.87	18s
27	C3	105	90.3992	13872.5	1108.86	18s
27	C3	106	90.6915	13599.6	1065.67	18s
27	C3	107	90.9838	13322.5	1020.79	18s
27	C3	108	91.2761	11959.8	956.918	18s
27	C3	109	91.5684	13759.4	869.328	18s
27	C3	110	91.8607	13076	768.066	18s
27	C3	111	92.153	12577.1	674.137	18s
27	C3	112	92.4452	12244.9	610.758	18s
27	C3	113	92.7375	11806.3	592.848	18s
27	C3	114	93.0298	11660.9	620.078	18s
27	C3	115	93.3221	11748.9	677.805	18s
27	C3	116	93.6144	11268.7	745.402	18s
27	C3	117	93.9067	11765.3	805.898	18s
27	C3	118	94.199	10576.8	850.598	18s
27	C3	119	94.4913	9908.82	877.402	18s
27	C3	120	94.7836	10837.3	887.266	18s
28	C4	1	60.0011	1.39514e+06	36453.9	asb3
28	C4	2	60.2934	1.38447e+06	36603.1	asb3
28	C4	3	60.5857	1373759	36717.8	asb3
28	C4	4	60.878	1.36597e+06	36730.8	asb3
28	C4	5	61.1703	1354459	36621.4	asb3
28	C4	6	61.4625	1.34238e+06	36420	asb3
28	C4	7	61.7548	1.33184e+06	36187.7	asb3
28	C4	8	62.0471	1.32132e+06	35983.1	asb3
28	C4	9	62.3394	1.31028e+06	35838.5	asb3
28	C4	10	62.6317	1.30046e+06	35750.3	asb3
28	C4	11	62.924	1.28787e+06	35690.1	asb3
28	C4	12	63.2163	1.27759e+06	35625.1	asb3
28	C4	13	63.5086	1.26611e+06	35536.9	asb3
28	C4	14	63.8009	1.25562e+06	35431.5	asb3
28	C4	15	64.0932	1.24301e+06	35335.2	asb3
28	C4	16	64.3854	1.23387e+06	35281.9	asb3
28	C4	17	64.6777	1221938	35290.8	asb3
28	C4	18	64.97	1212902	35353.5	asb3
28	C4	19	65.2623	1.20138e+06	35433.8	asb3
28	C4	20	65.5546	1.18995e+06	35483.5	asb3
28	C4	21	65.8469	1.17828e+06	35467.8	asb3
28	C4	22	66.1392	1.16646e+06	35380.1	asb3
28	C4	23	66.4315	1157828	35243.3	asb3
28	C4	24	66.7238	1.14447e+06	35094.3	asb3
28	C4	25	67.0161	1.1341e+06	34965.3	asb3
28	C4	26	67.3083	1.1258e+06	34870.4	asb3
28	C4	27	67.6006	1.11286e+06	34806.3	asb3
28	C4	28	67.8929	1101188	34760.4	asb3
28	C4	29	68.1852	1.09115e+06	34721.1	asb3
28	C4	30	68.4775	1.08135e+06	34680.6	asb3
28	C4	31	68.7698	1.07011e+06	34632.8	asb3
28	C4	32	69.0621	1.05867e+06	34572.4	asb3
28	C4	33	69.3544	1.04773e+06	34498.8	asb3
28	C4	34	69.6467	1.03777e+06	34421.9	asb3
28	C4	35	69.9389	1.02607e+06	34359.4	asb3
28	C4	36	70.2312	1.01801e+06	34326.5	asb3
28	C4	37	70.5235	1.00577e+06	34323.9	asb3
28	C4	38	70.8158	995204	34333.2	asb3
28	C4	39	71.1081	983452	34323.6	asb3
28	C4	40	71.4004	974718	34264.7	asb3
28	C4	41	71.6927	962291	34123.1	asb3
28	C4	42	71.985	952468	33904	asb3
28	C4	43	72.2773	941205	33626.3	asb3
28	C4	44	72.5695	932241	33325.8	asb3
28	C4	45	72.8618	921465	33049.2	asb3
28	C4	46	73.1541	911843	32841.6	asb3
28	C4	47	73.4464	902240	32735.2	asb3
28	C4	48	73.7387	891573	32737.4	asb3
28	C4	49	74.031	882892	32824.2	asb3
28	C4	50	74.3233	871498	32944.1	asb3
28	C4	51	74.6156	860986	33029.7	asb3
28	C4	52	74.9079	849323	33019.8	asb3
28	C4	53	75.2002	840621	32881.8	asb3
28	C4	54	75.4924	829689	32623.2	asb3
28	C4	55	75.7847	820549	32286.5	asb3
28	C4	56	76.077	811026	31932.6	asb3
28	C4	57	76.3693	801372	31618.7	asb3
28	C4	58	76.6616	791927	31385.6	asb3
28	C4	59	76.9539	782614	31258.6	asb3
28	C4	60	77.2462	772200	31260.1	asb3
28	C4	61	77.5385	763109	31427	asb3
28	C4	62	77.8308	754042	31827.7	asb3
28	C4	63	78.1231	744605	32573	asb3
28	C4	64	78.4153	733127	33824.3	asb3
28	C4	65	78.7076	723356	35646.7	asb3
28	C4	66	78.9999	711186	38346.4	asb3
28	C4	67	79.2922	700131	42314	asb3
28	C4	68	79.5845	683792	47975.7	asb3
28	C4	69	79.8768	664710	55826.7	asb3
28	C4	70	80.1691	642342	66396.4	asb3
28	C4	71	80.4614	611262	80167.6	asb3
28	C4	72	80.7537	574442	97407	asb3
28	C4	73	81.046	530531	117881	asb3
28	C4	74	81.3382	468189	140503	asb3
28	C4	75	81.6305	380068	163065	asb3
28	C4	76	81.9228	274416	182307	asb3
28	C4	77	82.2151	160371	194503	asb3
28	C4	78	82.5074	85206.3	196516	asb3
28	C4	79	82.7997	47578.5	186940	asb3
28	C4	80	83.092	34495.4	166793	asb3
28	C4	81	83.3843	29613.6	139336	asb3
28	C4	82	83.6766	26801.3	109062	asb3
28	C4	83	83.9688	22992.2	80306.8	asb3
28	C4	84	84.2611	18992.4	56118.6	asb3
28	C4	85	84.5534	18023.5	37798.9	asb3
28	C4	86	84.8457	16854.3	24092.9	asb3
28	C4	87	85.138	16031.5	15062.3	asb3
28	C4	88	85.4303	14904.3	9611.28	asb3
28	C4	89	85.7226	14220.6	6434.04	asb3
28	C4	90	86.0149	13014.2	4595.7	asb3
28	C4	91	86.3072	12509.8	3509.4	asb3
28	C4	92	86.5995	11849.3	2836.6	asb3
28	C4	93	86.8917	11064.2	2391.27	asb3
28	C4	94	87.184	11403.2	2075.91	asb3
28	C4	95	87.4763	10669.8	1844.66	asb3
28	C4	96	87.7686	10068.5	1680.27	asb3
28	C4	97	88.0609	9873.95	1575.7	asb3
28	C4	98	88.3532	8298.97	1519.92	asb3
28	C4	99	88.6455	8570.43	1491.37	asb3
28	C4	100	88.9378	8068.14	1461.71	asb3
28	C4	101	89.2301	7559.92	1406.61	asb3
28	C4	102	89.5223	7737.75	1315.62	asb3
28	C4	103	89.8146	7291.95	1194.66	asb3
28	C4	104	90.1069	6980.66	1059.43	asb3
28	C4	105	90.3992	6453.06	925.238	asb3
28	C4	106	90.6915	6620.14	799.996	asb3
28	C4	107	90.9838	6852.87	684.34	asb3
28	C4	108	91.2761	6135.34	577.066	asb3
28	C4	109	91.5684	6351.1	480.828	asb3
28	C4	110	91.8607	6436.92	403.559	asb3
28	C4	111	92.153	6357.3	354.965	asb3
28	C4	112	92.4452	5620.92	340.422	asb3
28	C4	113	92.7375	5125.34	355.953	asb3
28	C4	114	93.0298	5628.19	387.02	asb3
28	C4	115	93.3221	5274.93	412.66	asb3
28	C4	116	93.6144	4451.66	413.77	asb3
28	C4	117	93.9067	5838.05	381.715	asb3
28	C4	118	94.199	5405.69	322.137	asb3
28	C4	119	94.4913	5735.81	251.289	asb3
28	C4	120	94.7836	5125.61	187.281	asb3
29	C5	1	60.0007	1.38848e+06	36108	asb3
29	C5	2	60.2924	1.3795e+06	36279.8	asb3
29	C5	3	60.5841	1370368	36428.2	asb3
29	C5	4	60.8758	1360450	36501.1	asb3
29	C5	5	61.1675	1.34927e+06	36490.4	asb3
29	C5	6	61.4592	1.33871e+06	36429	asb3
29	C5	7	61.7509	1.32839e+06	36360.6	asb3
29	C5	8	62.0426	1.31877e+06	36309.6	asb3
29	C5	9	62.3343	1306254	36270.4	asb3
29	C5	10	62.626	1.29587e+06	36218.7	asb3
29	C5	11	62.9177	1.28443e+06	36132.8	asb3
29	C5	12	63.2094	1.2736e+06	36010.2	asb3
29	C5	13	63.5011	1.26153e+06	35868.7	asb3
29	C5	14	63.7928	1.25118e+06	35735.6	asb3
29	C5	15	64.0845	1.24118e+06	35633.1	asb3
29	C5	16	64.3763	1.22969e+06	35568.5	asb3
29	C5	17	64.668	1.21835e+06	35532.6	asb3
29	C5	18	64.9597	1.20839e+06	35509.4	asb3
29	C5	19	65.2514	1.19735e+06	35485	asb3
29	C5	20	65.5431	1.18657e+06	35456.3	asb3
29	C5	21	65.8348	1.17404e+06	35430.8	asb3
29	C5	22	66.1265	1.16489e+06	35417	asb3
29	C5	23	66.4182	1.15429e+06	35414.2	asb3
29	C5	24	66.7099	1.14334e+06	35407.7	asb3
29	C5	25	67.0016	1.13155e+06	35377.4	asb3
29	C5	26	67.2933	1.12017e+06	35310.7	asb3
29	C5	27	67.585	1.11019e+06	35212.9	asb3
29	C5	28	67.8767	1.09901e+06	35104	asb3
29	C5	29	68.1684	1087525	35006.7	asb3
29	C5	30	68.4601	1.07823e+06	34932.9	asb3
29	C5	31	68.7518	1.06787e+06	34877.9	asb3
29	C5	32	69.0435	1.05546e+06	34826.6	asb3
29	C5	33	69.3352	1.04474e+06	34765.9	asb3
[truncated: 3,807 more rows]

## Sheet: Melt Curve Result
Block Type	96-Well 0.2-mL Block
Calibration Background is expired	No
Calibration Background performed on	08-01-2022
Calibration Pure Dye ABY is expired	No
Calibration Pure Dye ABY performed on	08-01-2022
Calibration Pure Dye CY5 is expired	No
Calibration Pure Dye CY5 performed on	08-01-2022
Calibration Pure Dye FAM is expired	No
Calibration Pure Dye FAM performed on	08-01-2022
Calibration Pure Dye JUN is expired	No
Calibration Pure Dye JUN performed on	08-01-2022
Calibration Pure Dye MUSTANG PURPLE is expired	No
Calibration Pure Dye MUSTANG PURPLE performed on	08-01-2022
Calibration Pure Dye NED is expired	No
Calibration Pure Dye NED performed on	08-01-2022
Calibration Pure Dye ROX is expired	No
Calibration Pure Dye ROX performed on	08-01-2022
Calibration Pure Dye SYBR is expired	No
Calibration Pure Dye SYBR performed on	08-01-2022
Calibration Pure Dye TAMRA is expired	No
Calibration Pure Dye TAMRA performed on	08-01-2022
Calibration Pure Dye VIC is expired	No
Calibration Pure Dye VIC performed on	08-01-2022
Calibration ROI is expired	No
Calibration ROI performed on	08-01-2022
Calibration Uniformity is expired	No
Calibration Uniformity performed on	08-01-2022
Chemistry	SYBR_GREEN
Date Created	2023-12-01 02:27:15 AM CST
Experiment Barcode
Experiment Comment
Experiment File Name	D:\datas\huang lab\qxy\2023-12-01_004614.eds
Experiment Name	2023-12-01_004614
Experiment Run End Time	2023-11-30 23:21:19 PM CST
Experiment Type	Standard Curve
Instrument Name	272520824
Instrument Serial Number	272520824
Instrument Type	QuantStudio™ 5 System
Passive Reference	ROX
Post-read Stage/Step
Pre-read Stage/Step
Quantification Cycle Method	Ct
Signal Smoothing On	true
Stage where Melt Analysis is performed	Stage3
Stage/ Cycle where Ct Analysis is performed	Stage2, Step2
User Name
Well	Well Position	Sample	Target Name	Tm	Melt Peak Height
1	A1	1w	18s	84.2365	181274
2	A2	1w	18s	84.0905	194320
3	A3	1w	18s	84.115	203856
4	A4	1w	asb3	82.3613	205797
5	A5	1w	asb3	82.316	222218
6	A6	1w	asb3	82.4618	209872
13	B1	2w	18s	84.0905	168844
14	B2	2w	18s	84.0905	181018
15	B3	2w	18s	83.9688	179859
16	B4	2w	asb3	82.3613	205986
17	B5	2w	asb3	82.316	209391
18	B6	2w	asb3	82.4618	220659
25	C1	3w	18s	84.0905	163773
26	C2	3w	18s	83.9445	177305
27	C3	3w	18s	83.9688	190865
28	C4	3w	asb3	82.3613	196923
29	C5	3w	asb3	82.316	202846
30	C6	3w	asb3	82.4618	221102
37	D1	4w	18s	83.9445	163887
38	D2	4w	18s	83.7985	184510
39	D3	4w	18s	83.9688	190388
40	D4	4w	asb3	82.3613	194847
41	D5	4w	asb3	82.316	208361
42	D6	4w	asb3	82.4618	212035
49	E1	5w	18s	83.9445	175790
50	E2	5w	18s	83.7985	183842
51	E3	5w	18s	84.115	177511
52	E4	5w	asb3	82.3613	192069
53	E5	5w	asb3	82.316	219291
54	E6	5w	asb3	82.316	196545
61	F1	6w	18s	83.7985	164614
62	F2	6w	18s	83.6525	181925
63	F3	6w	18s	83.9688	182665
64	F4	6w	asb3	82.3613	199772
65	F5	6w	asb3	82.1701	178502
65	F5	6w	asb3	74.8775	56229.9
66	F6	6w	asb3	82.1701	169865
66	F6	6w	asb3	75.1693	49507
73	G1	7w	18s	83.7985	165382
74	G2	7w	18s	83.7985	170205
75	G3	7w	18s	83.9688	170835
76	G4	7w	asb3	82.3613	190333
77	G5	7w	asb3	82.1701	198863
78	G6	7w	asb3	82.1701	191042
85	H1	8w	18s	83.7985	148193
86	H2	8w	18s	83.9445	182208
87	H3	8w	18s	84.115	169328
87	H3	8w	18s	68.7698	51150.4
88	H4	8w	asb3	82.5074	179452
89	H5	8w	asb3	82.316	175910
90	H6	8w	asb3	82.316	200084
