# Supplementary material for: ASB3 ablation has no detectable effects on spermatogenesis and fertility in male mice
Source: PeerJ journal article supplement (doi:10.7717/peerj.19738), 2025-07-31
Supplement: RawDataFig1.zip [file asb3-多组织脏器.xls]

## Sheet: Results (2)
Well	Well Position	Omit	Sample Name	Target Name	Task	Reporter	Quencher	CT	Ct Mean	Ct SD	Quantity	Quantity Mean	Quantity SD	Y-Intercept	R(superscript 2)	Slope	Efficiency	Automatic Ct Threshold	Ct Threshold	Automatic Baseline	Baseline Start	Baseline End	Amp Status	Comments	Cq Conf	Tm1	Tm2	Tm3	Tm4
1	A1	FALSE	xin	18s	UNKNOWN	SYBR	None	6.67282	6.62241	0.0655062								TRUE	0.669111	TRUE	3	3	Amp		0.920808	84.1834
2	A2	FALSE	xin	18s	UNKNOWN	SYBR	None	6.54837	6.62241	0.0655062								TRUE	0.669111	TRUE	3	3	Amp		0.907622	84.1834
3	A3	FALSE	xin	18s	UNKNOWN	SYBR	None	6.64605	6.62241	0.0655062								TRUE	0.669111	TRUE	3	3	Amp		0.870447	83.9164
4	A4	FALSE	zigong	18s	UNKNOWN	SYBR	None	5.76253	5.86933	0.139253								TRUE	0.669111	TRUE	3	3	Amp		0.909447	83.9164
5	A5	FALSE	zigong	18s	UNKNOWN	SYBR	None	5.81862	5.86933	0.139253								TRUE	0.669111	TRUE	3	3	Amp		0.890906	83.8713
6	A6	FALSE	zigong	18s	UNKNOWN	SYBR	None	6.02683	5.86933	0.139253								TRUE	0.669111	TRUE	3	3	Amp		0.888582	83.8713
7	A7	FALSE	xin	asb3	UNKNOWN	SYBR	None	24.0371	24.2755	0.436157								TRUE	0.546931	TRUE	3	17	Amp		0.951497	82.4458
8	A8	FALSE	xin	asb3	UNKNOWN	SYBR	None	24.7789	24.2755	0.436157								TRUE	0.546931	TRUE	3	18	Amp		0.849588	82.4458
9	A9	FALSE	xin	asb3	UNKNOWN	SYBR	None	24.0105	24.2755	0.436157								TRUE	0.546931	TRUE	3	18	Amp		0.955103	82.4421
10	A10	FALSE	zigong	asb3	UNKNOWN	SYBR	None	22.976	22.9965	0.037703								TRUE	0.546931	TRUE	3	17	Amp		0.925797	82.1525
11	A11	FALSE	zigong	asb3	UNKNOWN	SYBR	None	22.9734	22.9965	0.037703								TRUE	0.546931	TRUE	3	17	Amp		0.924858	82.4639
12	A12	FALSE	zigong	asb3	UNKNOWN	SYBR	None	23.04	22.9965	0.037703								TRUE	0.546931	TRUE	3	16	Amp		0.920078	82.6089
13	B1	FALSE	gan	18s	UNKNOWN	SYBR	None	6.99457	7.00997	0.0403717								TRUE	0.669111	TRUE	3	3	Amp		0.933184	84.0386
14	B2	FALSE	gan	18s	UNKNOWN	SYBR	None	6.97957	7.00997	0.0403717								TRUE	0.669111	TRUE	3	3	Amp		0.914234	83.8938
15	B3	FALSE	gan	18s	UNKNOWN	SYBR	None	7.05577	7.00997	0.0403717								TRUE	0.669111	TRUE	3	3	Amp		0.897285	83.7715
16	B4	FALSE	ruanchao	18s	UNKNOWN	SYBR	None	5.8045	5.77832	0.0247151								TRUE	0.669111	TRUE	3	3	Amp		0.89921	83.9164
17	B5	FALSE	ruanchao	18s	UNKNOWN	SYBR	None	5.77507	5.77832	0.0247151								TRUE	0.669111	TRUE	3	3	Amp		0.904926	83.7267
18	B6	FALSE	ruanchao	18s	UNKNOWN	SYBR	None	5.75539	5.77832	0.0247151								TRUE	0.669111	TRUE	3	3	Amp		0.900804	83.8713
19	B7	FALSE	gan	asb3	UNKNOWN	SYBR	None	25.1381	25.0714	0.0812903								TRUE	0.546931	TRUE	3	19	Amp		0.965605	82.301
20	B8	FALSE	gan	asb3	UNKNOWN	SYBR	None	24.9809	25.0714	0.0812903								TRUE	0.546931	TRUE	3	19	Amp		0.971894	82.5907
21	B9	FALSE	gan	asb3	UNKNOWN	SYBR	None	25.0953	25.0714	0.0812903								TRUE	0.546931	TRUE	3	19	Amp		0.970827	82.4421
22	B10	FALSE	ruanchao	asb3	UNKNOWN	SYBR	None	22.5071	22.5073	0.0172257								TRUE	0.546931	TRUE	3	17	Amp		0.922615	82.2973
23	B11	FALSE	ruanchao	asb3	UNKNOWN	SYBR	None	22.5246	22.5073	0.0172257								TRUE	0.546931	TRUE	3	15	Amp		0.922932	82.4639
24	B12	FALSE	ruanchao	asb3	UNKNOWN	SYBR	None	22.4901	22.5073	0.0172257								TRUE	0.546931	TRUE	3	16	Amp		0.91813	82.4639
25	C1	FALSE	pi	18s	UNKNOWN	SYBR	None	8.15175	8.03518	0.119407								TRUE	0.669111	TRUE	3	4	Amp		0.918058	83.749
26	C2	FALSE	pi	18s	UNKNOWN	SYBR	None	8.04067	8.03518	0.119407								TRUE	0.669111	TRUE	3	4	Amp		0.914068	83.6042
27	C3	FALSE	pi	18s	UNKNOWN	SYBR	None	7.91312	8.03518	0.119407								TRUE	0.669111	TRUE	3	4	Amp		0.927626	83.6266
28	C4	FALSE	jiruo	18s	UNKNOWN	SYBR	None	7.06591	7.04371	0.0192421								TRUE	0.669111	TRUE	3	3	Amp		0.905998	83.9164
29	C5	FALSE	jiruo	18s	UNKNOWN	SYBR	None	7.03175	7.04371	0.0192421								TRUE	0.669111	TRUE	3	3	Amp		0.910805	83.8713
30	C6	FALSE	jiruo	18s	UNKNOWN	SYBR	None	7.03348	7.04371	0.0192421								TRUE	0.669111	TRUE	3	3	Amp		0.919444	83.8713
31	C7	FALSE	pi	asb3	UNKNOWN	SYBR	None	24.2551	24.2875	0.0286066								TRUE	0.546931	TRUE	3	17	Amp		0.974881	82.1562
32	C8	FALSE	pi	asb3	UNKNOWN	SYBR	None	24.3092	24.2875	0.0286066								TRUE	0.546931	TRUE	3	18	Amp		0.971782	82.1562
33	C9	FALSE	pi	asb3	UNKNOWN	SYBR	None	24.2983	24.2875	0.0286066								TRUE	0.546931	TRUE	3	18	Amp		0.976985	82.0077
34	C10	FALSE	jiruo	asb3	UNKNOWN	SYBR	None	25.287	25.1365	0.130517								TRUE	0.546931	TRUE	3	18	Amp		0.979109	82.1525
35	C11	FALSE	jiruo	asb3	UNKNOWN	SYBR	None	25.0544	25.1365	0.130517								TRUE	0.546931	TRUE	3	18	Amp		0.966783	82.4639
36	C12	FALSE	jiruo	asb3	UNKNOWN	SYBR	None	25.0681	25.1365	0.130517								TRUE	0.546931	TRUE	3	19	Amp		0.967549	82.4639
37	D1	FALSE	fei	18s	UNKNOWN	SYBR	None	6.12036	6.05322	0.0758335								TRUE	0.669111	TRUE	3	3	Amp		0.894302	83.749
38	D2	FALSE	fei	18s	UNKNOWN	SYBR	None	6.06834	6.05322	0.0758335								TRUE	0.669111	TRUE	3	3	Amp		0.920249	83.749
39	D3	FALSE	fei	18s	UNKNOWN	SYBR	None	5.97097	6.05322	0.0758335								TRUE	0.669111	TRUE	3	3	Amp		0.886397	83.9164
40	D4	FALSE	gaowan	18s	UNKNOWN	SYBR	None	5.89644	5.85433	0.0527692								TRUE	0.669111	TRUE	3	3	Amp		0.905192	83.7715
41	D5	FALSE	gaowan	18s	UNKNOWN	SYBR	None	5.79514	5.85433	0.0527692								TRUE	0.669111	TRUE	3	3	Amp		0.918223	83.8713
42	D6	FALSE	gaowan	18s	UNKNOWN	SYBR	None	5.87143	5.85433	0.0527692								TRUE	0.669111	TRUE	3	3	Amp		0.927797	83.7267
43	D7	FALSE	fei	asb3	UNKNOWN	SYBR	None	23.5507	23.598	0.07526								TRUE	0.546931	TRUE	3	17	Amp		0.921613	82.1562
44	D8	FALSE	fei	asb3	UNKNOWN	SYBR	None	23.5586	23.598	0.07526								TRUE	0.546931	TRUE	3	18	Amp		0.927472	82.301
45	D9	FALSE	fei	asb3	UNKNOWN	SYBR	None	23.6848	23.598	0.07526								TRUE	0.546931	TRUE	3	18	Amp		0.92582	82.1525
46	D10	FALSE	gaowan	asb3	UNKNOWN	SYBR	None	20.9387	20.9198	0.0177467								TRUE	0.546931	TRUE	3	15	Amp		0.907851	82.1525
47	D11	FALSE	gaowan	asb3	UNKNOWN	SYBR	None	20.9173	20.9198	0.0177467								TRUE	0.546931	TRUE	3	15	Amp		0.916291	82.319
48	D12	FALSE	gaowan	asb3	UNKNOWN	SYBR	None	20.9035	20.9198	0.0177467								TRUE	0.546931	TRUE	3	15	Amp		0.916481	82.319
49	E1	FALSE	shen	18s	UNKNOWN	SYBR	None	6.09549	6.03693	0.139294								TRUE	0.669111	TRUE	3	3	Amp		0.877503	83.749
50	E2	FALSE	shen	18s	UNKNOWN	SYBR	None	6.13738	6.03693	0.139294								TRUE	0.669111	TRUE	3	3	Amp		0.885105	83.6042
51	E3	FALSE	shen	18s	UNKNOWN	SYBR	None	5.87791	6.03693	0.139294								TRUE	0.669111	TRUE	3	3	Amp		0.880969	83.9164
52	E4	FALSE	zhifang	18s	UNKNOWN	SYBR	None	6.10686	6.13079	0.0207291								TRUE	0.669111	TRUE	3	3	Amp		0.892247	83.9164
53	E5	FALSE	zhifang	18s	UNKNOWN	SYBR	None	6.14319	6.13079	0.0207291								TRUE	0.669111	TRUE	3	3	Amp		0.882563	83.7267
54	E6	FALSE	zhifang	18s	UNKNOWN	SYBR	None	6.14233	6.13079	0.0207291								TRUE	0.669111	TRUE	3	3	Amp		0.897185	83.7267
55	E7	FALSE	shen	asb3	UNKNOWN	SYBR	None	23.8695	23.8327	0.0485493								TRUE	0.546931	TRUE	3	18	Amp		0.933829	82.0114
56	E8	FALSE	shen	asb3	UNKNOWN	SYBR	None	23.7777	23.8327	0.0485493								TRUE	0.546931	TRUE	3	17	Amp		0.938296	82.1562
57	E9	FALSE	shen	asb3	UNKNOWN	SYBR	None	23.8508	23.8327	0.0485493								TRUE	0.546931	TRUE	3	17	Amp		0.930727	82.1525
58	E10	FALSE	zhifang	asb3	UNKNOWN	SYBR	None	23.444	23.5374	0.084872								TRUE	0.546931	TRUE	3	17	Amp		0.944812	82.2973
59	E11	FALSE	zhifang	asb3	UNKNOWN	SYBR	None	23.5583	23.5374	0.084872								TRUE	0.546931	TRUE	3	17	Amp		0.945622	82.319
60	E12	FALSE	zhifang	asb3	UNKNOWN	SYBR	None	23.6098	23.5374	0.084872								TRUE	0.546931	TRUE	3	17	Amp		0.942908	82.319
61	F1	FALSE	nao	18s	UNKNOWN	SYBR	None	6.15677	6.0765	0.0794208								TRUE	0.669111	TRUE	3	3	Amp		0.943086	83.749
62	F2	FALSE	nao	18s	UNKNOWN	SYBR	None	6.07479	6.0765	0.0794208								TRUE	0.669111	TRUE	3	3	Amp		0.923566	83.749
63	F3	FALSE	nao	18s	UNKNOWN	SYBR	None	5.99795	6.0765	0.0794208								TRUE	0.669111	TRUE	3	3	Amp		0.872374	83.9164
67	F7	FALSE	nao	asb3	UNKNOWN	SYBR	None	22.9132	22.9291	0.0184539								TRUE	0.546931	TRUE	3	17	Amp		0.932362	82.1562
68	F8	FALSE	nao	asb3	UNKNOWN	SYBR	None	22.9493	22.9291	0.0184539								TRUE	0.546931	TRUE	3	17	Amp		0.920743	82.301
69	F9	FALSE	nao	asb3	UNKNOWN	SYBR	None	22.9247	22.9291	0.0184539								TRUE	0.546931	TRUE	3	16	Amp		0.932938	82.1525
73	G1	FALSE	chang	18s	UNKNOWN	SYBR	None	5.41803	5.36401	0.0485348								TRUE	0.669111	TRUE	3	3	Amp		0.902655	83.749
74	G2	FALSE	chang	18s	UNKNOWN	SYBR	None	5.34993	5.36401	0.0485348								TRUE	0.669111	TRUE	3	3	Amp		0.895851	83.8938
75	G3	FALSE	chang	18s	UNKNOWN	SYBR	None	5.32408	5.36401	0.0485348								TRUE	0.669111	TRUE	3	3	Amp		0.879096	84.0614
79	G7	FALSE	chang	asb3	UNKNOWN	SYBR	None	22.9708	22.9721	0.0315915								TRUE	0.546931	TRUE	3	17	Amp		0.883485	82.1562
80	G8	FALSE	chang	asb3	UNKNOWN	SYBR	None	22.9412	22.9721	0.0315915								TRUE	0.546931	TRUE	3	17	Amp		0.884007	82.301
81	G9	FALSE	chang	asb3	UNKNOWN	SYBR	None	23.0044	22.9721	0.0315915								TRUE	0.546931	TRUE	3	17	Amp		0.882113	82.2973
85	H1	FALSE	wei	18s	UNKNOWN	SYBR	None	6.1896	6.13467	0.0527091								TRUE	0.669111	TRUE	3	3	Amp		0.95768	83.8938
86	H2	FALSE	wei	18s	UNKNOWN	SYBR	None	6.08451	6.13467	0.0527091								TRUE	0.669111	TRUE	3	3	Amp		0.920563	83.8938
87	H3	FALSE	wei	18s	UNKNOWN	SYBR	None	6.12989	6.13467	0.0527091								TRUE	0.669111	TRUE	3	3	Amp		0.9281	84.0614
91	H7	FALSE	wei	asb3	UNKNOWN	SYBR	None	23.8417	23.9233	0.103564								TRUE	0.546931	TRUE	3	17	Amp		0.93929	82.301
92	H8	FALSE	wei	asb3	UNKNOWN	SYBR	None	24.0398	23.9233	0.103564								TRUE	0.546931	TRUE	3	18	Amp		0.915591	82.1562
93	H9	FALSE	wei	asb3	UNKNOWN	SYBR	None	23.8884	23.9233	0.103564								TRUE	0.546931	TRUE	3	17	Amp		0.937539	82.2973
				CT	A	目的基因
		xin	18s	6.67282	6.62241	24.0371	17.4147	5.72354e-06	57.2354
		xin	18s	6.54837		24.7789	18.1565	3.42262e-06	34.2262
		xin	18s	6.64605		24.0105	17.3881	5.82996e-06	58.2996
		zigong	18s	5.76253	5.86933	22.976	17.1067	7.08539e-06	70.8539
		zigong	18s	5.81862		22.9734	17.1041	7.09849e-06	70.9849
		zigong	18s	6.02683		23.04	17.1707	6.77827e-06	67.7827
		gan	18s	6.99457	7.00997	25.1381	18.1282	3.49042e-06	34.9042
		gan	18s	6.97957		24.9809	17.9709	3.89236e-06	38.9236
		gan	18s	7.05577		25.0953	18.0853	3.59562e-06	35.9562
		ruanchao	18s	5.8045	5.77832	22.5071	16.7288	9.20712e-06	92.0712
		ruanchao	18s	5.77507		22.5246	16.7463	9.09652e-06	90.9652
		ruanchao	18s	5.75539		22.4901	16.7118	9.31635e-06	93.1635
		pi	18s	8.15175	8.03518	24.2551	16.22	1.31011e-05	131.011
		pi	18s	8.04067		24.3092	16.2741	1.26188e-05	126.188
		pi	18s	7.91312		24.2983	16.2631	1.27152e-05	127.152
		jiruo	18s	7.06591	7.04371	25.287	18.2433	3.22271e-06	32.2271
		jiruo	18s	7.03175		25.0544	18.0107	3.78648e-06	37.8648
		jiruo	18s	7.03348		25.0681	18.0244	3.75081e-06	37.5081
		fei	18s	6.12036	6.05322	23.5507	17.4974	5.40441e-06	54.0441
		fei	18s	6.06834		23.5586	17.5054	5.37475e-06	53.7475
		fei	18s	5.97097		23.6848	17.6316	4.92456e-06	49.2456
		gaowan	18s	5.89644	5.85433	20.9387	15.0844	2.8784e-05	287.84
		gaowan	18s	5.79514		20.9173	15.0629	2.92151e-05	292.151
		gaowan	18s	5.87143		20.9035	15.0492	2.94952e-05	294.952
		shen	18s	6.09549	6.03693	23.8695	17.8326	4.28399e-06	42.8399
		shen	18s	6.13738		23.7777	17.7407	4.56568e-06	45.6568
		shen	18s	5.87791		23.8508	17.8139	4.33995e-06	43.3995
		zhifang	18s	6.10686	6.13079	23.444	17.3132	6.1407e-06	61.407
		zhifang	18s	6.14319		23.5583	17.4276	5.67261e-06	56.7261
		zhifang	18s	6.14233		23.6098	17.479	5.47401e-06	54.7401
		nao	18s	6.15677	6.0765	22.9132	16.8367	8.54396e-06	85.4396
		nao	18s	6.07479		22.9493	16.8728	8.33263e-06	83.3263
		nao	18s	5.99795		22.9247	16.8482	8.47583e-06	84.7583
		chang	18s	5.41803	5.36401	22.9708	17.6068	5.00996e-06	50.0996
		chang	18s	5.34993		22.9412	17.5772	5.11371e-06	51.1371
		chang	18s	5.32408		23.0044	17.6403	4.89473e-06	48.9473
		wei	18s	6.1896	6.13467	23.8417	17.707	4.67376e-06	46.7376
		wei	18s	6.08451		24.0398	17.9051	4.07402e-06	40.7402
		wei	18s	6.12989		23.8884	17.7537	4.52471e-06	45.2471
		Heart	Liver	Spleen	Lung	Kidney	Brain	Muscle	Testis	Fat	Ovary	Uterus	Intestines	Stomach
		57.2354	34.9042	131.011	54.0441	42.8399	85.4396	32.2271	287.84	61.407	92.0712	70.8539	50.0996	46.7376
		34.2262	38.9236	126.188	53.7475	45.6568	83.3263	37.8648	292.151	56.7261	90.9652	70.9849	51.1371	40.7402
		58.2996	35.9562	127.152	49.2456	43.3995	84.7583	37.5081	294.952	54.7401	93.1635	67.7827	48.9473	45.2471

## Sheet: Sample Setup
Block Type	96-Well 0.2-mL Block
Calibration Background is expired	No
Calibration Background performed on	08-01-2022
Calibration Pure Dye ABY is expired	No
Calibration Pure Dye ABY performed on	08-01-2022
Calibration Pure Dye CY5 is expired	No
Calibration Pure Dye CY5 performed on	08-01-2022
Calibration Pure Dye FAM is expired	No
Calibration Pure Dye FAM performed on	08-01-2022
Calibration Pure Dye JUN is expired	No
Calibration Pure Dye JUN performed on	08-01-2022
Calibration Pure Dye MUSTANG PURPLE is expired	No
Calibration Pure Dye MUSTANG PURPLE performed on	08-01-2022
Calibration Pure Dye NED is expired	No
Calibration Pure Dye NED performed on	08-01-2022
Calibration Pure Dye ROX is expired	No
Calibration Pure Dye ROX performed on	08-01-2022
Calibration Pure Dye SYBR is expired	No
Calibration Pure Dye SYBR performed on	08-01-2022
Calibration Pure Dye TAMRA is expired	No
Calibration Pure Dye TAMRA performed on	08-01-2022
Calibration Pure Dye VIC is expired	No
Calibration Pure Dye VIC performed on	08-01-2022
Calibration ROI is expired	No
Calibration ROI performed on	08-01-2022
Calibration Uniformity is expired	No
Calibration Uniformity performed on	08-01-2022
Chemistry	SYBR_GREEN
Date Created	2023-12-01 04:10:17 AM CST
Experiment Barcode
Experiment Comment
Experiment File Name	D:\datas\huang lab\qxy\2023-12-01_023705.eds
Experiment Name	2023-12-01_023705
Experiment Run End Time	2023-12-01 01:07:46 AM CST
Experiment Type	Standard Curve
Instrument Name	272520824
Instrument Serial Number	272520824
Instrument Type	QuantStudio™ 5 System
Passive Reference	ROX
Post-read Stage/Step
Pre-read Stage/Step
Quantification Cycle Method	Ct
Signal Smoothing On	true
Stage where Melt Analysis is performed	Stage3
Stage/ Cycle where Ct Analysis is performed	Stage2, Step2
User Name
Well	Well Position	Sample Name	Sample Color	Biogroup Name	Biogroup Color	Target Name	Target Color	Task	Reporter	Quencher	Quantity	Comments
1	A1	xin	RGB(0,0,255)			18s	RGB(176,23,31)	UNKNOWN	SYBR	None
2	A2	xin	RGB(0,0,255)			18s	RGB(176,23,31)	UNKNOWN	SYBR	None
3	A3	xin	RGB(0,0,255)			18s	RGB(176,23,31)	UNKNOWN	SYBR	None
4	A4	zigong	RGB(238,220,130)			18s	RGB(176,23,31)	UNKNOWN	SYBR	None
5	A5	zigong	RGB(238,220,130)			18s	RGB(176,23,31)	UNKNOWN	SYBR	None
6	A6	zigong	RGB(238,220,130)			18s	RGB(176,23,31)	UNKNOWN	SYBR	None
7	A7	xin	RGB(0,0,255)			asb3	RGB(0,0,255)	UNKNOWN	SYBR	None
8	A8	xin	RGB(0,0,255)			asb3	RGB(0,0,255)	UNKNOWN	SYBR	None
9	A9	xin	RGB(0,0,255)			asb3	RGB(0,0,255)	UNKNOWN	SYBR	None
10	A10	zigong	RGB(238,220,130)			asb3	RGB(0,0,255)	UNKNOWN	SYBR	None
11	A11	zigong	RGB(238,220,130)			asb3	RGB(0,0,255)	UNKNOWN	SYBR	None
12	A12	zigong	RGB(238,220,130)			asb3	RGB(0,0,255)	UNKNOWN	SYBR	None
13	B1	gan	RGB(0,139,69)			18s	RGB(176,23,31)	UNKNOWN	SYBR	None
14	B2	gan	RGB(0,139,69)			18s	RGB(176,23,31)	UNKNOWN	SYBR	None
15	B3	gan	RGB(0,139,69)			18s	RGB(176,23,31)	UNKNOWN	SYBR	None
16	B4	ruanchao	RGB(238,238,0)			18s	RGB(176,23,31)	UNKNOWN	SYBR	None
17	B5	ruanchao	RGB(238,238,0)			18s	RGB(176,23,31)	UNKNOWN	SYBR	None
18	B6	ruanchao	RGB(238,238,0)			18s	RGB(176,23,31)	UNKNOWN	SYBR	None
19	B7	gan	RGB(0,139,69)			asb3	RGB(0,0,255)	UNKNOWN	SYBR	None
20	B8	gan	RGB(0,139,69)			asb3	RGB(0,0,255)	UNKNOWN	SYBR	None
21	B9	gan	RGB(0,139,69)			asb3	RGB(0,0,255)	UNKNOWN	SYBR	None
22	B10	ruanchao	RGB(238,238,0)			asb3	RGB(0,0,255)	UNKNOWN	SYBR	None
23	B11	ruanchao	RGB(238,238,0)			asb3	RGB(0,0,255)	UNKNOWN	SYBR	None
24	B12	ruanchao	RGB(238,238,0)			asb3	RGB(0,0,255)	UNKNOWN	SYBR	None
25	C1	pi	RGB(255,127,0)			18s	RGB(176,23,31)	UNKNOWN	SYBR	None
26	C2	pi	RGB(255,127,0)			18s	RGB(176,23,31)	UNKNOWN	SYBR	None
27	C3	pi	RGB(255,127,0)			18s	RGB(176,23,31)	UNKNOWN	SYBR	None
28	C4	jiruo	RGB(142,142,56)			18s	RGB(176,23,31)	UNKNOWN	SYBR	None
29	C5	jiruo	RGB(142,142,56)			18s	RGB(176,23,31)	UNKNOWN	SYBR	None
30	C6	jiruo	RGB(142,142,56)			18s	RGB(176,23,31)	UNKNOWN	SYBR	None
31	C7	pi	RGB(255,127,0)			asb3	RGB(0,0,255)	UNKNOWN	SYBR	None
32	C8	pi	RGB(255,127,0)			asb3	RGB(0,0,255)	UNKNOWN	SYBR	None
33	C9	pi	RGB(255,127,0)			asb3	RGB(0,0,255)	UNKNOWN	SYBR	None
34	C10	jiruo	RGB(142,142,56)			asb3	RGB(0,0,255)	UNKNOWN	SYBR	None
35	C11	jiruo	RGB(142,142,56)			asb3	RGB(0,0,255)	UNKNOWN	SYBR	None
36	C12	jiruo	RGB(142,142,56)			asb3	RGB(0,0,255)	UNKNOWN	SYBR	None
37	D1	fei	RGB(139,137,112)			18s	RGB(176,23,31)	UNKNOWN	SYBR	None
38	D2	fei	RGB(139,137,112)			18s	RGB(176,23,31)	UNKNOWN	SYBR	None
39	D3	fei	RGB(139,137,112)			18s	RGB(176,23,31)	UNKNOWN	SYBR	None
40	D4	gaowan	RGB(238,44,44)			18s	RGB(176,23,31)	UNKNOWN	SYBR	None
41	D5	gaowan	RGB(238,44,44)			18s	RGB(176,23,31)	UNKNOWN	SYBR	None
42	D6	gaowan	RGB(238,44,44)			18s	RGB(176,23,31)	UNKNOWN	SYBR	None
43	D7	fei	RGB(139,137,112)			asb3	RGB(0,0,255)	UNKNOWN	SYBR	None
44	D8	fei	RGB(139,137,112)			asb3	RGB(0,0,255)	UNKNOWN	SYBR	None
45	D9	fei	RGB(139,137,112)			asb3	RGB(0,0,255)	UNKNOWN	SYBR	None
46	D10	gaowan	RGB(238,44,44)			asb3	RGB(0,0,255)	UNKNOWN	SYBR	None
47	D11	gaowan	RGB(238,44,44)			asb3	RGB(0,0,255)	UNKNOWN	SYBR	None
48	D12	gaowan	RGB(238,44,44)			asb3	RGB(0,0,255)	UNKNOWN	SYBR	None
49	E1	shen	RGB(238,121,66)			18s	RGB(176,23,31)	UNKNOWN	SYBR	None
50	E2	shen	RGB(238,121,66)			18s	RGB(176,23,31)	UNKNOWN	SYBR	None
51	E3	shen	RGB(238,121,66)			18s	RGB(176,23,31)	UNKNOWN	SYBR	None
52	E4	zhifang	RGB(51,161,201)			18s	RGB(176,23,31)	UNKNOWN	SYBR	None
53	E5	zhifang	RGB(51,161,201)			18s	RGB(176,23,31)	UNKNOWN	SYBR	None
54	E6	zhifang	RGB(51,161,201)			18s	RGB(176,23,31)	UNKNOWN	SYBR	None
55	E7	shen	RGB(238,121,66)			asb3	RGB(0,0,255)	UNKNOWN	SYBR	None
56	E8	shen	RGB(238,121,66)			asb3	RGB(0,0,255)	UNKNOWN	SYBR	None
57	E9	shen	RGB(238,121,66)			asb3	RGB(0,0,255)	UNKNOWN	SYBR	None
58	E10	zhifang	RGB(51,161,201)			asb3	RGB(0,0,255)	UNKNOWN	SYBR	None
59	E11	zhifang	RGB(51,161,201)			asb3	RGB(0,0,255)	UNKNOWN	SYBR	None
60	E12	zhifang	RGB(51,161,201)			asb3	RGB(0,0,255)	UNKNOWN	SYBR	None
61	F1	nao	RGB(142,56,142)			18s	RGB(176,23,31)	UNKNOWN	SYBR	None
62	F2	nao	RGB(142,56,142)			18s	RGB(176,23,31)	UNKNOWN	SYBR	None
63	F3	nao	RGB(142,56,142)			18s	RGB(176,23,31)	UNKNOWN	SYBR	None
64	F4
65	F5
66	F6
67	F7	nao	RGB(142,56,142)			asb3	RGB(0,0,255)	UNKNOWN	SYBR	None
68	F8	nao	RGB(142,56,142)			asb3	RGB(0,0,255)	UNKNOWN	SYBR	None
69	F9	nao	RGB(142,56,142)			asb3	RGB(0,0,255)	UNKNOWN	SYBR	None
70	F10
71	F11
72	F12
73	G1	chang	RGB(198,113,113)			18s	RGB(176,23,31)	UNKNOWN	SYBR	None
74	G2	chang	RGB(198,113,113)			18s	RGB(176,23,31)	UNKNOWN	SYBR	None
75	G3	chang	RGB(198,113,113)			18s	RGB(176,23,31)	UNKNOWN	SYBR	None
76	G4
77	G5
78	G6
79	G7	chang	RGB(198,113,113)			asb3	RGB(0,0,255)	UNKNOWN	SYBR	None
80	G8	chang	RGB(198,113,113)			asb3	RGB(0,0,255)	UNKNOWN	SYBR	None
81	G9	chang	RGB(198,113,113)			asb3	RGB(0,0,255)	UNKNOWN	SYBR	None
82	G10
83	G11
84	G12
85	H1	wei	RGB(0,245,255)			18s	RGB(176,23,31)	UNKNOWN	SYBR	None
86	H2	wei	RGB(0,245,255)			18s	RGB(176,23,31)	UNKNOWN	SYBR	None
87	H3	wei	RGB(0,245,255)			18s	RGB(176,23,31)	UNKNOWN	SYBR	None
88	H4
89	H5
90	H6
91	H7	wei	RGB(0,245,255)			asb3	RGB(0,0,255)	UNKNOWN	SYBR	None
92	H8	wei	RGB(0,245,255)			asb3	RGB(0,0,255)	UNKNOWN	SYBR	None
93	H9	wei	RGB(0,245,255)			asb3	RGB(0,0,255)	UNKNOWN	SYBR	None
94	H10
95	H11
96	H12

## Sheet: Amplification Data
Block Type	96-Well 0.2-mL Block
Calibration Background is expired	No
Calibration Background performed on	08-01-2022
Calibration Pure Dye ABY is expired	No
Calibration Pure Dye ABY performed on	08-01-2022
Calibration Pure Dye CY5 is expired	No
Calibration Pure Dye CY5 performed on	08-01-2022
Calibration Pure Dye FAM is expired	No
Calibration Pure Dye FAM performed on	08-01-2022
Calibration Pure Dye JUN is expired	No
Calibration Pure Dye JUN performed on	08-01-2022
Calibration Pure Dye MUSTANG PURPLE is expired	No
Calibration Pure Dye MUSTANG PURPLE performed on	08-01-2022
Calibration Pure Dye NED is expired	No
Calibration Pure Dye NED performed on	08-01-2022
Calibration Pure Dye ROX is expired	No
Calibration Pure Dye ROX performed on	08-01-2022
Calibration Pure Dye SYBR is expired	No
Calibration Pure Dye SYBR performed on	08-01-2022
Calibration Pure Dye TAMRA is expired	No
Calibration Pure Dye TAMRA performed on	08-01-2022
Calibration Pure Dye VIC is expired	No
Calibration Pure Dye VIC performed on	08-01-2022
Calibration ROI is expired	No
Calibration ROI performed on	08-01-2022
Calibration Uniformity is expired	No
Calibration Uniformity performed on	08-01-2022
Chemistry	SYBR_GREEN
Date Created	2023-12-01 04:10:17 AM CST
Experiment Barcode
Experiment Comment
Experiment File Name	D:\datas\huang lab\qxy\2023-12-01_023705.eds
Experiment Name	2023-12-01_023705
Experiment Run End Time	2023-12-01 01:07:46 AM CST
Experiment Type	Standard Curve
Instrument Name	272520824
Instrument Serial Number	272520824
Instrument Type	QuantStudio™ 5 System
Passive Reference	ROX
Post-read Stage/Step
Pre-read Stage/Step
Quantification Cycle Method	Ct
Signal Smoothing On	true
Stage where Melt Analysis is performed	Stage3
Stage/ Cycle where Ct Analysis is performed	Stage2, Step2
User Name
Well	Well Position	Cycle	Target Name	Rn	Delta Rn
1	A1	1	18s	0.587377	-0.100281
1	A1	2	18s	0.613233	-0.0744258
1	A1	3	18s	0.687658	0
1	A1	4	18s	0.781599	0.0939408
1	A1	5	18s	0.926145	0.238486
1	A1	6	18s	1.14863	0.460972
1	A1	7	18s	1.47521	0.787549
1	A1	8	18s	1.89391	1.20625
1	A1	9	18s	2.4323	1.74464
1	A1	10	18s	3.06863	2.38097
1	A1	11	18s	3.74601	3.05836
1	A1	12	18s	4.37862	3.69096
1	A1	13	18s	4.94744	4.25978
1	A1	14	18s	5.41675	4.7291
1	A1	15	18s	5.80888	5.12122
1	A1	16	18s	6.12549	5.43784
1	A1	17	18s	6.3856	5.69794
1	A1	18	18s	6.6065	5.91884
1	A1	19	18s	6.80666	6.119
1	A1	20	18s	6.9646	6.27694
1	A1	21	18s	7.09079	6.40313
1	A1	22	18s	7.16718	6.47952
1	A1	23	18s	7.25977	6.57211
1	A1	24	18s	7.34796	6.6603
1	A1	25	18s	7.40232	6.71466
1	A1	26	18s	7.46886	6.7812
1	A1	27	18s	7.51814	6.83048
1	A1	28	18s	7.56101	6.87335
1	A1	29	18s	7.61295	6.92529
1	A1	30	18s	7.65436	6.9667
1	A1	31	18s	7.68455	6.99689
1	A1	32	18s	7.70806	7.0204
1	A1	33	18s	7.72377	7.03611
1	A1	34	18s	7.75485	7.06719
1	A1	35	18s	7.80336	7.1157
1	A1	36	18s	7.83152	7.14386
1	A1	37	18s	7.83103	7.14337
1	A1	38	18s	7.83195	7.14429
1	A1	39	18s	7.83335	7.14569
1	A1	40	18s	7.85111	7.16345
2	A2	1	18s	0.588928	-0.0872118
2	A2	2	18s	0.613088	-0.0630518
2	A2	3	18s	0.67614	0
2	A2	4	18s	0.769985	0.093845
2	A2	5	18s	0.931807	0.255667
2	A2	6	18s	1.17306	0.496925
2	A2	7	18s	1.51232	0.836176
2	A2	8	18s	1.96101	1.28486
2	A2	9	18s	2.54466	1.86852
2	A2	10	18s	3.22822	2.55208
2	A2	11	18s	3.94822	3.27208
2	A2	12	18s	4.63424	3.9581
2	A2	13	18s	5.27169	4.59555
2	A2	14	18s	5.79383	5.11769
2	A2	15	18s	6.18817	5.51203
2	A2	16	18s	6.54373	5.86759
2	A2	17	18s	6.85503	6.17889
2	A2	18	18s	7.09676	6.42062
2	A2	19	18s	7.28398	6.60784
2	A2	20	18s	7.44242	6.76628
2	A2	21	18s	7.58196	6.90582
2	A2	22	18s	7.68503	7.00889
2	A2	23	18s	7.77869	7.10255
2	A2	24	18s	7.86414	7.188
2	A2	25	18s	7.9287	7.25256
2	A2	26	18s	8.01135	7.33521
2	A2	27	18s	8.07042	7.39428
2	A2	28	18s	8.13956	7.46342
2	A2	29	18s	8.1962	7.52006
2	A2	30	18s	8.21925	7.54311
2	A2	31	18s	8.25171	7.57557
2	A2	32	18s	8.28525	7.60911
2	A2	33	18s	8.29471	7.61857
2	A2	34	18s	8.3285	7.65236
2	A2	35	18s	8.35233	7.67619
2	A2	36	18s	8.3777	7.70156
2	A2	37	18s	8.40918	7.73304
2	A2	38	18s	8.42746	7.75132
2	A2	39	18s	8.4245	7.74836
2	A2	40	18s	8.44026	7.76412
3	A3	1	18s	0.538652	-0.0910228
3	A3	2	18s	0.563255	-0.0664195
3	A3	3	18s	0.629675	0
3	A3	4	18s	0.721938	0.0922635
3	A3	5	18s	0.875282	0.245607
3	A3	6	18s	1.10372	0.474047
3	A3	7	18s	1.42307	0.793398
3	A3	8	18s	1.85026	1.22059
3	A3	9	18s	2.39919	1.76952
3	A3	10	18s	3.04879	2.41912
3	A3	11	18s	3.73842	3.10874
3	A3	12	18s	4.40125	3.77158
3	A3	13	18s	5.00853	4.37886
3	A3	14	18s	5.54313	4.91345
3	A3	15	18s	5.99022	5.36055
3	A3	16	18s	6.34474	5.71507
3	A3	17	18s	6.65572	6.02604
3	A3	18	18s	6.92458	6.29491
3	A3	19	18s	7.14709	6.51742
3	A3	20	18s	7.31698	6.68731
3	A3	21	18s	7.45768	6.828
3	A3	22	18s	7.58202	6.95234
3	A3	23	18s	7.69203	7.06236
3	A3	24	18s	7.79294	7.16326
3	A3	25	18s	7.85815	7.22848
3	A3	26	18s	7.93456	7.30489
3	A3	27	18s	8.01327	7.38359
3	A3	28	18s	8.07964	7.44997
3	A3	29	18s	8.14113	7.51145
3	A3	30	18s	8.18882	7.55915
3	A3	31	18s	8.2164	7.58673
3	A3	32	18s	8.25708	7.6274
3	A3	33	18s	8.29825	7.66858
3	A3	34	18s	8.33799	7.70832
3	A3	35	18s	8.35438	7.72471
3	A3	36	18s	8.38109	7.75142
3	A3	37	18s	8.4071	7.77743
3	A3	38	18s	8.43012	7.80045
3	A3	39	18s	8.45489	7.82521
3	A3	40	18s	8.47937	7.8497
4	A4	1	18s	0.700601	-0.154196
4	A4	2	18s	0.740972	-0.113825
4	A4	3	18s	0.854796	0
4	A4	4	18s	1.01109	0.156293
4	A4	5	18s	1.2592	0.404399
4	A4	6	18s	1.6201	0.765304
4	A4	7	18s	2.08734	1.23255
4	A4	8	18s	2.67888	1.82408
4	A4	9	18s	3.37869	2.52389
4	A4	10	18s	4.10633	3.25153
4	A4	11	18s	4.80411	3.94932
4	A4	12	18s	5.41433	4.55953
4	A4	13	18s	5.93116	5.07636
4	A4	14	18s	6.36649	5.51169
4	A4	15	18s	6.71646	5.86167
4	A4	16	18s	6.98635	6.13156
4	A4	17	18s	7.22954	6.37474
4	A4	18	18s	7.43004	6.57524
4	A4	19	18s	7.59796	6.74316
4	A4	20	18s	7.73037	6.87557
4	A4	21	18s	7.83085	6.97605
4	A4	22	18s	7.90326	7.04847
4	A4	23	18s	7.99433	7.13953
4	A4	24	18s	8.07969	7.22489
4	A4	25	18s	8.12777	7.27297
4	A4	26	18s	8.19549	7.34069
4	A4	27	18s	8.25274	7.39794
4	A4	28	18s	8.28721	7.43241
4	A4	29	18s	8.33033	7.47554
4	A4	30	18s	8.36494	7.51014
4	A4	31	18s	8.39038	7.53559
4	A4	32	18s	8.42315	7.56835
4	A4	33	18s	8.45221	7.59741
4	A4	34	18s	8.47393	7.61913
4	A4	35	18s	8.48926	7.63447
4	A4	36	18s	8.50982	7.65502
4	A4	37	18s	8.53671	7.68191
4	A4	38	18s	8.54945	7.69465
4	A4	39	18s	8.56744	7.71264
4	A4	40	18s	8.56205	7.70726
5	A5	1	18s	0.64751	-0.14533
5	A5	2	18s	0.686752	-0.106088
5	A5	3	18s	0.79284	0
5	A5	4	18s	0.948611	0.155771
5	A5	5	18s	1.19193	0.399088
5	A5	6	18s	1.53051	0.737672
5	A5	7	18s	1.98123	1.18839
5	A5	8	18s	2.55	1.75716
5	A5	9	18s	3.23081	2.43797
5	A5	10	18s	3.95882	3.16598
5	A5	11	18s	4.66496	3.87212
5	A5	12	18s	5.29093	4.49809
5	A5	13	18s	5.82873	5.03589
5	A5	14	18s	6.272	5.47916
5	A5	15	18s	6.61506	5.82223
5	A5	16	18s	6.90429	6.11145
5	A5	17	18s	7.15066	6.35783
5	A5	18	18s	7.3555	6.56266
5	A5	19	18s	7.52578	6.73294
5	A5	20	18s	7.67355	6.88071
5	A5	21	18s	7.79761	7.00477
5	A5	22	18s	7.89488	7.10204
5	A5	23	18s	7.97154	7.1787
5	A5	24	18s	8.04894	7.2561
5	A5	25	18s	8.11114	7.3183
5	A5	26	18s	8.16797	7.37513
5	A5	27	18s	8.24061	7.44777
5	A5	28	18s	8.29261	7.49977
5	A5	29	18s	8.33662	7.54378
5	A5	30	18s	8.37753	7.58469
5	A5	31	18s	8.41015	7.61731
5	A5	32	18s	8.4368	7.64396
5	A5	33	18s	8.44893	7.65609
5	A5	34	18s	8.48064	7.6878
5	A5	35	18s	8.4965	7.70366
5	A5	36	18s	8.52217	7.72933
5	A5	37	18s	8.54012	7.74729
5	A5	38	18s	8.56269	7.76985
5	A5	39	18s	8.58079	7.78795
5	A5	40	18s	8.59647	7.80363
6	A6	1	18s	0.658336	-0.134588
6	A6	2	18s	0.693567	-0.0993564
6	A6	3	18s	0.792924	0
6	A6	4	18s	0.936437	0.143513
6	A6	5	18s	1.15222	0.359295
6	A6	6	18s	1.44879	0.655864
6	A6	7	18s	1.84784	1.05492
6	A6	8	18s	2.35599	1.56307
6	A6	9	18s	2.96368	2.17076
6	A6	10	18s	3.59945	2.80652
6	A6	11	18s	4.21033	3.41741
6	A6	12	18s	4.75685	3.96393
6	A6	13	18s	5.23816	4.44524
6	A6	14	18s	5.63768	4.84476
6	A6	15	18s	5.98498	5.19206
6	A6	16	18s	6.26361	5.47069
6	A6	17	18s	6.49336	5.70043
6	A6	18	18s	6.69918	5.90625
6	A6	19	18s	6.86825	6.07533
6	A6	20	18s	7.01654	6.22362
6	A6	21	18s	7.12826	6.33534
6	A6	22	18s	7.24735	6.45443
6	A6	23	18s	7.34349	6.55057
6	A6	24	18s	7.39416	6.60123
6	A6	25	18s	7.46129	6.66837
6	A6	26	18s	7.52911	6.73618
6	A6	27	18s	7.60409	6.81117
6	A6	28	18s	7.65927	6.86635
6	A6	29	18s	7.67574	6.88281
6	A6	30	18s	7.71099	6.91806
6	A6	31	18s	7.73517	6.94224
6	A6	32	18s	7.7804	6.98748
6	A6	33	18s	7.83909	7.04616
6	A6	34	18s	7.8705	7.07758
6	A6	35	18s	7.87156	7.07864
6	A6	36	18s	7.89122	7.0983
6	A6	37	18s	7.91444	7.12151
6	A6	38	18s	7.93588	7.14296
6	A6	39	18s	7.94822	7.15529
6	A6	40	18s	7.96592	7.173
7	A7	1	asb3	0.571967	-0.0412874
7	A7	2	asb3	0.58815	-0.0298025
7	A7	3	asb3	0.615051	-0.00760099
7	A7	4	asb3	0.62976	0.002409
7	A7	5	asb3	0.632831	0.000781657
7	A7	6	asb3	0.634118	-0.00263084
7	A7	7	asb3	0.644354	0.00290582
7	A7	8	asb3	0.650936	0.00478907
7	A7	9	asb3	0.655824	0.00497878
7	A7	10	asb3	0.657262	0.00171756
7	A7	11	asb3	0.660501	0.00025753
7	A7	12	asb3	0.66069	-0.00425205
7	A7	13	asb3	0.666174	-0.00346707
7	A7	14	asb3	0.673835	-0.000504915
7	A7	15	asb3	0.681483	0.00244389
7	A7	16	asb3	0.684592	0.000853626
7	A7	17	asb3	0.685756	-0.00268106
7	A7	18	asb3	0.697494	0.00435811
7	A7	19	asb3	0.715905	0.0180701
7	A7	20	asb3	0.736774	0.0342398
7	A7	21	asb3	0.778914	0.0716813
7	A7	22	asb3	0.864892	0.15296
7	A7	23	asb3	1.01834	0.301707
7	A7	24	asb3	1.26164	0.540313
7	A7	25	asb3	1.58776	0.861734
7	A7	26	asb3	2.02123	1.2905
7	A7	27	asb3	2.57605	1.84062
7	A7	28	asb3	3.24247	2.50234
7	A7	29	asb3	3.98103	3.23621
7	A7	30	asb3	4.71391	3.96439
7	A7	31	asb3	5.37378	4.61956
7	A7	32	asb3	5.93476	5.17584
7	A7	33	asb3	6.41663	5.65301
7	A7	34	asb3	6.82287	6.05455
7	A7	35	asb3	7.14295	6.36993
7	A7	36	asb3	7.40224	6.62452
7	A7	37	asb3	7.61045	6.82804
7	A7	38	asb3	7.8032	7.01608
7	A7	39	asb3	7.96763	7.17582
7	A7	40	asb3	8.08354	7.28702
8	A8	1	asb3	1.83825	-0.0508009
8	A8	2	asb3	1.85815	-0.0481332
8	A8	3	asb3	1.8937	-0.0298054
8	A8	4	asb3	1.92945	-0.0112853
8	A8	5	asb3	1.9553	-0.00265948
8	A8	6	asb3	1.98182	0.00663466
8	A8	7	asb3	2.00098	0.0085612
8	A8	8	asb3	2.01718	0.00753981
8	A8	9	asb3	2.03686	0.0099874
8	A8	10	asb3	2.05803	0.0139392
8	A8	11	asb3	2.074	0.0126758
8	A8	12	asb3	2.0913	0.0127559
8	A8	13	asb3	2.10528	0.00950481
8	A8	14	asb3	2.11857	0.00556446
8	A8	15	asb3	2.12581	-0.00441742
8	A8	16	asb3	2.13681	-0.0106478
8	A8	17	asb3	2.15324	-0.0114377
8	A8	18	asb3	2.165	-0.0169101
8	A8	19	asb3	2.18357	-0.01557
8	A8	20	asb3	2.21099	-0.00536755
8	A8	21	asb3	2.25284	0.0192546
8	A8	22	asb3	2.3197	0.0688853
8	A8	23	asb3	2.44826	0.180219
8	A8	24	asb3	2.64391	0.358641
8	A8	25	asb3	2.90911	0.606611
8	A8	26	asb3	3.26083	0.941107
8	A8	27	asb3	3.68989	1.35294
8	A8	28	asb3	4.17983	1.82565
8	A8	29	asb3	4.69747	2.32606
8	A8	30	asb3	5.1993	2.81067
8	A8	31	asb3	5.63351	3.22765
8	A8	32	asb3	5.98151	3.55842
8	A8	33	asb3	6.2803	3.83999
8	A8	34	asb3	6.54608	4.08854
8	A8	35	asb3	6.75277	4.27801
8	A8	36	asb3	6.89698	4.40499
8	A8	37	asb3	7.04174	4.53253
8	A8	38	asb3	7.17479	4.64834
8	A8	39	asb3	7.29199	4.74832
8	A8	40	asb3	7.38153	4.82063
9	A9	1	asb3	0.510329	-0.0366272
9	A9	2	asb3	0.522863	-0.0287327
9	A9	3	asb3	0.547498	-0.00873648
9	A9	4	asb3	0.556621	-0.00425163
9	A9	5	asb3	0.566242	0.000730216
9	A9	6	asb3	0.574835	0.00468471
9	A9	7	asb3	0.582657	0.00786721
9	A9	8	asb3	0.585995	0.00656624
9	A9	9	asb3	0.585653	0.00158511
9	A9	10	asb3	0.587626	-0.0010805
9	A9	11	asb3	0.593744	0.000399088
9	A9	12	asb3	0.597301	-0.000683127
9	A9	13	asb3	0.602134	-0.00048885
9	A9	14	asb3	0.60422	-0.00304211
9	A9	15	asb3	0.608523	-0.00337766
9	A9	16	asb3	0.613216	-0.00332381
9	A9	17	asb3	0.620914	-0.000264634
9	A9	18	asb3	0.629234	0.00341622
9	A9	19	asb3	0.642793	0.012337
9	A9	20	asb3	0.669745	0.0346494
9	A9	21	asb3	0.714693	0.0749586
9	A9	22	asb3	0.799261	0.154888
9	A9	23	asb3	0.953143	0.304132
9	A9	24	asb3	1.20061	0.546956
9	A9	25	asb3	1.53054	0.872246
9	A9	26	asb3	1.96138	1.29845
9	A9	27	asb3	2.51079	1.84322
9	A9	28	asb3	3.19156	2.51935
9	A9	29	asb3	3.94551	3.26867
9	A9	30	asb3	4.67735	3.99587
9	A9	31	asb3	5.35099	4.66487
9	A9	32	asb3	5.93712	5.24636
9	A9	33	asb3	6.40628	5.71088
9	A9	34	asb3	6.80126	6.10122
9	A9	35	asb3	7.12458	6.4199
9	A9	36	asb3	7.41812	6.7088
9	A9	37	asb3	7.64104	6.92708
9	A9	38	asb3	7.81084	7.09224
9	A9	39	asb3	7.95518	7.23195
9	A9	40	asb3	8.07326	7.34538
10	A10	1	asb3	0.593025	-0.0587611
10	A10	2	asb3	0.618142	-0.0424643
10	A10	3	asb3	0.654557	-0.0148701
10	A10	4	asb3	0.674238	-0.00400926
10	A10	5	asb3	0.686972	-9.55314e-05
10	A10	6	asb3	0.697841	0.00195293
10	A10	7	asb3	0.712114	0.00740642
10	A10	8	asb3	0.722633	0.00910499
10	A10	9	asb3	0.730213	0.00786441
10	A10	10	asb3	0.736003	0.00483455
10	A10	11	asb3	0.743569	0.00358055
10	A10	12	asb3	0.746499	-0.00230997
10	A10	13	asb3	0.756956	-0.000673862
10	A10	14	asb3	0.766237	-0.000212736
10	A10	15	asb3	0.767876	-0.00739358
10	A10	16	asb3	0.779478	-0.00461235
10	A10	17	asb3	0.792344	-0.000566417
10	A10	18	asb3	0.8034	0.00166938
10	A10	19	asb3	0.826998	0.0164465
10	A10	20	asb3	0.878962	0.0595908
10	A10	21	asb3	0.976236	0.148044
10	A10	22	asb3	1.14113	0.304116
10	A10	23	asb3	1.40054	0.554707
10	A10	24	asb3	1.7529	0.898248
10	A10	25	asb3	2.20673	1.34326
10	A10	26	asb3	2.79287	1.92058
10	A10	27	asb3	3.46534	2.58422
10	A10	28	asb3	4.19065	3.30071
10	A10	29	asb3	4.88906	3.99031
10	A10	30	asb3	5.50042	4.59285
10	A10	31	asb3	6.03692	5.12053
10	A10	32	asb3	6.48807	5.56285
10	A10	33	asb3	6.8497	5.91566
10	A10	34	asb3	7.1209	6.17804
10	A10	35	asb3	7.36217	6.41049
10	A10	36	asb3	7.5569	6.5964
10	A10	37	asb3	7.70126	6.73194
10	A10	38	asb3	7.82755	6.84941
10	A10	39	asb3	7.95074	6.96378
10	A10	40	asb3	8.03425	7.03847
11	A11	1	asb3	0.587802	-0.0622778
11	A11	2	asb3	0.611958	-0.0467715
11	A11	3	asb3	0.649465	-0.0179143
11	A11	4	asb3	0.674867	-0.00116065
11	A11	5	asb3	0.689869	0.00519156
11	A11	6	asb3	0.69803	0.00470306
11	A11	7	asb3	0.706777	0.00480131
11	A11	8	asb3	0.715121	0.00449628
11	A11	9	asb3	0.723785	0.00451091
11	A11	10	asb3	0.732109	0.00418489
11	A11	11	asb3	0.735164	-0.00140904
11	A11	12	asb3	0.747416	0.00219397
11	A11	13	asb3	0.758192	0.00432086
11	A11	14	asb3	0.761406	-0.00111428
11	A11	15	asb3	0.764811	-0.00635887
11	A11	16	asb3	0.774076	-0.00574337
11	A11	17	asb3	0.787766	-0.00070234
11	A11	18	asb3	0.803518	0.00640053
11	A11	19	asb3	0.82946	0.0236931
11	A11	20	asb3	0.878503	0.0640868
11	A11	21	asb3	0.972739	0.149673
11	A11	22	asb3	1.13308	0.301362
11	A11	23	asb3	1.39404	0.553671
11	A11	24	asb3	1.75535	0.906337
11	A11	25	asb3	2.20952	1.35185
11	A11	26	asb3	2.80362	1.9373
11	A11	27	asb3	3.51007	2.63511
11	A11	28	asb3	4.25577	3.37216
11	A11	29	asb3	4.97818	4.08592
11	A11	30	asb3	5.61796	4.71705
11	A11	31	asb3	6.15628	5.24673
11	A11	32	asb3	6.59298	5.67477
11	A11	33	asb3	6.93853	6.01167
11	A11	34	asb3	7.2165	6.281
11	A11	35	asb3	7.44901	6.50485
11	A11	36	asb3	7.6276	6.6748
11	A11	37	asb3	7.80479	6.84334
11	A11	38	asb3	7.93629	6.96618
11	A11	39	asb3	8.0345	7.05575
11	A11	40	asb3	8.12626	7.13886
12	A12	1	asb3	0.601986	-0.0588446
12	A12	2	asb3	0.624101	-0.0456585
12	A12	3	asb3	0.65743	-0.0212595
12	A12	4	asb3	0.677727	-0.00989203
12	A12	5	asb3	0.701133	0.00458425
12	A12	6	asb3	0.715784	0.0103059
12	A12	7	asb3	0.724	0.00959261
12	A12	8	asb3	0.731912	0.00857467
12	A12	9	asb3	0.740731	0.00846486
12	A12	10	asb3	0.744913	0.00371733
12	A12	11	asb3	0.755609	0.0054834
12	A12	12	asb3	0.757031	-0.002024
12	A12	13	asb3	0.76399	-0.00399419
12	A12	14	asb3	0.777102	0.000188312
12	A12	15	asb3	0.783231	-0.00261199
12	A12	16	asb3	0.783643	-0.0111296
12	A12	17	asb3	0.795475	-0.0082275
12	A12	18	asb3	0.813691	0.00105913
12	A12	19	asb3	0.841793	0.0202314
12	A12	20	asb3	0.891098	0.0606066
12	A12	21	asb3	0.983648	0.144227
12	A12	22	asb3	1.1441	0.295746
12	A12	23	asb3	1.39113	0.533852
12	A12	24	asb3	1.74374	0.87753
12	A12	25	asb3	2.20214	1.327
12	A12	26	asb3	2.79701	1.91294
12	A12	27	asb3	3.50027	2.60727
12	A12	28	asb3	4.24029	3.33836
12	A12	29	asb3	4.94815	4.03729
12	A12	30	asb3	5.55245	4.63266
12	A12	31	asb3	6.05266	5.12395
12	A12	32	asb3	6.45173	5.51409
12	A12	33	asb3	6.78069	5.83412
12	A12	34	asb3	7.043	6.0875
12	A12	35	asb3	7.25534	6.29091
12	A12	36	asb3	7.42242	6.44906
12	A12	37	asb3	7.55339	6.5711
12	A12	38	asb3	7.6746	6.68338
12	A12	39	asb3	7.80634	6.80619
12	A12	40	asb3	7.88975	6.88067
13	B1	1	18s	0.49964	-0.0622759
13	B1	2	18s	0.517015	-0.0449017
13	B1	3	18s	0.561916	0
13	B1	4	18s	0.628474	0.0665574
13	B1	5	18s	0.742225	0.180309
13	B1	6	18s	0.938197	0.37628
13	B1	7	18s	1.2363	0.674379
13	B1	8	18s	1.63006	1.06814
13	B1	9	18s	2.14514	1.58323
13	B1	10	18s	2.78791	2.22599
13	B1	11	18s	3.4885	2.92658
13	B1	12	18s	4.17238	3.61046
13	B1	13	18s	4.78723	4.22532
13	B1	14	18s	5.31723	4.75531
13	B1	15	18s	5.76469	5.20277
13	B1	16	18s	6.13018	5.56826
13	B1	17	18s	6.42485	5.86293
13	B1	18	18s	6.65174	6.08982
13	B1	19	18s	6.84902	6.2871
13	B1	20	18s	7.02304	6.46112
13	B1	21	18s	7.15689	6.59498
13	B1	22	18s	7.27299	6.71108
13	B1	23	18s	7.35099	6.78907
13	B1	24	18s	7.433	6.87109
13	B1	25	18s	7.49946	6.93754
13	B1	26	18s	7.56166	6.99974
13	B1	27	18s	7.62849	7.06657
13	B1	28	18s	7.67984	7.11792
13	B1	29	18s	7.72552	7.1636
13	B1	30	18s	7.75577	7.19385
13	B1	31	18s	7.79694	7.23502
13	B1	32	18s	7.8325	7.27059
13	B1	33	18s	7.84923	7.28732
13	B1	34	18s	7.87876	7.31685
13	B1	35	18s	7.90558	7.34366
13	B1	36	18s	7.91355	7.35164
13	B1	37	18s	7.9314	7.36948
13	B1	38	18s	7.9355	7.37358
13	B1	39	18s	7.9396	7.37769
13	B1	40	18s	7.9543	7.39239
14	B2	1	18s	0.523013	-0.0585633
14	B2	2	18s	0.539028	-0.0425485
14	B2	3	18s	0.581576	0
14	B2	4	18s	0.64962	0.0680434
14	B2	5	18s	0.772368	0.190792
14	B2	6	18s	0.969979	0.388402
14	B2	7	18s	1.25821	0.676636
14	B2	8	18s	1.65126	1.06968
14	B2	9	18s	2.16895	1.58737
14	B2	10	18s	2.81595	2.23438
14	B2	11	18s	3.53049	2.94891
14	B2	12	18s	4.24053	3.65896
14	B2	13	18s	4.89684	4.31527
14	B2	14	18s	5.47103	4.88946
14	B2	15	18s	5.94022	5.35865
14	B2	16	18s	6.36228	5.7807
14	B2	17	18s	6.70391	6.12233
14	B2	18	18s	6.96935	6.38777
14	B2	19	18s	7.19746	6.61588
14	B2	20	18s	7.37524	6.79367
14	B2	21	18s	7.53649	6.95491
14	B2	22	18s	7.6756	7.09403
14	B2	23	18s	7.78765	7.20607
14	B2	24	18s	7.8888	7.30722
14	B2	25	18s	7.97016	7.38858
14	B2	26	18s	8.03729	7.45572
14	B2	27	18s	8.10636	7.52478
14	B2	28	18s	8.15916	7.57758
14	B2	29	18s	8.19666	7.61508
14	B2	30	18s	8.2487	7.66712
14	B2	31	18s	8.3037	7.72212
14	B2	32	18s	8.34177	7.76019
14	B2	33	18s	8.36064	7.77907
14	B2	34	18s	8.38276	7.80118
14	B2	35	18s	8.40457	7.823
14	B2	36	18s	8.43811	7.85653
14	B2	37	18s	8.46457	7.883
14	B2	38	18s	8.48464	7.90306
14	B2	39	18s	8.50297	7.9214
14	B2	40	18s	8.49623	7.91465
15	B3	1	18s	0.503819	-0.0624132
15	B3	2	18s	0.522387	-0.0438452
15	B3	3	18s	0.566233	0
15	B3	4	18s	0.638617	0.0723842
15	B3	5	18s	0.761022	0.194789
15	B3	6	18s	0.947112	0.380879
15	B3	7	18s	1.21713	0.6509
15	B3	8	18s	1.58523	1.019
15	B3	9	18s	2.0734	1.50716
15	B3	10	18s	2.68619	2.11995
15	B3	11	18s	3.36005	2.79381
15	B3	12	18s	4.03465	3.46841
15	B3	13	18s	4.67338	4.10715
15	B3	14	18s	5.25045	4.68422
15	B3	15	18s	5.74056	5.17432
15	B3	16	18s	6.17198	5.60575
15	B3	17	18s	6.5316	5.96537
15	B3	18	18s	6.83134	6.2651
15	B3	19	18s	7.07841	6.51218
15	B3	20	18s	7.27624	6.71001
15	B3	21	18s	7.43524	6.86901
15	B3	22	18s	7.57969	7.01346
15	B3	23	18s	7.69189	7.12565
15	B3	24	18s	7.81693	7.2507
15	B3	25	18s	7.91797	7.35174
15	B3	26	18s	7.99322	7.42699
15	B3	27	18s	8.05771	7.49147
15	B3	28	18s	8.13268	7.56645
15	B3	29	18s	8.20582	7.63959
15	B3	30	18s	8.25552	7.68929
15	B3	31	18s	8.30202	7.73579
15	B3	32	18s	8.3519	7.78566
15	B3	33	18s	8.38122	7.81499
15	B3	34	18s	8.4183	7.85207
15	B3	35	18s	8.44218	7.87595
15	B3	36	18s	8.47488	7.90864
15	B3	37	18s	8.49805	7.93182
15	B3	38	18s	8.51534	7.94911
15	B3	39	18s	8.52513	7.95889
15	B3	40	18s	8.54664	7.98041
16	B4	1	18s	0.704724	-0.152511
16	B4	2	18s	0.749779	-0.107455
16	B4	3	18s	0.857234	0
16	B4	4	18s	1.01229	0.155053
16	B4	5	18s	1.25699	0.399756
16	B4	6	18s	1.60218	0.744943
16	B4	7	18s	2.06242	1.20519
16	B4	8	18s	2.6484	1.79116
16	B4	9	18s	3.35885	2.50161
16	B4	10	18s	4.11418	3.25694
16	B4	11	18s	4.82786	3.97063
16	B4	12	18s	5.46615	4.60892
16	B4	13	18s	6.00931	5.15207
16	B4	14	18s	6.46554	5.6083
16	B4	15	18s	6.83189	5.97466
16	B4	16	18s	7.12789	6.27066
16	B4	17	18s	7.38379	6.52656
16	B4	18	18s	7.58993	6.73269
16	B4	19	18s	7.75775	6.90051
16	B4	20	18s	7.90094	7.0437
16	B4	21	18s	8.04718	7.18995
16	B4	22	18s	8.15854	7.3013
16	B4	23	18s	8.23406	7.37683
16	B4	24	18s	8.30715	7.44991
16	B4	25	18s	8.36611	7.50887
16	B4	26	18s	8.42998	7.57275
16	B4	27	18s	8.47943	7.6222
16	B4	28	18s	8.52908	7.67184
16	B4	29	18s	8.5825	7.72526
16	B4	30	18s	8.6178	7.76057
16	B4	31	18s	8.63819	7.78096
16	B4	32	18s	8.6842	7.82696
16	B4	33	18s	8.7161	7.85886
16	B4	34	18s	8.72378	7.86654
16	B4	35	18s	8.74074	7.8835
16	B4	36	18s	8.76292	7.90568
16	B4	37	18s	8.77034	7.91311
16	B4	38	18s	8.79384	7.93661
16	B4	39	18s	8.81487	7.95763
16	B4	40	18s	8.83101	7.97377
17	B5	1	18s	0.649126	-0.154998
17	B5	2	18s	0.692826	-0.111298
17	B5	3	18s	0.804124	0
17	B5	4	18s	0.965746	0.161622
17	B5	5	18s	1.21279	0.408661
17	B5	6	18s	1.56366	0.759535
17	B5	7	18s	2.00845	1.20433
17	B5	8	18s	2.58105	1.77693
17	B5	9	18s	3.27318	2.46905
17	B5	10	18s	4.01016	3.20603
17	B5	11	18s	4.72436	3.92023
17	B5	12	18s	5.37508	4.57096
17	B5	13	18s	5.95322	5.14909
17	B5	14	18s	6.43922	5.63509
17	B5	15	18s	6.81964	6.01552
17	B5	16	18s	7.15785	6.35373
17	B5	17	18s	7.43513	6.63101
17	B5	18	18s	7.64986	6.84574
17	B5	19	18s	7.84605	7.04193
17	B5	20	18s	8.00666	7.20253
17	B5	21	18s	8.14181	7.33769
17	B5	22	18s	8.25038	7.44626
17	B5	23	18s	8.33779	7.53367
17	B5	24	18s	8.42003	7.6159
17	B5	25	18s	8.49144	7.68732
17	B5	26	18s	8.56312	7.759
17	B5	27	18s	8.62707	7.82295
17	B5	28	18s	8.68808	7.88395
17	B5	29	18s	8.7392	7.93508
17	B5	30	18s	8.778	7.97388
17	B5	31	18s	8.81286	8.00874
17	B5	32	18s	8.85695	8.05283
17	B5	33	18s	8.89378	8.08965
17	B5	34	18s	8.92782	8.12369
17	B5	35	18s	8.94963	8.1455
17	B5	36	18s	8.95789	8.15376
17	B5	37	18s	8.98578	8.18165
17	B5	38	18s	9.00215	8.19802
17	B5	39	18s	9.01035	8.20622
17	B5	40	18s	9.02816	8.22404
18	B6	1	18s	0.682861	-0.158292
18	B6	2	18s	0.731166	-0.109986
18	B6	3	18s	0.841153	0
18	B6	4	18s	1.00071	0.159562
18	B6	5	18s	1.25242	0.411272
18	B6	6	18s	1.60699	0.765837
18	B6	7	18s	2.0834	1.24225
18	B6	8	18s	2.69265	1.8515
18	B6	9	18s	3.41672	2.57557
18	B6	10	18s	4.20297	3.36182
18	B6	11	18s	4.95179	4.11063
18	B6	12	18s	5.61235	4.77119
18	B6	13	18s	6.18882	5.34767
18	B6	14	18s	6.67807	5.83692
18	B6	15	18s	7.08118	6.24002
18	B6	16	18s	7.41656	6.57541
18	B6	17	18s	7.68165	6.8405
18	B6	18	18s	7.9044	7.06325
18	B6	19	18s	8.08846	7.24731
18	B6	20	18s	8.22301	7.38186
18	B6	21	18s	8.3577	7.51655
18	B6	22	18s	8.50296	7.66181
18	B6	23	18s	8.59976	7.75861
18	B6	24	18s	8.6757	7.83455
18	B6	25	18s	8.77578	7.93463
18	B6	26	18s	8.84398	8.00282
18	B6	27	18s	8.87113	8.02998
18	B6	28	18s	8.90723	8.06607
18	B6	29	18s	8.94828	8.10713
18	B6	30	18s	8.99175	8.15059
18	B6	31	18s	9.03673	8.19558
18	B6	32	18s	9.09928	8.25813
18	B6	33	18s	9.13102	8.28987
18	B6	34	18s	9.14861	8.30746
18	B6	35	18s	9.16239	8.32123
18	B6	36	18s	9.1754	8.33424
18	B6	37	18s	9.1973	8.35615
18	B6	38	18s	9.19199	8.35084
18	B6	39	18s	9.23085	8.3897
18	B6	40	18s	9.25218	8.41102
19	B7	1	asb3	0.443626	-0.0262654
19	B7	2	asb3	0.455245	-0.0185783
19	B7	3	asb3	0.471271	-0.00648429
19	B7	4	asb3	0.480994	-0.000693405
19	B7	5	asb3	0.485213	-0.000406266
19	B7	6	asb3	0.48968	0.000129097
19	B7	7	asb3	0.496598	0.00311487
19	B7	8	asb3	0.502598	0.00518293
19	B7	9	asb3	0.502615	0.00126801
19	B7	10	asb3	0.50533	5.10221e-05
19	B7	11	asb3	0.511535	0.00232443
19	B7	12	asb3	0.518149	0.00500606
19	B7	13	asb3	0.517803	0.000728441
19	B7	14	asb3	0.51814	-0.00286677
19	B7	15	asb3	0.519725	-0.00521403
19	B7	16	asb3	0.526008	-0.00286296
19	B7	17	asb3	0.531143	-0.00165922
19	B7	18	asb3	0.536453	-0.000281976
19	B7	19	asb3	0.543331	0.00266407
19	B7	20	asb3	0.547715	0.00311637
19	B7	21	asb3	0.568104	0.0195734
19	B7	22	asb3	0.61284	0.0603777
19	B7	23	asb3	0.687685	0.131291
19	B7	24	asb3	0.831241	0.270915
19	B7	25	asb3	1.07293	0.508668
19	B7	26	asb3	1.40921	0.84102
19	B7	27	asb3	1.85113	1.279
19	B7	28	asb3	2.42135	1.8453
19	B7	29	asb3	3.13324	2.55325
19	B7	30	asb3	3.91749	3.33357
19	B7	31	asb3	4.68803	4.10018
19	B7	32	asb3	5.3926	4.80082
19	B7	33	asb3	6.01493	5.41921
19	B7	34	asb3	6.53019	5.93055
19	B7	35	asb3	6.93771	6.33413
19	B7	36	asb3	7.27564	6.66813
19	B7	37	asb3	7.55858	6.94714
19	B7	38	asb3	7.76899	7.15362
19	B7	39	asb3	7.93619	7.31689
19	B7	40	asb3	8.07839	7.45515
20	B8	1	asb3	0.481772	-0.023794
20	B8	2	asb3	0.490586	-0.0182363
20	B8	3	asb3	0.504199	-0.00788075
20	B8	4	asb3	0.512839	-0.00249808
20	B8	5	asb3	0.515983	-0.00261097
20	B8	6	asb3	0.526757	0.00490596
20	B8	7	asb3	0.531353	0.00624493
20	B8	8	asb3	0.535848	0.00748233
20	B8	9	asb3	0.534101	0.00247799
20	B8	10	asb3	0.533668	-0.00121242
20	B8	11	asb3	0.537946	-0.000191268
20	B8	12	asb3	0.541518	0.000123572
20	B8	13	asb3	0.543679	-0.000972669
20	B8	14	asb3	0.545472	-0.00243631
20	B8	15	asb3	0.551051	-0.000114405
20	B8	16	asb3	0.551666	-0.00275697
20	B8	17	asb3	0.554434	-0.00324649
20	B8	18	asb3	0.560068	-0.000869393
20	B8	19	asb3	0.567749	0.00355495
20	B8	20	asb3	0.578638	0.0111864
20	B8	21	asb3	0.601024	0.0303156
20	B8	22	asb3	0.648217	0.0742512
20	B8	23	asb3	0.730922	0.153699
20	B8	24	asb3	0.881931	0.301451
20	B8	25	asb3	1.13774	0.554006
20	B8	26	asb3	1.49415	0.907156
20	B8	27	asb3	1.96352	1.37327
20	B8	28	asb3	2.56422	1.97071
20	B8	29	asb3	3.32406	2.72729
20	B8	30	asb3	4.15222	3.5522
20	B8	31	asb3	4.96781	4.36453
20	B8	32	asb3	5.70274	5.0962
20	B8	33	asb3	6.313	5.70321
20	B8	34	asb3	6.82335	6.2103
20	B8	35	asb3	7.23503	6.61872
20	B8	36	asb3	7.57549	6.95593
20	B8	37	asb3	7.83535	7.21253
20	B8	38	asb3	8.04193	7.41585
20	B8	39	asb3	8.21727	7.58793
20	B8	40	asb3	8.33551	7.70292
21	B9	1	asb3	0.435245	-0.0219435
21	B9	2	asb3	0.444384	-0.0158139
21	B9	3	asb3	0.454745	-0.0084617
21	B9	4	asb3	0.466519	0.000303891
21	B9	5	asb3	0.474407	0.00518305
21	B9	6	asb3	0.473877	0.0016434
21	B9	7	asb3	0.477118	0.00187578
21	B9	8	asb3	0.48122	0.00296924
21	B9	9	asb3	0.480291	-0.000969635
21	B9	10	asb3	0.484878	0.000608765
21	B9	11	asb3	0.487488	0.000210257
21	B9	12	asb3	0.491224	0.000936907
21	B9	13	asb3	0.496894	0.00359776
21	B9	14	asb3	0.494754	-0.00155139
21	B9	15	asb3	0.492789	-0.00652482
21	B9	16	asb3	0.49789	-0.00443245
21	B9	17	asb3	0.506401	0.00106904
21	B9	18	asb3	0.509478	0.00113688
21	B9	19	asb3	0.513755	0.00240503
21	B9	20	asb3	0.526055	0.0116961
21	B9	21	asb3	0.551137	0.0337694
21	B9	22	asb3	0.589777	0.0694006
21	B9	23	asb3	0.665247	0.141862
21	B9	24	asb3	0.81026	0.283865
21	B9	25	asb3	1.04875	0.519342
21	B9	26	asb3	1.38858	0.856164
21	B9	27	asb3	1.83011	1.29468
21	B9	28	asb3	2.40511	1.86668
21	B9	29	asb3	3.11303	2.57159
21	B9	30	asb3	3.90163	3.35718
21	B9	31	asb3	4.70048	4.15302
21	B9	32	asb3	5.44453	4.89406
21	B9	33	asb3	6.08178	5.52831
21	B9	34	asb3	6.60371	6.04723
21	B9	35	asb3	7.02184	6.46234
21	B9	36	asb3	7.35269	6.79018
21	B9	37	asb3	7.6387	7.07319
21	B9	38	asb3	7.87523	7.30671
21	B9	39	asb3	8.07025	7.49873
21	B9	40	asb3	8.20815	7.63361
22	B10	1	asb3	0.60178	-0.0675591
22	B10	2	asb3	0.631478	-0.0470383
22	B10	3	asb3	0.673407	-0.0142862
22	B10	4	asb3	0.692466	-0.00440456
22	B10	5	asb3	0.704936	-0.00111154
22	B10	6	asb3	0.7173	0.00207568
22	B10	7	asb3	0.736893	0.0124925
22	B10	8	asb3	0.744776	0.0111986
22	B10	9	asb3	0.744095	0.00134064
22	B10	10	asb3	0.751116	-0.000815698
22	B10	11	asb3	0.765275	0.00416664
22	B10	12	asb3	0.775911	0.00562508
22	B10	13	asb3	0.776951	-0.00251133
22	B10	14	asb3	0.784073	-0.00456616
22	B10	15	asb3	0.793734	-0.00408213
22	B10	16	asb3	0.80282	-0.00417316
22	B10	17	asb3	0.815222	-0.000948389
22	B10	18	asb3	0.835755	0.0104077
22	B10	19	asb3	0.87267	0.0381462
22	B10	20	asb3	0.936824	0.0931229
22	B10	21	asb3	1.05731	0.204435
22	B10	22	asb3	1.27018	0.408129
22	B10	23	asb3	1.57738	0.706148
22	B10	24	asb3	1.98458	1.10417
22	B10	25	asb3	2.50563	1.61605
22	B10	26	asb3	3.16408	2.26532
22	B10	27	asb3	3.90185	2.99391
22	B10	28	asb3	4.6568	3.73968
22	B10	29	asb3	5.37083	4.44454
22	B10	30	asb3	5.98718	5.05171
22	B10	31	asb3	6.49264	5.548
22	B10	32	asb3	6.91944	5.96561
22	B10	33	asb3	7.26059	6.29759
22	B10	34	asb3	7.5287	6.55652
22	B10	35	asb3	7.73856	6.75721
22	B10	36	asb3	7.92593	6.93539
22	B10	37	asb3	8.09321	7.0935
22	B10	38	asb3	8.2253	7.21641
22	B10	39	asb3	8.34079	7.32273
22	B10	40	asb3	8.43207	7.40483
23	B11	1	asb3	0.771154	-0.0657443
23	B11	2	asb3	0.804146	-0.0415004
23	B11	3	asb3	0.83949	-0.0149048
23	B11	4	asb3	0.856463	-0.00668037
23	B11	5	asb3	0.868325	-0.00356631
23	B11	6	asb3	0.884583	0.00394282
23	B11	7	asb3	0.89936	0.00997172
23	B11	8	asb3	0.907368	0.00923127
23	B11	9	asb3	0.918173	0.0112876
23	B11	10	asb3	0.92296	0.0073267
23	B11	11	asb3	0.92726	0.00287818
23	B11	12	asb3	0.934343	0.00121314
23	B11	13	asb3	0.939664	-0.00221471
23	B11	14	asb3	0.943671	-0.00695594
23	B11	15	asb3	0.947846	-0.0115294
23	B11	16	asb3	0.963112	-0.00501131
23	B11	17	asb3	0.983624	0.0067518
23	B11	18	asb3	1.0087	0.023083
23	B11	19	asb3	1.03842	0.0440466
23	B11	20	asb3	1.10021	0.0970971
23	B11	21	asb3	1.21608	0.204216
23	B11	22	asb3	1.4167	0.396087
23	B11	23	asb3	1.73218	0.702822
23	B11	24	asb3	2.14491	1.1068
23	B11	25	asb3	2.6671	1.62024
23	B11	26	asb3	3.32095	2.26535
23	B11	27	asb3	4.08163	3.01728
23	B11	28	asb3	4.84117	3.76806
23	B11	29	asb3	5.55261	4.47075
23	B11	30	asb3	6.18045	5.08985
23	B11	31	asb3	6.68638	5.58704
23	B11	32	asb3	7.07843	5.97033
23	B11	33	asb3	7.39792	6.28108
23	B11	34	asb3	7.64684	6.52125
23	B11	35	asb3	7.85873	6.72439
23	B11	36	asb3	8.03787	6.89478
23	B11	37	asb3	8.18796	7.03613
23	B11	38	asb3	8.31326	7.15267
23	B11	39	asb3	8.42221	7.25288
23	B11	40	asb3	8.50378	7.3257
24	B12	1	asb3	0.596017	-0.0770538
24	B12	2	asb3	0.625715	-0.0560102
24	B12	3	asb3	0.668841	-0.0215383
24	B12	4	asb3	0.695194	-0.00383913
24	B12	5	asb3	0.712662	0.00497507
24	B12	6	asb3	0.720661	0.0043193
24	B12	7	asb3	0.732535	0.00753925
24	B12	8	asb3	0.748192	0.0145427
24	B12	9	asb3	0.747023	0.00471886
24	B12	10	asb3	0.750461	-0.00049709
24	B12	11	asb3	0.762277	0.00266547
24	B12	12	asb3	0.76839	0.000124213
24	B12	13	asb3	0.78058	0.00365948
24	B12	14	asb3	0.783996	-0.00157859
24	B12	15	asb3	0.786487	-0.00774112
24	B12	16	asb3	0.795532	-0.00735012
24	B12	17	asb3	0.811538	1.5078e-06
24	B12	18	asb3	0.837535	0.0173439
24	B12	19	asb3	0.875428	0.0465834
24	B12	20	asb3	0.939153	0.101654
24	B12	21	asb3	1.04845	0.2023
24	B12	22	asb3	1.25948	0.404676
24	B12	23	asb3	1.58184	0.718376
24	B12	24	asb3	2.00035	1.12824
24	B12	25	asb3	2.53446	1.65369
24	B12	26	asb3	3.2084	2.31898
24	B12	27	asb3	3.95987	3.0618
24	B12	28	asb3	4.72052	3.81379
24	B12	29	asb3	5.4498	4.53441
24	B12	30	asb3	6.07126	5.14722
24	B12	31	asb3	6.5706	5.63791
24	B12	32	asb3	6.96711	6.02576
24	B12	33	asb3	7.27909	6.32909
24	B12	34	asb3	7.53133	6.57268
24	B12	35	asb3	7.7528	6.78548
24	B12	36	asb3	7.92838	6.95242
24	B12	37	asb3	8.06884	7.08422
24	B12	38	asb3	8.18152	7.18824
24	B12	39	asb3	8.27973	7.27781
24	B12	40	asb3	8.33763	7.32704
25	C1	1	18s	0.445714	-0.0511054
25	C1	2	18s	0.455648	-0.0411717
25	C1	3	18s	0.484216	-0.0126031
25	C1	4	18s	0.509423	0.0126031
25	C1	5	18s	0.56529	0.0684703
25	C1	6	18s	0.666881	0.170061
25	C1	7	18s	0.848559	0.35174
25	C1	8	18s	1.11516	0.61834
25	C1	9	18s	1.48739	0.990571
25	C1	10	18s	1.97961	1.48279
25	C1	11	18s	2.59383	2.09701
25	C1	12	18s	3.27728	2.78046
25	C1	13	18s	3.956	3.45918
25	C1	14	18s	4.58101	4.08419
25	C1	15	18s	5.12979	4.63298
25	C1	16	18s	5.59279	5.09597
25	C1	17	18s	5.96499	5.46817
25	C1	18	18s	6.24868	5.75186
25	C1	19	18s	6.49937	6.00255
25	C1	20	18s	6.70567	6.20885
25	C1	21	18s	6.87511	6.37829
25	C1	22	18s	7.0105	6.51368
25	C1	23	18s	7.13587	6.63905
25	C1	24	18s	7.2412	6.74438
25	C1	25	18s	7.3262	6.82938
25	C1	26	18s	7.39632	6.8995
25	C1	27	18s	7.45347	6.95665
25	C1	28	18s	7.51571	7.01889
25	C1	29	18s	7.55843	7.06161
25	C1	30	18s	7.58632	7.0895
25	C1	31	18s	7.6289	7.13208
25	C1	32	18s	7.66914	7.17232
25	C1	33	18s	7.69692	7.2001
25	C1	34	18s	7.72526	7.22844
25	C1	35	18s	7.76007	7.26325
25	C1	36	18s	7.77624	7.27942
25	C1	37	18s	7.79408	7.29726
25	C1	38	18s	7.80608	7.30927
25	C1	39	18s	7.81722	7.32041
25	C1	40	18s	7.83277	7.33595
26	C2	1	18s	0.286998	-0.049887
26	C2	2	18s	0.295787	-0.0410979
26	C2	3	18s	0.320054	-0.0168313
26	C2	4	18s	0.353716	0.0168313
26	C2	5	18s	0.412491	0.0756059
26	C2	6	18s	0.525623	0.188738
26	C2	7	18s	0.709165	0.37228
26	C2	8	18s	0.992833	0.655948
26	C2	9	18s	1.38011	1.04322
26	C2	10	18s	1.89103	1.55414
26	C2	11	18s	2.53503	2.19815
26	C2	12	18s	3.24727	2.91038
26	C2	13	18s	3.99105	3.65417
26	C2	14	18s	4.68391	4.34703
26	C2	15	18s	5.27911	4.94222
26	C2	16	18s	5.79676	5.45988
26	C2	17	18s	6.2348	5.89792
26	C2	18	18s	6.58621	6.24933
26	C2	19	18s	6.8767	6.53981
26	C2	20	18s	7.10997	6.77308
26	C2	21	18s	7.30921	6.97232
26	C2	22	18s	7.48063	7.14375
26	C2	23	18s	7.62102	7.28414
26	C2	24	18s	7.72565	7.38876
26	C2	25	18s	7.82992	7.49304
26	C2	26	18s	7.92948	7.5926
26	C2	27	18s	8.00146	7.66458
26	C2	28	18s	8.0599	7.72302
26	C2	29	18s	8.11374	7.77685
26	C2	30	18s	8.17257	7.83569
26	C2	31	18s	8.21999	7.88311
26	C2	32	18s	8.2539	7.91701
26	C2	33	18s	8.27859	7.94171
26	C2	34	18s	8.30296	7.96607
26	C2	35	18s	8.33807	8.00119
26	C2	36	18s	8.38122	8.04433
26	C2	37	18s	8.41163	8.07474
26	C2	38	18s	8.42137	8.08448
26	C2	39	18s	8.43638	8.0995
26	C2	40	18s	8.45304	8.11616
27	C3	1	18s	0.319054	-0.0507528
27	C3	2	18s	0.327905	-0.0419017
27	C3	3	18s	0.351468	-0.0183383
27	C3	4	18s	0.388145	0.0183383
27	C3	5	18s	0.454736	0.084929
27	C3	6	18s	0.57323	0.203423
27	C3	7	18s	0.771496	0.40169
27	C3	8	18s	1.06945	0.699644
27	C3	9	18s	1.48118	1.11137
27	C3	10	18s	2.02451	1.65471
27	C3	11	18s	2.70547	2.33567
27	C3	12	18s	3.47606	3.10625
27	C3	13	18s	4.2537	3.8839
27	C3	14	18s	4.97445	4.60464
27	C3	15	18s	5.61307	5.24326
27	C3	16	18s	6.16983	5.80002
27	C3	17	18s	6.62433	6.25452
27	C3	18	18s	6.97743	6.60763
27	C3	19	18s	7.27112	6.90132
27	C3	20	18s	7.51601	7.14621
27	C3	21	18s	7.72375	7.35394
27	C3	22	18s	7.88021	7.51041
27	C3	23	18s	8.03978	7.66997
27	C3	24	18s	8.17811	7.8083
27	C3	25	18s	8.27517	7.90536
27	C3	26	18s	8.36103	7.99122
27	C3	27	18s	8.44291	8.0731
27	C3	28	18s	8.51622	8.14641
27	C3	29	18s	8.58364	8.21384
27	C3	30	18s	8.62764	8.25783
27	C3	31	18s	8.67686	8.30705
27	C3	32	18s	8.7215	8.35169
27	C3	33	18s	8.76011	8.3903
27	C3	34	18s	8.77954	8.40974
27	C3	35	18s	8.8087	8.4389
27	C3	36	18s	8.83835	8.46854
27	C3	37	18s	8.8687	8.4989
27	C3	38	18s	8.89027	8.52047
27	C3	39	18s	8.89783	8.52803
27	C3	40	18s	8.91113	8.54132
28	C4	1	18s	0.400018	-0.0609879
28	C4	2	18s	0.417044	-0.0439618
28	C4	3	18s	0.461006	0
28	C4	4	18s	0.524998	0.0639921
28	C4	5	18s	0.631741	0.170735
28	C4	6	18s	0.817645	0.356639
28	C4	7	18s	1.10835	0.647344
28	C4	8	18s	1.50706	1.04605
28	C4	9	18s	2.04406	1.58305
28	C4	10	18s	2.71573	2.25472
28	C4	11	18s	3.46596	3.00495
28	C4	12	18s	4.23459	3.77358
28	C4	13	18s	4.96063	4.49962
28	C4	14	18s	5.59314	5.13213
28	C4	15	18s	6.1289	5.66789
28	C4	16	18s	6.56341	6.1024
28	C4	17	18s	6.93579	6.47478
28	C4	18	18s	7.23719	6.77618
28	C4	19	18s	7.47826	7.01726
28	C4	20	18s	7.67719	7.21618
28	C4	21	18s	7.84151	7.38051
28	C4	22	18s	7.98827	7.52727
28	C4	23	18s	8.11011	7.6491
28	C4	24	18s	8.20832	7.74731
28	C4	25	18s	8.32042	7.85941
28	C4	26	18s	8.40392	7.94291
28	C4	27	18s	8.45071	7.9897
28	C4	28	18s	8.49747	8.03647
28	C4	29	18s	8.54017	8.07916
28	C4	30	18s	8.58075	8.11975
28	C4	31	18s	8.63755	8.17654
28	C4	32	18s	8.68994	8.22893
28	C4	33	18s	8.72248	8.26147
28	C4	34	18s	8.73965	8.27864
28	C4	35	18s	8.76007	8.29906
28	C4	36	18s	8.76821	8.3072
28	C4	37	18s	8.80103	8.34003
28	C4	38	18s	8.83112	8.37011
28	C4	39	18s	8.84659	8.38558
28	C4	40	18s	8.85771	8.3967
29	C5	1	18s	0.408529	-0.0593858
29	C5	2	18s	0.425189	-0.042726
29	C5	3	18s	0.467915	0
29	C5	4	18s	0.531873	0.0639582
29	C5	5	18s	0.643265	0.17535
29	C5	6	18s	0.831168	0.363252
29	C5	7	18s	1.12757	0.659656
29	C5	8	18s	1.53094	1.06303
29	C5	9	18s	2.06548	1.59756
29	C5	10	18s	2.74136	2.27345
29	C5	11	18s	3.52555	3.05763
29	C5	12	18s	4.32101	3.85309
29	C5	13	18s	5.06764	4.59973
29	C5	14	18s	5.73879	5.27087
29	C5	15	18s	6.31069	5.84278
29	C5	16	18s	6.78001	6.3121
29	C5	17	18s	7.17362	6.7057
29	C5	18	18s	7.50175	7.03384
29	C5	19	18s	7.75839	7.29048
29	C5	20	18s	7.96913	7.50121
29	C5	21	18s	8.15169	7.68377
29	C5	22	18s	8.29528	7.82736
29	C5	23	18s	8.4334	7.96548
29	C5	24	18s	8.55027	8.08236
29	C5	25	18s	8.6405	8.17258
29	C5	26	18s	8.73207	8.26416
29	C5	27	18s	8.83727	8.36936
29	C5	28	18s	8.90004	8.43212
29	C5	29	18s	8.9433	8.47538
29	C5	30	18s	8.9782	8.51028
29	C5	31	18s	9.02543	8.55751
29	C5	32	18s	9.06756	8.59964
29	C5	33	18s	9.08392	8.61601
29	C5	34	18s	9.13203	8.66412
29	C5	35	18s	9.17043	8.70252
29	C5	36	18s	9.19389	8.72597
29	C5	37	18s	9.20756	8.73965
29	C5	38	18s	9.24021	8.7723
29	C5	39	18s	9.26242	8.79451
29	C5	40	18s	9.26776	8.79985
30	C6	1	18s	0.440774	-0.0588173
30	C6	2	18s	0.454333	-0.045258
30	C6	3	18s	0.499591	0
30	C6	4	18s	0.566204	0.0666133
30	C6	5	18s	0.671768	0.172177
30	C6	6	18s	0.856847	0.357256
30	C6	7	18s	1.15745	0.657856
30	C6	8	18s	1.57155	1.07196
30	C6	9	18s	2.12061	1.62102
30	C6	10	18s	2.81226	2.31267
30	C6	11	18s	3.60491	3.10532
30	C6	12	18s	4.41677	3.91718
30	C6	13	18s	5.18337	4.68378
30	C6	14	18s	5.86047	5.36088
30	C6	15	18s	6.42931	5.92972
30	C6	16	18s	6.90158	6.40199
30	C6	17	18s	7.28981	6.79022
30	C6	18	18s	7.61223	7.11264
30	C6	19	18s	7.86362	7.36403
30	C6	20	18s	8.0627	7.56311
30	C6	21	18s	8.25575	7.75616
30	C6	22	18s	8.43661	7.93702
30	C6	23	18s	8.57022	8.07063
30	C6	24	18s	8.67398	8.17439
30	C6	25	18s	8.76249	8.2629
30	C6	26	18s	8.85276	8.35317
30	C6	27	18s	8.92216	8.42257
30	C6	28	18s	8.99708	8.49749
30	C6	29	18s	9.06141	8.56182
30	C6	30	18s	9.11375	8.61416
30	C6	31	18s	9.16096	8.66137
30	C6	32	18s	9.18465	8.68506
30	C6	33	18s	9.21779	8.7182
30	C6	34	18s	9.25199	8.7524
30	C6	35	18s	9.28931	8.78972
30	C6	36	18s	9.32442	8.82483
30	C6	37	18s	9.3456	8.84601
30	C6	38	18s	9.3626	8.86301
30	C6	39	18s	9.36933	8.86974
30	C6	40	18s	9.38756	8.88797
31	C7	1	asb3	0.237846	-0.0199633
31	C7	2	asb3	0.243479	-0.0169135
31	C7	3	asb3	0.254958	-0.00801803
31	C7	4	asb3	0.264568	-0.000991085
31	C7	5	asb3	0.268846	0.000703125
31	C7	6	asb3	0.273189	0.00246299
31	C7	7	asb3	0.275588	0.0022787
31	C7	8	asb3	0.27699	0.00109722
31	C7	9	asb3	0.281186	0.00271013
31	C7	10	asb3	0.284885	0.00382555
31	C7	11	asb3	0.284345	0.000702273
31	C7	12	asb3	0.285481	-0.000744921
31	C7	13	asb3	0.291263	0.00245359
31	C7	14	asb3	0.294245	0.00285143
31	C7	15	asb3	0.291555	-0.00242206
31	C7	16	asb3	0.291031	-0.00552927
31	C7	17	asb3	0.297764	-0.00137965
31	C7	18	asb3	0.302073	0.000346244
31	C7	19	asb3	0.319055	0.0147446
31	C7	20	asb3	0.334932	0.0280386
31	C7	21	asb3	0.369155	0.0596784
31	C7	22	asb3	0.437884	0.125823
31	C7	23	asb3	0.567723	0.253079
31	C7	24	asb3	0.785771	0.468544
31	C7	25	asb3	1.11958	0.799773
31	C7	26	asb3	1.56331	1.24092
31	C7	27	asb3	2.1296	1.80462
31	C7	28	asb3	2.84132	2.51376
31	C7	29	asb3	3.66922	3.33907
31	C7	30	asb3	4.51271	4.17998
31	C7	31	asb3	5.29875	4.96344
31	C7	32	asb3	6.00649	5.66859
31	C7	33	asb3	6.59465	6.25417
31	C7	34	asb3	7.07093	6.72787
31	C7	35	asb3	7.44507	7.09942
31	C7	36	asb3	7.75578	7.40756
31	C7	37	asb3	8.01492	7.6641
31	C7	38	asb3	8.19419	7.8408
31	C7	39	asb3	8.34649	7.99051
31	C7	40	asb3	8.47146	8.1129
32	C8	1	asb3	0.371486	-0.0224809
32	C8	2	asb3	0.381297	-0.0158934
32	C8	3	asb3	0.399291	-0.00112344
32	C8	4	asb3	0.404651	0.00101355
32	C8	5	asb3	0.40475	-0.00211222
32	C8	6	asb3	0.411012	0.000926747
32	C8	7	asb3	0.415957	0.00264797
32	C8	8	asb3	0.416723	0.000189806
32	C8	9	asb3	0.420939	0.00118177
32	C8	10	asb3	0.422333	-0.000648464
32	C8	11	asb3	0.425718	-0.000486975
32	C8	12	asb3	0.428292	-0.00113682
32	C8	13	asb3	0.431383	-0.00126916
32	C8	14	asb3	0.436822	0.000945594
32	C8	15	asb3	0.437726	-0.00137417
32	C8	16	asb3	0.441838	-0.000486517
32	C8	17	asb3	0.445963	0.000414606
32	C8	18	asb3	0.45009	0.00131773
32	C8	19	asb3	0.461105	0.00910918
32	C8	20	asb3	0.478564	0.0233448
32	C8	21	asb3	0.514113	0.0556694
32	C8	22	asb3	0.579923	0.118256
32	C8	23	asb3	0.703082	0.238191
32	C8	24	asb3	0.926793	0.458678
32	C8	25	asb3	1.25113	0.779795
32	C8	26	asb3	1.66811	1.19355
32	C8	27	asb3	2.21258	1.7348
32	C8	28	asb3	2.91003	2.42902
32	C8	29	asb3	3.71799	3.23376
32	C8	30	asb3	4.55005	4.06259
32	C8	31	asb3	5.34367	4.85299
32	C8	32	asb3	6.04993	5.55602
32	C8	33	asb3	6.65057	6.15344
32	C8	34	asb3	7.14632	6.64597
32	C8	35	asb3	7.53908	7.0355
32	C8	36	asb3	7.85149	7.34469
32	C8	37	asb3	8.11284	7.60282
32	C8	38	asb3	8.34186	7.82861
32	C8	39	asb3	8.52036	8.00389
32	C8	40	asb3	8.63483	8.11513
33	C9	1	asb3	0.329425	-0.016448
33	C9	2	asb3	0.335087	-0.0132221
33	C9	3	asb3	0.351588	0.000842548
33	C9	4	asb3	0.353888	0.000705988
33	C9	5	asb3	0.353246	-0.0023717
33	C9	6	asb3	0.357885	-0.000169169
33	C9	7	asb3	0.363625	0.00313537
33	C9	8	asb3	0.367828	0.00490198
33	C9	9	asb3	0.366877	0.0015147
33	C9	10	asb3	0.365809	-0.00198892
33	C9	11	asb3	0.367357	-0.00287739
33	C9	12	asb3	0.368431	-0.00423916
33	C9	13	asb3	0.374788	-0.000318102
33	C9	14	asb3	0.374403	-0.00313961
33	C9	15	asb3	0.375591	-0.00438741
33	C9	16	asb3	0.382039	-0.000376234
33	C9	17	asb3	0.387602	0.00275068
33	C9	18	asb3	0.393304	0.00601644
33	C9	19	asb3	0.396413	0.00668955
33	C9	20	asb3	0.416253	0.0240932
33	C9	21	asb3	0.454375	0.0597793
33	C9	22	asb3	0.52139	0.124358
33	C9	23	asb3	0.642145	0.242677
33	C9	24	asb3	0.865673	0.463769
33	C9	25	asb3	1.18251	0.778174
33	C9	26	asb3	1.59371	1.18693
33	C9	27	asb3	2.12236	1.71315
33	C9	28	asb3	2.78284	2.37119
33	C9	29	asb3	3.5619	3.14782
33	C9	30	asb3	4.36991	3.95339
33	C9	31	asb3	5.13697	4.71801
33	C9	32	asb3	5.84585	5.42446
33	C9	33	asb3	6.44641	6.02258
33	C9	34	asb3	6.93509	6.50882
33	C9	35	asb3	7.34739	6.91869
33	C9	36	asb3	7.67984	7.2487
33	C9	37	asb3	7.96716	7.53359
33	C9	38	asb3	8.19145	7.75544
33	C9	39	asb3	8.35176	7.91331
33	C9	40	asb3	8.47403	8.03315
34	C10	1	asb3	0.718069	-0.0155203
34	C10	2	asb3	0.725125	-0.00936389
34	C10	3	asb3	0.731375	-0.00401341
34	C10	4	asb3	0.737059	0.000770766
34	C10	5	asb3	0.738183	0.000996141
34	C10	6	asb3	0.738545	0.000458458
34	C10	7	asb3	0.739868	0.000881185
34	C10	8	asb3	0.74198	0.00209343
34	C10	9	asb3	0.743482	0.00269658
34	C10	10	asb3	0.742046	0.000360927
34	C10	11	asb3	0.740757	-0.00182798
34	C10	12	asb3	0.740657	-0.00282713
34	C10	13	asb3	0.741914	-0.00247032
34	C10	14	asb3	0.746265	0.000981632
34	C10	15	asb3	0.749041	0.00285812
34	C10	16	asb3	0.749321	0.00223818
34	C10	17	asb3	0.746291	-0.0016919
34	C10	18	asb3	0.747378	-0.00150467
34	C10	19	asb3	0.75854	0.00875818
34	C10	20	asb3	0.773566	0.0228843
34	C10	21	asb3	0.789374	0.0377931
34	C10	22	asb3	0.820593	0.0681125
34	C10	23	asb3	0.890327	0.136947
34	C10	24	asb3	1.02429	0.270012
34	C10	25	asb3	1.23028	0.475103
34	C10	26	asb3	1.51548	0.759399
34	C10	27	asb3	1.87871	1.12173
34	C10	28	asb3	2.3484	1.59052
34	C10	29	asb3	2.92617	2.16739
34	C10	30	asb3	3.56345	2.80377
34	C10	31	asb3	4.19882	3.43824
34	C10	32	asb3	4.78597	4.0245
34	C10	33	asb3	5.30475	4.54237
34	C10	34	asb3	5.73917	4.97589
34	C10	35	asb3	6.0935	5.32932
34	C10	36	asb3	6.38877	5.6237
34	C10	37	asb3	6.63425	5.86828
34	C10	38	asb3	6.82879	6.06192
34	C10	39	asb3	6.9842	6.21643
34	C10	40	asb3	7.07525	6.30657
35	C11	1	asb3	0.411304	-0.016461
35	C11	2	asb3	0.415501	-0.0164924
35	C11	3	asb3	0.42807	-0.00815267
35	C11	4	asb3	0.438498	-0.00195315
35	C11	5	asb3	0.441176	-0.00350305
35	C11	6	asb3	0.449101	0.000193301
35	C11	7	asb3	0.455396	0.00225908
35	C11	8	asb3	0.462063	0.0046981
35	C11	9	asb3	0.466038	0.00444413
35	C11	10	asb3	0.472457	0.00663475
35	C11	11	asb3	0.474168	0.00411666
35	C11	12	asb3	0.474531	0.000251752
35	C11	13	asb3	0.476101	-0.0024076
35	C11	14	asb3	0.484145	0.00140826
35	C11	15	asb3	0.48963	0.00266467
35	C11	16	asb3	0.491645	0.000451195
35	C11	17	asb3	0.490552	-0.00487049
35	C11	18	asb3	0.493416	-0.00623495
35	C11	19	asb3	0.502528	-0.00135193
35	C11	20	asb3	0.51609	0.00798186
35	C11	21	asb3	0.54086	0.0285234
35	C11	22	asb3	0.582587	0.0660213
35	C11	23	asb3	0.66349	0.142696
35	C11	24	asb3	0.819129	0.294106
35	C11	25	asb3	1.06075	0.531495
35	C11	26	asb3	1.39789	0.86441
35	C11	27	asb3	1.82348	1.28578
35	C11	28	asb3	2.37367	1.83173
35	C11	29	asb3	3.07256	2.5264
35	C11	30	asb3	3.84454	3.29414
35	C11	31	asb3	4.62123	4.0666
35	C11	32	asb3	5.34536	4.78651
35	C11	33	asb3	5.97655	5.41347
35	C11	34	asb3	6.50621	5.9389
35	C11	35	asb3	6.94297	6.37144
35	C11	36	asb3	7.2823	6.70653
35	C11	37	asb3	7.56404	6.98405
35	C11	38	asb3	7.80669	7.22247
35	C11	39	asb3	7.9901	7.40164
35	C11	40	asb3	8.10607	7.51339
36	C12	1	asb3	0.375859	-0.0234325
36	C12	2	asb3	0.38768	-0.0150625
36	C12	3	asb3	0.397243	-0.00894962
36	C12	4	asb3	0.403882	-0.0057615
36	C12	5	asb3	0.413074	-1.97305e-05
36	C12	6	asb3	0.422059	0.00551485
36	C12	7	asb3	0.423518	0.00352351
36	C12	8	asb3	0.42913	0.00568521
36	C12	9	asb3	0.434919	0.00802307
36	C12	10	asb3	0.433158	0.00281192
36	C12	11	asb3	0.433771	-2.57457e-05
36	C12	12	asb3	0.434629	-0.00261826
36	C12	13	asb3	0.438139	-0.00255911
36	C12	14	asb3	0.444258	0.000109351
36	C12	15	asb3	0.446899	-0.000700388
36	C12	16	asb3	0.446649	-0.00440041
36	C12	17	asb3	0.452726	-0.00177412
36	C12	18	asb3	0.458685	0.000734805
36	C12	19	asb3	0.461807	0.000406166
36	C12	20	asb3	0.475962	0.0111106
36	C12	21	asb3	0.497003	0.0287005
36	C12	22	asb3	0.530863	0.0591101
36	C12	23	asb3	0.61061	0.135407
36	C12	24	asb3	0.760776	0.282122
36	C12	25	asb3	1.01248	0.530372
36	C12	26	asb3	1.35906	0.873509
36	C12	27	asb3	1.79804	1.30903
36	C12	28	asb3	2.38858	1.89612
36	C12	29	asb3	3.1041	2.60819
36	C12	30	asb3	3.85129	3.35194
36	C12	31	asb3	4.60339	4.10058
36	C12	32	asb3	5.29607	4.78981
36	C12	33	asb3	5.86415	5.35444
36	C12	34	asb3	6.34766	5.8345
36	C12	35	asb3	6.7316	6.21499
36	C12	36	asb3	7.05793	6.53787
36	C12	37	asb3	7.33441	6.8109
36	C12	38	asb3	7.54611	7.01915
36	C12	39	asb3	7.7198	7.18939
36	C12	40	asb3	7.84078	7.30692
37	D1	1	18s	0.571458	-0.128339
37	D1	2	18s	0.607584	-0.0922129
37	D1	3	18s	0.699797	0
37	D1	4	18s	0.8276	0.127804
37	D1	5	18s	1.03385	0.334051
37	D1	6	18s	1.32958	0.629787
37	D1	7	18s	1.71972	1.01992
37	D1	8	18s	2.23242	1.53262
37	D1	9	18s	2.87072	2.17093
37	D1	10	18s	3.5609	2.8611
37	D1	11	18s	4.23073	3.53094
37	D1	12	18s	4.85578	4.15598
37	D1	13	18s	5.39195	4.69216
37	D1	14	18s	5.85041	5.15062
37	D1	15	18s	6.22711	5.52731
37	D1	16	18s	6.54301	5.84321
37	D1	17	18s	6.79746	6.09767
37	D1	18	18s	7.02031	6.32051
37	D1	19	18s	7.19234	6.49255
37	D1	20	18s	7.30672	6.60692
37	D1	21	18s	7.43625	6.73645
37	D1	22	18s	7.54194	6.84214
37	D1	23	18s	7.64653	6.94674
37	D1	24	18s	7.72903	7.02923
37	D1	25	18s	7.78709	7.08729
37	D1	26	18s	7.83769	7.13789
37	D1	27	18s	7.88454	7.18475
37	D1	28	18s	7.93309	7.2333
37	D1	29	18s	7.96902	7.26922
37	D1	30	18s	8.01549	7.3157
37	D1	31	18s	8.03233	7.33254
37	D1	32	18s	8.07169	7.37189
37	D1	33	18s	8.10715	7.40736
37	D1	34	18s	8.12703	7.42724
37	D1	35	18s	8.15592	7.45613
37	D1	36	18s	8.1907	7.4909
37	D1	37	18s	8.20723	7.50743
37	D1	38	18s	8.19263	7.49284
37	D1	39	18s	8.2129	7.5131
37	D1	40	18s	8.23575	7.53595
38	D2	1	18s	0.763268	-0.149793
38	D2	2	18s	0.809453	-0.103608
38	D2	3	18s	0.913061	0
38	D2	4	18s	1.04643	0.133364
38	D2	5	18s	1.25757	0.344504
38	D2	6	18s	1.55842	0.645354
38	D2	7	18s	1.95517	1.04211
38	D2	8	18s	2.47116	1.5581
38	D2	9	18s	3.0959	2.18284
38	D2	10	18s	3.7775	2.86444
38	D2	11	18s	4.46386	3.5508
38	D2	12	18s	5.10716	4.1941
38	D2	13	18s	5.67284	4.75977
38	D2	14	18s	6.16275	5.24969
38	D2	15	18s	6.56381	5.65075
38	D2	16	18s	6.90096	5.9879
38	D2	17	18s	7.17851	6.26545
38	D2	18	18s	7.40262	6.48956
38	D2	19	18s	7.58776	6.6747
38	D2	20	18s	7.74783	6.83477
38	D2	21	18s	7.89311	6.98005
38	D2	22	18s	8.00908	7.09602
38	D2	23	18s	8.12782	7.21476
38	D2	24	18s	8.21243	7.29937
38	D2	25	18s	8.25869	7.34563
38	D2	26	18s	8.32133	7.40827
38	D2	27	18s	8.36118	7.44812
38	D2	28	18s	8.39574	7.48268
38	D2	29	18s	8.46401	7.55095
38	D2	30	18s	8.51363	7.60056
38	D2	31	18s	8.53295	7.61989
38	D2	32	18s	8.56156	7.6485
38	D2	33	18s	8.60453	7.69147
38	D2	34	18s	8.64672	7.73366
38	D2	35	18s	8.66926	7.7562
38	D2	36	18s	8.67574	7.76268
38	D2	37	18s	8.6931	7.78004
38	D2	38	18s	8.71162	7.79856
38	D2	39	18s	8.73026	7.8172
38	D2	40	18s	8.73305	7.81999
39	D3	1	18s	0.717271	-0.139176
39	D3	2	18s	0.757618	-0.0988287
39	D3	3	18s	0.856447	0
39	D3	4	18s	0.996882	0.140435
39	D3	5	18s	1.21846	0.362009
39	D3	6	18s	1.53856	0.68211
39	D3	7	18s	1.96426	1.10782
39	D3	8	18s	2.52192	1.66547
39	D3	9	18s	3.21572	2.35927
39	D3	10	18s	3.97592	3.11947
39	D3	11	18s	4.70623	3.84978
39	D3	12	18s	5.3883	4.53185
39	D3	13	18s	5.99194	5.13549
39	D3	14	18s	6.50043	5.64398
39	D3	15	18s	6.9072	6.05075
39	D3	16	18s	7.24607	6.38962
39	D3	17	18s	7.53272	6.67627
39	D3	18	18s	7.77204	6.9156
39	D3	19	18s	7.97864	7.12219
39	D3	20	18s	8.13729	7.28084
39	D3	21	18s	8.24582	7.38937
39	D3	22	18s	8.36257	7.50612
39	D3	23	18s	8.4882	7.63175
39	D3	24	18s	8.58597	7.72953
39	D3	25	18s	8.66103	7.80458
39	D3	26	18s	8.72297	7.86652
39	D3	27	18s	8.78014	7.92369
39	D3	28	18s	8.83024	7.97379
39	D3	29	18s	8.87315	8.0167
39	D3	30	18s	8.90729	8.05084
39	D3	31	18s	8.94747	8.09102
39	D3	32	18s	8.97332	8.11687
39	D3	33	18s	9.01182	8.15537
39	D3	34	18s	9.04439	8.18794
39	D3	35	18s	9.05226	8.19581
39	D3	36	18s	9.07566	8.21922
39	D3	37	18s	9.11501	8.25856
39	D3	38	18s	9.14335	8.2869
39	D3	39	18s	9.16228	8.30583
39	D3	40	18s	9.17092	8.31447
40	D4	1	18s	0.773879	-0.153357
40	D4	2	18s	0.820999	-0.106237
40	D4	3	18s	0.927236	0
40	D4	4	18s	1.07095	0.143713
40	D4	5	18s	1.3007	0.373465
40	D4	6	18s	1.63721	0.709969
40	D4	7	18s	2.08104	1.1538
40	D4	8	18s	2.64584	1.71861
40	D4	9	18s	3.33254	2.4053
40	D4	10	18s	4.06926	3.14203
40	D4	11	18s	4.78566	3.85843
40	D4	12	18s	5.43016	4.50293
40	D4	13	18s	5.9931	5.06586
40	D4	14	18s	6.46574	5.53851
40	D4	15	18s	6.85447	5.92724
40	D4	16	18s	7.16819	6.24096
40	D4	17	18s	7.43821	6.51098
40	D4	18	18s	7.68403	6.7568
40	D4	19	18s	7.86515	6.93791
40	D4	20	18s	7.99977	7.07254
40	D4	21	18s	8.13118	7.20395
40	D4	22	18s	8.24242	7.31519
40	D4	23	18s	8.33482	7.40758
40	D4	24	18s	8.41273	7.4855
40	D4	25	18s	8.48643	7.55919
40	D4	26	18s	8.55053	7.6233
40	D4	27	18s	8.60403	7.6768
40	D4	28	18s	8.65828	7.73104
40	D4	29	18s	8.70961	7.78237
40	D4	30	18s	8.75511	7.82788
40	D4	31	18s	8.79675	7.86952
40	D4	32	18s	8.84059	7.91335
40	D4	33	18s	8.86672	7.93948
40	D4	34	18s	8.87004	7.94281
40	D4	35	18s	8.88446	7.95723
40	D4	36	18s	8.91978	7.99254
40	D4	37	18s	8.94531	8.01807
40	D4	38	18s	8.97533	8.04809
40	D4	39	18s	8.98842	8.06119
40	D4	40	18s	8.96663	8.03939
41	D5	1	18s	0.825713	-0.165335
41	D5	2	18s	0.875483	-0.115565
41	D5	3	18s	0.991048	0
41	D5	4	18s	1.14635	0.155302
41	D5	5	18s	1.39032	0.399274
41	D5	6	18s	1.74283	0.751786
41	D5	7	18s	2.20151	1.21046
41	D5	8	18s	2.79229	1.80124
41	D5	9	18s	3.50996	2.51891
41	D5	10	18s	4.28193	3.29088
41	D5	11	18s	5.03782	4.04677
41	D5	12	18s	5.72413	4.73309
41	D5	13	18s	6.32302	5.33198
41	D5	14	18s	6.82885	5.8378
41	D5	15	18s	7.24178	6.25074
41	D5	16	18s	7.58874	6.59769
41	D5	17	18s	7.86913	6.87808
41	D5	18	18s	8.12008	7.12903
41	D5	19	18s	8.31765	7.3266
41	D5	20	18s	8.47701	7.48596
41	D5	21	18s	8.61186	7.62081
41	D5	22	18s	8.71614	7.72509
41	D5	23	18s	8.81101	7.81996
41	D5	24	18s	8.90248	7.91144
41	D5	25	18s	8.99143	8.00039
41	D5	26	18s	9.06024	8.0692
41	D5	27	18s	9.11755	8.1265
41	D5	28	18s	9.18566	8.19461
41	D5	29	18s	9.22538	8.23433
41	D5	30	18s	9.24572	8.25468
41	D5	31	18s	9.27521	8.28416
41	D5	32	18s	9.33172	8.34067
41	D5	33	18s	9.36506	8.37402
41	D5	34	18s	9.37333	8.38228
41	D5	35	18s	9.41094	8.41989
41	D5	36	18s	9.44671	8.45566
41	D5	37	18s	9.4662	8.47516
41	D5	38	18s	9.4741	8.48305
41	D5	39	18s	9.48903	8.49798
41	D5	40	18s	9.49837	8.50732
42	D6	1	18s	0.82676	-0.162431
42	D6	2	18s	0.875306	-0.113885
42	D6	3	18s	0.989191	0
42	D6	4	18s	1.14237	0.153178
42	D6	5	18s	1.37075	0.38156
42	D6	6	18s	1.70955	0.720358
42	D6	7	18s	2.15065	1.16146
42	D6	8	18s	2.71848	1.72929
42	D6	9	18s	3.41669	2.4275
42	D6	10	18s	4.1652	3.17601
42	D6	11	18s	4.89919	3.91
42	D6	12	18s	5.57083	4.58164
42	D6	13	18s	6.16498	5.17579
42	D6	14	18s	6.67032	5.68113
42	D6	15	18s	7.09045	6.10126
42	D6	16	18s	7.44074	6.45155
42	D6	17	18s	7.73433	6.74514
42	D6	18	18s	7.97899	6.9898
42	D6	19	18s	8.18277	7.19358
42	D6	20	18s	8.34996	7.36077
42	D6	21	18s	8.49023	7.50104
42	D6	22	18s	8.601	7.61181
42	D6	23	18s	8.70101	7.71181
42	D6	24	18s	8.79494	7.80575
42	D6	25	18s	8.89185	7.90266
42	D6	26	18s	8.95981	7.97062
42	D6	27	18s	8.99946	8.01027
42	D6	28	18s	9.07132	8.08213
42	D6	29	18s	9.15421	8.16502
42	D6	30	18s	9.19896	8.20977
42	D6	31	18s	9.21451	8.22532
42	D6	32	18s	9.24959	8.2604
42	D6	33	18s	9.2713	8.28211
42	D6	34	18s	9.30548	8.31629
42	D6	35	18s	9.3466	8.35741
42	D6	36	18s	9.37159	8.3824
42	D6	37	18s	9.3846	8.39541
42	D6	38	18s	9.40152	8.41233
42	D6	39	18s	9.41786	8.42867
42	D6	40	18s	9.41365	8.42446
43	D7	1	asb3	0.488655	-0.0819429
43	D7	2	asb3	0.520727	-0.0594995
43	D7	3	asb3	0.565246	-0.0246096
43	D7	4	asb3	0.588439	-0.0110447
43	D7	5	asb3	0.612736	0.00362368
43	D7	6	asb3	0.624932	0.00619105
43	D7	7	asb3	0.634713	0.00634289
43	D7	8	asb3	0.646561	0.00856258
43	D7	9	asb3	0.658321	0.0106941
43	D7	10	asb3	0.672252	0.0149969
43	D7	11	asb3	0.67291	0.00602593
43	D7	12	asb3	0.681082	0.00456951
43	D7	13	asb3	0.689831	0.00368971
43	D7	14	asb3	0.693766	-0.00200323
43	D7	15	asb3	0.70054	-0.00485792
43	D7	16	asb3	0.702496	-0.0125304
43	D7	17	asb3	0.715005	-0.00965051
43	D7	18	asb3	0.732381	-0.00190284
43	D7	19	asb3	0.751931	0.00801862
43	D7	20	asb3	0.785691	0.0321502
43	D7	21	asb3	0.848721	0.0855512
43	D7	22	asb3	0.975773	0.202975
43	D7	23	asb3	1.18202	0.399597
43	D7	24	asb3	1.48084	0.688788
43	D7	25	asb3	1.88031	1.07863
43	D7	26	asb3	2.3944	1.58309
43	D7	27	asb3	3.03936	2.21842
43	D7	28	asb3	3.78095	2.95038
43	D7	29	asb3	4.57226	3.73207
43	D7	30	asb3	5.34595	4.49612
43	D7	31	asb3	6.0454	5.18594
43	D7	32	asb3	6.64051	5.77143
43	D7	33	asb3	7.13097	6.25226
43	D7	34	asb3	7.53691	6.64857
43	D7	35	asb3	7.88151	6.98354
43	D7	36	asb3	8.17666	7.26906
43	D7	37	asb3	8.4158	7.49857
43	D7	38	asb3	8.60446	7.6776
43	D7	39	asb3	8.7741	7.83761
43	D7	40	asb3	8.89684	7.95072
44	D8	1	asb3	0.657871	-0.0672127
44	D8	2	asb3	0.685863	-0.0483525
44	D8	3	asb3	0.725787	-0.0175597
44	D8	4	asb3	0.744504	-0.00797501
44	D8	5	asb3	0.759506	-0.0021055
44	D8	6	asb3	0.776172	0.00542894
44	D8	7	asb3	0.78776	0.00788513
44	D8	8	asb3	0.792005	0.00299838
44	D8	9	asb3	0.804019	0.00588003
44	D8	10	asb3	0.817052	0.00978157
44	D8	11	asb3	0.826388	0.0099847
44	D8	12	asb3	0.831241	0.00570592
44	D8	13	asb3	0.837972	0.00330546
44	D8	14	asb3	0.843868	6.88719e-05
44	D8	15	asb3	0.850116	-0.00281522
44	D8	16	asb3	0.854465	-0.00759754
44	D8	17	asb3	0.863281	-0.0079132
44	D8	18	asb3	0.875254	-0.00507281
44	D8	19	asb3	0.895216	0.00575748
44	D8	20	asb3	0.930837	0.0322468
44	D8	21	asb3	0.999143	0.0914208
44	D8	22	asb3	1.11838	0.201526
44	D8	23	asb3	1.32302	0.397029
44	D8	24	asb3	1.62453	0.689416
44	D8	25	asb3	2.01291	1.06865
44	D8	26	asb3	2.52545	1.57206
44	D8	27	asb3	3.16647	2.20395
44	D8	28	asb3	3.8941	2.92245
44	D8	29	asb3	4.67623	3.69545
44	D8	30	asb3	5.42652	4.43661
44	D8	31	asb3	6.0898	5.09075
44	D8	32	asb3	6.65912	5.65095
44	D8	33	asb3	7.1399	6.12259
44	D8	34	asb3	7.52771	6.50127
44	D8	35	asb3	7.84378	6.80821
44	D8	36	asb3	8.10893	7.06423
44	D8	37	asb3	8.33252	7.27868
44	D8	38	asb3	8.50747	7.44451
44	D8	39	asb3	8.66799	7.59589
44	D8	40	asb3	8.78529	7.70406
45	D9	1	asb3	0.413697	-0.0665777
45	D9	2	asb3	0.444184	-0.0454695
45	D9	3	asb3	0.483376	-0.0156565
45	D9	4	asb3	0.49879	-0.00962225
45	D9	5	asb3	0.51178	-0.00601126
45	D9	6	asb3	0.528257	0.00108717
45	D9	7	asb3	0.544446	0.00789652
45	D9	8	asb3	0.556141	0.0102121
45	D9	9	asb3	0.562707	0.00739916
45	D9	10	asb3	0.57851	0.0138229
45	D9	11	asb3	0.584664	0.0105979
45	D9	12	asb3	0.588978	0.0055328
45	D9	13	asb3	0.59509	0.00226604
45	D9	14	asb3	0.601338	-0.000865239
45	D9	15	asb3	0.603617	-0.00796511
45	D9	16	asb3	0.61235	-0.00861171
45	D9	17	asb3	0.624709	-0.00563149
45	D9	18	asb3	0.635269	-0.00445102
45	D9	19	asb3	0.654241	0.00514138
45	D9	20	asb3	0.689662	0.0311838
45	D9	21	asb3	0.749594	0.0817365
45	D9	22	asb3	0.861601	0.184364
45	D9	23	asb3	1.05693	0.370319
45	D9	24	asb3	1.33894	0.642948
45	D9	25	asb3	1.7123	1.00693
45	D9	26	asb3	2.18827	1.47351
45	D9	27	asb3	2.77145	2.04732
45	D9	28	asb3	3.45615	2.72263
45	D9	29	asb3	4.19419	3.4513
45	D9	30	asb3	4.90426	4.15199
45	D9	31	asb3	5.56254	4.80089
45	D9	32	asb3	6.1482	5.37717
45	D9	33	asb3	6.63251	5.8521
45	D9	34	asb3	7.04068	6.2509
45	D9	35	asb3	7.38396	6.58479
45	D9	36	asb3	7.65931	6.85076
45	D9	37	asb3	7.87148	7.05356
45	D9	38	asb3	8.05989	7.23259
45	D9	39	asb3	8.23689	7.40021
45	D9	40	asb3	8.36186	7.5158
46	D10	1	asb3	0.791812	-0.0628773
46	D10	2	asb3	0.822962	-0.0440984
46	D10	3	asb3	0.869808	-0.0096239
46	D10	4	asb3	0.890766	-0.00103626
46	D10	5	asb3	0.901902	-0.00227206
46	D10	6	asb3	0.918323	0.00177847
46	D10	7	asb3	0.933785	0.00486889
46	D10	8	asb3	0.947343	0.00605613
46	D10	9	asb3	0.957393	0.00373517
46	D10	10	asb3	0.970659	0.00463041
46	D10	11	asb3	0.980876	0.00247598
46	D10	12	asb3	0.990253	-0.000517568
46	D10	13	asb3	1.00481	0.00166555
46	D10	14	asb3	1.01052	-0.00498927
46	D10	15	asb3	1.02111	-0.00677153
46	D10	16	asb3	1.04252	0.00226231
46	D10	17	asb3	1.07419	0.0215611
46	D10	18	asb3	1.11491	0.0499153
46	D10	19	asb3	1.21607	0.138698
46	D10	20	asb3	1.39236	0.302619
46	D10	21	asb3	1.66969	0.56758
46	D10	22	asb3	2.03345	0.918965
46	D10	23	asb3	2.49579	1.36894
46	D10	24	asb3	3.08797	1.94874
46	D10	25	asb3	3.78796	2.63637
46	D10	26	asb3	4.53704	3.37307
46	D10	27	asb3	5.27283	4.0965
46	D10	28	asb3	5.94443	4.75573
46	D10	29	asb3	6.51994	5.31886
46	D10	30	asb3	6.9901	5.77666
46	D10	31	asb3	7.38415	6.15833
46	D10	32	asb3	7.7103	6.47211
46	D10	33	asb3	7.96765	6.71709
46	D10	34	asb3	8.16586	6.90293
46	D10	35	asb3	8.34696	7.07166
46	D10	36	asb3	8.50976	7.22209
46	D10	37	asb3	8.63533	7.33528
46	D10	38	asb3	8.71993	7.40751
46	D10	39	asb3	8.81953	7.49474
46	D10	40	asb3	8.89954	7.56238
47	D11	1	asb3	0.738142	-0.0600364
47	D11	2	asb3	0.773152	-0.0366691
47	D11	3	asb3	0.813525	-0.00793965
47	D11	4	asb3	0.828432	-0.00467623
47	D11	5	asb3	0.83992	-0.00483144
47	D11	6	asb3	0.856436	4.14757e-05
47	D11	7	asb3	0.876472	0.00843423
47	D11	8	asb3	0.886124	0.00644313
47	D11	9	asb3	0.895032	0.0037077
47	D11	10	asb3	0.913118	0.0101505
47	D11	11	asb3	0.923208	0.00859742
47	D11	12	asb3	0.925073	-0.00118125
47	D11	13	asb3	0.929	-0.00889737
47	D11	14	asb3	0.94557	-0.00397039
47	D11	15	asb3	0.955305	-0.00587816
47	D11	16	asb3	0.966637	-0.00618983
47	D11	17	asb3	1.00152	0.0170486
47	D11	18	asb3	1.05901	0.0628973
47	D11	19	asb3	1.15678	0.149022
47	D11	20	asb3	1.33132	0.31192
47	D11	21	asb3	1.60583	0.574783
47	D11	22	asb3	1.96478	0.922098
47	D11	23	asb3	2.42639	1.37206
47	D11	24	asb3	3.01342	1.94744
47	D11	25	asb3	3.71038	2.63276
47	D11	26	asb3	4.45576	3.3665
47	D11	27	asb3	5.17538	4.07448
47	D11	28	asb3	5.8719	4.75935
47	D11	29	asb3	6.47571	5.35152
47	D11	30	asb3	6.97242	5.83659
47	D11	31	asb3	7.40195	6.25448
47	D11	32	asb3	7.74131	6.5822
47	D11	33	asb3	7.9896	6.81883
47	D11	34	asb3	8.2091	7.02669
47	D11	35	asb3	8.40734	7.2133
47	D11	36	asb3	8.56783	7.36214
47	D11	37	asb3	8.67961	7.46227
47	D11	38	asb3	8.77958	7.5506
47	D11	39	asb3	8.88825	7.64763
47	D11	40	asb3	8.96652	7.71426
48	D12	1	asb3	0.707927	-0.0563816
48	D12	2	asb3	0.737886	-0.0377861
48	D12	3	asb3	0.772173	-0.0148617
48	D12	4	asb3	0.79189	-0.00650793
48	D12	5	asb3	0.816129	0.00636867
48	D12	6	asb3	0.829946	0.0088228
48	D12	7	asb3	0.836999	0.00451282
48	D12	8	asb3	0.851647	0.0077976
48	D12	9	asb3	0.859076	0.0038633
48	D12	10	asb3	0.870364	0.00378829
48	D12	11	asb3	0.877493	-0.000446055
48	D12	12	asb3	0.883545	-0.0057562
48	D12	13	asb3	0.897429	-0.00323532
48	D12	14	asb3	0.91158	-0.000448054
48	D12	15	asb3	0.919492	-0.00389824
48	D12	16	asb3	0.925035	-0.00971908
48	D12	17	asb3	0.966014	0.019897
48	D12	18	asb3	1.0236	0.0661191
48	D12	19	asb3	1.11876	0.149914
48	D12	20	asb3	1.29446	0.314256
48	D12	21	asb3	1.56845	0.576885
48	D12	22	asb3	1.94068	0.937745
48	D12	23	asb3	2.41641	1.40212
48	D12	24	asb3	3.02082	1.99516
48	D12	25	asb3	3.73132	2.6943
48	D12	26	asb3	4.49594	3.44756
48	D12	27	asb3	5.23744	4.17769
48	D12	28	asb3	5.91525	4.84414
48	D12	29	asb3	6.49831	5.41584
48	D12	30	asb3	6.96872	5.87488
48	D12	31	asb3	7.34909	6.24389
48	D12	32	asb3	7.6765	6.55994
48	D12	33	asb3	7.93234	6.80441
48	D12	34	asb3	8.12613	6.98684
48	D12	35	asb3	8.30435	7.1537
48	D12	36	asb3	8.45877	7.29676
48	D12	37	asb3	8.58368	7.4103
48	D12	38	asb3	8.67364	7.4889
48	D12	39	asb3	8.74596	7.54986
48	D12	40	asb3	8.7948	7.58733
49	E1	1	18s	0.657344	-0.135403
49	E1	2	18s	0.696985	-0.0957617
49	E1	3	18s	0.792747	0
49	E1	4	18s	0.927137	0.134391
49	E1	5	18s	1.13386	0.341112
49	E1	6	18s	1.43206	0.639312
49	E1	7	18s	1.81347	1.02072
49	E1	8	18s	2.31078	1.51803
49	E1	9	18s	2.9134	2.12065
49	E1	10	18s	3.55503	2.76229
49	E1	11	18s	4.17824	3.3855
49	E1	12	18s	4.75426	3.96152
49	E1	13	18s	5.26797	4.47522
49	E1	14	18s	5.7172	4.92445
49	E1	15	18s	6.1033	5.31055
49	E1	16	18s	6.41389	5.62114
49	E1	17	18s	6.63982	5.84708
49	E1	18	18s	6.8404	6.04766
49	E1	19	18s	7.04827	6.25552
49	E1	20	18s	7.21554	6.4228
49	E1	21	18s	7.32572	6.53298
49	E1	22	18s	7.42877	6.63602
49	E1	23	18s	7.51134	6.71859
49	E1	24	18s	7.58507	6.79232
49	E1	25	18s	7.65125	6.8585
49	E1	26	18s	7.71994	6.92719
49	E1	27	18s	7.78262	6.98988
49	E1	28	18s	7.82258	7.02984
49	E1	29	18s	7.86963	7.07688
49	E1	30	18s	7.91742	7.12467
49	E1	31	18s	7.9554	7.16265
49	E1	32	18s	8.00434	7.21159
49	E1	33	18s	8.03384	7.24109
[truncated: 1,887 more rows]

## Sheet: Results
Block Type	96-Well 0.2-mL Block
Calibration Background is expired	No
Calibration Background performed on	08-01-2022
Calibration Pure Dye ABY is expired	No
Calibration Pure Dye ABY performed on	08-01-2022
Calibration Pure Dye CY5 is expired	No
Calibration Pure Dye CY5 performed on	08-01-2022
Calibration Pure Dye FAM is expired	No
Calibration Pure Dye FAM performed on	08-01-2022
Calibration Pure Dye JUN is expired	No
Calibration Pure Dye JUN performed on	08-01-2022
Calibration Pure Dye MUSTANG PURPLE is expired	No
Calibration Pure Dye MUSTANG PURPLE performed on	08-01-2022
Calibration Pure Dye NED is expired	No
Calibration Pure Dye NED performed on	08-01-2022
Calibration Pure Dye ROX is expired	No
Calibration Pure Dye ROX performed on	08-01-2022
Calibration Pure Dye SYBR is expired	No
Calibration Pure Dye SYBR performed on	08-01-2022
Calibration Pure Dye TAMRA is expired	No
Calibration Pure Dye TAMRA performed on	08-01-2022
Calibration Pure Dye VIC is expired	No
Calibration Pure Dye VIC performed on	08-01-2022
Calibration ROI is expired	No
Calibration ROI performed on	08-01-2022
Calibration Uniformity is expired	No
Calibration Uniformity performed on	08-01-2022
Chemistry	SYBR_GREEN
Date Created	2023-12-01 04:10:17 AM CST
Experiment Barcode
Experiment Comment
Experiment File Name	D:\datas\huang lab\qxy\2023-12-01_023705.eds
Experiment Name	2023-12-01_023705
Experiment Run End Time	2023-12-01 01:07:46 AM CST
Experiment Type	Standard Curve
Instrument Name	272520824
Instrument Serial Number	272520824
Instrument Type	QuantStudio™ 5 System
Passive Reference	ROX
Post-read Stage/Step
Pre-read Stage/Step
Quantification Cycle Method	Ct
Signal Smoothing On	true
Stage where Melt Analysis is performed	Stage3
Stage/ Cycle where Ct Analysis is performed	Stage2, Step2
User Name
Well	Well Position	Omit	Sample Name	Target Name	Task	Reporter	Quencher	CT	Ct Mean	Ct SD	Quantity	Quantity Mean	Quantity SD	Y-Intercept	R(superscript 2)	Slope	Efficiency	Automatic Ct Threshold	Ct Threshold	Automatic Baseline	Baseline Start	Baseline End	Amp Status	Comments	Cq Conf	Tm1	Tm2	Tm3	Tm4
1	A1	FALSE	xin	18s	UNKNOWN	SYBR	None	6.67282	6.62241	0.0655062								TRUE	0.669111	TRUE	3	3	Amp		0.920808	84.1834
2	A2	FALSE	xin	18s	UNKNOWN	SYBR	None	6.54837	6.62241	0.0655062								TRUE	0.669111	TRUE	3	3	Amp		0.907622	84.1834
3	A3	FALSE	xin	18s	UNKNOWN	SYBR	None	6.64605	6.62241	0.0655062								TRUE	0.669111	TRUE	3	3	Amp		0.870447	83.9164
4	A4	FALSE	zigong	18s	UNKNOWN	SYBR	None	5.76253	5.86933	0.139253								TRUE	0.669111	TRUE	3	3	Amp		0.909447	83.9164
5	A5	FALSE	zigong	18s	UNKNOWN	SYBR	None	5.81862	5.86933	0.139253								TRUE	0.669111	TRUE	3	3	Amp		0.890906	83.8713
6	A6	FALSE	zigong	18s	UNKNOWN	SYBR	None	6.02683	5.86933	0.139253								TRUE	0.669111	TRUE	3	3	Amp		0.888582	83.8713
7	A7	FALSE	xin	asb3	UNKNOWN	SYBR	None	24.0371	24.2755	0.436157								TRUE	0.546931	TRUE	3	17	Amp		0.951497	82.4458
8	A8	FALSE	xin	asb3	UNKNOWN	SYBR	None	24.7789	24.2755	0.436157								TRUE	0.546931	TRUE	3	18	Amp		0.849588	82.4458
9	A9	FALSE	xin	asb3	UNKNOWN	SYBR	None	24.0105	24.2755	0.436157								TRUE	0.546931	TRUE	3	18	Amp		0.955103	82.4421
10	A10	FALSE	zigong	asb3	UNKNOWN	SYBR	None	22.976	22.9965	0.037703								TRUE	0.546931	TRUE	3	17	Amp		0.925797	82.1525
11	A11	FALSE	zigong	asb3	UNKNOWN	SYBR	None	22.9734	22.9965	0.037703								TRUE	0.546931	TRUE	3	17	Amp		0.924858	82.4639
12	A12	FALSE	zigong	asb3	UNKNOWN	SYBR	None	23.04	22.9965	0.037703								TRUE	0.546931	TRUE	3	16	Amp		0.920078	82.6089
13	B1	FALSE	gan	18s	UNKNOWN	SYBR	None	6.99457	7.00997	0.0403717								TRUE	0.669111	TRUE	3	3	Amp		0.933184	84.0386
14	B2	FALSE	gan	18s	UNKNOWN	SYBR	None	6.97957	7.00997	0.0403717								TRUE	0.669111	TRUE	3	3	Amp		0.914234	83.8938
15	B3	FALSE	gan	18s	UNKNOWN	SYBR	None	7.05577	7.00997	0.0403717								TRUE	0.669111	TRUE	3	3	Amp		0.897285	83.7715
16	B4	FALSE	ruanchao	18s	UNKNOWN	SYBR	None	5.8045	5.77832	0.0247151								TRUE	0.669111	TRUE	3	3	Amp		0.89921	83.9164
17	B5	FALSE	ruanchao	18s	UNKNOWN	SYBR	None	5.77507	5.77832	0.0247151								TRUE	0.669111	TRUE	3	3	Amp		0.904926	83.7267
18	B6	FALSE	ruanchao	18s	UNKNOWN	SYBR	None	5.75539	5.77832	0.0247151								TRUE	0.669111	TRUE	3	3	Amp		0.900804	83.8713
19	B7	FALSE	gan	asb3	UNKNOWN	SYBR	None	25.1381	25.0714	0.0812903								TRUE	0.546931	TRUE	3	19	Amp		0.965605	82.301
20	B8	FALSE	gan	asb3	UNKNOWN	SYBR	None	24.9809	25.0714	0.0812903								TRUE	0.546931	TRUE	3	19	Amp		0.971894	82.5907
21	B9	FALSE	gan	asb3	UNKNOWN	SYBR	None	25.0953	25.0714	0.0812903								TRUE	0.546931	TRUE	3	19	Amp		0.970827	82.4421
22	B10	FALSE	ruanchao	asb3	UNKNOWN	SYBR	None	22.5071	22.5073	0.0172257								TRUE	0.546931	TRUE	3	17	Amp		0.922615	82.2973
23	B11	FALSE	ruanchao	asb3	UNKNOWN	SYBR	None	22.5246	22.5073	0.0172257								TRUE	0.546931	TRUE	3	15	Amp		0.922932	82.4639
24	B12	FALSE	ruanchao	asb3	UNKNOWN	SYBR	None	22.4901	22.5073	0.0172257								TRUE	0.546931	TRUE	3	16	Amp		0.91813	82.4639
25	C1	FALSE	pi	18s	UNKNOWN	SYBR	None	8.15175	8.03518	0.119407								TRUE	0.669111	TRUE	3	4	Amp		0.918058	83.749
26	C2	FALSE	pi	18s	UNKNOWN	SYBR	None	8.04067	8.03518	0.119407								TRUE	0.669111	TRUE	3	4	Amp		0.914068	83.6042
27	C3	FALSE	pi	18s	UNKNOWN	SYBR	None	7.91312	8.03518	0.119407								TRUE	0.669111	TRUE	3	4	Amp		0.927626	83.6266
28	C4	FALSE	jiruo	18s	UNKNOWN	SYBR	None	7.06591	7.04371	0.0192421								TRUE	0.669111	TRUE	3	3	Amp		0.905998	83.9164
29	C5	FALSE	jiruo	18s	UNKNOWN	SYBR	None	7.03175	7.04371	0.0192421								TRUE	0.669111	TRUE	3	3	Amp		0.910805	83.8713
30	C6	FALSE	jiruo	18s	UNKNOWN	SYBR	None	7.03348	7.04371	0.0192421								TRUE	0.669111	TRUE	3	3	Amp		0.919444	83.8713
31	C7	FALSE	pi	asb3	UNKNOWN	SYBR	None	24.2551	24.2875	0.0286066								TRUE	0.546931	TRUE	3	17	Amp		0.974881	82.1562
32	C8	FALSE	pi	asb3	UNKNOWN	SYBR	None	24.3092	24.2875	0.0286066								TRUE	0.546931	TRUE	3	18	Amp		0.971782	82.1562
33	C9	FALSE	pi	asb3	UNKNOWN	SYBR	None	24.2983	24.2875	0.0286066								TRUE	0.546931	TRUE	3	18	Amp		0.976985	82.0077
34	C10	FALSE	jiruo	asb3	UNKNOWN	SYBR	None	25.287	25.1365	0.130517								TRUE	0.546931	TRUE	3	18	Amp		0.979109	82.1525
35	C11	FALSE	jiruo	asb3	UNKNOWN	SYBR	None	25.0544	25.1365	0.130517								TRUE	0.546931	TRUE	3	18	Amp		0.966783	82.4639
36	C12	FALSE	jiruo	asb3	UNKNOWN	SYBR	None	25.0681	25.1365	0.130517								TRUE	0.546931	TRUE	3	19	Amp		0.967549	82.4639
37	D1	FALSE	fei	18s	UNKNOWN	SYBR	None	6.12036	6.05322	0.0758335								TRUE	0.669111	TRUE	3	3	Amp		0.894302	83.749
38	D2	FALSE	fei	18s	UNKNOWN	SYBR	None	6.06834	6.05322	0.0758335								TRUE	0.669111	TRUE	3	3	Amp		0.920249	83.749
39	D3	FALSE	fei	18s	UNKNOWN	SYBR	None	5.97097	6.05322	0.0758335								TRUE	0.669111	TRUE	3	3	Amp		0.886397	83.9164
40	D4	FALSE	gaowan	18s	UNKNOWN	SYBR	None	5.89644	5.85433	0.0527692								TRUE	0.669111	TRUE	3	3	Amp		0.905192	83.7715
41	D5	FALSE	gaowan	18s	UNKNOWN	SYBR	None	5.79514	5.85433	0.0527692								TRUE	0.669111	TRUE	3	3	Amp		0.918223	83.8713
42	D6	FALSE	gaowan	18s	UNKNOWN	SYBR	None	5.87143	5.85433	0.0527692								TRUE	0.669111	TRUE	3	3	Amp		0.927797	83.7267
43	D7	FALSE	fei	asb3	UNKNOWN	SYBR	None	23.5507	23.598	0.07526								TRUE	0.546931	TRUE	3	17	Amp		0.921613	82.1562
44	D8	FALSE	fei	asb3	UNKNOWN	SYBR	None	23.5586	23.598	0.07526								TRUE	0.546931	TRUE	3	18	Amp		0.927472	82.301
45	D9	FALSE	fei	asb3	UNKNOWN	SYBR	None	23.6848	23.598	0.07526								TRUE	0.546931	TRUE	3	18	Amp		0.92582	82.1525
46	D10	FALSE	gaowan	asb3	UNKNOWN	SYBR	None	20.9387	20.9198	0.0177467								TRUE	0.546931	TRUE	3	15	Amp		0.907851	82.1525
47	D11	FALSE	gaowan	asb3	UNKNOWN	SYBR	None	20.9173	20.9198	0.0177467								TRUE	0.546931	TRUE	3	15	Amp		0.916291	82.319
48	D12	FALSE	gaowan	asb3	UNKNOWN	SYBR	None	20.9035	20.9198	0.0177467								TRUE	0.546931	TRUE	3	15	Amp		0.916481	82.319
49	E1	FALSE	shen	18s	UNKNOWN	SYBR	None	6.09549	6.03693	0.139294								TRUE	0.669111	TRUE	3	3	Amp		0.877503	83.749
50	E2	FALSE	shen	18s	UNKNOWN	SYBR	None	6.13738	6.03693	0.139294								TRUE	0.669111	TRUE	3	3	Amp		0.885105	83.6042
51	E3	FALSE	shen	18s	UNKNOWN	SYBR	None	5.87791	6.03693	0.139294								TRUE	0.669111	TRUE	3	3	Amp		0.880969	83.9164
52	E4	FALSE	zhifang	18s	UNKNOWN	SYBR	None	6.10686	6.13079	0.0207291								TRUE	0.669111	TRUE	3	3	Amp		0.892247	83.9164
53	E5	FALSE	zhifang	18s	UNKNOWN	SYBR	None	6.14319	6.13079	0.0207291								TRUE	0.669111	TRUE	3	3	Amp		0.882563	83.7267
54	E6	FALSE	zhifang	18s	UNKNOWN	SYBR	None	6.14233	6.13079	0.0207291								TRUE	0.669111	TRUE	3	3	Amp		0.897185	83.7267
55	E7	FALSE	shen	asb3	UNKNOWN	SYBR	None	23.8695	23.8327	0.0485493								TRUE	0.546931	TRUE	3	18	Amp		0.933829	82.0114
56	E8	FALSE	shen	asb3	UNKNOWN	SYBR	None	23.7777	23.8327	0.0485493								TRUE	0.546931	TRUE	3	17	Amp		0.938296	82.1562
57	E9	FALSE	shen	asb3	UNKNOWN	SYBR	None	23.8508	23.8327	0.0485493								TRUE	0.546931	TRUE	3	17	Amp		0.930727	82.1525
58	E10	FALSE	zhifang	asb3	UNKNOWN	SYBR	None	23.444	23.5374	0.084872								TRUE	0.546931	TRUE	3	17	Amp		0.944812	82.2973
59	E11	FALSE	zhifang	asb3	UNKNOWN	SYBR	None	23.5583	23.5374	0.084872								TRUE	0.546931	TRUE	3	17	Amp		0.945622	82.319
60	E12	FALSE	zhifang	asb3	UNKNOWN	SYBR	None	23.6098	23.5374	0.084872								TRUE	0.546931	TRUE	3	17	Amp		0.942908	82.319
61	F1	FALSE	nao	18s	UNKNOWN	SYBR	None	6.15677	6.0765	0.0794208								TRUE	0.669111	TRUE	3	3	Amp		0.943086	83.749
62	F2	FALSE	nao	18s	UNKNOWN	SYBR	None	6.07479	6.0765	0.0794208								TRUE	0.669111	TRUE	3	3	Amp		0.923566	83.749
63	F3	FALSE	nao	18s	UNKNOWN	SYBR	None	5.99795	6.0765	0.0794208								TRUE	0.669111	TRUE	3	3	Amp		0.872374	83.9164
67	F7	FALSE	nao	asb3	UNKNOWN	SYBR	None	22.9132	22.9291	0.0184539								TRUE	0.546931	TRUE	3	17	Amp		0.932362	82.1562
68	F8	FALSE	nao	asb3	UNKNOWN	SYBR	None	22.9493	22.9291	0.0184539								TRUE	0.546931	TRUE	3	17	Amp		0.920743	82.301
69	F9	FALSE	nao	asb3	UNKNOWN	SYBR	None	22.9247	22.9291	0.0184539								TRUE	0.546931	TRUE	3	16	Amp		0.932938	82.1525
73	G1	FALSE	chang	18s	UNKNOWN	SYBR	None	5.41803	5.36401	0.0485348								TRUE	0.669111	TRUE	3	3	Amp		0.902655	83.749
74	G2	FALSE	chang	18s	UNKNOWN	SYBR	None	5.34993	5.36401	0.0485348								TRUE	0.669111	TRUE	3	3	Amp		0.895851	83.8938
75	G3	FALSE	chang	18s	UNKNOWN	SYBR	None	5.32408	5.36401	0.0485348								TRUE	0.669111	TRUE	3	3	Amp		0.879096	84.0614
79	G7	FALSE	chang	asb3	UNKNOWN	SYBR	None	22.9708	22.9721	0.0315915								TRUE	0.546931	TRUE	3	17	Amp		0.883485	82.1562
80	G8	FALSE	chang	asb3	UNKNOWN	SYBR	None	22.9412	22.9721	0.0315915								TRUE	0.546931	TRUE	3	17	Amp		0.884007	82.301
81	G9	FALSE	chang	asb3	UNKNOWN	SYBR	None	23.0044	22.9721	0.0315915								TRUE	0.546931	TRUE	3	17	Amp		0.882113	82.2973
85	H1	FALSE	wei	18s	UNKNOWN	SYBR	None	6.1896	6.13467	0.0527091								TRUE	0.669111	TRUE	3	3	Amp		0.95768	83.8938
86	H2	FALSE	wei	18s	UNKNOWN	SYBR	None	6.08451	6.13467	0.0527091								TRUE	0.669111	TRUE	3	3	Amp		0.920563	83.8938
87	H3	FALSE	wei	18s	UNKNOWN	SYBR	None	6.12989	6.13467	0.0527091								TRUE	0.669111	TRUE	3	3	Amp		0.9281	84.0614
91	H7	FALSE	wei	asb3	UNKNOWN	SYBR	None	23.8417	23.9233	0.103564								TRUE	0.546931	TRUE	3	17	Amp		0.93929	82.301
92	H8	FALSE	wei	asb3	UNKNOWN	SYBR	None	24.0398	23.9233	0.103564								TRUE	0.546931	TRUE	3	18	Amp		0.915591	82.1562
93	H9	FALSE	wei	asb3	UNKNOWN	SYBR	None	23.8884	23.9233	0.103564								TRUE	0.546931	TRUE	3	17	Amp		0.937539	82.2973

## Sheet: Melt Curve Raw Data
Block Type	96-Well 0.2-mL Block
Calibration Background is expired	No
Calibration Background performed on	08-01-2022
Calibration Pure Dye ABY is expired	No
Calibration Pure Dye ABY performed on	08-01-2022
Calibration Pure Dye CY5 is expired	No
Calibration Pure Dye CY5 performed on	08-01-2022
Calibration Pure Dye FAM is expired	No
Calibration Pure Dye FAM performed on	08-01-2022
Calibration Pure Dye JUN is expired	No
Calibration Pure Dye JUN performed on	08-01-2022
Calibration Pure Dye MUSTANG PURPLE is expired	No
Calibration Pure Dye MUSTANG PURPLE performed on	08-01-2022
Calibration Pure Dye NED is expired	No
Calibration Pure Dye NED performed on	08-01-2022
Calibration Pure Dye ROX is expired	No
Calibration Pure Dye ROX performed on	08-01-2022
Calibration Pure Dye SYBR is expired	No
Calibration Pure Dye SYBR performed on	08-01-2022
Calibration Pure Dye TAMRA is expired	No
Calibration Pure Dye TAMRA performed on	08-01-2022
Calibration Pure Dye VIC is expired	No
Calibration Pure Dye VIC performed on	08-01-2022
Calibration ROI is expired	No
Calibration ROI performed on	08-01-2022
Calibration Uniformity is expired	No
Calibration Uniformity performed on	08-01-2022
Chemistry	SYBR_GREEN
Date Created	2023-12-01 04:10:17 AM CST
Experiment Barcode
Experiment Comment
Experiment File Name	D:\datas\huang lab\qxy\2023-12-01_023705.eds
Experiment Name	2023-12-01_023705
Experiment Run End Time	2023-12-01 01:07:46 AM CST
Experiment Type	Standard Curve
Instrument Name	272520824
Instrument Serial Number	272520824
Instrument Type	QuantStudio™ 5 System
Passive Reference	ROX
Post-read Stage/Step
Pre-read Stage/Step
Quantification Cycle Method	Ct
Signal Smoothing On	true
Stage where Melt Analysis is performed	Stage3
Stage/ Cycle where Ct Analysis is performed	Stage2, Step2
User Name
Well	Well Position	Reading	Temperature	Fluorescence	Derivative	Target Name
1	A1	1	60.0014	1.33692e+06	37334.2	18s
1	A1	2	60.291	1.32759e+06	37484.4	18s
1	A1	3	60.5806	1319511	37623.8	18s
1	A1	4	60.8702	1.30829e+06	37650.9	18s
1	A1	5	61.1598	1.29665e+06	37513.7	18s
1	A1	6	61.4494	1285316	37227.1	18s
1	A1	7	61.739	1.27543e+06	36856.3	18s
1	A1	8	62.0286	1.26358e+06	36481.3	18s
1	A1	9	62.3182	1251996	36163.8	18s
1	A1	10	62.6078	1.2429e+06	35930.1	18s
1	A1	11	62.8975	1.23125e+06	35769.2	18s
1	A1	12	63.1871	1.22013e+06	35645.9	18s
1	A1	13	63.4767	1.20905e+06	35518	18s
1	A1	14	63.7663	1.19775e+06	35354.4	18s
1	A1	15	64.0559	1.18798e+06	35146.5	18s
1	A1	16	64.3455	1.17558e+06	34912.5	18s
1	A1	17	64.6351	1.16516e+06	34690.4	18s
1	A1	18	64.9247	1.15545e+06	34520.8	18s
1	A1	19	65.2143	1.14597e+06	34428.9	18s
1	A1	20	65.5039	1.13509e+06	34412.8	18s
1	A1	21	65.7935	1.12404e+06	34445.4	18s
1	A1	22	66.0831	1.11419e+06	34487.5	18s
1	A1	23	66.3727	1.10413e+06	34506.4	18s
1	A1	24	66.6623	1.09202e+06	34486.4	18s
1	A1	25	66.9519	1.08108e+06	34428.9	18s
1	A1	26	67.2415	1.07225e+06	34338.9	18s
1	A1	27	67.5311	1.06119e+06	34211.9	18s
1	A1	28	67.8207	1.05136e+06	34029.5	18s
1	A1	29	68.1103	1.03987e+06	33773.6	18s
1	A1	30	68.3999	1028368	33447.6	18s
1	A1	31	68.6896	1.01967e+06	33088.5	18s
1	A1	32	68.9792	1.01018e+06	32753.4	18s
1	A1	33	69.2688	1.00023e+06	32491.5	18s
1	A1	34	69.5584	992120	32317.3	18s
1	A1	35	69.848	980098	32206.8	18s
1	A1	36	70.1376	970684	32119.8	18s
1	A1	37	70.4272	960636	32017.6	18s
1	A1	38	70.7168	951448	31883.4	18s
1	A1	39	71.0064	941151	31724	18s
1	A1	40	71.296	931879	31557.5	18s
1	A1	41	71.5856	922383	31399.2	18s
1	A1	42	71.8752	913268	31254.6	18s
1	A1	43	72.1648	902930	31118.9	18s
1	A1	44	72.4544	894327	30980	18s
1	A1	45	72.744	885469	30824.2	18s
1	A1	46	73.0336	874468	30642.3	18s
1	A1	47	73.3232	866720	30433.8	18s
1	A1	48	73.6128	857601	30208.8	18s
1	A1	49	73.9024	847747	29986.2	18s
1	A1	50	74.192	839903	29789.5	18s
1	A1	51	74.4817	830897	29640.1	18s
1	A1	52	74.7713	821812	29553.3	18s
1	A1	53	75.0609	812918	29533.2	18s
1	A1	54	75.3505	804279	29570.9	18s
1	A1	55	75.6401	795689	29644.6	18s
1	A1	56	75.9297	785948	29724.2	18s
1	A1	57	76.2193	775825	29783.9	18s
1	A1	58	76.5089	767318	29813.5	18s
1	A1	59	76.7985	759094	29825.9	18s
1	A1	60	77.0881	748485	29853.6	18s
1	A1	61	77.3777	739534	29940.2	18s
1	A1	62	77.6673	730052	30130.8	18s
1	A1	63	77.9569	720515	30470.3	18s
1	A1	64	78.2465	710955	31005.1	18s
1	A1	65	78.5361	701072	31785.4	18s
1	A1	66	78.8257	691602	32920.2	18s
1	A1	67	79.1153	681419	34457.3	18s
1	A1	68	79.4049	669740	36396.3	18s
1	A1	69	79.6945	657014	38742.5	18s
1	A1	70	79.9841	645381	41482.2	18s
1	A1	71	80.2738	629486	44603.2	18s
1	A1	72	80.5634	614683	48128.8	18s
1	A1	73	80.853	599479	52151.6	18s
1	A1	74	81.1426	581771	56862.5	18s
1	A1	75	81.4322	563236	62565.3	18s
1	A1	76	81.7218	541038	69673.4	18s
1	A1	77	82.0114	518329	78666.5	18s
1	A1	78	82.301	491519	89980.7	18s
1	A1	79	82.5906	461769	103803	18s
1	A1	80	82.8802	422698	119793	18s
1	A1	81	83.1698	370816	136825	18s
1	A1	82	83.4594	306099	152916	18s
1	A1	83	83.749	233953	165465	18s
1	A1	84	84.0386	166773	171847	18s
1	A1	85	84.3282	113819	170164	18s
1	A1	86	84.6178	75936.2	159894	18s
1	A1	87	84.9074	53023.7	142115	18s
1	A1	88	85.197	40918.5	119240	18s
1	A1	89	85.4866	34838.2	94330.4	18s
1	A1	90	85.7762	31298.1	70318.6	18s
1	A1	91	86.0659	29398.3	49385.6	18s
1	A1	92	86.3555	29749.5	32684.7	18s
1	A1	93	86.6451	27821.5	21286.4	18s
1	A1	94	86.9347	27370	13539.6	18s
1	A1	95	87.2243	26234.7	8609.02	18s
1	A1	96	87.5139	24488.1	5645.13	18s
1	A1	97	87.8035	26049.2	3922.78	18s
1	A1	98	88.0931	23969.1	2919.29	18s
1	A1	99	88.3827	25587.5	2313.52	18s
1	A1	100	88.6723	23751.2	1936.85	18s
1	A1	101	88.9619	23447.1	1708.81	18s
1	A1	102	89.2515	23110.3	1583.95	18s
1	A1	103	89.5411	22527.9	1523.4	18s
1	A1	104	89.8307	22425.8	1489.4	18s
1	A1	105	90.1203	21897.8	1450.8	18s
1	A1	106	90.4099	21022.5	1388.41	18s
1	A1	107	90.6995	21634.9	1295.43	18s
1	A1	108	90.9891	20701.8	1175.14	18s
1	A1	109	91.2787	21254.7	1038.35	18s
1	A1	110	91.5683	21289	900.711	18s
1	A1	111	91.858	20218.6	778.883	18s
1	A1	112	92.1476	20499.6	685.959	18s
1	A1	113	92.4372	21089.9	628.734	18s
1	A1	114	92.7268	19815.5	607.639	18s
1	A1	115	93.0164	20634.2	617.568	18s
1	A1	116	93.306	19649	647.455	18s
1	A1	117	93.5956	17608.6	679.67	18s
1	A1	118	93.8852	20548.9	693.166	18s
1	A1	119	94.1748	19207.8	671.787	18s
1	A1	120	94.4644	20242.6	613.115	18s
1	A1	121	94.754	19338	530.441	18s
2	A2	1	60.0014	1.50637e+06	44566.6	18s
2	A2	2	60.291	1.49244e+06	44706.6	18s
2	A2	3	60.5806	1.48179e+06	44833.7	18s
2	A2	4	60.8702	1.47075e+06	44842.9	18s
2	A2	5	61.1598	1.45797e+06	44673.8	18s
2	A2	6	61.4494	1.44307e+06	44327.3	18s
2	A2	7	61.739	1.43228e+06	43855	18s
2	A2	8	62.0286	1.41722e+06	43337.9	18s
2	A2	9	62.3182	1.40485e+06	42861.2	18s
2	A2	10	62.6078	1.39121e+06	42487.9	18s
2	A2	11	62.8975	1.38013e+06	42239.7	18s
2	A2	12	63.1871	1.36848e+06	42091.3	18s
2	A2	13	63.4767	1.35425e+06	41989	18s
2	A2	14	63.7663	1.34069e+06	41880.1	18s
2	A2	15	64.0559	1.32737e+06	41740.9	18s
2	A2	16	64.3455	1316645	41581.2	18s
2	A2	17	64.6351	1.303e+06	41424.7	18s
2	A2	18	64.9247	1290825	41286.4	18s
2	A2	19	65.2143	1.27972e+06	41157.8	18s
2	A2	20	65.5039	1.26674e+06	41012.5	18s
2	A2	21	65.7935	1.25268e+06	40822.6	18s
2	A2	22	66.0831	1.24282e+06	40579.5	18s
2	A2	23	66.3727	1229343	40299.6	18s
2	A2	24	66.6623	1.21573e+06	40020.3	18s
2	A2	25	66.9519	1.20634e+06	39779.3	18s
2	A2	26	67.2415	1.19406e+06	39596.8	18s
2	A2	27	67.5311	1.18104e+06	39467.2	18s
2	A2	28	67.8207	1.17083e+06	39366.2	18s
2	A2	29	68.1103	1.15629e+06	39266.5	18s
2	A2	30	68.3999	1.14595e+06	39150.1	18s
2	A2	31	68.6896	1.13529e+06	39008.5	18s
2	A2	32	68.9792	1.1224e+06	38835.7	18s
2	A2	33	69.2688	1.11057e+06	38624.4	18s
2	A2	34	69.5584	1.09952e+06	38370.2	18s
2	A2	35	69.848	1.08765e+06	38082.8	18s
2	A2	36	70.1376	1.07608e+06	37794.4	18s
2	A2	37	70.4272	1.06447e+06	37546	18s
2	A2	38	70.7168	1.05487e+06	37365.7	18s
2	A2	39	71.0064	1.04383e+06	37261	18s
2	A2	40	71.296	1.03133e+06	37206	18s
2	A2	41	71.5856	1.02044e+06	37151.6	18s
2	A2	42	71.8752	1.00869e+06	37047.7	18s
2	A2	43	72.1648	997814	36865.1	18s
2	A2	44	72.4544	987043	36603.8	18s
2	A2	45	72.744	976443	36287.7	18s
2	A2	46	73.0336	965121	35952.2	18s
2	A2	47	73.3232	955372	35629.9	18s
2	A2	48	73.6128	945062	35342.5	18s
2	A2	49	73.9024	934493	35097	18s
2	A2	50	74.192	923855	34886.6	18s
2	A2	51	74.4817	913513	34695.8	18s
2	A2	52	74.7713	904485	34509.5	18s
2	A2	53	75.0609	891946	34321.7	18s
2	A2	54	75.3505	882887	34141.2	18s
2	A2	55	75.6401	872694	33990.2	18s
2	A2	56	75.9297	862848	33895.6	18s
2	A2	57	76.2193	853655	33875.4	18s
2	A2	58	76.5089	842442	33930.9	18s
2	A2	59	76.7985	830526	34049.8	18s
2	A2	60	77.0881	821692	34217.4	18s
2	A2	61	77.3777	811161	34432.6	18s
2	A2	62	77.6673	797430	34719.4	18s
2	A2	63	77.9569	788530	35131.9	18s
2	A2	64	78.2465	777715	35751	18s
2	A2	65	78.5361	767153	36669.6	18s
2	A2	66	78.8257	756528	37968.8	18s
2	A2	67	79.1153	743291	39740.3	18s
2	A2	68	79.4049	729575	41946.8	18s
2	A2	69	79.6945	716409	44556.6	18s
2	A2	70	79.9841	701183	47536.3	18s
2	A2	71	80.2738	685922	50884	18s
2	A2	72	80.5634	668888	54656.2	18s
2	A2	73	80.853	650058	58991.4	18s
2	A2	74	81.1426	630248	64131.3	18s
2	A2	75	81.4322	610675	70437.6	18s
2	A2	76	81.7218	587215	78383.2	18s
2	A2	77	82.0114	560209	88494.6	18s
2	A2	78	82.301	528822	101215	18s
2	A2	79	82.5906	495180	116681	18s
2	A2	80	82.8802	450198	134435	18s
2	A2	81	83.1698	393089	153174	18s
2	A2	82	83.4594	320115	170696	18s
2	A2	83	83.749	239940	184167	18s
2	A2	84	84.0386	165177	190753	18s
2	A2	85	84.3282	107182	188434	18s
2	A2	86	84.6178	63381.8	176693	18s
2	A2	87	84.9074	41163.4	156776	18s
2	A2	88	85.197	25891.2	131382	18s
2	A2	89	85.4866	21076.7	103915	18s
2	A2	90	85.7762	17251.9	77604.4	18s
2	A2	91	86.0659	14137.6	54815.9	18s
2	A2	92	86.3555	12130.5	36778	18s
2	A2	93	86.6451	11708	23913.9	18s
2	A2	94	86.9347	10214.4	15121.4	18s
2	A2	95	87.2243	9643.94	9451.44	18s
2	A2	96	87.5139	8796.99	5942.52	18s
2	A2	97	87.8035	8062.72	3803.52	18s
2	A2	98	88.0931	7973.33	2472.38	18s
2	A2	99	88.3827	7741.77	1596.46	18s
2	A2	100	88.6723	7230.87	981.406	18s
2	A2	101	88.9619	7779.27	537.293	18s
2	A2	102	89.2515	8350.86	231.965	18s
2	A2	103	89.5411	6774.12	53.2305	18s
2	A2	104	89.8307	6475.09	-18.0156	18s
2	A2	105	90.1203	5806.01	-18.3984	18s
2	A2	106	90.4099	5565.81	6.33984	18s
2	A2	107	90.6995	6677.15	21.9258	18s
2	A2	108	90.9891	6119.59	22.0781	18s
2	A2	109	91.2787	5584.62	26.4531	18s
2	A2	110	91.5683	4642.77	59.4648	18s
2	A2	111	91.858	4644.02	125.102	18s
2	A2	112	92.1476	3045.31	196.945	18s
2	A2	113	92.4372	3748.93	231.102	18s
2	A2	114	92.7268	3582.56	193.23	18s
2	A2	115	93.0164	3976.16	81.3203	18s
2	A2	116	93.306	4051.16	-70.4375	18s
2	A2	117	93.5956	3432.06	-208.957	18s
2	A2	118	93.8852	4110.05	-290.234	18s
2	A2	119	94.1748	3318.65	-301.336	18s
2	A2	120	94.4644	1667.53	-263.879	18s
2	A2	121	94.754	2213	-218.258	18s
3	A3	1	60.0011	1.48131e+06	38932.5	18s
3	A3	2	60.291	1.47124e+06	39182.3	18s
3	A3	3	60.5809	1.45902e+06	39403	18s
3	A3	4	60.8708	1.45086e+06	39512.6	18s
3	A3	5	61.1606	1.43823e+06	39482.7	18s
3	A3	6	61.4505	1425542	39340.4	18s
3	A3	7	61.7404	1.41514e+06	39145.1	18s
3	A3	8	62.0303	1.40278e+06	38952.9	18s
3	A3	9	62.3202	1391109	38793.3	18s
3	A3	10	62.61	1380161	38669.2	18s
3	A3	11	62.8999	1.36636e+06	38569.6	18s
3	A3	12	63.1898	1.35504e+06	38484.9	18s
3	A3	13	63.4797	1.34364e+06	38413	18s
3	A3	14	63.7696	1.3312e+06	38358	18s
3	A3	15	64.0595	1.32043e+06	38323.6	18s
3	A3	16	64.3493	1.30702e+06	38306.5	18s
3	A3	17	64.6392	1.29641e+06	38292.1	18s
3	A3	18	64.9291	1.28527e+06	38255	18s
3	A3	19	65.219	1.27294e+06	38167.6	18s
3	A3	20	65.5089	1.26133e+06	38013.4	18s
3	A3	21	65.7988	1.24782e+06	37800.6	18s
3	A3	22	66.0886	1.23908e+06	37567	18s
3	A3	23	66.3785	1.22649e+06	37366.6	18s
3	A3	24	66.6684	1.21441e+06	37246.9	18s
3	A3	25	66.9583	1.20537e+06	37228.1	18s
3	A3	26	67.2482	1.19262e+06	37291.5	18s
3	A3	27	67.5381	1.18042e+06	37387.4	18s
3	A3	28	67.8279	1.17058e+06	37453.1	18s
3	A3	29	68.1178	1.15712e+06	37439.2	18s
3	A3	30	68.4077	1.1455e+06	37325.4	18s
3	A3	31	68.6976	1.13556e+06	37127.3	18s
3	A3	32	68.9875	1.12325e+06	36884.8	18s
3	A3	33	69.2774	1.11244e+06	36641.8	18s
3	A3	34	69.5672	1.10241e+06	36427.3	18s
3	A3	35	69.8571	1.09117e+06	36250.8	18s
3	A3	36	70.147	1079156	36092.2	18s
3	A3	37	70.4369	1.06841e+06	35933.7	18s
3	A3	38	70.7268	1.05759e+06	35770.7	18s
3	A3	39	71.0167	1.04594e+06	35615.7	18s
3	A3	40	71.3065	1.03732e+06	35490.3	18s
3	A3	41	71.5964	1.02512e+06	35408.9	18s
3	A3	42	71.8863	1.01467e+06	35369.9	18s
3	A3	43	72.1762	1.00306e+06	35355.9	18s
3	A3	44	72.4661	993116	35341.8	18s
3	A3	45	72.756	982848	35302.9	18s
3	A3	46	73.0458	972340	35217.7	18s
3	A3	47	73.3357	960248	35071.3	18s
3	A3	48	73.6256	950377	34862.8	18s
3	A3	49	73.9155	939962	34611.1	18s
3	A3	50	74.2054	930166	34355	18s
3	A3	51	74.4952	920646	34139.7	18s
3	A3	52	74.7851	909948	33997.4	18s
3	A3	53	75.075	899502	33933.1	18s
3	A3	54	75.3649	889488	33926.8	18s
3	A3	55	75.6548	878796	33947.3	18s
3	A3	56	75.9447	868078	33972.6	18s
3	A3	57	76.2345	857892	34002.5	18s
3	A3	58	76.5244	848167	34057.8	18s
3	A3	59	76.8143	838206	34169.6	18s
3	A3	60	77.1042	826106	34365.7	18s
3	A3	61	77.3941	814198	34669.1	18s
3	A3	62	77.684	804357	35107.7	18s
3	A3	63	77.9738	792563	35728.2	18s
3	A3	64	78.2637	781845	36608.6	18s
3	A3	65	78.5536	769345	37860.6	18s
3	A3	66	78.8435	757962	39539.1	18s
3	A3	67	79.1334	743959	41687.3	18s
3	A3	68	79.4233	729071	44305.4	18s
3	A3	69	79.7131	712560	47362.1	18s
3	A3	70	80.003	696535	50825.7	18s
3	A3	71	80.2929	678741	54705.4	18s
3	A3	72	80.5828	659265	59092	18s
3	A3	73	80.8727	638512	64188.4	18s
3	A3	74	81.1626	617285	70322.7	18s
3	A3	75	81.4524	590934	77938	18s
3	A3	76	81.7423	563074	87542.4	18s
3	A3	77	82.0322	529325	99596.7	18s
3	A3	78	82.3221	492425	114318	18s
3	A3	79	82.612	441500	131411	18s
3	A3	80	82.9019	377956	149802	18s
3	A3	81	83.1917	302124	167523	18s
3	A3	82	83.4816	220079	181895	18s
3	A3	83	83.7715	148545	190059	18s
3	A3	84	84.0614	94206.9	189762	18s
3	A3	85	84.3513	58100.6	180096	18s
3	A3	86	84.6412	39670.3	161879	18s
3	A3	87	84.931	28562.6	137493	18s
3	A3	88	85.2209	23042.9	110229	18s
3	A3	89	85.5108	21167.1	83409.6	18s
3	A3	90	85.8007	18086.8	59631.4	18s
3	A3	91	86.0906	17426.1	40364.9	18s
3	A3	92	86.3804	16413.4	26290.8	18s
3	A3	93	86.6703	14873.6	16588.2	18s
3	A3	94	86.9602	15010.3	10253.3	18s
3	A3	95	87.2501	14542.8	6325.3	18s
3	A3	96	87.54	14069	3975.45	18s
3	A3	97	87.8299	14615.5	2593.5	18s
3	A3	98	88.1198	13148.3	1783.01	18s
3	A3	99	88.4096	12920.4	1309.89	18s
3	A3	100	88.6995	13126.5	1041.98	18s
3	A3	101	88.9894	12761.3	901.891	18s
3	A3	102	89.2793	12139	838.164	18s
3	A3	103	89.5692	10922.4	810.508	18s
3	A3	104	89.859	10886.1	783.168	18s
3	A3	105	90.1489	11126.6	725.465	18s
3	A3	106	90.4388	11593.1	619.102	18s
3	A3	107	90.7287	10952.3	467.359	18s
3	A3	108	91.0186	11025.4	297.473	18s
3	A3	109	91.3085	11180.4	150.672	18s
3	A3	110	91.5983	11162.2	63.5742	18s
3	A3	111	91.8882	9577.86	50.8867	18s
3	A3	112	92.1781	9530.06	98.3945	18s
3	A3	113	92.468	10190.5	168.863	18s
3	A3	114	92.7579	9250.31	217.586	18s
3	A3	115	93.0478	9708.15	210.516	18s
3	A3	116	93.3376	9901.55	137.242	18s
3	A3	117	93.6275	10188.6	13.1016	18s
3	A3	118	93.9174	9264.05	-129.93	18s
3	A3	119	94.2073	9845.63	-258.125	18s
3	A3	120	94.4972	10301.2	-349.078	18s
3	A3	121	94.7871	10036.2	-397.555	18s
4	A4	1	60.0011	1.33375e+06	34553.4	18s
4	A4	2	60.291	1.32417e+06	34806.8	18s
4	A4	3	60.5809	1.31532e+06	35039.6	18s
4	A4	4	60.8708	1.30579e+06	35176.2	18s
4	A4	5	61.1606	1.29564e+06	35181.8	18s
4	A4	6	61.4505	1.28441e+06	35070.4	18s
4	A4	7	61.7404	1.27555e+06	34885.7	18s
4	A4	8	62.0303	1.2642e+06	34678	18s
4	A4	9	62.3202	1.25273e+06	34486.9	18s
4	A4	10	62.61	1.24376e+06	34334.9	18s
4	A4	11	62.8999	1.23284e+06	34232	18s
4	A4	12	63.1898	1.22259e+06	34180.9	18s
4	A4	13	63.4797	1.21097e+06	34180.5	18s
4	A4	14	63.7696	1201227	34226.6	18s
4	A4	15	64.0595	1.19198e+06	34305.4	18s
4	A4	16	64.3493	1.1799e+06	34389.2	18s
4	A4	17	64.6392	1.1707e+06	34440.8	18s
4	A4	18	64.9291	1.15897e+06	34422.6	18s
4	A4	19	65.219	1.14849e+06	34312.6	18s
4	A4	20	65.5089	1.13924e+06	34115.3	18s
4	A4	21	65.7988	1.12689e+06	33863.5	18s
4	A4	22	66.0886	1.11764e+06	33606.4	18s
4	A4	23	66.3785	1.10866e+06	33391.7	18s
4	A4	24	66.6684	1.0983e+06	33248.4	18s
4	A4	25	66.9583	1.08726e+06	33177.5	18s
4	A4	26	67.2482	1078095	33155.5	18s
4	A4	27	67.5381	1.06738e+06	33145.3	18s
4	A4	28	67.8279	1.05758e+06	33109.4	18s
4	A4	29	68.1178	1.0476e+06	33020.2	18s
4	A4	30	68.4077	1.03678e+06	32868.3	18s
4	A4	31	68.6976	1.02718e+06	32665.1	18s
4	A4	32	68.9875	1.0174e+06	32440.6	18s
4	A4	33	69.2774	1.00865e+06	32232.1	18s
4	A4	34	69.5672	998124	32071.8	18s
4	A4	35	69.8571	989299	31977.1	18s
4	A4	36	70.147	979792	31948.1	18s
4	A4	37	70.4369	969274	31967.3	18s
4	A4	38	70.7268	960090	32009	18s
4	A4	39	71.0167	950168	32045.5	18s
4	A4	40	71.3065	940587	32052	18s
4	A4	41	71.5964	929946	32009	18s
4	A4	42	71.8863	921203	31906.2	18s
4	A4	43	72.1762	910985	31745.7	18s
4	A4	44	72.4661	901133	31541.4	18s
4	A4	45	72.756	893643	31313.8	18s
4	A4	46	73.0458	883832	31083	18s
4	A4	47	73.3357	874001	30864.3	18s
4	A4	48	73.6256	864952	30670.4	18s
4	A4	49	73.9155	856064	30512.6	18s
4	A4	50	74.2054	848686	30400.4	18s
4	A4	51	74.4952	838215	30335.5	18s
4	A4	52	74.7851	829181	30308.2	18s
4	A4	53	75.075	819509	30299.2	18s
4	A4	54	75.3649	811528	30292.3	18s
4	A4	55	75.6548	801487	30282.4	18s
4	A4	56	75.9447	793016	30276.6	18s
4	A4	57	76.2345	784738	30285.9	18s
4	A4	58	76.5244	773472	30318.6	18s
4	A4	59	76.8143	765654	30379.8	18s
4	A4	60	77.1042	755103	30481	18s
4	A4	61	77.3941	745849	30651	18s
4	A4	62	77.684	736393	30940.7	18s
4	A4	63	77.9738	726834	31418	18s
4	A4	64	78.2637	716980	32153.5	18s
4	A4	65	78.5536	706522	33189	18s
4	A4	66	78.8435	695294	34569.8	18s
4	A4	67	79.1334	683840	36305.9	18s
4	A4	68	79.4233	671115	38391.1	18s
4	A4	69	79.7131	658095	40816	18s
4	A4	70	80.003	643511	43583.8	18s
4	A4	71	80.2929	627526	46729	18s
4	A4	72	80.5828	611553	50339.2	18s
4	A4	73	80.8727	595274	54576.7	18s
4	A4	74	81.1626	574169	59700.2	18s
4	A4	75	81.4524	551856	66073.6	18s
4	A4	76	81.7423	527790	74149.9	18s
4	A4	77	82.0322	501399	84394.8	18s
4	A4	78	82.3221	468697	97118.6	18s
4	A4	79	82.612	424966	112215	18s
4	A4	80	82.9019	368236	128882	18s
4	A4	81	83.1917	298848	145459	18s
4	A4	82	83.4816	222531	159554	18s
4	A4	83	83.7715	155377	168506	18s
4	A4	84	84.0614	101643	170111	18s
4	A4	85	84.3513	67767.3	163320	18s
4	A4	86	84.6412	46373.7	148636	18s
4	A4	87	84.931	35477.8	128014	18s
4	A4	88	85.2209	28660.8	104305	18s
4	A4	89	85.5108	24644.4	80480.2	18s
4	A4	90	85.8007	23315.1	58947.5	18s
4	A4	91	86.0906	21951.4	41163.4	18s
4	A4	92	86.3804	20548.9	27530.9	18s
4	A4	93	86.6703	19964.6	17762.2	18s
4	A4	94	86.9602	18975.6	11283.9	18s
4	A4	95	87.2501	18496.8	7240.92	18s
4	A4	96	87.54	17574.2	4845.36	18s
4	A4	97	87.8299	17125.1	3473.57	18s
4	A4	98	88.1198	16062.4	2684.95	18s
4	A4	99	88.4096	15345.1	2197.41	18s
4	A4	100	88.6995	16214.6	1849.49	18s
4	A4	101	88.9894	15459	1565.14	18s
4	A4	102	89.2793	15373.1	1324.12	18s
4	A4	103	89.5692	14806.8	1134.72	18s
4	A4	104	89.859	13590.1	1008.15	18s
4	A4	105	90.1489	14016.1	940.387	18s
4	A4	106	90.4388	12812.7	908.404	18s
4	A4	107	90.7287	13667.6	881.035	18s
4	A4	108	91.0186	13414.3	835.613	18s
4	A4	109	91.3085	12109.4	768.346	18s
4	A4	110	91.5983	12555.3	692.113	18s
4	A4	111	91.8882	12632	624.852	18s
4	A4	112	92.1781	11800.8	577.389	18s
4	A4	113	92.468	10971.9	547.91	18s
4	A4	114	92.7579	11499.2	524.434	18s
4	A4	115	93.0478	11628.9	492.113	18s
4	A4	116	93.3376	11581.9	440.953	18s
4	A4	117	93.6275	9966.3	370.105	18s
4	A4	118	93.9174	11405.1	286.887	18s
4	A4	119	94.2073	10867.2	201.475	18s
4	A4	120	94.4972	11516.8	121.178	18s
4	A4	121	94.7871	10706.9	48.0625	18s
5	A5	1	60.0013	1.31944e+06	34539.9	18s
5	A5	2	60.2906	1.31011e+06	34712.4	18s
5	A5	3	60.58	1.3e+06	34883.5	18s
5	A5	4	60.8693	1.29264e+06	34995.6	18s
5	A5	5	61.1586	1.28137e+06	35022	18s
5	A5	6	61.448	1.27092e+06	34965.8	18s
5	A5	7	61.7373	1.26133e+06	34843.8	18s
5	A5	8	62.0266	1.25078e+06	34673.5	18s
5	A5	9	62.316	1.23975e+06	34473.1	18s
5	A5	10	62.6053	1228260	34267.3	18s
5	A5	11	62.8946	1.21769e+06	34087.1	18s
5	A5	12	63.184	1.20818e+06	33958.1	18s
5	A5	13	63.4733	1.19876e+06	33887.7	18s
5	A5	14	63.7626	1.18713e+06	33861.8	18s
5	A5	15	64.052	1.1762e+06	33853.6	18s
5	A5	16	64.3413	1.16666e+06	33835.8	18s
5	A5	17	64.6306	1.15591e+06	33789.9	18s
5	A5	18	64.92	1.14562e+06	33705.9	18s
5	A5	19	65.2093	1.13536e+06	33581.1	18s
5	A5	20	65.4986	1.12556e+06	33419.7	18s
5	A5	21	65.788	1.11434e+06	33235.9	18s
5	A5	22	66.0773	1.10505e+06	33052.6	18s
5	A5	23	66.3666	1.09455e+06	32896.3	18s
5	A5	24	66.656	1.08465e+06	32783.3	18s
5	A5	25	66.9453	1.07492e+06	32709.5	18s
5	A5	26	67.2346	1.06583e+06	32649.1	18s
5	A5	27	67.524	1.05446e+06	32569.9	18s
5	A5	28	67.8133	1.04409e+06	32453.5	18s
5	A5	29	68.1026	1.03329e+06	32309.5	18s
5	A5	30	68.392	1.02571e+06	32169.2	18s
5	A5	31	68.6813	1.01589e+06	32063.8	18s
5	A5	32	68.9706	1.00517e+06	32002.7	18s
5	A5	33	69.26	996916	31965.5	18s
5	A5	34	69.5493	986013	31914.9	18s
5	A5	35	69.8386	976077	31817.8	18s
5	A5	36	70.128	966522	31662.6	18s
5	A5	37	70.4173	956428	31463.6	18s
5	A5	38	70.7066	947733	31249.9	18s
5	A5	39	70.996	937897	31049.7	18s
5	A5	40	71.2853	929488	30879.1	18s
5	A5	41	71.5746	918513	30740.6	18s
5	A5	42	71.864	910196	30629.8	18s
5	A5	43	72.1533	900396	30542.3	18s
5	A5	44	72.4426	892375	30474.9	18s
5	A5	45	72.732	882618	30422	18s
5	A5	46	73.0213	873031	30372.2	18s
5	A5	47	73.3106	864509	30309.7	18s
5	A5	48	73.6	855526	30219.1	18s
5	A5	49	73.8893	845743	30092.1	18s
5	A5	50	74.1786	836338	29929.9	18s
5	A5	51	74.468	828909	29743.9	18s
5	A5	52	74.7573	819286	29550.6	18s
5	A5	53	75.0466	809599	29368.6	18s
5	A5	54	75.336	802088	29216.5	18s
5	A5	55	75.6253	792614	29112.2	18s
5	A5	56	75.9146	784259	29070.2	18s
5	A5	57	76.204	774890	29099.1	18s
5	A5	58	76.4933	767239	29199.6	18s
5	A5	59	76.7826	757838	29366.7	18s
5	A5	60	77.072	746914	29599.4	18s
5	A5	61	77.3613	738371	29910.7	18s
5	A5	62	77.6507	729167	30333.4	18s
5	A5	63	77.94	719706	30916	18s
5	A5	64	78.2293	709430	31711.8	18s
5	A5	65	78.5186	699982	32767.7	18s
5	A5	66	78.808	688533	34121.2	18s
5	A5	67	79.0973	679413	35802.2	18s
5	A5	68	79.3867	666152	37834	18s
5	A5	69	79.676	654352	40236.3	18s
5	A5	70	79.9653	641917	43025.8	18s
5	A5	71	80.2547	627045	46228.4	18s
5	A5	72	80.544	609880	49903.8	18s
5	A5	73	80.8333	595112	54182.3	18s
5	A5	74	81.1227	576479	59303.6	18s
5	A5	75	81.412	556573	65636.4	18s
5	A5	76	81.7013	535198	73654.8	18s
5	A5	77	81.9907	511453	83838.4	18s
5	A5	78	82.28	483136	96481.4	18s
5	A5	79	82.5693	449918	111428	18s
5	A5	80	82.8587	405207	127816	18s
5	A5	81	83.148	348610	143954	18s
5	A5	82	83.4373	278890	157481	18s
5	A5	83	83.7267	207938	165830	18s
5	A5	84	84.016	142668	166917	18s
5	A5	85	84.3053	91837.5	159795	18s
5	A5	86	84.5947	56942	145016	18s
5	A5	87	84.884	37746.6	124516	18s
5	A5	88	85.1733	27075.2	101087	18s
5	A5	89	85.4627	21897.2	77632.1	18s
5	A5	90	85.752	16717.6	56499.9	18s
5	A5	91	86.0413	15689.2	39109.8	18s
5	A5	92	86.3307	15243.5	25908.9	18s
5	A5	93	86.62	14390.3	16601.6	18s
5	A5	94	86.9093	12313.4	10467.9	18s
5	A5	95	87.1987	11254.6	6654.18	18s
5	A5	96	87.488	12710.6	4384.76	18s
5	A5	97	87.7773	10200.4	3062.16	18s
5	A5	98	88.0667	10826.8	2282.69	18s
5	A5	99	88.356	9793.88	1801.05	18s
5	A5	100	88.6453	9560.74	1478.25	18s
5	A5	101	88.9347	8904.12	1236.93	18s
5	A5	102	89.224	9119.45	1033.12	18s
5	A5	103	89.5133	8607.04	842.121	18s
5	A5	104	89.8027	7878.23	652.609	18s
5	A5	105	90.092	8500.17	464.637	18s
5	A5	106	90.3813	8176.21	289.084	18s
5	A5	107	90.6707	8490.16	145.59	18s
5	A5	108	90.96	8365.88	55.9199	18s
5	A5	109	91.2493	8521.1	32.832	18s
5	A5	110	91.5387	7729.76	69.6816	18s
5	A5	111	91.828	6590.95	138.648	18s
5	A5	112	92.1173	6901.36	201.568	18s
5	A5	113	92.4067	7374.67	228.373	18s
5	A5	114	92.696	7386.82	211.342	18s
5	A5	115	92.9853	6560.1	165.355	18s
5	A5	116	93.2747	6346.7	114.941	18s
5	A5	117	93.564	7131.48	78.7285	18s
5	A5	118	93.8533	5880.32	62.1523	18s
5	A5	119	94.1427	6650.86	60.5762	18s
5	A5	120	94.432	6472.34	66.8184	18s
5	A5	121	94.7213	6190.64	76.0449	18s
6	A6	1	60.0013	1153724	29940.9	18s
6	A6	2	60.2906	1.14558e+06	30180.8	18s
6	A6	3	60.58	1.13842e+06	30374.9	18s
6	A6	4	60.8693	1.12978e+06	30441.3	18s
6	A6	5	61.1586	1.12079e+06	30352.6	18s
6	A6	6	61.448	1.111e+06	30142.6	18s
6	A6	7	61.7373	1.10367e+06	29882.8	18s
6	A6	8	62.0266	1.09419e+06	29646	18s
6	A6	9	62.316	1.08548e+06	29479.2	18s
6	A6	10	62.6053	1.07745e+06	29397.1	18s
6	A6	11	62.8946	1.06712e+06	29387.6	18s
6	A6	12	63.184	1.0598e+06	29422.9	18s
6	A6	13	63.4733	1.04974e+06	29469.5	18s
6	A6	14	63.7626	1.04123e+06	29497.1	18s
6	A6	15	64.052	1.03242e+06	29486.6	18s
6	A6	16	64.3413	1.02227e+06	29434.4	18s
6	A6	17	64.6306	1.01381e+06	29350.3	18s
6	A6	18	64.92	1.00543e+06	29249.7	18s
6	A6	19	65.2093	997526	29145.8	18s
6	A6	20	65.4986	987423	29046.4	18s
6	A6	21	65.788	978672	28953.2	18s
6	A6	22	66.0773	971035	28863.7	18s
6	A6	23	66.3666	962097	28769.8	18s
6	A6	24	66.656	952947	28658.8	18s
6	A6	25	66.9453	944073	28517.4	18s
6	A6	26	67.2346	936223	28341.5	18s
6	A6	27	67.524	926278	28142.5	18s
6	A6	28	67.8133	918440	27947.4	18s
6	A6	29	68.1026	909865	27787.4	18s
6	A6	30	68.392	903164	27683.5	18s
6	A6	31	68.6813	894318	27640.5	18s
6	A6	32	68.9706	885020	27641.2	18s
6	A6	33	69.26	876932	27668.2	18s
6	A6	34	69.5493	869808	27707.4	18s
6	A6	35	69.8386	859979	27745.1	18s
6	A6	36	70.128	853300	27764.8	18s
6	A6	37	70.4173	843755	27749.2	18s
6	A6	38	70.7066	834937	27686.2	18s
6	A6	39	70.996	826335	27583.3	18s
6	A6	40	71.2853	818930	27456.7	18s
6	A6	41	71.5746	810520	27330.1	18s
6	A6	42	71.864	803262	27218.3	18s
6	A6	43	72.1533	793427	27119.8	18s
6	A6	44	72.4426	787113	27019.1	18s
6	A6	45	72.732	778046	26901.2	18s
6	A6	46	73.0213	769577	26763.7	18s
6	A6	47	73.3106	761967	26620.4	18s
6	A6	48	73.6	755657	26492.4	18s
6	A6	49	73.8893	747202	26395.4	18s
6	A6	50	74.1786	738325	26329.7	18s
6	A6	51	74.468	732222	26283.1	18s
6	A6	52	74.7573	723151	26243.6	18s
6	A6	53	75.0466	714748	26211	18s
6	A6	54	75.336	707586	26198.9	18s
6	A6	55	75.6253	700816	26222.8	18s
6	A6	56	75.9146	692854	26284.7	18s
6	A6	57	76.204	683749	26365.9	18s
6	A6	58	76.4933	675852	26437.8	18s
6	A6	59	76.7826	668114	26484.7	18s
6	A6	60	77.072	658218	26523.9	18s
6	A6	61	77.3613	652325	26612.5	18s
6	A6	62	77.6507	643140	26835.6	18s
6	A6	63	77.94	634739	27284.4	18s
6	A6	64	78.2293	627178	28048.6	18s
6	A6	65	78.5186	618532	29187.2	18s
6	A6	66	78.808	609549	30688.6	18s
6	A6	67	79.0973	598308	32532.4	18s
6	A6	68	79.3867	587816	34693	18s
6	A6	69	79.676	576355	37162.2	18s
6	A6	70	79.9653	566212	39963.3	18s
6	A6	71	80.2547	551929	43154.7	18s
6	A6	72	80.544	538748	46829.2	18s
6	A6	73	80.8333	522391	51127.1	18s
6	A6	74	81.1227	506109	56265.1	18s
6	A6	75	81.412	487642	62564.6	18s
6	A6	76	81.7013	468085	70440.4	18s
6	A6	77	81.9907	445994	80306.5	18s
6	A6	78	82.28	421417	92381.6	18s
6	A6	79	82.5693	388351	106422	18s
6	A6	80	82.8587	348369	121480	18s
6	A6	81	83.148	297026	135819	18s
6	A6	82	83.4373	234310	147123	18s
6	A6	83	83.7267	169979	153008	18s
6	A6	84	84.016	116274	151710	18s
6	A6	85	84.3053	78050.1	142683	18s
6	A6	86	84.5947	52072.9	126856	18s
6	A6	87	84.884	38937.2	106396	18s
6	A6	88	85.1733	32832.1	84098.3	18s
6	A6	89	85.4627	28748.5	62644.2	18s
6	A6	90	85.752	26463.3	44014.3	18s
6	A6	91	86.0413	25287.2	29230.3	18s
6	A6	92	86.3307	24927.2	18815.4	18s
6	A6	93	86.62	24195.2	11802.6	18s
6	A6	94	86.9093	22923.4	7369.28	18s
6	A6	95	87.1987	22183.9	4722.27	18s
6	A6	96	87.488	21292.5	3186.22	18s
6	A6	97	87.7773	20401.5	2269.01	18s
6	A6	98	88.0667	21338.2	1665.58	18s
6	A6	99	88.356	20747.4	1224.39	18s
6	A6	100	88.6453	20921.3	894.561	18s
6	A6	101	88.9347	20635.5	669.424	18s
6	A6	102	89.224	19919.7	541.701	18s
6	A6	103	89.5133	19746.9	481.66	18s
6	A6	104	89.8027	18578.5	440.875	18s
6	A6	105	90.092	18681.6	373.705	18s
6	A6	106	90.3813	19558.5	260.949	18s
6	A6	107	90.6707	19353.4	120.414	18s
6	A6	108	90.96	19342.3	-3.03906	18s
6	A6	109	91.2493	19522	-62.8945	18s
6	A6	110	91.5387	19166.4	-37.3984	18s
6	A6	111	91.828	17712.8	58.2051	18s
6	A6	112	92.1173	17435.4	179.955	18s
6	A6	113	92.4067	18725.1	277.566	18s
6	A6	114	92.696	16977.1	316.748	18s
6	A6	115	92.9853	17492.3	289.283	18s
6	A6	116	93.2747	17419.8	208.76	18s
6	A6	117	93.564	16773.7	99.2598	18s
6	A6	118	93.8533	17644.4	-14.1367	18s
6	A6	119	94.1427	17213.9	-110.033	18s
6	A6	120	94.432	17356.4	-173.184	18s
6	A6	121	94.7213	18080.6	-197.375	18s
7	A7	1	60.0014	1.16898e+06	31676.6	asb3
7	A7	2	60.291	1.16081e+06	31922.3	asb3
7	A7	3	60.5806	1153401	32135.4	asb3
7	A7	4	60.8702	1.1434e+06	32246.6	asb3
7	A7	5	61.1598	1.13562e+06	32230.9	asb3
7	A7	6	61.4494	1.12566e+06	32113.2	asb3
7	A7	7	61.739	1.11597e+06	31947.9	asb3
7	A7	8	62.0286	1.1063e+06	31790.6	asb3
7	A7	9	62.3182	1.09792e+06	31674.3	asb3
7	A7	10	62.6078	1.0884e+06	31605.7	asb3
7	A7	11	62.8975	1.07841e+06	31572.9	asb3
7	A7	12	63.1871	1.06869e+06	31561	asb3
7	A7	13	63.4767	1.05912e+06	31560.5	asb3
7	A7	14	63.7663	1.04924e+06	31566.4	asb3
7	A7	15	64.0559	1.04074e+06	31570.9	asb3
7	A7	16	64.3455	1.03101e+06	31559.2	asb3
7	A7	17	64.6351	1.02085e+06	31513.4	asb3
7	A7	18	64.9247	1.01146e+06	31422.4	asb3
7	A7	19	65.2143	1.00192e+06	31291	asb3
7	A7	20	65.5039	993263	31142.7	asb3
7	A7	21	65.7935	982843	31012.3	asb3
7	A7	22	66.0831	974937	30935.5	asb3
7	A7	23	66.3727	965346	30934.2	asb3
7	A7	24	66.6623	955514	31004.9	asb3
7	A7	25	66.9519	947409	31115.7	asb3
7	A7	26	67.2415	938389	31215.8	asb3
7	A7	27	67.5312	927390	31259	asb3
7	A7	28	67.8208	916457	31229.4	asb3
7	A7	29	68.1104	908529	31150.6	asb3
7	A7	30	68.4	900442	31069.3	asb3
7	A7	31	68.6896	890135	31023.8	asb3
7	A7	32	68.9792	882691	31017.5	asb3
7	A7	33	69.2688	871469	31015.4	asb3
7	A7	34	69.5584	862485	30965.4	asb3
7	A7	35	69.848	853147	30829.6	asb3
7	A7	36	70.1376	843325	30606.9	asb3
7	A7	37	70.4272	834641	30335.1	asb3
7	A7	38	70.7168	825435	30073.6	asb3
7	A7	39	71.0064	817823	29877.2	asb3
7	A7	40	71.296	809508	29773	asb3
7	A7	41	71.5856	798546	29753.5	asb3
7	A7	42	71.8752	791205	29785	asb3
7	A7	43	72.1648	781395	29824.4	asb3
7	A7	44	72.4545	772825	29835.8	asb3
7	A7	45	72.7441	764520	29799.7	asb3
7	A7	46	73.0337	754622	29715.9	asb3
7	A7	47	73.3233	745239	29601	asb3
7	A7	48	73.6129	738990	29479.6	asb3
7	A7	49	73.9025	729986	29372.8	asb3
7	A7	50	74.1921	719942	29289.6	asb3
7	A7	51	74.4817	712438	29226.9	asb3
7	A7	52	74.7713	702697	29180	asb3
7	A7	53	75.0609	694768	29152.4	asb3
7	A7	54	75.3505	686044	29154.8	asb3
7	A7	55	75.6401	678137	29192.4	asb3
7	A7	56	75.9297	669248	29249.4	asb3
7	A7	57	76.2193	660289	29286.5	asb3
7	A7	58	76.5089	649952	29259	asb3
7	A7	59	76.7985	641890	29145.1	asb3
7	A7	60	77.0881	631569	28971.3	asb3
7	A7	61	77.3777	625564	28816.3	asb3
7	A7	62	77.6674	615560	28796.9	asb3
7	A7	63	77.957	606999	29048	asb3
7	A7	64	78.2466	597943	29716.8	asb3
7	A7	65	78.5362	589411	30974.7	asb3
7	A7	66	78.8258	580980	33034.9	asb3
7	A7	67	79.1154	570316	36167.4	asb3
7	A7	68	79.405	558401	40698.4	asb3
7	A7	69	79.6946	545236	46996.4	asb3
7	A7	70	79.9842	529136	55448.8	asb3
7	A7	71	80.2738	508264	66426	asb3
7	A7	72	80.5634	481436	80206.7	asb3
7	A7	73	80.853	450653	96831.8	asb3
7	A7	74	81.1426	413197	115868	asb3
7	A7	75	81.4322	364786	136121	asb3
7	A7	76	81.7218	301972	155446	asb3
7	A7	77	82.0114	220721	170857	asb3
7	A7	78	82.301	133824	179097	asb3
7	A7	79	82.5907	62598.6	177591	asb3
7	A7	80	82.8803	26398.2	165455	asb3
7	A7	81	83.1699	18264.3	144038	asb3
7	A7	82	83.4595	15432.5	116668	asb3
7	A7	83	83.7491	15134.7	87649	asb3
7	A7	84	84.0387	15278.4	60961.2	asb3
7	A7	85	84.3283	14686.7	39248.9	asb3
7	A7	86	84.6179	13258.1	23472.5	asb3
7	A7	87	84.9075	13212	13178.5	asb3
7	A7	88	85.1971	12948.3	7127.39	asb3
7	A7	89	85.4867	12330.2	3921.9	asb3
7	A7	90	85.7763	11746.6	2383.98	asb3
7	A7	91	86.0659	10085.6	1691.12	asb3
7	A7	92	86.3555	9050.75	1349.43	asb3
7	A7	93	86.6451	9921.55	1106.93	asb3
7	A7	94	86.9347	10447.5	868.301	asb3
7	A7	95	87.2243	9170.32	627.088	asb3
7	A7	96	87.514	9937.44	412.652	asb3
7	A7	97	87.8036	8523.1	251.951	asb3
7	A7	98	88.0932	8459.75	151.945	asb3
7	A7	99	88.3828	9348.28	103.131	asb3
7	A7	100	88.6724	9006.51	93.3848	asb3
7	A7	101	88.962	8187.93	116.713	asb3
7	A7	102	89.2516	7685.2	169.652	asb3
7	A7	103	89.5412	8087.87	241.188	asb3
7	A7	104	89.8308	6649.74	308.002	asb3
7	A7	105	90.1204	6616.87	341.393	asb3
7	A7	106	90.41	6819.8	321.6	asb3
7	A7	107	90.6996	7257.11	249.229	asb3
7	A7	108	90.9892	6890.86	145.486	asb3
7	A7	109	91.2788	6056.75	40.9199	asb3
7	A7	110	91.5684	6317.14	-39.7148	asb3
7	A7	111	91.858	6216.92	-86.8164	asb3
7	A7	112	92.1476	6426.24	-105.156	asb3
7	A7	113	92.4373	5785.52	-106.789	asb3
7	A7	114	92.7269	5516.14	-104.736	asb3
7	A7	115	93.0165	4897.13	-110.547	asb3
7	A7	116	93.3061	6106.03	-133.178	asb3
7	A7	117	93.5957	5992.78	-176.262	asb3
7	A7	118	93.8853	4458.99	-235.322	asb3
7	A7	119	94.1749	5293.77	-298.91	asb3
7	A7	120	94.4645	5863.54	-354.541	asb3
7	A7	121	94.7541	5549.72	-395.307	asb3
8	A8	1	60.0014	1.15428e+06	32374.4	asb3
8	A8	2	60.291	1.14497e+06	32494.7	asb3
8	A8	3	60.5806	1136735	32590.1	asb3
8	A8	4	60.8702	1.12779e+06	32619	asb3
8	A8	5	61.1598	1.11904e+06	32575.9	asb3
8	A8	6	61.4494	1.10829e+06	32483.3	asb3
8	A8	7	61.739	1.0999e+06	32369.9	asb3
8	A8	8	62.0286	1.09054e+06	32251.8	asb3
8	A8	9	62.3182	1.07948e+06	32132	asb3
8	A8	10	62.6078	1.06912e+06	32007.6	asb3
8	A8	11	62.8975	1.06e+06	31879.1	asb3
8	A8	12	63.1871	1.05009e+06	31750.5	asb3
8	A8	13	63.4767	1.04035e+06	31626.6	asb3
8	A8	14	63.7663	1.03035e+06	31509.6	asb3
8	A8	15	64.0559	1.02012e+06	31400.7	asb3
8	A8	16	64.3455	1011384	31298.5	asb3
8	A8	17	64.6351	1.00168e+06	31197.6	asb3
8	A8	18	64.9247	991133	31086.7	asb3
8	A8	19	65.2143	983855	30949.4	asb3
8	A8	20	65.5039	972575	30773.3	asb3
8	A8	21	65.7935	963011	30559.7	asb3
8	A8	22	66.0831	954501	30330.9	asb3
8	A8	23	66.3727	944173	30124.8	asb3
8	A8	24	66.6623	936316	29977.8	asb3
8	A8	25	66.9519	927367	29907.5	asb3
8	A8	26	67.2415	918141	29901	asb3
8	A8	27	67.5312	908924	29918.6	asb3
8	A8	28	67.8208	899208	29911.1	asb3
8	A8	29	68.1104	890441	29841.9	asb3
8	A8	30	68.4	880190	29701.7	asb3
8	A8	31	68.6896	872078	29512.8	asb3
8	A8	32	68.9792	863111	29318.6	asb3
8	A8	33	69.2688	854292	29164.2	asb3
8	A8	34	69.5584	845726	29075.3	asb3
8	A8	35	69.848	838338	29046.3	asb3
8	A8	36	70.1376	828303	29041.5	asb3
8	A8	37	70.4272	818829	29014.8	asb3
8	A8	38	70.7168	809469	28931.8	asb3
8	A8	39	71.0064	801276	28786.7	asb3
8	A8	40	71.296	792983	28601.1	asb3
8	A8	41	71.5856	784006	28408.2	asb3
8	A8	42	71.8752	776275	28233.9	asb3
8	A8	43	72.1648	767031	28080	asb3
8	A8	44	72.4545	758976	27943.8	asb3
8	A8	45	72.7441	750724	27812.5	asb3
8	A8	46	73.0337	742308	27674.7	asb3
8	A8	47	73.3233	733630	27527.6	asb3
8	A8	48	73.6129	726210	27376.7	asb3
8	A8	49	73.9025	718340	27229.5	asb3
8	A8	50	74.1921	710071	27090.9	asb3
8	A8	51	74.4817	700849	26961.3	asb3
8	A8	52	74.7713	694380	26839.3	asb3
8	A8	53	75.0609	684919	26722	asb3
8	A8	54	75.3505	678875	26605.7	asb3
8	A8	55	75.6401	669663	26485.3	asb3
8	A8	56	75.9297	661120	26360	asb3
8	A8	57	76.2193	652902	26238.1	asb3
8	A8	58	76.5089	646943	26137.4	asb3
8	A8	59	76.7985	639005	26075.3	asb3
8	A8	60	77.0881	629625	26056.2	asb3
8	A8	61	77.3777	621903	26073.7	asb3
8	A8	62	77.6674	611204	26132.3	asb3
8	A8	63	77.957	605010	26279.7	asb3
8	A8	64	78.2466	597654	26629.4	asb3
8	A8	65	78.5362	590714	27358.6	asb3
8	A8	66	78.8258	581305	28659.4	asb3
8	A8	67	79.1154	572839	30707.5	asb3
8	A8	68	79.405	562268	33801	asb3
8	A8	69	79.6946	552477	38215.4	asb3
8	A8	70	79.9842	538582	44259.5	asb3
8	A8	71	80.2738	520682	52262.8	asb3
8	A8	72	80.5634	500180	62515.5	asb3
8	A8	73	80.853	475269	75135	asb3
8	A8	74	81.1426	444683	89840.9	asb3
8	A8	75	81.4322	406245	105687	asb3
8	A8	76	81.7218	350937	120889	asb3
8	A8	77	82.0114	278466	132934	asb3
8	A8	78	82.301	200415	139121	asb3
8	A8	79	82.5907	143995	137410	asb3
8	A8	80	82.8803	123445	127267	asb3
8	A8	81	83.1699	117673	110035	asb3
8	A8	82	83.4595	114868	88595.3	asb3
8	A8	83	83.7491	114903	66442	asb3
8	A8	84	84.0387	113893	46605.9	asb3
8	A8	85	84.3283	113252	30919.9	asb3
8	A8	86	84.6179	110783	19337.3	asb3
8	A8	87	84.9075	110478	11903.1	asb3
8	A8	88	85.1971	109066	7663.94	asb3
8	A8	89	85.4867	107225	5464.42	asb3
8	A8	90	85.7763	106355	4401.41	asb3
8	A8	91	86.0659	105009	3898.23	asb3
8	A8	92	86.3555	105054	3648.43	asb3
8	A8	93	86.6451	102982	3513.58	asb3
8	A8	94	86.9347	101501	3432.26	asb3
8	A8	95	87.2243	100442	3366.17	asb3
8	A8	96	87.514	99484.3	3284.82	asb3
8	A8	97	87.8036	99718.4	3173.03	asb3
8	A8	98	88.0932	98847.5	3039.4	asb3
8	A8	99	88.3828	97450.6	2911.6	asb3
8	A8	100	88.6724	96032.4	2819.34	asb3
8	A8	101	88.962	96805.4	2777.43	asb3
8	A8	102	89.2516	94890.9	2779.47	asb3
8	A8	103	89.5412	93347.6	2803.42	asb3
8	A8	104	89.8308	92608.7	2823.22	asb3
8	A8	105	90.1204	92946.5	2819.42	asb3
8	A8	106	90.41	91540.3	2784.99	asb3
8	A8	107	90.6996	90699	2724.14	asb3
8	A8	108	90.9892	89388.7	2645.61	asb3
8	A8	109	91.2788	89628.2	2555.01	asb3
8	A8	110	91.5684	88021.2	2452.6	asb3
8	A8	111	91.858	88381	2338.26	asb3
8	A8	112	92.1476	87336.9	2218.54	asb3
8	A8	113	92.4373	87060.1	2108.78	asb3
8	A8	114	92.7269	86152.7	2027.51	asb3
8	A8	115	93.0165	85683.4	1986.94	asb3
8	A8	116	93.3061	84847.8	1986.15	asb3
8	A8	117	93.5957	83801.2	2010.9	asb3
8	A8	118	93.8853	83809.1	2039.79	asb3
8	A8	119	94.1749	83906.9	2053.27	asb3
8	A8	120	94.4645	82713.8	2040.94	asb3
8	A8	121	94.7541	83735.8	2003.82	asb3
9	A9	1	60.0011	1.18896e+06	32001.4	asb3
9	A9	2	60.2907	1.18082e+06	32226.5	asb3
9	A9	3	60.5802	1.17353e+06	32451.9	asb3
9	A9	4	60.8698	1.16484e+06	32599.9	asb3
9	A9	5	61.1593	1.15542e+06	32630.6	asb3
9	A9	6	61.4489	1.14363e+06	32555.2	asb3
9	A9	7	61.7385	1.1362e+06	32421.5	asb3
9	A9	8	62.028	1.12574e+06	32284	asb3
9	A9	9	62.3176	1116664	32178.8	asb3
9	A9	10	62.6071	1.10618e+06	32113.8	asb3
9	A9	11	62.8967	1096797	32074	asb3
9	A9	12	63.1863	1.08721e+06	32035	asb3
9	A9	13	63.4758	1.07695e+06	31974.8	asb3
9	A9	14	63.7654	1.06616e+06	31881.9	asb3
9	A9	15	64.055	1.05764e+06	31755.6	asb3
9	A9	16	64.3445	1.04756e+06	31603.4	asb3
9	A9	17	64.6341	1.03809e+06	31437.1	asb3
9	A9	18	64.9236	1.02837e+06	31270.3	asb3
9	A9	19	65.2132	1.01855e+06	31115.8	asb3
9	A9	20	65.5028	1.01023e+06	30983.4	asb3
9	A9	21	65.7923	1.00125e+06	30878.4	asb3
9	A9	22	66.0819	991161	30803.1	asb3
9	A9	23	66.3714	981187	30760.3	asb3
9	A9	24	66.661	972762	30751.8	asb3
9	A9	25	66.9506	963433	30774.6	asb3
9	A9	26	67.2401	954235	30815.2	asb3
9	A9	27	67.5297	944409	30852.2	asb3
9	A9	28	67.8192	934477	30866.1	asb3
9	A9	29	68.1088	925475	30849.5	asb3
9	A9	30	68.3984	915629	30809.3	asb3
9	A9	31	68.6879	907683	30756.8	asb3
9	A9	32	68.9775	897704	30697.1	asb3
9	A9	33	69.2671	888796	30624.4	asb3
9	A9	34	69.5566	878913	30530	asb3
9	A9	35	69.8462	869621	30415.9	asb3
9	A9	36	70.1357	860405	30302.1	asb3
9	A9	37	70.4253	851178	30218.5	asb3
9	A9	38	70.7149	843929	30187.7	asb3
9	A9	39	71.0044	833836	30207.2	asb3
9	A9	40	71.294	824136	30248.1	asb3
9	A9	41	71.5835	814591	30267.5	asb3
9	A9	42	71.8731	806322	30228.8	asb3
9	A9	43	72.1627	796359	30117.5	asb3
9	A9	44	72.4522	787477	29941.6	asb3
9	A9	45	72.7418	778862	29723.1	asb3
9	A9	46	73.0313	771046	29492.3	asb3
9	A9	47	73.3209	760335	29281.9	asb3
9	A9	48	73.6105	753210	29122	asb3
9	A9	49	73.9	744684	29037	asb3
9	A9	50	74.1896	736617	29038.8	asb3
9	A9	51	74.4791	727342	29123.1	asb3
9	A9	52	74.7687	718222	29268.7	asb3
9	A9	53	75.0583	709432	29442.4	asb3
9	A9	54	75.3478	701607	29605	asb3
9	A9	55	75.6374	691503	29718	asb3
9	A9	56	75.927	681860	29750.8	asb3
9	A9	57	76.2165	672524	29689.3	asb3
9	A9	58	76.5061	664484	29540.1	asb3
9	A9	59	76.7956	656584	29330.7	asb3
9	A9	60	77.0852	645695	29107	asb3
9	A9	61	77.3748	636079	28934.3	asb3
9	A9	62	77.6643	629139	28904.5	asb3
9	A9	63	77.9539	620293	29140.7	asb3
9	A9	64	78.2434	611476	29798.9	asb3
9	A9	65	78.533	603034	31088	asb3
9	A9	66	78.8226	592692	33239.2	asb3
9	A9	67	79.1121	582153	36517.6	asb3
9	A9	68	79.4017	571538	41254.6	asb3
9	A9	69	79.6913	558282	47830.6	asb3
9	A9	70	79.9808	541779	56648.2	asb3
9	A9	71	80.2704	519040	68085.1	asb3
9	A9	72	80.5599	491984	82418.3	asb3
9	A9	73	80.8495	460367	99681.9	asb3
9	A9	74	81.1391	421552	119427	asb3
9	A9	75	81.4286	375490	140415	asb3
9	A9	76	81.7182	310000	160397	asb3
9	A9	77	82.0077	223176	176221	asb3
9	A9	78	82.2973	131127	184450	asb3
9	A9	79	82.5869	56396.7	182409	asb3
9	A9	80	82.8764	19999.6	169261	asb3
9	A9	81	83.166	10763.4	146557	asb3
9	A9	82	83.4555	8166.66	117906	asb3
9	A9	83	83.7451	8636.5	87858.3	asb3
9	A9	84	84.0347	8169.09	60519	asb3
9	A9	85	84.3242	8175.35	38523.3	asb3
9	A9	86	84.6138	6791.92	22908.5	asb3
9	A9	87	84.9034	6761.42	12980.2	asb3
9	A9	88	85.1929	5918.96	7232.85	asb3
9	A9	89	85.4825	5822.11	4245.43	asb3
9	A9	90	85.772	5159.83	2852.54	asb3
9	A9	91	86.0616	3314.06	2264.08	asb3
9	A9	92	86.3512	3408.43	2021.77	asb3
9	A9	93	86.6407	3562.6	1897.06	asb3
9	A9	94	86.9303	1765.84	1795.67	asb3
9	A9	95	87.2198	2369.1	1690.91	asb3
9	A9	96	87.5094	1991.42	1583.62	asb3
9	A9	97	87.799	1357.23	1480.75	asb3
9	A9	98	88.0885	1016.69	1385.78	asb3
9	A9	99	88.3781	475.929	1297.11	asb3
9	A9	100	88.6676	514.226	1211.06	asb3
9	A9	101	88.9572	427.569	1126.13	asb3
9	A9	102	89.2468	35.8548	1044.85	asb3
9	A9	103	89.5363	-93.9111	971.781	asb3
9	A9	104	89.8259	-1308.59	910	asb3
9	A9	105	90.1154	48.4596	859.633	asb3
9	A9	106	90.405	-805.45	819.449	asb3
9	A9	107	90.6946	-913.85	788.76	asb3
9	A9	108	90.9841	-1445.56	766.488	asb3
9	A9	109	91.2737	-1773.37	748.18	asb3
9	A9	110	91.5632	-1362.43	724.826	asb3
9	A9	111	91.8528	-1901.92	685.891	asb3
9	A9	112	92.1424	-1721.21	624.684	asb3
9	A9	113	92.4319	-2519.32	542.082	asb3
9	A9	114	92.7215	-1489.97	446.463	asb3
9	A9	115	93.0111	-1612.97	350.227	asb3
9	A9	116	93.3006	-1476.34	264.35	asb3
9	A9	117	93.5902	-3037.58	192.893	asb3
9	A9	118	93.8797	-3030.63	130.531	asb3
9	A9	119	94.1693	-1681.75	65.9629	asb3
9	A9	120	94.4589	-1389.76	-10.0586	asb3
9	A9	121	94.7484	-1047.17	-98.043	asb3
10	A10	1	60.0011	1.19273e+06	30683.5	asb3
10	A10	2	60.2907	1.18538e+06	30914.8	asb3
10	A10	3	60.5802	1.17699e+06	31143.7	asb3
10	A10	4	60.8698	1.16807e+06	31303.4	asb3
10	A10	5	61.1593	1.15996e+06	31355.8	asb3
10	A10	6	61.4489	1.15012e+06	31301.5	asb3
10	A10	7	61.7385	1140245	31173.8	asb3
10	A10	8	62.028	1.13109e+06	31020.9	asb3
10	A10	9	62.3176	1.12057e+06	30886.8	asb3
10	A10	10	62.6071	1.11285e+06	30797.7	asb3
10	A10	11	62.8967	1.10276e+06	30756.8	asb3
10	A10	12	63.1863	1.09398e+06	30749.9	asb3
10	A10	13	63.4758	1.08278e+06	30757.1	asb3
10	A10	14	63.7654	1.07354e+06	30762.3	asb3
10	A10	15	64.055	1.06521e+06	30756	asb3
10	A10	16	64.3445	1.05495e+06	30732.1	asb3
10	A10	17	64.6341	1.04518e+06	30683	asb3
10	A10	18	64.9236	1.03624e+06	30602.5	asb3
10	A10	19	65.2132	1.02734e+06	30489.6	asb3
10	A10	20	65.5028	1.01672e+06	30354.3	asb3
10	A10	21	65.7923	1.00773e+06	30217.9	asb3
10	A10	22	66.0819	999930	30107	asb3
10	A10	23	66.3714	989645	30043.2	asb3
10	A10	24	66.661	980625	30035	asb3
10	A10	25	66.9506	972281	30074.6	asb3
10	A10	26	67.2401	962118	30143.2	asb3
10	A10	27	67.5297	952674	30219.2	asb3
10	A10	28	67.8192	943703	30288.5	asb3
10	A10	29	68.1088	934382	30348.5	asb3
10	A10	30	68.3984	924838	30406.8	asb3
10	A10	31	68.6879	915457	30473.5	asb3
10	A10	32	68.9775	907365	30553	asb3
10	A10	33	69.2671	897557	30638.2	asb3
10	A10	34	69.5566	887145	30712.7	asb3
10	A10	35	69.8462	878499	30757	asb3
10	A10	36	70.1357	868995	30755.7	asb3
10	A10	37	70.4253	858683	30703.1	asb3
10	A10	38	70.7149	850344	30603.4	asb3
10	A10	39	71.0044	840310	30469.2	asb3
10	A10	40	71.294	830506	30316.6	asb3
10	A10	41	71.5835	822740	30160.4	asb3
10	A10	42	71.8731	813278	30006.6	asb3
10	A10	43	72.1627	804283	29840.9	asb3
10	A10	44	72.4522	794261	29667.5	asb3
10	A10	45	72.7418	786447	29481.6	asb3
10	A10	46	73.0313	777176	29290	asb3
10	A10	47	73.3209	768538	29110.1	asb3
10	A10	48	73.6105	759972	28961.8	asb3
10	A10	49	73.9	752631	28856.9	asb3
10	A10	50	74.1896	742182	28794.3	asb3
10	A10	51	74.4791	734600	28764.1	asb3
10	A10	52	74.7687	724543	28757.3	asb3
10	A10	53	75.0583	717173	28770.5	asb3
10	A10	54	75.3478	708890	28804.1	asb3
10	A10	55	75.6374	698671	28853.8	asb3
10	A10	56	75.927	691007	28905.8	asb3
10	A10	57	76.2165	681337	28939	asb3
10	A10	58	76.5061	672212	28936.4	asb3
10	A10	59	76.7956	664391	28897.4	asb3
10	A10	60	77.0852	653637	28849.6	asb3
10	A10	61	77.3748	645379	28855.7	asb3
10	A10	62	77.6643	636462	29019.7	asb3
10	A10	63	77.9539	627738	29486.9	asb3
10	A10	64	78.2434	619107	30411.5	asb3
10	A10	65	78.533	609881	31958.3	asb3
10	A10	66	78.8226	600130	34421.7	asb3
10	A10	67	79.1121	588260	38095.5	asb3
10	A10	68	79.4017	577076	43312.2	asb3
10	A10	69	79.6913	561022	50433.2	asb3
10	A10	70	79.9808	542071	59824.7	asb3
10	A10	71	80.2704	516968	71805.5	asb3
10	A10	72	80.5599	486307	86535.4	asb3
10	A10	73	80.8495	453576	103811	asb3
10	A10	74	81.1391	409441	122785	asb3
10	A10	75	81.4286	350335	141718	asb3
10	A10	76	81.7182	270540	157966	asb3
10	A10	77	82.0077	179247	168391	asb3
10	A10	78	82.2973	98100	170208	asb3
10	A10	79	82.5869	44370.3	161985	asb3
10	A10	80	82.8764	25695.9	144339	asb3
10	A10	81	83.166	21801.1	119924	asb3
10	A10	82	83.4555	21644.7	92655.3	asb3
10	A10	83	83.7451	21671.5	66507	asb3
10	A10	84	84.0347	21154.1	44428.6	asb3
10	A10	85	84.3242	21575.4	27618.6	asb3
10	A10	86	84.6138	20234.3	15420.6	asb3
10	A10	87	84.9034	20397.1	8003.67	asb3
10	A10	88	85.1929	19778.8	3939.36	asb3
10	A10	89	85.4825	19875.6	1939.37	asb3
10	A10	90	85.772	19166.6	1074.25	asb3
10	A10	91	86.0616	19421.6	778.447	asb3
10	A10	92	86.3512	18442.5	750.084	asb3
10	A10	93	86.6407	17309.8	836.891	asb3
10	A10	94	86.9303	17281.9	956.223	asb3
10	A10	95	87.2198	16144.7	1058.21	asb3
10	A10	96	87.5094	15789.2	1117.98	asb3
10	A10	97	87.799	16368.1	1136.4	asb3
10	A10	98	88.0885	15546.6	1133.8	asb3
10	A10	99	88.3781	14296.4	1134.57	asb3
10	A10	100	88.6676	13841.2	1150.61	asb3
10	A10	101	88.9572	13380.8	1174.79	asb3
10	A10	102	89.2468	12574	1188.2	asb3
10	A10	103	89.5363	12305	1174.56	asb3
10	A10	104	89.8259	12451	1130.88	asb3
10	A10	105	90.1154	11663.4	1067.59	asb3
10	A10	106	90.405	10691	1000.26	asb3
10	A10	107	90.6946	10271.8	941.113	asb3
10	A10	108	90.9841	11144.3	896.133	asb3
10	A10	109	91.2737	9624.76	867.523	asb3
10	A10	110	91.5632	10205	856.055	asb3
10	A10	111	91.8528	7748.71	859.9	asb3
10	A10	112	92.1424	8778.02	872.17	asb3
10	A10	113	92.4319	8655.3	881.67	asb3
10	A10	114	92.7215	7389.25	877.576	asb3
10	A10	115	93.0111	6984.76	853.863	asb3
10	A10	116	93.3006	6847.27	809.965	asb3
10	A10	117	93.5902	6495.76	748.852	asb3
10	A10	118	93.8797	6382.1	676.064	asb3
10	A10	119	94.1693	6588.46	600.314	asb3
10	A10	120	94.4589	6468.44	532.77	asb3
10	A10	121	94.7484	6580.28	483.143	asb3
11	A11	1	60.0011	1.10086e+06	27103.8	asb3
11	A11	2	60.2909	1.09428e+06	27251.4	asb3
11	A11	3	60.5808	1.08467e+06	27370.1	asb3
11	A11	4	60.8706	1.07783e+06	27438	asb3
11	A11	5	61.1605	1.07116e+06	27461.8	asb3
11	A11	6	61.4503	1.06137e+06	27467	asb3
11	A11	7	61.7402	1.05455e+06	27479	asb3
11	A11	8	62.03	1.04531e+06	27509.3	asb3
11	A11	9	62.3198	1.03723e+06	27552.6	asb3
11	A11	10	62.6097	1.0286e+06	27593.4	asb3
11	A11	11	62.8995	1.01885e+06	27613.3	asb3
11	A11	12	63.1894	1.01201e+06	27598.3	asb3
11	A11	13	63.4792	1.00233e+06	27543.4	asb3
11	A11	14	63.7691	992338	27457.8	asb3
11	A11	15	64.0589	986053	27364	asb3
11	A11	16	64.3487	975770	27289.6	asb3
11	A11	17	64.6386	968709	27253.7	asb3
11	A11	18	64.9284	961266	27255.3	asb3
11	A11	19	65.2183	951790	27273.2	asb3
11	A11	20	65.5081	943686	27276.4	asb3
11	A11	21	65.798	934297	27243.6	asb3
11	A11	22	66.0878	926829	27174.5	asb3
11	A11	23	66.3776	918605	27090.8	asb3
11	A11	24	66.6675	909032	27024	asb3
11	A11	25	66.9573	902091	26997.9	asb3
11	A11	26	67.2472	894954	27015.3	asb3
11	A11	27	67.537	884628	27057.9	asb3
11	A11	28	67.8269	876190	27097.1	asb3
11	A11	29	68.1167	868508	27109.2	asb3
11	A11	30	68.4065	859662	27086.2	asb3
11	A11	31	68.6964	851951	27035.4	asb3
11	A11	32	68.9862	843157	26973	asb3
11	A11	33	69.2761	835346	26915.8	asb3
11	A11	34	69.5659	826373	26875.2	asb3
11	A11	35	69.8558	819519	26855	asb3
11	A11	36	70.1456	811221	26851.7	asb3
11	A11	37	70.4355	801158	26856.4	asb3
11	A11	38	70.7253	794128	26859.1	asb3
11	A11	39	71.0151	786198	26850.4	asb3
11	A11	40	71.305	778110	26818.6	asb3
11	A11	41	71.5948	768381	26756	asb3
11	A11	42	71.8847	761322	26660.7	asb3
11	A11	43	72.1745	752461	26540.7	asb3
11	A11	44	72.4644	745519	26415.5	asb3
11	A11	45	72.7542	737596	26310.1	asb3
11	A11	46	73.044	729418	26243.6	asb3
11	A11	47	73.3339	721853	26221.4	asb3
11	A11	48	73.6237	713533	26234.9	asb3
11	A11	49	73.9136	705422	26266.5	asb3
11	A11	50	74.2034	698594	26296.1	asb3
11	A11	51	74.4933	688931	26307.5	asb3
11	A11	52	74.7831	681991	26293	asb3
11	A11	53	75.0729	673320	26256.2	asb3
11	A11	54	75.3628	665400	26212.9	asb3
11	A11	55	75.6526	658979	26186.1	asb3
11	A11	56	75.9425	649596	26196.8	asb3
11	A11	57	76.2323	641495	26253.2	asb3
11	A11	58	76.5222	634636	26345.7	asb3
11	A11	59	76.812	626146	26448.2	asb3
11	A11	60	77.1018	615908	26529.6	asb3
11	A11	61	77.3917	607428	26574.4	asb3
11	A11	62	77.6815	599904	26604.8	asb3
11	A11	63	77.9714	592286	26698.8	asb3
11	A11	64	78.2612	582978	26981.8	asb3
11	A11	65	78.5511	576022	27613.3	asb3
11	A11	66	78.8409	567454	28835.9	asb3
11	A11	67	79.1307	559208	30914.8	asb3
11	A11	68	79.4206	547946	34142.5	asb3
11	A11	69	79.7104	536352	38831.1	asb3
11	A11	70	80.0003	517694	45309.2	asb3
11	A11	71	80.2901	498999	53918.5	asb3
11	A11	72	80.58	474866	64983.5	asb3
11	A11	73	80.8698	444193	78707.2	asb3
11	A11	74	81.1597	409669	94951.8	asb3
11	A11	75	81.4495	359646	112934	asb3
11	A11	76	81.7393	289872	130970	asb3
11	A11	77	82.0292	202459	146477	asb3
11	A11	78	82.319	114545	156415	asb3
11	A11	79	82.6089	51800.7	158139	asb3
11	A11	80	82.8987	22243.1	150366	asb3
11	A11	81	83.1886	15166.3	133803	asb3
11	A11	82	83.4784	14034.8	111067	asb3
11	A11	83	83.7682	13205.8	85887.9	asb3
11	A11	84	84.0581	12819.8	61954.4	asb3
11	A11	85	84.3479	11747.8	41921.6	asb3
11	A11	86	84.6378	11389.5	26967.6	asb3
11	A11	87	84.9276	10305.7	15784.8	asb3
11	A11	88	85.2175	9418.88	9013.63	asb3
11	A11	89	85.5073	9696.54	5304.75	asb3
11	A11	90	85.7971	8159.81	3448.8	asb3
11	A11	91	86.087	6910.07	2576.77	asb3
11	A11	92	86.3768	6838.3	2160.03	asb3
11	A11	93	86.6667	6595.63	1925.61	asb3
11	A11	94	86.9565	6718.27	1760.3	asb3
11	A11	95	87.2464	5268.18	1634.53	asb3
11	A11	96	87.5362	4675.67	1550.24	asb3
11	A11	97	87.826	5105.75	1509.72	asb3
11	A11	98	88.1159	3795.81	1502.49	asb3
11	A11	99	88.4057	3168.3	1506.59	asb3
11	A11	100	88.6956	2950.13	1497.48	asb3
11	A11	101	88.9854	2054.38	1457.8	asb3
11	A11	102	89.2753	3663.96	1383.18	asb3
11	A11	103	89.5651	1342.55	1282.1	asb3
11	A11	104	89.8549	1245.71	1170.23	asb3
11	A11	105	90.1448	2257.85	1061.94	asb3
11	A11	106	90.4346	476.142	964.107	asb3
11	A11	107	90.7245	1101.91	876.061	asb3
11	A11	108	91.0143	976.035	794.713	asb3
11	A11	109	91.3042	898.547	719.855	asb3
11	A11	110	91.594	-43.5307	654.818	asb3
11	A11	111	91.8839	-27.9362	602.359	asb3
11	A11	112	92.1737	348.63	559.99	asb3
11	A11	113	92.4635	-500.494	519.418	asb3
11	A11	114	92.7534	-531.862	471.168	asb3
11	A11	115	93.0432	331.07	411.064	asb3
11	A11	116	93.3331	278.492	343.479	asb3
11	A11	117	93.6229	-1567.4	278.451	asb3
11	A11	118	93.9128	-701.436	224.482	asb3
11	A11	119	94.2026	-368.668	182.117	asb3
11	A11	120	94.4924	-1256.2	143.18	asb3
11	A11	121	94.7823	-194.652	96.2598	asb3
12	A12	1	60.0011	1.02307e+06	25497.2	asb3
12	A12	2	60.2909	1.01551e+06	25651.2	asb3
12	A12	3	60.5808	1.01105e+06	25803.1	asb3
12	A12	4	60.8706	1.00228e+06	25911.9	asb3
12	A12	5	61.1605	994651	25960.9	asb3
12	A12	6	61.4503	987629	25962.3	asb3
12	A12	7	61.7402	978312	25943.3	asb3
12	A12	8	62.03	972916	25928.2	asb3
12	A12	9	62.3198	962982	25926.8	asb3
12	A12	10	62.6097	956366	25932.6	asb3
12	A12	11	62.8995	946733	25928.4	asb3
12	A12	12	63.1894	939642	25894.6	asb3
12	A12	13	63.4792	932155	25818	asb3
12	A12	14	63.7691	922586	25701.8	asb3
12	A12	15	64.0589	915352	25571	asb3
12	A12	16	64.3487	906085	25465.2	asb3
12	A12	17	64.6386	900470	25417.7	asb3
12	A12	18	64.9284	893534	25432.2	asb3
12	A12	19	65.2183	885564	25476.3	asb3
12	A12	20	65.5081	876639	25499.4	asb3
12	A12	21	65.798	867225	25462.7	asb3
12	A12	22	66.0878	861093	25360.5	asb3
12	A12	23	66.3776	853826	25219.6	asb3
12	A12	24	66.6675	846396	25080.7	asb3
12	A12	25	66.9573	836681	24977.6	asb3
12	A12	26	67.2472	830467	24925.1	asb3
12	A12	27	67.537	824462	24916.7	asb3
12	A12	28	67.8269	814653	24931.5	asb3
12	A12	29	68.1167	807762	24946.1	asb3
12	A12	30	68.4065	799021	24946.9	asb3
12	A12	31	68.6964	792536	24935.2	asb3
12	A12	32	68.9862	784252	24921.5	asb3
12	A12	33	69.2761	778855	24910.1	asb3
12	A12	34	69.5659	768731	24891	asb3
12	A12	35	69.8558	761822	24843.6	asb3
12	A12	36	70.1456	754513	24753.4	asb3
12	A12	37	70.4355	745291	24628.9	asb3
12	A12	38	70.7253	739784	24499.9	asb3
12	A12	39	71.0151	732200	24410.7	asb3
12	A12	40	71.305	726011	24394.2	asb3
12	A12	41	71.5948	716525	24449.1	asb3
12	A12	42	71.8847	710075	24542.7	asb3
12	A12	43	72.1745	701826	24624	asb3
12	A12	44	72.4644	694921	24652.1	asb3
12	A12	45	72.7542	687748	24601.8	asb3
12	A12	46	73.044	677838	24466.8	asb3
12	A12	47	73.3339	673841	24270.1	asb3
12	A12	48	73.6237	664531	24059	asb3
12	A12	49	73.9136	658249	23887.4	asb3
12	A12	50	74.2034	652965	23798.3	asb3
12	A12	51	74.4933	643981	23806	asb3
12	A12	52	74.7831	637611	23889.7	asb3
12	A12	53	75.0729	629470	24002.9	asb3
12	A12	54	75.3628	621585	24092.8	asb3
12	A12	55	75.6526	615404	24120.9	asb3
12	A12	56	75.9425	607284	24073.7	asb3
12	A12	57	76.2323	599248	23960.5	asb3
12	A12	58	76.5222	593880	23804.4	asb3
12	A12	59	76.812	586880	23634.6	asb3
12	A12	60	77.1018	576502	23486	asb3
12	A12	61	77.3917	571139	23406.8	asb3
12	A12	62	77.6815	564311	23466.4	asb3
12	A12	63	77.9714	558465	23757.5	asb3
12	A12	64	78.2612	548325	24389.1	asb3
12	A12	65	78.5511	541922	25444	asb3
12	A12	66	78.8409	532930	27076.7	asb3
12	A12	67	79.1307	525579	29478.7	asb3
12	A12	68	79.4206	513933	32891.8	asb3
12	A12	69	79.7104	503048	37619.9	asb3
12	A12	70	80.0003	487748	44017.6	asb3
12	A12	71	80.2901	470276	52467.8	asb3
12	A12	72	80.58	445842	63332.1	asb3
12	A12	73	80.8698	419516	76844.8	asb3
12	A12	74	81.1597	386347	92910	asb3
12	A12	75	81.4495	343363	110816	asb3
12	A12	76	81.7393	281096	128977	asb3
12	A12	77	82.0292	201291	144895	asb3
12	A12	78	82.319	119404	155544	asb3
12	A12	79	82.6089	57126.3	158179	asb3
12	A12	80	82.8987	27866.8	151314	asb3
12	A12	81	83.1886	20069.8	135421	asb3
12	A12	82	83.4784	17756.7	112948	asb3
12	A12	83	83.7682	17486.9	87586.7	asb3
12	A12	84	84.0581	16749.5	63115.3	asb3
12	A12	85	84.3479	16559.3	42358.5	asb3
12	A12	86	84.6378	15111.8	26663.8	asb3
12	A12	87	84.9276	14131.8	15589.7	asb3
12	A12	88	85.2175	13427.3	8711.91	asb3
12	A12	89	85.5073	12612	4845.55	asb3
12	A12	90	85.7971	14528.5	2836.61	asb3
12	A12	91	86.087	11325.2	1860.17	asb3
12	A12	92	86.3768	12343.7	1420.14	asb3
12	A12	93	86.6667	10562.5	1251.98	asb3
12	A12	94	86.9565	10950.4	1215.88	asb3
12	A12	95	87.2464	8579.3	1225.48	asb3
12	A12	96	87.5362	8696.63	1219.23	asb3
12	A12	97	87.826	8668.94	1160.36	asb3
12	A12	98	88.1159	10154.6	1044.9	asb3
12	A12	99	88.4057	8244.31	900.268	asb3
12	A12	100	88.6956	7343.67	767.053	asb3
12	A12	101	88.9854	7100.65	671.9	asb3
12	A12	102	89.2753	7071.23	609.383	asb3
12	A12	103	89.5651	6039.87	546.855	asb3
12	A12	104	89.8549	6865.89	449.445	asb3
12	A12	105	90.1448	7746.35	306.811	asb3
12	A12	106	90.4346	6509.28	142.279	asb3
12	A12	107	90.7245	6120.21	-0.931641	asb3
12	A12	108	91.0143	6116.6	-85.4414	asb3
12	A12	109	91.3042	6336.93	-99.9551	asb3
12	A12	110	91.594	5675.02	-63.166	asb3
12	A12	111	91.8839	4540.81	-12.5566	asb3
12	A12	112	92.1737	4530.6	13.168	asb3
12	A12	113	92.4635	6512.45	-10.1582	asb3
12	A12	114	92.7534	5842.03	-82.8574	asb3
12	A12	115	93.0432	4776.55	-181.537	asb3
12	A12	116	93.3331	5131.75	-270.471	asb3
12	A12	117	93.6229	4159.38	-320.4	asb3
12	A12	118	93.9128	5250.02	-323.938	asb3
12	A12	119	94.2026	5628.35	-296.842	asb3
12	A12	120	94.4924	4212.96	-264.936	asb3
12	A12	121	94.7823	4766.3	-247.611	asb3
13	B1	1	60.0014	1.29861e+06	39770.1	18s
13	B1	2	60.291	1.28702e+06	39836.2	18s
13	B1	3	60.5806	1.27746e+06	39826	18s
13	B1	4	60.8702	1.26487e+06	39676.1	18s
13	B1	5	61.1598	1.25265e+06	39397	18s
13	B1	6	61.4494	1.24208e+06	39055.3	18s
13	B1	7	61.739	1.23213e+06	38724.5	18s
13	B1	8	62.0286	1.21994e+06	38446.2	18s
13	B1	9	62.3182	1206719	38220.4	18s
13	B1	10	62.6078	1196344	38023.4	18s
13	B1	11	62.8975	1.18315e+06	37829.6	18s
13	B1	12	63.1871	1171994	37619	18s
13	B1	13	63.4767	1.161e+06	37375.6	18s
13	B1	14	63.7663	1.14876e+06	37085.3	18s
13	B1	15	64.0559	1.13732e+06	36742.9	18s
13	B1	16	64.3455	1.12394e+06	36358.2	18s
13	B1	17	64.6351	1.11601e+06	35955.6	18s
13	B1	18	64.9247	1.10238e+06	35562.5	18s
13	B1	19	65.2143	1.09372e+06	35195.4	18s
13	B1	20	65.5039	1.08185e+06	34855	18s
13	B1	21	65.7935	1.07241e+06	34532	18s
13	B1	22	66.0831	1.05993e+06	34221.7	18s
13	B1	23	66.3727	1.05009e+06	33933	18s
13	B1	24	66.6623	1040389	33683.7	18s
13	B1	25	66.9519	1.02846e+06	33488.2	18s
13	B1	26	67.2415	1.02097e+06	33342.5	18s
13	B1	27	67.5311	1.00891e+06	33223.8	18s
13	B1	28	67.8207	997594	33102.8	18s
13	B1	29	68.1103	987622	32959.8	18s
13	B1	30	68.3999	979465	32793	18s
13	B1	31	68.6896	966927	32612.5	18s
13	B1	32	68.9792	958158	32427.5	18s
13	B1	33	69.2688	948932	32235.8	18s
13	B1	34	69.5584	937361	32023.2	18s
13	B1	35	69.848	928620	31772.1	18s
13	B1	36	70.1376	918082	31485.1	18s
13	B1	37	70.4272	907800	31172.8	18s
13	B1	38	70.7168	899160	30847	18s
13	B1	39	71.0064	889892	30538	18s
13	B1	40	71.296	880163	30273.5	18s
13	B1	41	71.5856	871080	30069.8	18s
13	B1	42	71.8752	861630	29931.2	18s
13	B1	43	72.1648	853438	29848.2	18s
13	B1	44	72.4544	843349	29799.7	18s
13	B1	45	72.744	834975	29754.8	18s
13	B1	46	73.0336	825373	29680.1	18s
13	B1	47	73.3232	815411	29549.9	18s
13	B1	48	73.6128	807205	29357	18s
13	B1	49	73.9024	797738	29116.6	18s
13	B1	50	74.192	789523	28859.3	18s
13	B1	51	74.4817	781159	28616.6	18s
13	B1	52	74.7713	772425	28409.2	18s
13	B1	53	75.0609	763616	28244.2	18s
13	B1	54	75.3505	754151	28122.4	18s
13	B1	55	75.6401	745703	28047.5	18s
13	B1	56	75.9297	738748	28029	18s
13	B1	57	76.2193	728795	28073.8	18s
13	B1	58	76.5089	721424	28177.9	18s
13	B1	59	76.7985	709748	28325	18s
13	B1	60	77.0881	702739	28497.8	18s
13	B1	61	77.3777	691904	28696.2	18s
13	B1	62	77.6673	682683	28951	18s
13	B1	63	77.9569	674710	29322.5	18s
13	B1	64	78.2465	664662	29887.5	18s
13	B1	65	78.5361	655853	30717.6	18s
13	B1	66	78.8257	645201	31881.4	18s
13	B1	67	79.1153	635271	33481.4	18s
13	B1	68	79.4049	623183	35441	18s
13	B1	69	79.6945	611204	37747.7	18s
13	B1	70	79.9841	599129	40398.7	18s
13	B1	71	80.2738	584538	43421.5	18s
13	B1	72	80.5634	569675	46892.1	18s
13	B1	73	80.853	554777	50953	18s
13	B1	74	81.1426	537709	55831.7	18s
13	B1	75	81.4322	516917	61852.5	18s
13	B1	76	81.7218	497262	69429.1	18s
13	B1	77	82.0114	473521	79006	18s
13	B1	78	82.301	445736	90918.6	18s
13	B1	79	82.5906	413846	105162	18s
13	B1	80	82.8802	372393	121117	18s
13	B1	81	83.1698	316662	137361	18s
13	B1	82	83.4594	249794	151706	18s
13	B1	83	83.749	181418	161566	18s
13	B1	84	84.0386	120410	164618	18s
13	B1	85	84.3282	76050.1	159514	18s
13	B1	86	84.6178	44027.4	146379	18s
13	B1	87	84.9074	28004.9	126846	18s
13	B1	88	85.197	20436.1	103615	18s
13	B1	89	85.4866	16925.5	79712	18s
13	B1	90	85.7762	13279.5	57739.8	18s
13	B1	91	86.0659	11433.7	39389.5	18s
13	B1	92	86.3555	10388.9	25784.2	18s
13	B1	93	86.6451	10664.4	16522.1	18s
13	B1	94	86.9347	8855.72	10356.2	18s
13	B1	95	87.2243	8036.51	6459.85	18s
13	B1	96	87.5139	8192.66	4072.26	18s
13	B1	97	87.8035	8020.73	2610.38	18s
13	B1	98	88.0931	8668.1	1690.01	18s
13	B1	99	88.3827	7740.1	1090.87	18s
13	B1	100	88.6723	8038.74	699.604	18s
13	B1	101	88.9619	7173.5	456.586	18s
13	B1	102	89.2515	8190.51	321.768	18s
13	B1	103	89.5411	6940.99	261.992	18s
13	B1	104	89.8307	7389	251.541	18s
13	B1	105	90.1203	7310.64	274.678	18s
13	B1	106	90.4099	6898.73	323.689	18s
13	B1	107	90.6995	6343.32	392.893	18s
13	B1	108	90.9891	5908.54	473.139	18s
13	B1	109	91.2787	6085.91	550.422	18s
13	B1	110	91.5683	5521.86	608.799	18s
13	B1	111	91.858	5161.6	634.738	18s
13	B1	112	92.1476	4664.43	619.949	18s
13	B1	113	92.4372	5245.08	562.137	18s
13	B1	114	92.7268	4413.34	465.092	18s
13	B1	115	93.0164	4641.44	339.287	18s
13	B1	116	93.306	5657.05	201.736	18s
13	B1	117	93.5956	4673.65	72.8926	18s
13	B1	118	93.8852	4879.36	-30.0723	18s
13	B1	119	94.1748	5020.22	-100.6	18s
13	B1	120	94.4644	4367.41	-145.816	18s
13	B1	121	94.754	4304.51	-182.395	18s
14	B2	1	60.0014	1.47841e+06	42624.5	18s
14	B2	2	60.291	1.46715e+06	42858.2	18s
14	B2	3	60.5806	1.45617e+06	43067.1	18s
14	B2	4	60.8702	1.44396e+06	43142.2	18s
14	B2	5	61.1598	1.43273e+06	43025.7	18s
14	B2	6	61.4494	1.41844e+06	42729.6	18s
14	B2	7	61.739	1.40572e+06	42321.8	18s
14	B2	8	62.0286	1393661	41894.2	18s
14	B2	9	62.3182	1380552	41530.3	18s
14	B2	10	62.6078	1368844	41280.6	18s
14	B2	11	62.8975	1.35602e+06	41150.3	18s
14	B2	12	63.1871	1.345e+06	41103.6	18s
14	B2	13	63.4767	1.33096e+06	41080.3	18s
14	B2	14	63.7663	1.31849e+06	41021.4	18s
14	B2	15	64.0559	1.30633e+06	40892.6	18s
14	B2	16	64.3455	1.2921e+06	40695.3	18s
14	B2	17	64.6351	1.28073e+06	40460.7	18s
14	B2	18	64.9247	1.26941e+06	40229.9	18s
14	B2	19	65.2143	1.25748e+06	40032.8	18s
14	B2	20	65.5039	1.2441e+06	39877.2	18s
14	B2	21	65.7935	1234370	39750.9	18s
14	B2	22	66.0831	1.22147e+06	39634.8	18s
14	B2	23	66.3727	1.2085e+06	39515.8	18s
14	B2	24	66.6623	1.19638e+06	39390.3	18s
14	B2	25	66.9519	1.18627e+06	39259.7	18s
14	B2	26	67.2415	1.1737e+06	39121.7	18s
14	B2	27	67.5311	1.16163e+06	38967.3	18s
14	B2	28	67.8207	1.14871e+06	38787.4	18s
14	B2	29	68.1103	1.13795e+06	38579.1	18s
14	B2	30	68.3999	1.12751e+06	38346.9	18s
14	B2	31	68.6896	1.11454e+06	38099.5	18s
14	B2	32	68.9792	1.10382e+06	37844.8	18s
14	B2	33	69.2688	1.09294e+06	37591.6	18s
14	B2	34	69.5584	1080199	37353.9	18s
14	B2	35	69.848	1.07034e+06	37149.2	18s
14	B2	36	70.1376	1.06001e+06	36987.5	18s
14	B2	37	70.4272	1.04785e+06	36873.2	18s
14	B2	38	70.7168	1.03766e+06	36791.8	18s
14	B2	39	71.0064	1.02545e+06	36718.4	18s
14	B2	40	71.296	1.01394e+06	36631.3	18s
14	B2	41	71.5856	1.00515e+06	36521.2	18s
14	B2	42	71.8752	992209	36393.1	18s
14	B2	43	72.1648	981764	36256.4	18s
14	B2	44	72.4544	971501	36114.3	18s
14	B2	45	72.744	962382	35953.9	18s
14	B2	46	73.0336	949573	35749.6	18s
14	B2	47	73.3232	938465	35477.2	18s
14	B2	48	73.6128	928596	35133.5	18s
14	B2	49	73.9024	918970	34746.4	18s
14	B2	50	74.192	908560	34366.6	18s
14	B2	51	74.4817	899003	34045.1	18s
14	B2	52	74.7713	889829	33811.1	18s
14	B2	53	75.0609	878835	33665	18s
14	B2	54	75.3505	868613	33590.2	18s
14	B2	55	75.6401	858556	33573.5	18s
14	B2	56	75.9297	848432	33619.1	18s
14	B2	57	76.2193	838875	33744	18s
14	B2	58	76.5089	830666	33958.8	18s
14	B2	59	76.7985	818214	34251.4	18s
14	B2	60	77.0881	805929	34590.5	18s
14	B2	61	77.3777	795482	34950.3	18s
14	B2	62	77.6673	784863	35342.1	18s
14	B2	63	77.9569	773664	35830.4	18s
14	B2	64	78.2465	762987	36522.2	18s
14	B2	65	78.5361	752440	37523.8	18s
14	B2	66	78.8257	740207	38912.9	18s
14	B2	67	79.1153	728430	40755.6	18s
14	B2	68	79.4049	714552	43052.1	18s
14	B2	69	79.6945	699143	45771.4	18s
14	B2	70	79.9841	683553	48883.8	18s
14	B2	71	80.2738	667314	52396.6	18s
14	B2	72	80.5634	650475	56385.3	18s
14	B2	73	80.853	630676	61013	18s
14	B2	74	81.1426	610147	66542.5	18s
14	B2	75	81.4322	585722	73338.1	18s
14	B2	76	81.7218	561384	81847.1	18s
14	B2	77	82.0114	533421	92519.6	18s
14	B2	78	82.301	500189	105636	18s
14	B2	79	82.5906	460055	121046	18s
14	B2	80	82.8802	408974	137887	18s
14	B2	81	83.1698	341351	154442	18s
14	B2	82	83.4594	265005	168270	18s
14	B2	83	83.749	187858	176681	18s
14	B2	84	84.0386	123104	177466	18s
14	B2	85	84.3282	76015.5	169602	18s
14	B2	86	84.6178	45752.3	153652	18s
14	B2	87	84.9074	30214.6	131670	18s
14	B2	88	85.197	22138.3	106628	18s
14	B2	89	85.4866	17067.1	81624.7	18s
14	B2	90	85.7762	15476.3	59166	18s
14	B2	91	86.0659	14136	40760.3	18s
14	B2	92	86.3555	14048	26556.3	18s
14	B2	93	86.6451	12803.7	16562.2	18s
14	B2	94	86.9347	12306.7	10082.8	18s
14	B2	95	87.2243	11783.9	6166.41	18s
14	B2	96	87.5139	10560.7	3943.56	18s
14	B2	97	87.8035	9378.56	2735.94	18s
14	B2	98	88.0931	10375	2078.64	18s
14	B2	99	88.3827	9932.28	1690.31	18s
14	B2	100	88.6723	8752.25	1420.41	18s
14	B2	101	88.9619	7440.5	1195.8	18s
14	B2	102	89.2515	8297.47	981.789	18s
14	B2	103	89.5411	9301.58	763.496	18s
14	B2	104	89.8307	7648.11	541.418	18s
14	B2	105	90.1203	8158.48	329.336	18s
14	B2	106	90.4099	7625.64	147.793	18s
14	B2	107	90.6995	8746.93	15.6289	18s
14	B2	108	90.9891	7643.51	-54.7109	18s
14	B2	109	91.2787	8283.46	-57.5938	18s
14	B2	110	91.5683	7632.85	5.03125	18s
14	B2	111	91.858	6702.68	119.793	18s
14	B2	112	92.1476	6948.52	258.234	18s
14	B2	113	92.4372	5972.22	379.109	18s
14	B2	114	92.7268	5476.93	439.105	18s
14	B2	115	93.0164	5693.07	408.617	18s
14	B2	116	93.306	6716.3	285.359	18s
14	B2	117	93.5956	7263.53	98.3711	18s
14	B2	118	93.8852	5745.52	-101.848	18s
14	B2	119	94.1748	6209.05	-264.066	18s
14	B2	120	94.4644	6614.43	-357.793	18s
14	B2	121	94.754	6531.69	-383.367	18s
15	B3	1	60.0011	1.44288e+06	39541.1	18s
15	B3	2	60.291	1.43313e+06	39753.7	18s
15	B3	3	60.5809	1.42285e+06	39958.6	18s
15	B3	4	60.8708	1.41165e+06	40065.1	18s
15	B3	5	61.1606	1.40001e+06	40029.7	18s
15	B3	6	61.4505	1.38688e+06	39861.5	18s
15	B3	7	61.7404	1.37677e+06	39600.7	18s
15	B3	8	62.0303	1.36471e+06	39290	18s
15	B3	9	62.3202	1.35135e+06	38963	18s
15	B3	10	62.61	1339237	38644.6	18s
15	B3	11	62.8999	1.32835e+06	38357.7	18s
15	B3	12	63.1898	1.31585e+06	38124.4	18s
15	B3	13	63.4797	1.30441e+06	37959.2	18s
15	B3	14	63.7696	1.29297e+06	37862.1	18s
15	B3	15	64.0595	1.28043e+06	37814.2	18s
15	B3	16	64.3493	1.27038e+06	37782.4	18s
15	B3	17	64.6392	1258065	37730	18s
15	B3	18	64.9291	1.24595e+06	37632.7	18s
15	B3	19	65.219	1.23335e+06	37489.3	18s
15	B3	20	65.5089	1.22334e+06	37321.6	18s
15	B3	21	65.7988	1.2129e+06	37158.8	18s
15	B3	22	66.0886	1.20013e+06	37022.5	18s
15	B3	23	66.3785	1.18985e+06	36918.8	18s
15	B3	24	66.6684	1.1772e+06	36841.1	18s
15	B3	25	66.9583	1.16684e+06	36781.5	18s
15	B3	26	67.2482	1.1545e+06	36739	18s
15	B3	27	67.5381	1.14395e+06	36718.7	18s
15	B3	28	67.8279	1.13282e+06	36726.8	18s
15	B3	29	68.1178	1.12063e+06	36761.5	18s
15	B3	30	68.4077	1.11146e+06	36808.3	18s
15	B3	31	68.6976	1.09817e+06	36842.4	18s
15	B3	32	68.9875	1.08755e+06	36836.5	18s
15	B3	33	69.2774	1.07546e+06	36772.4	18s
15	B3	34	69.5672	1064490	36646.9	18s
15	B3	35	69.8571	1.05428e+06	36468.4	18s
15	B3	36	70.147	1.04275e+06	36257.6	18s
15	B3	37	70.4369	1030530	36020.6	18s
15	B3	38	70.7268	1.02114e+06	35765	18s
15	B3	39	71.0167	1.00898e+06	35502.1	18s
15	B3	40	71.3065	998829	35249.1	18s
15	B3	41	71.5964	988258	35025.5	18s
15	B3	42	71.8863	977995	34847.4	18s
15	B3	43	72.1762	966926	34719.3	18s
15	B3	44	72.4661	956606	34631.4	18s
15	B3	45	72.756	946784	34559	18s
15	B3	46	73.0458	936775	34469	18s
15	B3	47	73.3357	923496	34331.9	18s
15	B3	48	73.6256	915402	34134.4	18s
15	B3	49	73.9155	904498	33886.3	18s
15	B3	50	74.2054	896057	33614.3	18s
15	B3	51	74.4952	884002	33351.2	18s
15	B3	52	74.7851	875186	33123.9	18s
15	B3	53	75.075	864930	32949.7	18s
15	B3	54	75.3649	854852	32840.5	18s
15	B3	55	75.6548	846105	32806.6	18s
15	B3	56	75.9447	835216	32856.4	18s
15	B3	57	76.2345	825014	32992.5	18s
15	B3	58	76.5244	814837	33208.4	18s
15	B3	59	76.8143	805754	33490.2	18s
15	B3	60	77.1042	792981	33822.9	18s
15	B3	61	77.3941	781273	34205.4	18s
15	B3	62	77.684	770464	34667.7	18s
15	B3	63	77.9738	761564	35278.7	18s
15	B3	64	78.2637	749644	36138.4	18s
15	B3	65	78.5536	737127	37391.9	18s
15	B3	66	78.8435	724496	39109.5	18s
15	B3	67	79.1334	712147	41315.4	18s
15	B3	68	79.4233	697353	44004.2	18s
15	B3	69	79.7131	681252	47144.2	18s
15	B3	70	80.003	663952	50706.9	18s
15	B3	71	80.2929	645560	54700.9	18s
15	B3	72	80.5828	627303	59210.8	18s
15	B3	73	80.8727	607174	64432.8	18s
15	B3	74	81.1626	584126	70690.2	18s
15	B3	75	81.4524	557389	78421.8	18s
15	B3	76	81.7423	530416	88122.5	18s
15	B3	77	82.0322	496740	100220	18s
15	B3	78	82.3221	458753	114863	18s
15	B3	79	82.612	407624	131652	18s
15	B3	80	82.9019	342440	149384	18s
15	B3	81	83.1917	267452	165978	18s
15	B3	82	83.4816	189081	178723	18s
15	B3	83	83.7715	121738	184868	18s
15	B3	84	84.0614	74028.2	182424	18s
15	B3	85	84.3513	43612.7	170843	18s
15	B3	86	84.6412	28421.4	151304	18s
15	B3	87	84.931	20849.3	126432	18s
15	B3	88	85.2209	16949.3	99561.7	18s
15	B3	89	85.5108	14160.2	73861.1	18s
15	B3	90	85.8007	12235.4	51636	18s
15	B3	91	86.0906	11513.2	34136.6	18s
15	B3	92	86.3804	11918.4	21801.7	18s
15	B3	93	86.6703	11331.7	13394.6	18s
15	B3	94	86.9602	10605.5	8031.4	18s
15	B3	95	87.2501	10013.1	4817.99	18s
15	B3	96	87.54	9033.03	3003.28	18s
15	B3	97	87.8299	9600.12	2025.8	18s
15	B3	98	88.1198	8902.34	1502.82	18s
15	B3	99	88.4096	8198.79	1198.57	18s
15	B3	100	88.6995	9317.36	986.594	18s
15	B3	101	88.9894	8337.52	811.211	18s
15	B3	102	89.2793	7311.44	652.586	18s
15	B3	103	89.5692	7431.29	502.559	18s
15	B3	104	89.859	9541.18	356.012	18s
15	B3	105	90.1489	7722.58	214.625	18s
15	B3	106	90.4388	8141.38	92.9336	18s
15	B3	107	90.7287	8314.51	16.1367	18s
15	B3	108	91.0186	7762.13	7.35938	18s
15	B3	109	91.3085	7759.93	71.4414	18s
15	B3	110	91.5983	5846.72	185.996	18s
15	B3	111	91.8882	5937.45	305.973	18s
15	B3	112	92.1781	7292.36	381.102	18s
15	B3	113	92.468	7481.34	378.602	18s
15	B3	114	92.7579	6897.49	299.859	18s
15	B3	115	93.0478	6277.68	180.352	18s
15	B3	116	93.3376	6397.99	71.1055	18s
15	B3	117	93.6275	7158.41	12.5977	18s
15	B3	118	93.9174	7380.08	17.5898	18s
15	B3	119	94.2073	5427.6	72.043	18s
15	B3	120	94.4972	5765.78	149.141	18s
15	B3	121	94.7871	6249.58	224.469	18s
16	B4	1	60.0011	1.31768e+06	34139.4	18s
16	B4	2	60.291	1.30903e+06	34397.9	18s
16	B4	3	60.5809	1.29944e+06	34622.8	18s
16	B4	4	60.8708	1.2898e+06	34737.6	18s
16	B4	5	61.1606	1280371	34714.9	18s
16	B4	6	61.4505	1.26872e+06	34581.3	18s
16	B4	7	61.7404	1.25963e+06	34392.6	18s
16	B4	8	62.0303	1.24975e+06	34204	18s
16	B4	9	62.3202	1.23791e+06	34051.3	18s
16	B4	10	62.61	1.22819e+06	33946.1	18s
16	B4	11	62.8999	1.21809e+06	33881.6	18s
16	B4	12	63.1898	1.20718e+06	33837.9	18s
16	B4	13	63.4797	1.19731e+06	33790.8	18s
16	B4	14	63.7696	1.18617e+06	33720.8	18s
16	B4	15	64.0595	1.17548e+06	33618.2	18s
16	B4	16	64.3493	1.16551e+06	33483.9	18s
16	B4	17	64.6392	1155354	33325.2	18s
16	B4	18	64.9291	1.14613e+06	33153	18s
16	B4	19	65.219	1.13488e+06	32983.7	18s
16	B4	20	65.5089	1.12386e+06	32841.5	18s
16	B4	21	65.7988	1.11649e+06	32755.9	18s
16	B4	22	66.0886	1.10558e+06	32749.5	18s
16	B4	23	66.3785	1.09605e+06	32824.8	18s
16	B4	24	66.6684	1.08558e+06	32956.2	18s
16	B4	25	66.9583	1.07564e+06	33096.4	18s
16	B4	26	67.2482	1.06418e+06	33191.8	18s
16	B4	27	67.5381	1.05549e+06	33201.4	18s
16	B4	28	67.8279	1.04373e+06	33111.7	18s
16	B4	29	68.1178	1.03333e+06	32940.2	18s
16	B4	30	68.4077	1.02417e+06	32725.2	18s
16	B4	31	68.6976	1.01525e+06	32506.5	18s
16	B4	32	68.9875	1.00569e+06	32307.3	18s
16	B4	33	69.2774	994265	32130.3	18s
16	B4	34	69.5672	984660	31968.9	18s
16	B4	35	69.8571	975426	31827.6	18s
16	B4	36	70.147	966756	31710.1	18s
16	B4	37	70.4369	956495	31628.1	18s
16	B4	38	70.7268	946974	31584.3	18s
16	B4	39	71.0167	936821	31566.3	18s
16	B4	40	71.3065	927431	31551.1	18s
16	B4	41	71.5964	918208	31513.1	18s
16	B4	42	71.8863	907459	31434.1	18s
16	B4	43	72.1762	898824	31307.7	18s
16	B4	44	72.4661	888839	31139.6	18s
16	B4	45	72.756	879917	30945.8	18s
16	B4	46	73.0458	871615	30745.6	18s
16	B4	47	73.3357	861860	30556.4	18s
16	B4	48	73.6256	851657	30388	18s
16	B4	49	73.9155	844689	30242.4	18s
16	B4	50	74.2054	835222	30115.2	18s
16	B4	51	74.4952	824634	29999.3	18s
16	B4	52	74.7851	816741	29889.7	18s
16	B4	53	75.075	807894	29789.7	18s
16	B4	54	75.3649	798868	29713.7	18s
16	B4	55	75.6548	789706	29684.6	18s
16	B4	56	75.9447	780810	29726.5	18s
16	B4	57	76.2345	772741	29853.1	18s
16	B4	58	76.5244	763172	30058.1	18s
16	B4	59	76.8143	753357	30315.8	18s
16	B4	60	77.1042	742005	30595.6	18s
16	B4	61	77.3941	732747	30886.9	18s
16	B4	62	77.684	723376	31222.3	18s
16	B4	63	77.9738	713891	31681.1	18s
16	B4	64	78.2637	704542	32383.1	18s
16	B4	65	78.5536	694202	33427.2	18s
16	B4	66	78.8435	680590	34854.4	18s
16	B4	67	79.1334	670592	36671.2	18s
16	B4	68	79.4233	657663	38859.3	18s
16	B4	69	79.7131	644187	41407.9	18s
16	B4	70	80.003	629775	44337.3	18s
16	B4	71	80.2929	614489	47712.9	18s
16	B4	72	80.5828	597771	51652.7	18s
16	B4	73	80.8727	579552	56342.6	18s
16	B4	74	81.1626	558792	62055.6	18s
16	B4	75	81.4524	536986	69167	18s
16	B4	76	81.7423	511996	78130.2	18s
16	B4	77	82.0322	482713	89380.1	18s
16	B4	78	82.3221	447543	103134	18s
16	B4	79	82.612	403682	119117	18s
16	B4	80	82.9019	343789	136285	18s
16	B4	81	83.1917	271728	152728	18s
16	B4	82	83.4816	197808	165865	18s
16	B4	83	83.7715	133135	173007	18s
16	B4	84	84.0614	86034.1	172127	18s
16	B4	85	84.3513	58685.8	162552	18s
16	B4	86	84.6412	40754	145261	18s
16	B4	87	84.931	31473.8	122643	18s
16	B4	88	85.2209	27417.2	97804.3	18s
16	B4	89	85.5108	22707	73737.1	18s
16	B4	90	85.8007	21974.6	52664.5	18s
16	B4	91	86.0906	20328.2	35751.7	18s
16	B4	92	86.3804	19602.9	23531.6	18s
16	B4	93	86.6703	18726.8	15165.5	18s
16	B4	94	86.9602	17261.9	9720.1	18s
16	B4	95	87.2501	17769.3	6367.94	18s
16	B4	96	87.54	15777.9	4396.52	18s
16	B4	97	87.8299	16486.2	3269.96	18s
16	B4	98	88.1198	15412.6	2625.91	18s
16	B4	99	88.4096	14351.5	2239.57	18s
16	B4	100	88.6995	14147	1979.41	18s
16	B4	101	88.9894	13786	1770.61	18s
16	B4	102	89.2793	13368	1573.49	18s
16	B4	103	89.5692	14058.4	1374.45	18s
16	B4	104	89.859	13269.3	1180.77	18s
16	B4	105	90.1489	12667.6	1011.49	18s
16	B4	106	90.4388	12561.8	883.764	18s
16	B4	107	90.7287	11821	801.445	18s
16	B4	108	91.0186	12602.3	753	18s
16	B4	109	91.3085	12005.1	719.281	18s
16	B4	110	91.5983	11254.8	684.252	18s
16	B4	111	91.8882	11503.2	640.586	18s
16	B4	112	92.1781	11060.2	588.084	18s
16	B4	113	92.468	11446.6	529.516	18s
16	B4	114	92.7579	11179.9	469.086	18s
16	B4	115	93.0478	10994.7	413.693	18s
16	B4	116	93.3376	10625.8	372.887	18s
16	B4	117	93.6275	11049.4	354.746	18s
16	B4	118	93.9174	10280	359.949	18s
16	B4	119	94.2073	10181.2	379.178	18s
16	B4	120	94.4972	10190.7	396.822	18s
16	B4	121	94.7871	10085.2	398.812	18s
17	B5	1	60.0013	1.35749e+06	36635.3	18s
17	B5	2	60.2906	1347322	36771.4	18s
17	B5	3	60.58	1.33926e+06	36865.6	18s
17	B5	4	60.8693	1.32771e+06	36828.5	18s
17	B5	5	61.1586	1.31766e+06	36630.5	18s
17	B5	6	61.448	1.30602e+06	36306.1	18s
17	B5	7	61.7373	1295211	35927	18s
17	B5	8	62.0266	1.2864e+06	35562.3	18s
17	B5	9	62.316	1.27461e+06	35255	18s
17	B5	10	62.6053	1.26322e+06	35019.8	18s
17	B5	11	62.8946	1.25293e+06	34850.3	18s
17	B5	12	63.184	1.24269e+06	34727.3	18s
17	B5	13	63.4733	1.23234e+06	34626	18s
17	B5	14	63.7626	1.22061e+06	34521.4	18s
17	B5	15	64.052	1.21099e+06	34400.4	18s
17	B5	16	64.3413	1.19863e+06	34267.3	18s
17	B5	17	64.6306	1.19012e+06	34142.8	18s
[truncated: 7,485 more rows]

## Sheet: Melt Curve Result
Block Type	96-Well 0.2-mL Block
Calibration Background is expired	No
Calibration Background performed on	08-01-2022
Calibration Pure Dye ABY is expired	No
Calibration Pure Dye ABY performed on	08-01-2022
Calibration Pure Dye CY5 is expired	No
Calibration Pure Dye CY5 performed on	08-01-2022
Calibration Pure Dye FAM is expired	No
Calibration Pure Dye FAM performed on	08-01-2022
Calibration Pure Dye JUN is expired	No
Calibration Pure Dye JUN performed on	08-01-2022
Calibration Pure Dye MUSTANG PURPLE is expired	No
Calibration Pure Dye MUSTANG PURPLE performed on	08-01-2022
Calibration Pure Dye NED is expired	No
Calibration Pure Dye NED performed on	08-01-2022
Calibration Pure Dye ROX is expired	No
Calibration Pure Dye ROX performed on	08-01-2022
Calibration Pure Dye SYBR is expired	No
Calibration Pure Dye SYBR performed on	08-01-2022
Calibration Pure Dye TAMRA is expired	No
Calibration Pure Dye TAMRA performed on	08-01-2022
Calibration Pure Dye VIC is expired	No
Calibration Pure Dye VIC performed on	08-01-2022
Calibration ROI is expired	No
Calibration ROI performed on	08-01-2022
Calibration Uniformity is expired	No
Calibration Uniformity performed on	08-01-2022
Chemistry	SYBR_GREEN
Date Created	2023-12-01 04:10:17 AM CST
Experiment Barcode
Experiment Comment
Experiment File Name	D:\datas\huang lab\qxy\2023-12-01_023705.eds
Experiment Name	2023-12-01_023705
Experiment Run End Time	2023-12-01 01:07:46 AM CST
Experiment Type	Standard Curve
Instrument Name	272520824
Instrument Serial Number	272520824
Instrument Type	QuantStudio™ 5 System
Passive Reference	ROX
Post-read Stage/Step
Pre-read Stage/Step
Quantification Cycle Method	Ct
Signal Smoothing On	true
Stage where Melt Analysis is performed	Stage3
Stage/ Cycle where Ct Analysis is performed	Stage2, Step2
User Name
Well	Well Position	Sample	Target Name	Tm	Melt Peak Height
1	A1	xin	18s	84.1834	172084
2	A2	xin	18s	84.1834	190780
3	A3	xin	18s	83.9164	191064
4	A4	zigong	18s	83.9164	170327
5	A5	zigong	18s	83.8713	167373
6	A6	zigong	18s	83.8713	153325
7	A7	xin	asb3	82.4458	179667
8	A8	xin	asb3	82.4458	139329
9	A9	xin	asb3	82.4421	184819
10	A10	zigong	asb3	82.1525	170507
11	A11	zigong	asb3	82.4639	158426
12	A12	zigong	asb3	82.6089	158179
13	B1	gan	18s	84.0386	164618
14	B2	gan	18s	83.8938	178126
15	B3	gan	18s	83.7715	184868
16	B4	ruanchao	18s	83.9164	173649
17	B5	ruanchao	18s	83.7267	178647
18	B6	ruanchao	18s	83.8713	169577
19	B7	gan	asb3	82.301	165020
20	B8	gan	asb3	82.5907	181004
21	B9	gan	asb3	82.4421	173248
22	B10	ruanchao	asb3	82.2973	170305
23	B11	ruanchao	asb3	82.4639	167913
24	B12	ruanchao	asb3	82.4639	152876
25	C1	pi	18s	83.749	164115
26	C2	pi	18s	83.6042	167837
27	C3	pi	18s	83.6266	196811
28	C4	jiruo	18s	83.9164	164372
29	C5	jiruo	18s	83.8713	166986
30	C6	jiruo	18s	83.8713	167907
31	C7	pi	asb3	82.1562	159607
32	C8	pi	asb3	82.1562	163930
33	C9	pi	asb3	82.0077	166118
34	C10	jiruo	asb3	82.1525	134576
35	C11	jiruo	asb3	82.4639	157694
36	C12	jiruo	asb3	82.4639	162496
37	D1	fei	18s	83.749	163002
38	D2	fei	18s	83.749	178798
39	D3	fei	18s	83.9164	188273
40	D4	gaowan	18s	83.7715	156674
41	D5	gaowan	18s	83.8713	176094
42	D6	gaowan	18s	83.7267	160097
43	D7	fei	asb3	82.1562	163673
44	D8	fei	asb3	82.301	169337
45	D9	fei	asb3	82.1525	172756
46	D10	gaowan	asb3	82.1525	151360
47	D11	gaowan	asb3	82.319	171239
48	D12	gaowan	asb3	82.319	173078
49	E1	shen	18s	83.749	169792
50	E2	shen	18s	83.6042	168066
51	E3	shen	18s	83.9164	170241
52	E4	zhifang	18s	83.9164	153445
53	E5	zhifang	18s	83.7267	171991
54	E6	zhifang	18s	83.7267	159380
55	E7	shen	asb3	82.0114	162486
56	E8	shen	asb3	82.1562	161519
57	E9	shen	asb3	82.1525	154005
58	E10	zhifang	asb3	82.2973	161116
59	E11	zhifang	asb3	82.319	164997
60	E12	zhifang	asb3	82.319	152418
61	F1	nao	18s	83.749	151281
62	F2	nao	18s	83.749	171072
63	F3	nao	18s	83.9164	174086
67	F7	nao	asb3	82.1562	153744
68	F8	nao	asb3	82.301	175974
69	F9	nao	asb3	82.1525	160056
73	G1	chang	18s	83.749	161772
74	G2	chang	18s	83.8938	176740
75	G3	chang	18s	84.0614	178415
79	G7	chang	asb3	82.1562	146244
80	G8	chang	asb3	82.301	173650
81	G9	chang	asb3	82.2973	169745
85	H1	wei	18s	83.8938	151893
86	H2	wei	18s	83.8938	174565
87	H3	wei	18s	84.0614	149031
91	H7	wei	asb3	82.301	157344
92	H8	wei	asb3	82.1562	147125
93	H9	wei	asb3	82.2973	166108
