# Supplementary material for: ASB3 ablation has no detectable effects on spermatogenesis and fertility in male mice
Source: PeerJ journal article supplement (doi:10.7717/peerj.19738), 2025-07-31
Supplement: RawdataFig2.zip [file Asb3-KO mice by CRISPR-Cas9.pdf › Picture 2/Asb3-KO mice by CRISPR-Cas9.pdf]

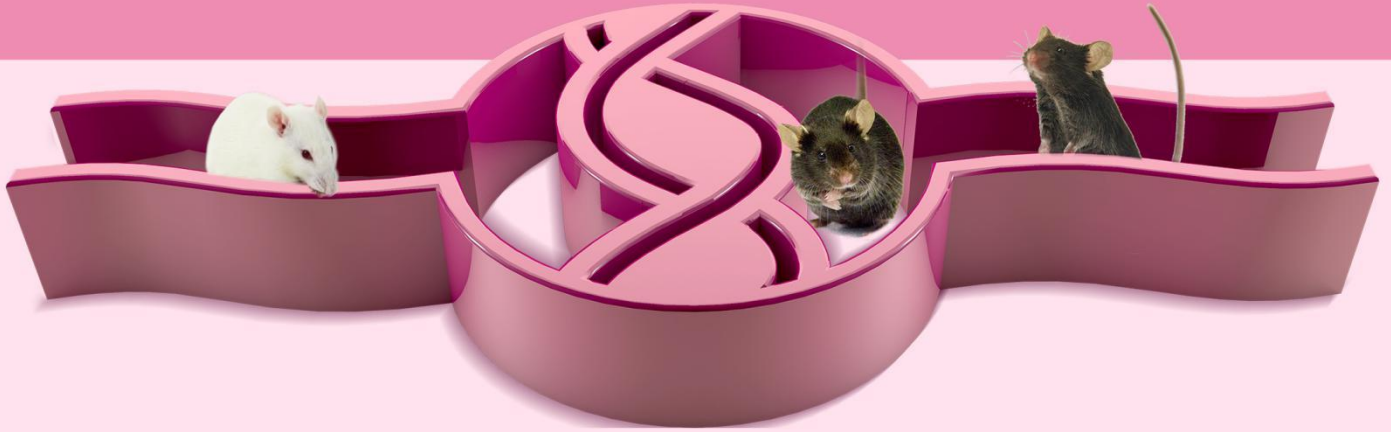

# 项目报告

协议号: KOAI220615LJ9

项目名称: 小鼠 Asb3 基因敲除模型

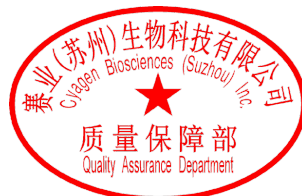

- 保密 -

## 目录

|                           |    |
|---------------------------|----|
| 1. 产品信息 .....             | 2  |
| 2. gRNA 靶序列 .....         | 2  |
| 3. 交付鼠验证结果 .....          | 3  |
| 3.1. 交付鼠信息 .....          | 3  |
| 3.2. 交付鼠的同源臂 PCR 验证 ..... | 4  |
| 3.2.1. 引物设计策略 .....       | 4  |
| 3.2.2. PCR 实验条件 .....     | 5  |
| 3.2.3. PCR 鉴定结果 .....     | 6  |
| 3.2.4. 注意事项 .....         | 6  |
| 3.3. 交付鼠的测序验证 .....       | 7  |
| 3.3.1. 引物设计策略 .....       | 7  |
| 3.3.2. 测序引物 .....         | 7  |
| 3.3.3. 测序结果 .....         | 7  |
| 4. 后续育种建议及基因分型策略 .....    | 8  |
| 4.1. PCR 鉴定策略 .....       | 8  |
| 4.2. 繁殖路线示例 .....         | 8  |
| 5. 实验方法-DNA 提取 .....      | 11 |
| 5.1. 试剂盒提取法 .....         | 11 |
| 5.2. 粗提法 .....            | 12 |
| 6. 相关试剂 .....             | 14 |

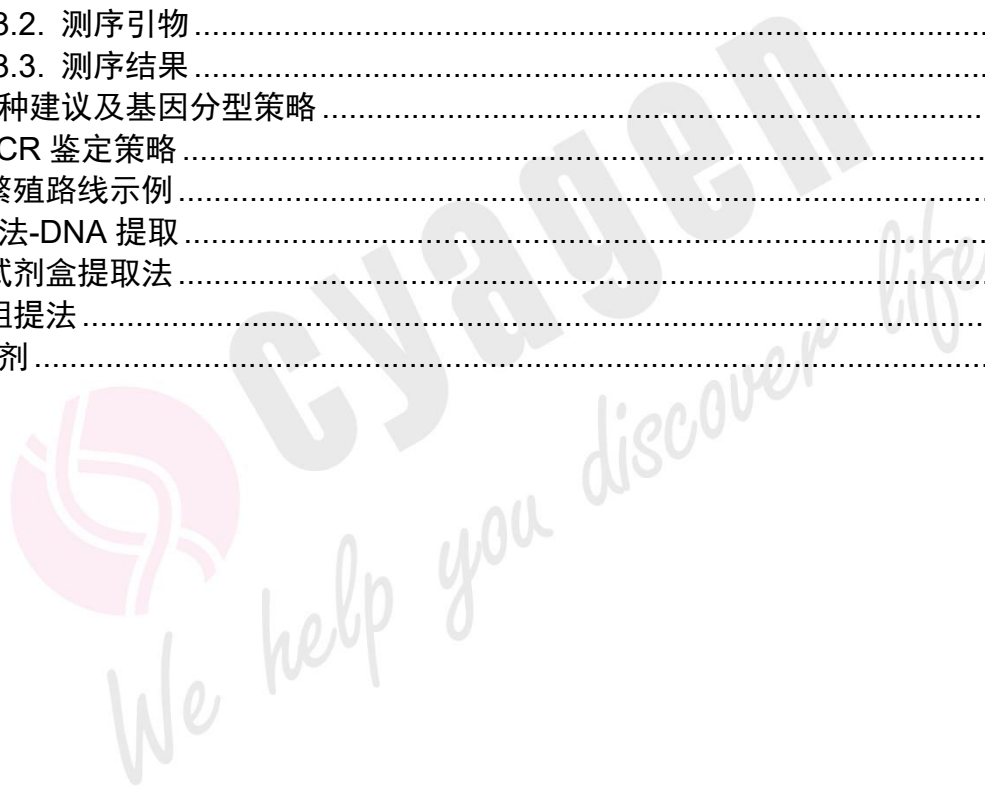

## 1. 产品信息

|        |                                 |
|--------|---------------------------------|
| 品系名称   | C57BL/6J-Asb3 <sup>em1Cya</sup> |
| 品系编号   | KOCMP-65257-Asb3-B6J-VA         |
| 基因名    | Asb3                            |
| NCBI 号 | 65257                           |
| 品系背景   | C57BL/6J                        |
| 修饰方式   | conventional knockout           |

## 2. gRNA 靶序列

gRNA-A1 : TCTCTGATACGGGTTGACTAAGG

gRNA-A2 : GTGAGGTTGATAATGCCGGATTGG

gRNA-B1 : ACTAGATAAGTACAGGTCTAGGGG

gRNA-B2 : AGAAGTGAGGTTGATAATGCCCGG

### 3. 交付鼠验证结果

#### 3.1. 交付鼠信息

| F1代小鼠            |                  |
|------------------|------------------|
| 2 Males ♂        | 2 Females ♀      |
| 出生日期: 09-20-2022 | 出生日期: 09-20-2022 |
| 小鼠 ID: 1, 2      | 小鼠 ID: 5, 6      |
| 品系: C57BL/6J     | 品系: C57BL/6J     |
| 基因型: (+/-)杂合     | 基因型: (+/-)杂合     |

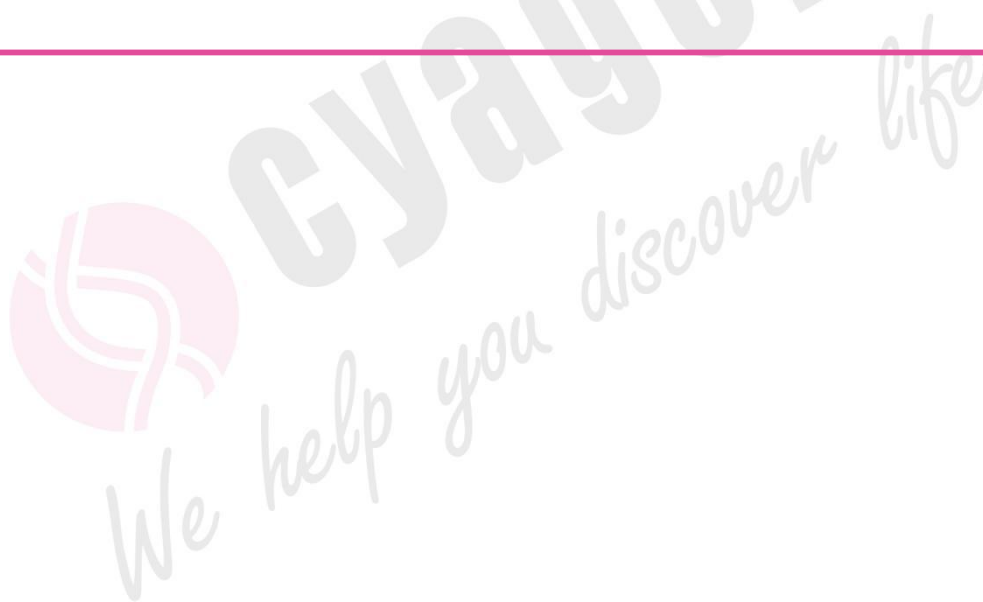

## 3.2. 交付鼠的同源臂 PCR 验证

### 3.2.1. 引物设计策略

F1/R1 扩增目的基因删除后的阳性，获得 418 bp 片段则说明打靶成功。

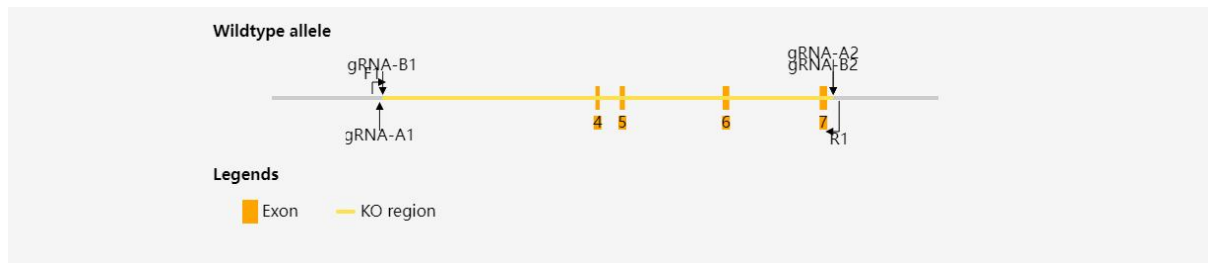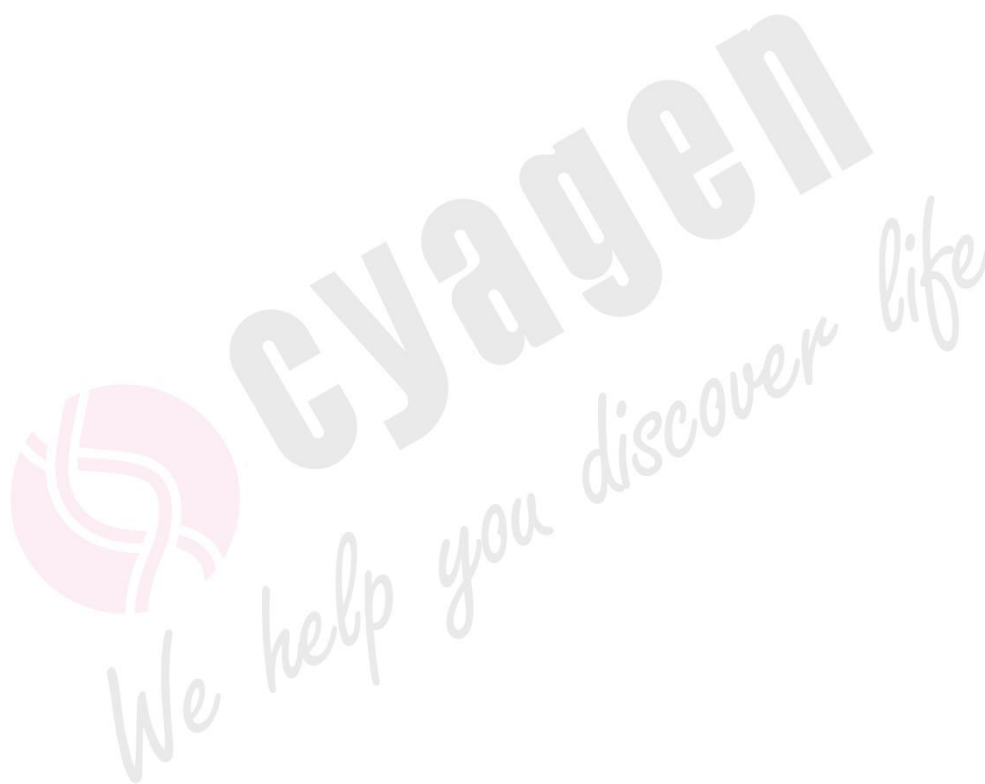

### 3.2.2. PCR 实验条件

引物信息:

F1: 5'-TCTGACTCTTAGAATCTTCCCACCTCT-3'

R1: 5'-GAAGCAGTCAGCACCTTACTTGAT-3'

阳性条带: 418 bp      野生型条带: 12349 bp

PCR 反应体系: (推荐使用 Premix Taq Polymerase: Vazyme, P222)

| Component              | x1   |    |
|------------------------|------|----|
| Mouse tail genomic DNA | 1    | μL |
| Forward primer (10 μM) | 1    | μL |
| Reverse primer (10 μM) | 1    | μL |
| Premix Taq Polymerase  | 12.5 | μL |
| ddH <sub>2</sub> O     | 9.5  | μL |
| Total                  | 25   | μL |

PCR 反应条件:

| Step                 | Temp. | Time  | Cycles |
|----------------------|-------|-------|--------|
| Initial denaturation | 94 °C | 3 min |        |
| Denaturation         | 94 °C | 30 s  | 35 x   |
| Annealing            | 60 °C | 35 s  |        |
| Extension            | 72 °C | 35 s  |        |
| Additional extension | 72 °C | 5 min |        |

### 3.2.3. PCR 鉴定结果

1,2,5,6 号小鼠经鉴定目的基因删除后阳性。琼脂糖凝胶电泳结果如下：

Marker                      目的基因删除引物 (MT: 418 bp; WT: 12349 bp)

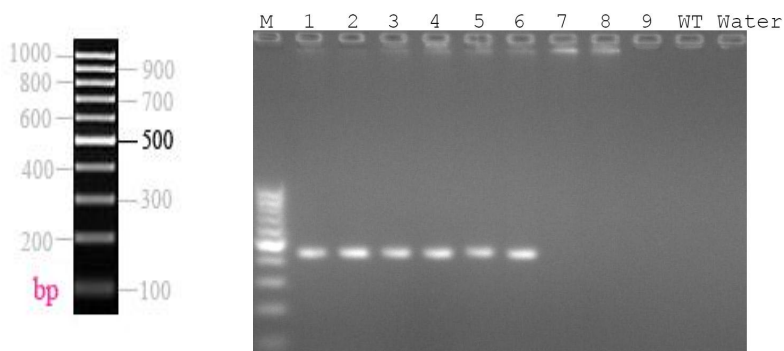

### 3.2.4. 注意事项

- 1) 按照 PCR 标准体系配制 25  $\mu$ LPCR 混合液，PCR 循环数推荐设置为 35；
- 2) 使用的 Premix Taq Polymerase: Vazyme, P222；
- 3) PCR 基因分型使用两组对照：
  - 阴性对照 (WT)：野生型小鼠 DNA；
  - 空白对照 (Water)：ddH<sub>2</sub>O。

### 3.3. 交付鼠的测序验证

#### 3.3.1. 引物设计策略

将 3.2.2 步骤中 PCR 扩增得到的 DNA 产物送一代测序，确认打靶情况。

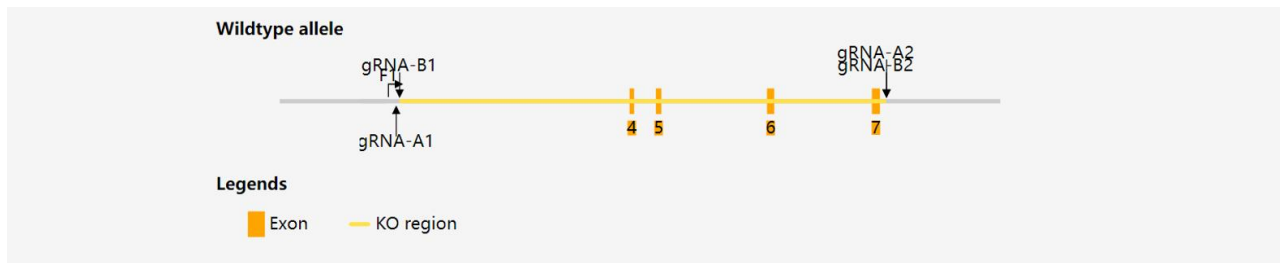

#### 3.3.2. 测序引物

F1: 5'-TCTGACTCTTAGAATCTTCCCACCTCT-3'

#### 3.3.3. 测序结果

1,2,5,6 号小鼠测序结果为删除 11931 bp。

CTGCATTCTTTCCAGGATGAGTATTTGACTTTCCCCTA--del 11931 bp--TGGTTTATCTTTTCTTTTGGACCTGGATTACACTTTTAG

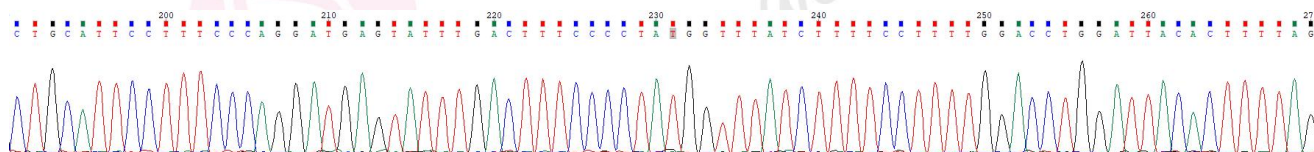

## 4. 后续育种建议及基因分型策略

### 4.1. PCR 鉴定策略

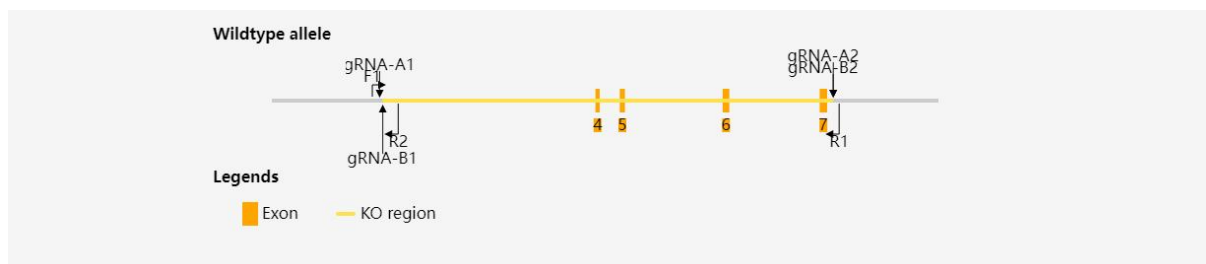

- F1/R1 引物：若扩增出目的条带，则判定目的基因成功删除。
- F1/R2 引物：若扩增出目的条带，则判定目的基因未成功删除。

综合 F1/R1 引物和 F1/R2 引物的扩增结果，判定出基因型包括(-/-)纯合子、(+/-)杂合子、(+/+)野生型。

### 4.2. 繁殖路线示例

注意下述繁育方案仅作参考，繁殖时需根据实际情况调整繁殖路线。

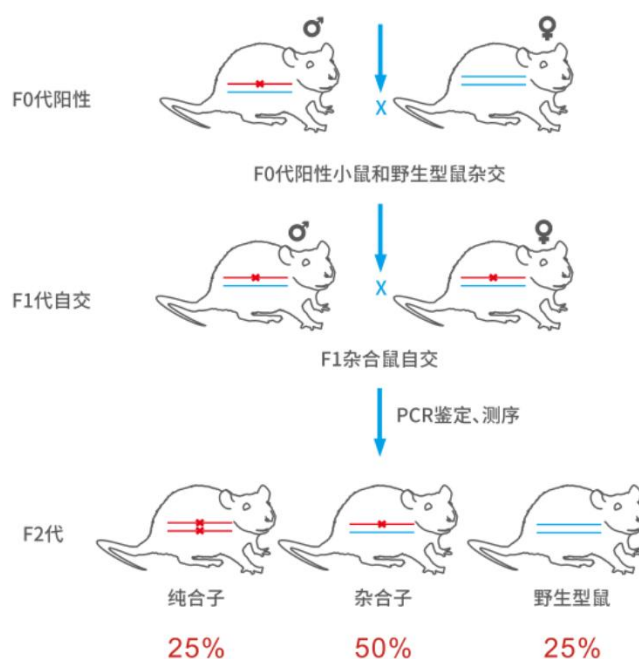

4.2.1. 步骤: 通过(+/-)杂合子小鼠自交可以产生(-/-)纯合子小鼠, 使用以下引物组判定基因型。

引物组 1:

F1: 5'-TCTGACTCTTAGAATCTTCCCACCTCT-3'

R1: 5'-GAAGCAGTCAGCACCTTACTTGAT-3'

目的基因敲除阳性: 418 bp

引物组 2:

F1: 5'-TCTGACTCTTAGAATCTTCCCACCTCT-3'

R2: 5'-GCAGCTGAGTGTGCAAGAAGGTATA-3'

目的基因未敲除阴性: 686 bp

(-/-)纯合子: 418 bp

(+/-)杂合子: 418 bp, 686 bp

(WT)野生型: 686 bp

**注意点:**

1. 如果 PCR 扩增出非目标条带, 请联系我们。

#### 4.2.2. PCR 实验条件

PCR 反应体系：（推荐使用 Premix Taq Polymerase: Vazyme, P222）

| Component              | x1   |    |
|------------------------|------|----|
| Mouse tail genomic DNA | 1    | μL |
| Forward primer (10 μM) | 1    | μL |
| Reverse primer (10 μM) | 1    | μL |
| Premix Taq Polymerase  | 12.5 | μL |
| ddH <sub>2</sub> O     | 9.5  | μL |
| Total                  | 25   | μL |

PCR 反应条件：

| Step                 | Temp. | Time  | Cycles |
|----------------------|-------|-------|--------|
| Initial denaturation | 94 °C | 3 min |        |
| Denaturation         | 94 °C | 30 s  | 35 x   |
| Annealing            | 60 °C | 35 s  |        |
| Extension            | 72 °C | 35 s  |        |
| Additional extension | 72 °C | 5 min |        |

#### 4.2.3. 注意事项

- 1) 使用的 Premix Taq Polymerase: Vazyme, P222;
- 2) PCR 基因分型使用两组对照:  
 阴性对照 (WT) : 野生型小鼠 DNA;  
 空白对照 (Water) : ddH<sub>2</sub>O。

## 5. 实验方法-DNA 提取

### 5.1. 试剂盒提取法

使用 TaKaRa MiniBEST Universal Genomic DNA Extraction kit (Ver.5.0\_Code No. 9765) 提取鼠尾 DNA。

#### 5.1.1. 准备工作

- 1) 备好无水乙醇；
- 2) WB 使用前需要加入 65 mL 的无水乙醇；  
**注：试剂盒推荐 56 mL，但长期数据显示，加入 65 mL 提取的基因组纯度更高。**
- 3) Buffer GL 若出现沉淀，请于 56 °C 加热溶解，待恢复至室温后使用；
- 4) 洗脱膜上的 DNA 时，用 0.25 x TE buffer 洗脱的 DNA 保存时间更持久；TE buffer 使用前放置 56 °C 预热，DNA 洗脱效率更高。

#### 5.1.2. 实验流程

- 1) 每个装有样品（2-5mm 鼠尾）的 EP 管中加 180  $\mu$ L Buffer GL、20  $\mu$ L 蛋白酶 K（用试剂盒里的蛋白酶 K 加 20  $\mu$ L 即可，该浓度是 20 mg/mL）、10  $\mu$ L 的 RNA 酶；  
**注：鼠尾不能太长，一般 2~5 mm；如果鼠尾过粗，可以增大裂解体系至 300  $\mu$ L。**
- 2) 放置 56 °C 烘箱过夜反应（一般 12~16 h）；
- 3) 第二天早上从烘箱取出样品放置离心机里，12000 rpm 离心 2 min，将毛发杂质离到管底；
- 4) 吸取上清至另一干净的 EP 管中（注：尽量不要吸到管底的毛发和杂质），再加入 200  $\mu$ L Buffer GB 和 200  $\mu$ L 的无水乙醇，盖好盖子后上下颠倒混匀；
- 5) 混匀后将液体转移至准备好的吸附柱中，12000 rpm 离心 2 min，弃滤液；
- 6) 向吸附柱中加入 500  $\mu$ L Buffer WA，12000 rpm 离心 1 min，弃滤液；
- 7) 吸附柱的管壁四周加入 700  $\mu$ L Buffer WB，静置 1 min，再 12000 rpm 离心 1 min；弃滤液；  
**注：一定要保证 WB 中已经加过了指定体积的无水乙醇；沿着吸附柱管壁四周加入 WB，有助于完全冲洗沾附管壁上的盐分。**
- 8) 重复操作步骤 5.12.中 7），弃滤液；

- 9) 空甩：12000 rpm 离心 2 min；
- 10) 将吸附柱放置在一个新的 1.5 mL 的离心管上，盖子开着，室温放置 10 min，以去除残留的乙醇；  
**注：乙醇残留会抑制聚合酶扩增。**
- 11) 向吸附柱膜的中央加入 50  $\mu$ L 预热过的 0.25 x TE buffer，盖好盖子后室温静置 10 min；（注：预热的灭菌水可以提高洗脱效率）
- 12) 12000 rpm 离心 2 min 洗脱 DNA；可以将离下的液体再次加入膜中央，再静置 5 min，再 12000 rpm 离心 2 min，获得浓度更高的 DNA；
- 13) 检测获得 DNA 的浓度，也可以通过电泳观察纯度。

## 5.2. 粗提法

使用粗裂的方法粗提鼠尾或鼠爪基因组 DNA，适用于扩增 <1 kb 的条带。

### 5.2.1. Triton 裂解液的配制（1 L 量）：

- 1) 分别用电子天平称取下列物品至烧杯：  
KCl: 3.7 g ; Tris: 1.2 g;
- 2) 加入 300~400 mL 灭菌水溶解；
- 3) 加入 1 mL TritonX-100 充分溶解，若不能充分溶解可以放入 56 $^{\circ}$ C 烘箱中溶解；  
**注：**TritonX-100 呈油状液体，吸取前先润洗移液器；排空 TritonX-100 后，才能把吸头伸到溶液中反复吹吸，避免 TritonX-100 大量残留在吸头内壁上。
- 4) 加入 80  $\mu$ L 浓盐酸调 pH 至 9.0；
- 5) 然后用灭菌水定容至 1 L 后，室温保存，待用。  
**注：**请勿高压灭菌 TritonX-100，高压灭菌后 TritonX-100 会产生大量沉淀。

### 5.2.2. 样品的裂解

- 1) 取鼠尾或鼠爪（~2mm）至 EP 管，加入 98  $\mu$ L 裂解液、2  $\mu$ L 20 mg/mL 的蛋白酶 K；  
**注：**  
① 鼠尾不可超过 3mm，不然裂解不充分；

- ② 若鼠尾过粗，可以适量增加裂解液的量；
  - ③ 蛋白酶 K 需要注意不要反复冻融，不然会影响活性。
- 2) 加入裂解液和蛋白酶 K 后，将 EP 管放入 56℃ 恒温设备（烘箱或者水浴锅），过夜运行；
  - 3) 第二天从恒温设备中取出样品，放置金属浴或者 PCR 仪中，98℃ 反应 15 min，使蛋白酶 K 失活；
  - 4) 将样品离心 15 min，上清即可作为 PCR 模板。

注：一般 25  $\mu$ L 的 PCR 体系中，加入 1.5  $\mu$ L 的上清。

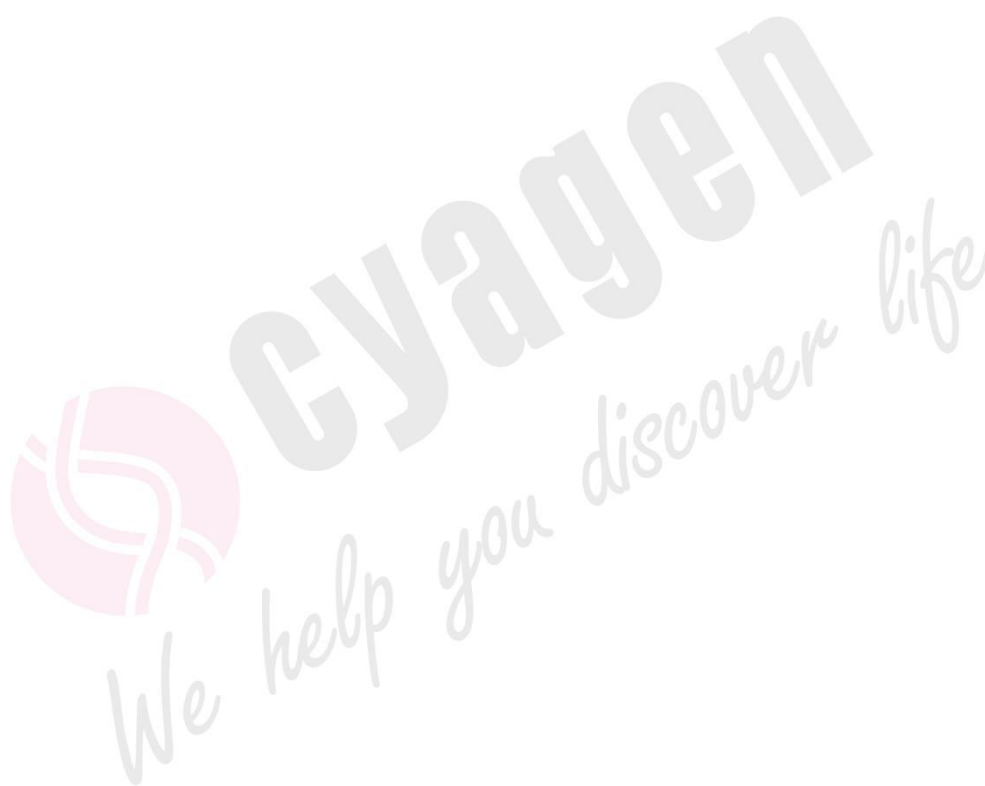

## 6. 相关试剂

|                                  |                                                    |
|----------------------------------|----------------------------------------------------|
| Tris 盐酸盐溶液                       | Sigma, T2663                                       |
| 蛋白酶 K                            | SunShineBio, P0021                                 |
| Triton X-100                     | Sigma, T8787-50 mL                                 |
| Premix Taq Polymerase            | 诺唯赞, P222                                          |
|                                  | 诺唯赞, P112-03                                       |
| MgSO <sub>4</sub> (25 mM)        | TOYOBO CO, Code: KOD-401                           |
| 10 X PCR Buffer for KOD-Plus-Neo |                                                    |
| KOD-Plus-Neo                     |                                                    |
| DMSO                             | Wak-chemie                                         |
| 琼脂糖                              | BIOWEST AGAROSE, REGULAR                           |
| DNA 分子量标准                        | Thermo Scientific GeneRuler 100 bp DNA 分子量标#SM0241 |
|                                  | Thermo Scientific GeneRuler 1 kb DNA 分子量标准#SM0311  |
|                                  | 诺唯赞 DL2000 Plus DNA Marker #MD101-01               |
| 0.5×TBE                          | Tris Bio Basic Inc, TBO194-500g                    |
|                                  | EDTA Shanghai Sangon, 0105-500g                    |
|                                  | Boric Acid, Shanghai Sangon, 0588-500g             |
| 1×TAE                            | Tris Bio Basic Inc, TBO194-500g                    |
|                                  | EDTA Shanghai Sangon, 0105-500g                    |
|                                  | Acetic Acid, Dongdu CAS: 64-19-7-500 mL            |
