# Supplementary material for: ASB3 ablation has no detectable effects on spermatogenesis and fertility in male mice
Source: PeerJ journal article supplement (doi:10.7717/peerj.19738), 2025-07-31
Supplement: RawdataFig2.zip [file ASB3多物种间保守性分析.pdf › Picture 2/Protein sequence alignment/ASB3多物种间保守性分析.pdf]

### ASB3保守性分析

|                      |       |        |     |     |     |     |     |     |     |     |     |     | Section 1 |
|----------------------|-------|--------|-----|-----|-----|-----|-----|-----|-----|-----|-----|-----|-----------|
|                      | (1)   | 1      | 10  | 20  | 30  | 40  | 50  | 60  | 70  | 80  | 90  | 100 |           |
| Homo sapiens (Human) | (1)   | MDFTEA | A   | T   | C   | S   | T   | V   | G   | L   | A   | A   | E         |
| Rhesus macaque       | (1)   | MDFTEA | A   | T   | C   | S   | T   | V   | G   | L   | A   | A   | E         |
| Pia                  | (1)   | MDFTEA | S   | T   | C   | S   | T   | V   | G   | L   | A   | A   | E         |
| Horse                | (1)   | MDFTEA | S   | T   | C   | S   | T   | V   | G   | L   | A   | A   | E         |
| Mus musculus (Mouse) | (1)   | MDFTEA | S   | T   | C   | S   | T   | V   | G   | L   | A   | A   | E         |
| African clawed frog  | (1)   | MDFTEA | T   | R   | C   | S   | S   | V   | G   | H   | A   | A   | T         |
| Zebrafish            | (1)   | MDFTEA | C   | A   | S   | S   | C   | A   | A   | A   | D   |     |           |
| Consensus            | (1)   | MDFTEA | A   | T   | C   | S   | T   | V   | G   | L   | A   | A   | E         |
|                      |       |        |     |     |     |     |     |     |     |     |     |     | Section 2 |
|                      | (101) | 101    | 110 | 120 | 130 | 140 | 150 | 160 | 170 | 180 | 190 | 200 |           |
| Homo sapiens (Human) | (100) | EAGADP | N   | A   | T   | L   | E   | E   | T   | P   | L   | F   | L         |
| Rhesus macaque       | (100) | EAGADP | N   | A   | T   | L   | E   | E   | T   | P   | L   | F   | L         |
| Pia                  | (100) | EAGADP | N   | A   | T   | L   | E   | E   | T   | P   | L   | F   | L         |
| Horse                | (100) | EAGADP | N   | A   | T   | L   | E   | E   | T   | P   | L   | F   | L         |
| Mus musculus (Mouse) | (100) | EAGADP | N   | A   | T   | L   | E   | E   | T   | P   | L   | F   | L         |
| African clawed froa  | (100) | QAGADP | E   | V   | N   | E   | E   | T   | T   | P   | L   | F   | L         |
| Zebrafish            | (101) | KAGADP | R   | K   | N   | D   | L   | S   | C   | P   | L   | F   | L         |
| Consensus            | (101) | EAGADP | N   | A   | T   | L   | E   | E   | T   | P   | L   | F   | L         |
|                      |       |        |     |     |     |     |     |     |     |     |     |     | Section 3 |
|                      | (201) | 201    | 210 | 220 | 230 | 240 | 250 | 260 | 270 | 280 | 290 | 300 |           |
| Homo sapiens (Human) | (200) | S      | --- | S   | G   | A   | N   | V   | N   | C   | A   | L   | D         |
| Rhesus macaque       | (200) | S      | --- | S   | G   | A   | N   | V   | N   | C   | A   | L   | D         |
| Pia                  | (200) | S      | --- | S   | G   | A   | N   | V   | N   | C   | A   | L   | D         |
| Horse                | (200) | S      | --- | S   | G   | A   | N   | V   | N   | C   | A   | L   | D         |
| Mus musculus (Mouse) | (200) | S      | --- | S   | G   | A   | N   | V   | N   | C   | A   | L   | D         |
| African clawed froa  | (200) | L      | H   | E   | L   | H   | Y   | V   | S   | G   | A   | N   | V         |
| Zebrafish            | (200) | N      | --- | A   | S   | G   | A   | N   | V   | N   | C   | A   | L         |
| Consensus            | (201) | S      | --- | S   | G   | A   | N   | V   | N   | C   | A   | L   | D         |
|                      |       |        |     |     |     |     |     |     |     |     |     |     | Section 4 |
|                      | (301) | 301    | 310 | 320 | 330 | 340 | 350 | 360 | 370 | 380 | 390 | 400 |           |
| Homo sapiens (Human) | (294) | DCLEML | L   | N   | G   | Y   | S   | P   | D   | A   | Q   |     |           |
| Rhesus macaque       | (294) | DCLEML | L   | N   | G   | Y   | S   | P   | D   | A   | Q   |     |           |
| Pia                  | (294) | ECLEML | L   | N   | G   | Y   | S   | P   | D   | A   | Q   |     |           |
| Horse                | (294) | ACLEML | L   | N   | G   | Y   | S   | P   | D   | A   | Q   |     |           |
| Mus musculus (Mouse) | (294) | ECLEML | L   | N   | G   | Y   | S   | P   | D   | A   | Q   |     |           |
| African clawed froa  | (300) | DCLEML | L   | N   | G   | Y   | S   | P   | D   | A   | Q   |     |           |
| Zebrafish            | (294) | DS     | R   | A   | L   | L   | N   | G   | Y   | S   | P   | D   |           |
| Consensus            | (301) | DCLEML | L   | N   | G   | Y   | S   | P   | D   | A   | Q   |     |           |

### ASB3保守性分析

Section 5

|                            | (401)  | 401      | 410       | 420      | 430      | 440          | 450          | 460        | 470     | 480         | 490             | 500                 |
|----------------------------|--------|----------|-----------|----------|----------|--------------|--------------|------------|---------|-------------|-----------------|---------------------|
| Homo sapiens (Human) (383) | HAIKAQ | AKYKEWLP | HLIVAGFD  | LLILCN   | SWIDSVSI | ITLT         | LFTLEFTNWK   | TPPAVERMLS | SARASN  | AWILQQHIAT  | VPSL            | THLCRLEIRSSLKSERLR  |
| Rhesus macaque (383)       | HAIKAQ | AKYKEWLP | HLIVAGFD  | QILCS    | SWIDSVSI | ITLT         | LFTLEFTNWK   | TPPAVERMLS | SARASN  | AWILQQHIAT  | VPSL            | THLCRLEIRSSLKSERLR  |
| Pia (383)                  | HAVKAQ | TKYKENLS | LLLAGFDE  | INILCS   | SWIDSVSD | IVL          | LFTLEFTNWRRL | PPAVEKMLS  | SARASNS | SWALQQHIASV | PSL             | THLCRVEIRSSLKPEHLR  |
| Horse (383)                | HAIKAQ | TKYKENLS | LLLAGFDE  | INILCS   | SWIDSVSD | ITLT         | LFTLEFTNWKRL | PPAVEKMLS  | ASNAS   | SWALQQHIASV | PSL             | THLCRLEIRSLRKPGLHLR |
| Mus musculus (Mouse) (383) | YAVKAQ | TKYKAWLP | HLLAGFDE  | LLILCSS  | WVDSAD   | ITLT         | LFTLFSNWKRL  | PPAVEKMLSV | RANS    | SWALQQHLASV | PSL             | THLCRLEIRASLKAHLH   |
| African clawed frog (387)  | YVCNAQ | QWEENL   | LLLAGFDE  | LLILHIDV | VWIRSVN  | DFN          | LFTLEFTDKRRL | PPGHVEQY   | SVQRKAS | ARTQLKPF    | ETIPA           | MHLCRILQIRSLTTLTLR  |
| Zebrafish (393)            | RALTEV | KDASFL   | HLKAGLD   | MLAQD    | KLLEAGN  | ANF          | EFVNNKT      | TPSEMQLI   | AHRR    | AGETW       | TPRKHFE         | SVVLAHLCLRLAVGAHVGS |
| Consensus (401)            | HAIKAQ | KYKEWLP  | LLLAGFDPL | ILLCS    | SWIDSVSD | LFTLEFTNWKRL | PPAVEKMLS    | SARASN     | AW      | LQQHIASVPSL | THLCRLEIRSSLKSE | LR                  |

Consensus (501)

(501) 501 510 520 530 549

Homo sapiens (Human) (481) SDSY S Q D L P R S L H N Y L L Y A D V L R M Y E V P E L A A I Q D G -----

Rhesus macaque (481) SDSY S E L P L R S L H N Y L L Y A D V L R M Y E V P E L A A I Q D G -----

Pia (482) C D N F H Q L P L R S L H D Y L L Y A E V L R M N E I P E L A V I Q D E E I S E A T -----

Horse (482) SDSF C Q D L P R S L H N Y L L Y A D V L R M N E V P E L A V I Q G E E I S E A T -----

Mus musculus (Mouse) (482) S D I F H Q L P L R S L Q N Y L L Y E E V L R M N E I L E P A A N Q D G E T S K A T -----

African clawed frog (486) S A E F C T L P L V C Q D F H Y S D V L F K Y A I T R M P N S S - G S I T R T T G Q S S D

Zebrafish (492) K P S F Q L L S I S L Q D Y H F S D S G L L T -----

Consensus (501) SDSFI QLPLPRSLHNYLLYADVLRM EIPELA IQDG S T
