# Supplementary material for: ASB3 ablation has no detectable effects on spermatogenesis and fertility in male mice
Source: PeerJ journal article supplement (doi:10.7717/peerj.19738), 2025-07-31
Supplement: RawdataFig5.zip [file ASB3-TUNEL.xlsx]

## Sheet: Sheet1
基因型	编号	Apoptotic cells	Apoptotic Tubules	Total Tubules	Apoptotic Tubules/Total Tubules	Mean	SD	Apoptotic cells/Total Tubules	Mean	SD
WT	1	42	29	120	0.241667	0.816667	0.0321551	0.35	0.4	0.0540062
WT	2	57	38	120	0.316667			0.475
WT	3	45	31	120	0.258333			0.375
HOM	1	51	37	120	0.308333	0.875	0.0136083	0.425	0.397222	0.0283279
HOM	2	43	35	120	0.291667			0.358333
HOM	3	49	33	120	0.275			0.408333
