# Supplementary material for: ASB3 ablation has no detectable effects on spermatogenesis and fertility in male mice
Source: PeerJ journal article supplement (doi:10.7717/peerj.19738), 2025-07-31
Supplement: RawdataFig5.zip [file maker excel.xlsx]

## Sheet: Sheet1
Liin28-heter					Liin28-KO
tubes	50	50	50		tubes	50	50	50
cells	285	321	334		cells	327	310	344
cells/tube	5.7	6.42	6.68		cells/tube	6.54	6.2	6.88
sox9-heter					sox9-KO
tubes	50	50	50		tubes	50	50	50
cells	745	822	801		cells	849	814	799
cells/tube	14.9	16.44	16.02		cells/tube	16.98	16.28	15.98
γ-H2AX-heter					γ-H2AX-KO
tubes	20	20	20		tubes	20	20	20
cells	1150	1324	1079		cells	1222	1138	1301
cells/tube	57.5	66.2	53.95		cells/tube	61.1	56.9	65.05
