# Supplementary material for: ASB3 ablation has no detectable effects on spermatogenesis and fertility in male mice
Source: PeerJ journal article supplement (doi:10.7717/peerj.19738), 2025-07-31
Supplement: the_information_for_primary_and_secondary_antibodies.docx [file the_information_for_primary_and_secondary_antibodies.docx]

Primary antibodies：

| Name | Reagent company | | | Catalog | Application | | Dilution | |
| --- | --- | --- | --- | --- | --- | --- | --- | --- |
| ASB3 | | abcepta | AP16752a | | | WB,IF | 1:1000 | | |
| Acetylated Tubulin | | Sigma | T6793 | | | IF | | 1:5000 | |
| γ-H2AX | | abcam | Ab26350 | | | IF | | 1:200 | |
| Lin28 | | abcam | Ab36020 | | | IF | | 1:200 | |
| Sox9 | | EMD | AB5535 | | | IF | | 1:200 | |

Secondary antibodies：

| Name | | Reagent company | | Catalog | Application | | Dilution | |
| --- | --- | --- | --- | --- | --- | --- | --- | --- |
| Alexa Fluor 488 donkey anti-mouse IgG （H+L） | Invitrogen | | A21202 | | IF | 1:500 | |
| Alexa Fluor 555 donkey anti-mouse IgG （H+L） | Invitrogen | | A31570 | | IF | 1:500 | |
| Alexa Fluor 488 donkey anti-rabbit IgG （H+L） | Invitrogen | | A21206 | | IF | 1:500 | |
| Alexa Fluor 555 donkey anti-rabbit IgG （H+L） | Invitrogen | | A31572 | | IF | 1:500 | |
