# Supplementary material for: ASB3 ablation has no detectable effects on spermatogenesis and fertility in male mice
Source: PeerJ journal article supplement (doi:10.7717/peerj.19738), 2025-07-31
Supplement: the_translations_for_the_nonEnglish_text_staffEH.docx [file the_translations_for_the_nonEnglish_text_staffEH.docx]

the translations for the non-English text used in the Raw_data_for_picture1.zip:

KO: knockout mice

WT: wild-type mice

mRNA相对表达：The relative expression of Asb3 mRNA

2021-07-10_000241：Amplified data and melting curve results

出生天数/各周龄：Postnatal Weeks

多组织脏器: various organs

多组织脏器表达: mRNA expression across various organs

the translations for the non-English text used in the Raw_data_for_picture2.zip:

保守性分析: Conservation analysis of protein sequences

多物种间保守性分析: Conservation analysis of protein sequences among multiple species

xct 2023-12-14 16h04m43s(GelRed): agarose gel electrophoresis band

the translations for the non-English text used in the Raw_data_for_picture3-A-F.zip:

ko: knockout mice

heter: heterozygous mice
